# Supplementary material for: Unlocking the novel genetic diversity and population structure of synthetic Hexaploid wheat
Source: BMC Genomics. 2018 Aug 6;19:591. doi: 10.1186/s12864-018-4969-2 (PMC6090860; doi:10.1186/s12864-018-4969-2)
Supplement: Supplementary file 7 — Details of 12 bread wheat cultivars used in this study. (XLSX 9 kb) [file 12864_2018_4969_MOESM7_ESM.xlsx]

## Sheet: Additional file 7
Additional file 7. Details of 12 bread wheat cultivars used in this study.
Bread wheat cultivar name	Pedigree	Additional Information	More Information1	MoreInformation2
Camelot	KS91H184/‘Arlin’ Sib//KS91HW29/3/NE91631/4/VBF0168	Reg. No. CV-1036, PI 653832
Cheyenne	Selection from Crimea	CI 8885
Freeman	KS92-946-B-15-1/'Alliance'	Reg. No. CV-1098, PI 667038
Gerek	MENTANA/MAYO-48//4-11/3/YAYLA-305	-
Goodstreak	SD3055/KS88H164//NE89646	Reg. No. CV-945, PI 632434
Harry	NE90614/NE87612	Reg. No. CV-946, PI 632435
Karahan	C-126-15/COLLAFEN/3/NORIN-10-BREVOR/P-14//(P101)	-
Overland	‘Millennium’ (PI 613099) sib/ND8974	Reg. No. CV-1020, PI 647959
Panhandle	NE97426/NE98574	CV-1117, PI 670462	NE97426= Brigantine/2*Arapahoe	NE98574=CO850267/Rawhide
Robidoux	NE96644/Wahoo (sib)	Reg. No. CV-1064, PI 659690
Ruth	OK98697/Jagalene//Camelot	PI 675998
Wesley	KS831936-3/NE86501	Reg. no. CV-890, PI 605742
