# Supplementary material for: Unlocking the novel genetic diversity and population structure of synthetic Hexaploid wheat
Source: BMC Genomics. 2018 Aug 6;19:591. doi: 10.1186/s12864-018-4969-2 (PMC6090860; doi:10.1186/s12864-018-4969-2)
Supplement: Supplementary file 8 — Genotyping-by-Sequencing derived SNP markers of 101 synthetic hexaploid wheats used in this study. (XLSX 15100 kb) [file 12864_2018_4969_MOESM8_ESM.xlsx]

## Sheet: 101shwadditionalfile2.hmp
rs#	alleles	chrom	pos	strand	assembly#	center	protLSID	assayLSID	panelLSID	QCcode	MBSYN38	MBSYN39	MBSYN32	MBSYN33	MBSYN30	MBSYN31	MBSYN36	MBSYN37	MBSYN34	MBSYN35	MBSYN49	MBSYN43	MBSYN44	MBSYN46	MBSYN40	MBSYN137	MBSYN138	MBSYN55	MBSYN52	MBSYN53	MBSYN58	MBSYN59	MBSYN56	MBSYN57	MBSYN50	MBSYN51	MBSYN141	MBSYN65	MBSYN66	MBSYN63	MBSYN64	MBSYN69	MBSYN67	MBSYN68	MBSYN61	MBSYN60	MBSYN115	MBSYN119	MBSYN117
S1A_1145442	G/A	1A	1145442	+	NA	NA	NA	NA	NA	NA	G	G	G	G	G	G	G	G	A	A	A	N	G	G	G	G	A	G	G	G	G	G	G	G	G	G	N	N	G	G	G	G	A	N	A	G	G	G	G
S1A_1238021	T/C	1A	1238021	+	NA	NA	NA	NA	NA	NA	Y	T	T	T	T	T	T	T	T	T	T	C	T	T	T	T	T	Y	T	T	T	T	T	T	Y	T	T	T	T	T	T	T	T	Y	T	T	T	T	T
S1A_1627509	A/G	1A	1627509	+	NA	NA	NA	NA	NA	NA	A	A	R	A	A	A	A	A	A	A	A	N	A	A	A	R	R	A	R	R	R	A	A	A	N	R	R	R	A	R	R	R	A	A	A	A	A	A	A
S1A_1627518	C/G	1A	1627518	+	NA	NA	NA	NA	NA	NA	C	C	S	C	C	C	C	C	C	C	C	N	C	C	C	S	S	C	S	S	S	C	C	C	N	S	S	S	C	S	S	S	C	C	C	C	C	C	C
S1A_1627520	C/G	1A	1627520	+	NA	NA	NA	NA	NA	NA	C	C	S	C	C	C	C	C	C	C	C	N	C	C	C	S	S	C	S	S	S	C	C	C	N	S	S	S	C	S	S	S	C	C	C	C	C	C	C
S1A_1627538	G/C	1A	1627538	+	NA	NA	NA	NA	NA	NA	G	G	S	G	G	G	G	G	G	G	G	N	G	G	G	S	S	G	S	S	S	G	G	G	N	S	S	S	G	S	S	S	G	G	G	G	G	G	G
S1A_1846774	A/G	1A	1846774	+	NA	NA	NA	NA	NA	NA	R	A	R	N	A	R	A	R	R	R	G	G	A	R	A	R	R	R	R	R	R	N	R	G	G	R	R	R	G	R	R	A	R	G	R	N	A	G	R
S1A_1846791	G/A	1A	1846791	+	NA	NA	NA	NA	NA	NA	G	G	G	N	G	G	G	G	G	G	G	A	G	G	G	G	G	G	G	G	G	N	G	G	A	G	G	G	G	G	G	G	G	A	G	N	G	G	G
S1A_1846793	C/G	1A	1846793	+	NA	NA	NA	NA	NA	NA	C	C	C	N	C	C	C	C	S	S	G	C	C	C	C	C	C	C	C	C	C	N	C	C	C	C	C	C	C	C	C	C	S	C	S	N	C	C	C
S1A_1846794	G/T	1A	1846794	+	NA	NA	NA	NA	NA	NA	K	G	K	N	G	K	G	K	K	K	T	T	G	K	G	K	K	K	K	K	K	N	K	T	T	K	K	K	T	K	K	G	K	T	K	N	G	T	K
S1A_1846809	G/T	1A	1846809	+	NA	NA	NA	NA	NA	NA	G	G	K	N	G	G	G	G	G	G	G	G	G	G	G	K	G	K	K	K	G	N	G	T	G	K	K	G	T	K	G	G	G	G	G	N	G	G	K
S1A_1846812	C/G	1A	1846812	+	NA	NA	NA	NA	NA	NA	C	C	S	N	C	C	C	C	C	C	C	C	C	C	C	S	C	S	S	S	C	N	C	G	C	S	S	C	G	S	C	C	C	C	C	N	C	C	S
S1A_1846816	A/G	1A	1846816	+	NA	NA	NA	NA	NA	NA	R	R	A	N	R	R	G	R	R	R	A	A	A	R	G	A	R	R	A	A	R	N	R	A	A	R	A	A	A	A	A	G	A	A	A	N	A	A	A
S1A_2200983	C/T	1A	2200983	+	NA	NA	NA	NA	NA	NA	C	Y	C	C	C	C	N	C	Y	Y	Y	C	C	C	Y	C	C	Y	C	C	C	N	C	Y	C	Y	C	C	Y	C	C	C	Y	C	Y	C	C	C	Y
S1A_2200995	C/T	1A	2200995	+	NA	NA	NA	NA	NA	NA	Y	Y	C	C	C	C	N	Y	C	C	C	C	C	C	C	C	C	C	C	C	Y	N	C	C	C	C	C	Y	C	C	Y	T	C	C	C	C	C	C	C
S1A_3469197	C/A	1A	3469197	+	NA	NA	NA	NA	NA	NA	M	A	C	C	C	C	A	C	C	C	C	C	A	A	N	C	A	N	C	C	A	N	A	C	C	N	C	C	N	C	C	A	C	C	C	A	C	A	N
S1A_3613561	A/G	1A	3613561	+	NA	NA	NA	NA	NA	NA	R	R	G	N	N	G	R	A	R	R	R	A	A	G	R	R	R	A	R	A	R	R	N	R	A	R	A	A	A	A	A	R	G	A	R	A	A	N	R
S1A_3613571	A/C	1A	3613571	+	NA	NA	NA	NA	NA	NA	A	M	A	N	N	A	M	A	A	A	M	M	M	A	M	A	M	A	A	A	A	A	N	M	A	M	A	M	C	A	M	A	A	M	M	M	M	N	A
S1A_3613582	G/A	1A	3613582	+	NA	NA	NA	NA	NA	NA	G	R	G	N	N	G	R	G	R	R	R	G	G	A	G	G	G	G	G	G	G	G	N	R	G	G	G	G	G	G	G	R	A	G	R	G	G	N	G
S1A_3619470	A/G	1A	3619470	+	NA	NA	NA	NA	NA	NA	R	G	A	A	A	N	G	N	A	R	G	A	R	R	R	A	G	R	A	A	R	R	G	A	N	R	A	A	G	R	A	G	R	A	R	R	A	G	R
S1A_3619483	T/G	1A	3619483	+	NA	NA	NA	NA	NA	NA	K	G	T	T	T	N	G	N	T	K	G	T	K	K	K	T	G	K	T	T	K	K	G	T	N	K	T	T	G	K	T	G	K	T	K	K	T	G	K
S1A_4159194	A/G	1A	4159194	+	NA	NA	NA	NA	NA	NA	A	A	G	A	G	A	A	A	A	A	A	N	A	G	N	G	A	G	G	G	A	N	G	A	G	N	G	A	N	G	A	A	A	G	A	A	G	G	N
S1A_4206801	C/T	1A	4206801	+	NA	NA	NA	NA	NA	NA	C	C	C	C	T	C	C	C	Y	C	C	T	C	C	C	C	C	Y	C	C	C	C	C	C	Y	C	C	C	C	C	C	C	C	C	C	C	T	C	C
S1A_4206812	G/A	1A	4206812	+	NA	NA	NA	NA	NA	NA	G	G	A	G	A	G	G	G	R	G	G	A	G	G	G	A	G	R	A	A	G	G	G	G	R	G	A	G	G	A	G	G	G	G	G	G	A	G	G
S1A_4206813	G/A	1A	4206813	+	NA	NA	NA	NA	NA	NA	G	G	G	A	G	G	G	G	G	G	G	G	G	G	G	G	G	G	G	G	G	G	G	G	G	G	G	A	G	G	A	G	G	G	G	G	G	G	G
S1A_4206845	C/T	1A	4206845	+	NA	NA	NA	NA	NA	NA	Y	Y	C	C	C	C	C	C	C	C	C	C	C	C	T	C	C	Y	C	C	C	T	C	Y	C	T	C	C	T	C	C	C	C	Y	C	C	C	C	T
S1A_4499966	A/G	1A	4499966	+	NA	NA	NA	NA	NA	NA	A	A	R	R	R	A	A	A	A	A	A	R	A	A	A	R	A	A	R	R	A	A	A	A	A	A	R	R	A	R	R	A	A	R	A	A	R	A	A
S1A_4499981	G/A	1A	4499981	+	NA	NA	NA	NA	NA	NA	G	G	R	R	R	G	G	G	G	G	G	R	G	R	G	R	G	G	R	R	G	G	R	G	G	G	R	R	G	R	R	G	G	R	G	G	R	G	G
S1A_4500081	C/A	1A	4500081	+	NA	NA	NA	NA	NA	NA	M	C	C	M	C	M	C	A	A	M	C	C	M	M	N	M	C	A	A	A	C	N	C	C	M	M	A	M	N	N	M	C	C	N	C	M	M	M	M
S1A_4500113	G/C	1A	4500113	+	NA	NA	NA	NA	NA	NA	S	G	G	S	G	S	G	C	C	S	G	G	S	S	N	S	G	C	C	C	G	N	G	G	S	S	C	S	N	N	S	G	G	N	G	S	S	S	S
S1A_4657817	C/G	1A	4657817	+	NA	NA	NA	NA	NA	NA	S	S	C	C	G	S	S	S	C	N	C	C	S	C	C	C	S	N	C	C	S	N	C	N	C	C	C	C	N	C	C	S	N	C	C	S	S	C	C
S1A_4662351	T/G	1A	4662351	+	NA	NA	NA	NA	NA	NA	T	T	T	T	T	T	T	T	T	K	K	T	T	T	T	T	T	T	T	T	T	T	T	K	T	T	T	T	T	T	T	T	T	T	K	T	T	T	T
S1A_4804732	T/C	1A	4804732	+	NA	NA	NA	NA	NA	NA	C	Y	T	C	C	C	Y	C	Y	C	C	T	Y	Y	N	T	C	T	T	T	C	N	Y	C	Y	N	T	Y	N	T	Y	Y	C	C	C	T	C	Y	N
S1A_4812349	C/A	1A	4812349	+	NA	NA	NA	NA	NA	NA	M	C	C	M	C	M	C	C	M	M	M	M	C	C	N	C	M	N	C	C	N	N	C	M	M	N	C	M	M	C	C	M	C	C	C	C	C	C	M
S1A_4812360	G/A	1A	4812360	+	NA	NA	NA	NA	NA	NA	R	R	G	R	G	R	R	R	R	R	R	R	G	G	N	G	R	N	G	G	N	N	G	G	R	N	G	R	R	G	G	R	G	G	G	G	G	G	R
S1A_4812367	T/C	1A	4812367	+	NA	NA	NA	NA	NA	NA	C	Y	T	Y	T	Y	Y	Y	Y	Y	C	Y	T	T	N	T	Y	N	T	T	N	N	T	Y	C	N	T	Y	C	T	T	Y	T	T	T	T	T	T	C
S1A_4812383	C/A	1A	4812383	+	NA	NA	NA	NA	NA	NA	M	M	C	M	C	M	M	M	M	M	M	M	C	C	N	C	M	N	C	C	N	N	C	C	M	N	C	M	M	C	C	M	C	C	C	C	C	C	M
S1A_4812384	G/A	1A	4812384	+	NA	NA	NA	NA	NA	NA	R	G	G	R	G	R	G	G	R	R	R	R	G	G	N	G	R	N	G	G	N	N	G	R	R	N	G	R	R	G	G	R	G	G	G	G	G	G	R
S1A_4847584	G/A	1A	4847584	+	NA	NA	NA	NA	NA	NA	G	R	G	G	G	R	G	G	R	G	G	N	G	G	G	A	G	G	G	G	G	G	G	G	G	R	G	G	G	G	G	R	G	G	G	G	R	G	R
S1A_4847604	C/T	1A	4847604	+	NA	NA	NA	NA	NA	NA	C	Y	C	C	C	Y	C	C	Y	C	C	N	C	C	C	T	C	C	C	C	C	C	C	C	C	Y	C	C	C	C	C	Y	C	C	C	C	Y	C	Y
S1A_4870134	T/C	1A	4870134	+	NA	NA	NA	NA	NA	NA	T	Y	T	C	N	Y	Y	Y	Y	T	Y	T	N	N	N	T	Y	N	T	T	Y	N	C	N	T	N	T	C	T	T	C	Y	Y	C	C	C	Y	C	T
S1A_4870156	G/T	1A	4870156	+	NA	NA	NA	NA	NA	NA	G	K	G	T	N	K	K	K	K	G	K	G	N	N	N	G	K	N	G	G	K	N	T	N	G	N	G	T	G	G	T	K	K	T	T	T	K	T	G
S1A_4870342	G/A	1A	4870342	+	NA	NA	NA	NA	NA	NA	G	G	G	G	G	R	G	G	A	R	G	G	N	G	N	G	R	G	G	G	G	G	G	G	A	G	G	N	G	G	N	G	G	G	G	G	G	G	G
S1A_5172177	C/T	1A	5172177	+	NA	NA	NA	NA	NA	NA	C	C	C	C	C	C	C	C	Y	C	C	T	C	C	N	Y	C	C	Y	Y	C	C	C	C	Y	C	T	C	C	Y	C	C	C	N	C	C	C	C	N
S1A_5172180	C/T	1A	5172180	+	NA	NA	NA	NA	NA	NA	C	Y	C	C	C	C	C	C	C	C	C	C	C	C	N	C	C	T	C	C	C	T	C	Y	C	T	C	C	T	C	C	C	C	N	C	C	C	C	N
S1A_5172185	G/A	1A	5172185	+	NA	NA	NA	NA	NA	NA	G	G	G	G	G	G	G	G	R	G	G	A	G	G	N	R	G	G	R	R	G	G	G	G	R	G	A	G	G	R	G	G	G	N	G	G	G	G	N
S1A_5172189	C/T	1A	5172189	+	NA	NA	NA	NA	NA	NA	C	C	T	C	C	C	C	C	C	C	C	C	C	C	N	Y	C	C	Y	Y	C	C	C	C	C	C	C	C	C	Y	C	C	C	N	C	C	C	C	N
S1A_5172193	A/G	1A	5172193	+	NA	NA	NA	NA	NA	NA	A	A	G	A	A	A	A	A	A	A	A	A	A	A	N	R	A	A	R	R	A	A	A	A	A	A	A	A	A	R	A	A	A	N	A	A	A	A	N
S1A_5172196	C/T	1A	5172196	+	NA	NA	NA	NA	NA	NA	C	C	C	C	C	C	C	C	C	C	C	C	C	Y	N	C	C	C	C	C	C	C	Y	C	Y	C	C	T	C	C	T	C	C	N	C	C	C	Y	N
S1A_5172203	C/T	1A	5172203	+	NA	NA	NA	NA	NA	NA	C	Y	C	C	C	C	C	C	C	C	C	C	C	C	N	C	C	T	C	C	C	T	C	Y	C	T	C	C	T	C	C	C	C	N	C	C	C	C	N
S1A_5172212	C/T	1A	5172212	+	NA	NA	NA	NA	NA	NA	C	C	T	C	C	C	C	C	C	C	C	C	C	C	N	Y	C	C	Y	Y	C	C	C	C	C	C	C	C	C	Y	C	C	C	N	C	C	C	C	N
S1A_5172226	G/A	1A	5172226	+	NA	NA	NA	NA	NA	NA	G	R	G	G	G	G	G	G	G	G	G	G	G	G	N	G	G	A	G	G	G	A	G	R	G	A	G	G	A	G	G	G	G	N	G	G	G	G	N
S1A_5172227	A/T	1A	5172227	+	NA	NA	NA	NA	NA	NA	A	A	T	A	A	A	A	A	A	A	A	A	A	A	N	W	A	A	W	W	A	A	A	A	A	A	A	A	A	W	A	A	A	N	A	A	A	A	N
S1A_5172636	C/A	1A	5172636	+	NA	NA	NA	NA	NA	NA	C	C	C	C	C	C	C	C	C	C	C	C	C	C	C	C	C	N	C	C	C	M	C	C	C	A	C	N	A	C	N	C	N	C	C	C	C	C	A
S1A_5172667	G/C	1A	5172667	+	NA	NA	NA	NA	NA	NA	G	G	G	G	G	G	G	G	S	G	G	S	G	G	G	S	G	N	S	G	G	G	G	G	C	G	S	N	G	C	N	G	N	G	G	G	G	G	G
S1A_5172679	C/T	1A	5172679	+	NA	NA	NA	NA	NA	NA	C	C	C	C	C	C	C	C	C	C	C	C	C	C	C	C	C	N	C	C	C	Y	C	C	C	T	C	N	T	C	N	C	N	C	C	C	C	C	T
S1A_5172688	G/T	1A	5172688	+	NA	NA	NA	NA	NA	NA	G	G	T	G	G	G	G	G	K	G	G	K	G	G	G	K	G	N	K	T	G	G	G	G	G	G	K	N	G	G	N	G	N	G	G	G	G	G	G
S1A_5190003	C/G	1A	5190003	+	NA	NA	NA	NA	NA	NA	C	C	S	C	C	C	C	C	C	C	C	S	C	C	C	C	C	C	S	C	C	C	C	C	C	C	C	C	C	S	C	C	C	C	C	C	C	C	C
S1A_5190010	G/A	1A	5190010	+	NA	NA	NA	NA	NA	NA	G	G	R	G	G	G	G	G	G	G	G	G	G	G	G	R	G	G	R	R	G	G	G	G	G	G	R	G	G	R	G	G	G	G	G	G	G	G	G
S1A_5491785	G/A	1A	5491785	+	NA	NA	NA	NA	NA	NA	G	G	G	G	G	G	G	G	G	G	G	G	G	G	A	G	G	A	G	G	G	A	G	R	G	A	G	N	A	G	N	G	G	G	G	G	G	G	A
S1A_5491807	A/G	1A	5491807	+	NA	NA	NA	NA	NA	NA	A	A	A	A	A	A	A	A	A	A	A	A	A	A	G	A	A	G	A	A	A	G	A	R	A	G	A	N	G	A	N	A	A	A	A	A	A	A	G
S1A_5491813	C/T	1A	5491813	+	NA	NA	NA	NA	NA	NA	C	C	C	C	C	C	C	C	C	C	C	C	C	C	T	C	C	T	C	C	C	T	C	Y	C	T	C	N	T	C	N	C	C	C	C	C	C	C	T
S1A_6370115	C/T	1A	6370115	+	NA	NA	NA	NA	NA	NA	Y	Y	C	N	Y	Y	Y	C	C	N	C	T	Y	C	C	C	Y	C	Y	T	N	C	N	N	N	Y	N	N	C	Y	N	T	C	C	C	Y	T	C	Y
S1A_6370123	C/T	1A	6370123	+	NA	NA	NA	NA	NA	NA	C	C	C	N	C	C	C	C	C	N	C	C	C	T	C	C	C	C	C	C	N	C	N	N	N	C	N	N	C	C	N	C	C	C	C	C	C	T	C
S1A_6370156	C/T	1A	6370156	+	NA	NA	NA	NA	NA	NA	C	C	C	N	C	C	C	C	C	N	C	C	C	T	C	C	C	C	C	C	N	C	N	N	N	C	N	N	C	C	N	C	C	C	C	C	C	T	C
S1A_6370170	T/C	1A	6370170	+	NA	NA	NA	NA	NA	NA	Y	T	C	N	T	Y	T	Y	T	N	T	T	T	T	T	C	Y	T	Y	T	N	T	N	N	N	T	N	N	T	Y	N	T	T	T	T	T	T	T	T
S1A_6398062	G/A	1A	6398062	+	NA	NA	NA	NA	NA	NA	G	R	G	N	R	A	N	G	R	R	R	N	N	R	G	R	R	G	R	N	R	R	R	R	R	G	G	N	G	R	N	A	G	N	R	A	R	R	G
S1A_6398063	C/A	1A	6398063	+	NA	NA	NA	NA	NA	NA	C	C	A	N	C	C	N	C	C	C	C	N	N	C	C	M	C	C	M	N	C	C	C	C	C	C	A	N	C	M	N	C	C	N	C	C	C	C	C
S1A_6409907	G/A	1A	6409907	+	NA	NA	NA	NA	NA	NA	G	N	R	G	N	G	N	G	R	G	G	G	A	G	N	G	G	A	G	G	N	N	G	N	G	N	G	G	G	G	A	A	G	G	R	A	N	G	G
S1A_6409912	C/T	1A	6409912	+	NA	NA	NA	NA	NA	NA	C	N	Y	C	N	C	N	C	Y	C	C	C	T	C	N	C	C	T	C	C	N	N	C	N	C	N	C	C	C	C	T	T	C	C	Y	T	N	C	C
S1A_6409945	A/C	1A	6409945	+	NA	NA	NA	NA	NA	NA	A	N	M	A	N	A	N	A	M	A	A	A	C	A	N	A	A	C	A	A	N	N	A	N	A	N	A	A	A	A	C	C	A	A	M	C	N	A	A
S1A_6409947	C/T	1A	6409947	+	NA	NA	NA	NA	NA	NA	C	N	C	T	N	Y	N	Y	C	Y	T	T	C	Y	N	Y	Y	C	C	C	N	N	Y	N	Y	N	C	T	T	C	C	C	Y	Y	Y	C	N	Y	C
S1A_6409957	G/A	1A	6409957	+	NA	NA	NA	NA	NA	NA	G	N	R	G	N	G	N	G	G	G	G	G	G	G	N	G	G	G	A	A	N	N	G	N	G	N	R	G	G	R	G	G	G	G	G	G	N	G	G
S1A_6409960	G/T	1A	6409960	+	NA	NA	NA	NA	NA	NA	G	N	G	G	N	G	N	G	G	G	G	G	G	G	N	G	G	G	G	G	N	N	G	N	K	N	G	G	G	G	G	G	G	G	G	G	N	K	G
S1A_6672378	C/T	1A	6672378	+	NA	NA	NA	NA	NA	NA	Y	C	Y	C	T	Y	C	C	C	T	C	Y	C	Y	C	T	C	Y	Y	Y	C	T	Y	Y	C	T	T	C	T	Y	C	C	T	C	Y	C	C	Y	T
S1A_7214024	G/A	1A	7214024	+	NA	NA	NA	NA	NA	NA	G	R	A	G	G	G	A	A	R	A	A	G	A	A	N	A	G	G	A	A	G	G	G	R	G	G	A	G	G	A	G	A	A	G	A	A	G	G	G
S1A_7274964	C/T	1A	7274964	+	NA	NA	NA	NA	NA	NA	Y	C	C	C	C	T	C	C	Y	C	C	T	C	C	C	C	T	Y	C	C	C	C	T	C	T	C	C	C	C	C	C	C	C	C	C	C	C	T	C
S1A_7277935	A/G	1A	7277935	+	NA	NA	NA	NA	NA	NA	A	N	A	G	G	A	A	A	N	A	A	A	A	A	N	A	A	G	A	A	G	G	A	R	N	G	A	A	G	N	N	A	A	R	A	A	G	A	G
S1A_7293976	A/G	1A	7293976	+	NA	NA	NA	NA	NA	NA	A	A	A	G	A	A	A	A	A	A	A	G	A	A	G	A	A	G	A	A	A	G	A	R	G	G	A	A	G	A	A	A	A	A	A	A	A	A	G
S1A_7794523	A/C	1A	7794523	+	NA	NA	NA	NA	NA	NA	M	M	A	A	A	A	A	M	N	N	A	A	M	A	A	A	C	N	A	N	C	A	M	A	A	A	A	M	A	A	M	M	A	M	A	M	C	M	N
S1A_8295817	T/C	1A	8295817	+	NA	NA	NA	NA	NA	NA	Y	C	T	C	C	T	C	T	T	T	T	T	C	T	T	T	C	T	T	T	T	T	T	T	N	T	T	C	T	T	C	C	T	C	T	C	T	T	T
S1A_8715996	A/T	1A	8715996	+	NA	NA	NA	NA	NA	NA	A	W	W	A	A	W	W	A	W	A	A	W	A	A	A	W	W	A	W	A	W	A	W	W	W	W	W	A	A	W	A	W	A	A	A	A	A	A	W
S1A_9236518	A/T	1A	9236518	+	NA	NA	NA	NA	NA	NA	T	A	A	A	A	A	A	T	A	A	T	A	A	T	A	A	A	W	A	A	T	A	T	W	W	A	A	A	A	A	A	A	T	A	T	A	T	T	A
S1A_9565863	G/A	1A	9565863	+	NA	NA	NA	NA	NA	NA	A	G	N	G	G	G	G	A	N	A	A	G	G	A	G	A	G	G	A	A	N	R	A	R	N	G	A	G	G	A	G	G	A	G	A	G	N	A	G
S1A_9600607	C/G	1A	9600607	+	NA	NA	NA	NA	NA	NA	N	C	G	C	C	C	C	N	N	N	N	C	C	N	N	G	C	C	G	G	C	C	N	C	C	C	G	C	C	G	C	C	N	C	N	C	C	N	C
S1A_9600655	A/C	1A	9600655	+	NA	NA	NA	NA	NA	NA	N	A	C	C	A	A	A	N	N	N	N	A	A	N	N	C	C	A	C	C	C	A	N	A	A	A	C	A	A	C	A	A	N	A	N	A	C	N	A
S1A_9968663	C/T	1A	9968663	+	NA	NA	NA	NA	NA	NA	C	T	T	N	N	C	T	N	C	C	C	C	T	C	C	T	T	C	T	T	T	C	N	C	C	C	T	T	C	T	T	T	C	T	C	T	T	N	Y
S1A_9972042	G/A	1A	9972042	+	NA	NA	NA	NA	NA	NA	G	R	G	A	G	G	A	G	G	N	G	G	A	G	G	G	A	G	G	G	A	G	G	G	G	G	G	A	G	G	A	A	G	A	R	A	A	G	A
S1A_9972049	A/G	1A	9972049	+	NA	NA	NA	NA	NA	NA	R	R	A	G	G	A	G	G	A	N	A	A	G	R	A	A	G	A	A	A	G	A	G	A	A	A	A	G	A	A	G	G	A	G	R	G	G	G	G
S1A_9973314	A/G	1A	9973314	+	NA	NA	NA	NA	NA	NA	G	R	A	A	G	G	A	G	N	A	G	G	A	G	G	A	A	G	N	A	A	G	G	G	G	N	A	A	G	A	A	A	N	A	R	A	A	N	G
S1A_10132850	T/C	1A	10132850	+	NA	NA	NA	NA	NA	NA	T	T	T	T	T	T	T	Y	T	Y	T	T	T	T	T	Y	T	Y	Y	T	T	T	T	T	Y	T	Y	T	T	T	T	T	T	T	T	T	Y	T	T
S1A_10132856	G/A	1A	10132856	+	NA	NA	NA	NA	NA	NA	A	G	G	G	A	G	G	R	G	G	A	G	G	A	G	G	G	R	G	G	G	G	A	R	R	G	G	G	G	G	G	G	A	G	A	G	G	A	G
S1A_10132860	A/G	1A	10132860	+	NA	NA	NA	NA	NA	NA	A	A	A	A	A	A	A	R	A	R	A	A	A	A	A	R	A	R	R	A	A	A	A	A	R	A	R	A	A	A	A	A	A	A	A	A	R	A	A
S1A_10135876	C/T	1A	10135876	+	NA	NA	NA	NA	NA	NA	Y	C	C	C	Y	C	C	C	C	C	T	C	C	T	C	C	C	Y	C	C	C	C	Y	Y	Y	C	C	C	C	C	C	C	T	C	Y	C	C	Y	C
S1A_10135900	G/A	1A	10135900	+	NA	NA	NA	NA	NA	NA	G	R	A	G	G	A	G	G	G	G	G	A	G	G	A	R	G	R	R	R	G	A	G	R	R	A	R	G	A	R	G	G	G	G	G	G	G	G	A
S1A_10214692	T/A	1A	10214692	+	NA	NA	NA	NA	NA	NA	T	T	T	T	A	T	T	A	T	T	A	T	T	A	T	T	T	W	T	T	T	N	N	W	T	T	T	A	T	T	A	T	A	N	A	T	T	A	T
S1A_10223986	C/T	1A	10223986	+	NA	NA	NA	NA	NA	NA	T	C	C	Y	T	N	C	T	C	C	T	C	C	T	C	C	C	C	C	C	C	Y	T	C	C	C	C	T	C	C	T	C	T	C	T	C	C	T	C
S1A_10225558	A/G	1A	10225558	+	NA	NA	NA	NA	NA	NA	G	A	A	R	G	A	A	G	A	A	G	A	A	G	A	A	A	A	A	A	A	A	G	A	A	A	A	G	A	A	G	A	G	A	R	A	A	G	A
S1A_10225572	G/C	1A	10225572	+	NA	NA	NA	NA	NA	NA	C	G	G	S	C	G	G	C	G	G	C	G	G	C	G	G	G	G	G	G	G	G	C	G	G	G	G	C	G	G	C	G	C	G	S	G	G	C	G
S1A_10407007	C/T	1A	10407007	+	NA	NA	NA	NA	NA	NA	Y	C	C	C	N	C	C	N	C	C	T	C	C	T	C	C	C	C	C	N	C	C	N	Y	N	C	C	T	C	C	T	C	T	C	T	C	C	N	C
S1A_10407013	C/T	1A	10407013	+	NA	NA	NA	NA	NA	NA	Y	C	C	C	N	C	C	N	C	C	T	C	C	T	C	C	C	C	C	N	C	C	N	Y	N	C	C	T	C	C	T	C	T	C	T	C	C	N	C
S1A_10423230	A/C	1A	10423230	+	NA	NA	NA	NA	NA	NA	N	A	A	A	N	A	A	C	M	M	A	A	A	A	A	A	A	M	A	A	A	A	N	A	C	A	A	A	A	A	A	A	A	A	A	A	M	N	A
S1A_10423260	A/G	1A	10423260	+	NA	NA	NA	NA	NA	NA	N	A	A	R	N	A	A	G	R	R	G	A	A	G	A	A	A	R	A	A	A	A	N	R	G	A	A	G	A	A	G	A	G	A	R	A	R	N	A
S1A_10607227	C/T	1A	10607227	+	NA	NA	NA	NA	NA	NA	N	C	C	N	T	C	C	T	C	C	T	C	C	T	C	C	C	C	C	C	C	C	N	Y	N	C	C	T	C	N	T	C	T	C	Y	C	C	T	C
S1A_10607278	T/C	1A	10607278	+	NA	NA	NA	NA	NA	NA	N	T	T	N	C	T	T	C	T	T	C	T	T	C	T	T	T	T	T	T	T	T	N	Y	N	T	T	C	T	N	C	T	C	T	Y	T	T	C	T
S1A_10607314	C/T	1A	10607314	+	NA	NA	NA	NA	NA	NA	T	C	C	Y	T	C	C	T	C	C	T	C	C	T	C	C	C	Y	C	C	C	Y	T	Y	C	C	C	T	C	C	T	C	T	C	Y	C	C	T	C
S1A_10743206	G/A	1A	10743206	+	NA	NA	NA	NA	NA	NA	A	G	G	G	A	G	G	A	G	G	A	G	G	A	G	G	G	R	G	G	G	G	A	R	R	G	G	A	G	G	A	G	A	G	R	G	G	A	G
S1A_11066902	C/T	1A	11066902	+	NA	NA	NA	NA	NA	NA	C	C	C	C	N	C	C	C	N	Y	N	T	C	C	T	C	T	C	C	C	C	C	Y	C	C	C	C	C	Y	C	C	C	C	C	C	C	C	T	C
S1A_11207645	G/A	1A	11207645	+	NA	NA	NA	NA	NA	NA	G	G	G	N	G	G	G	G	G	G	N	G	G	N	G	G	A	G	G	G	A	G	G	G	G	G	G	N	G	G	G	G	N	G	G	G	A	G	G
S1A_11207693	C/T	1A	11207693	+	NA	NA	NA	NA	NA	NA	T	C	C	N	T	C	C	T	C	C	N	C	C	N	C	C	C	C	C	C	C	C	T	C	C	C	C	N	C	C	T	C	N	C	T	C	C	T	C
S1A_11208423	C/T	1A	11208423	+	NA	NA	NA	NA	NA	NA	T	C	C	C	N	N	C	T	C	C	T	C	C	T	C	C	C	C	C	C	C	C	T	C	C	C	C	N	C	C	T	C	T	N	C	C	C	T	C
S1A_11208461	C/T	1A	11208461	+	NA	NA	NA	NA	NA	NA	T	C	C	C	N	N	C	T	C	C	T	C	C	T	C	C	C	C	C	C	C	C	T	C	C	C	C	N	C	C	T	C	T	N	C	C	C	T	C
S1A_11208470	C/T	1A	11208470	+	NA	NA	NA	NA	NA	NA	T	C	C	C	N	N	C	T	C	C	T	C	C	T	C	C	C	C	C	C	C	C	T	C	C	C	C	N	C	C	T	C	T	N	C	C	C	T	C
S1A_11810975	C/G	1A	11810975	+	NA	NA	NA	NA	NA	NA	C	C	G	C	C	G	C	C	C	C	C	S	C	C	G	G	C	S	G	G	C	G	C	S	G	G	N	C	G	G	C	C	C	C	S	C	C	C	S
S1A_12011526	A/G	1A	12011526	+	NA	NA	NA	NA	NA	NA	G	A	A	A	A	A	A	G	G	G	A	A	A	G	A	A	G	A	A	A	A	A	G	A	R	A	A	N	A	A	N	A	A	A	A	A	A	G	A
S1A_12011541	A/C	1A	12011541	+	NA	NA	NA	NA	NA	NA	C	A	A	A	A	A	A	C	C	C	A	A	A	C	A	A	C	A	A	A	A	A	C	A	M	A	A	N	A	A	N	A	A	A	A	A	A	C	A
S1A_12092096	G/A	1A	12092096	+	NA	NA	NA	NA	NA	NA	A	G	G	A	A	G	G	A	A	N	G	G	G	G	G	G	A	G	G	G	A	G	A	G	G	G	G	G	G	G	G	G	G	R	G	G	A	A	G
S1A_12130274	C/A	1A	12130274	+	NA	NA	NA	NA	NA	NA	C	C	C	C	M	C	C	C	C	C	C	C	M	C	M	C	C	C	C	C	C	C	C	M	C	C	C	N	M	C	A	C	M	C	M	M	M	C	C
S1A_12130282	G/A	1A	12130282	+	NA	NA	NA	NA	NA	NA	G	G	G	G	R	G	G	G	G	G	G	G	R	G	R	G	G	G	G	G	G	G	G	R	G	G	G	N	R	G	A	G	R	G	R	R	R	G	G
S1A_12130285	A/G	1A	12130285	+	NA	NA	NA	NA	NA	NA	A	A	A	A	R	A	A	A	A	A	A	A	R	A	R	A	A	A	A	A	A	A	A	R	A	A	A	N	R	A	G	A	R	A	R	R	R	A	A
S1A_12130376	T/C	1A	12130376	+	NA	NA	NA	NA	NA	NA	Y	C	T	C	C	T	C	C	C	C	T	Y	C	Y	T	T	C	Y	T	T	C	T	C	T	T	T	T	N	T	T	N	C	T	Y	Y	C	C	C	T
S1A_12192364	C/T	1A	12192364	+	NA	NA	NA	NA	NA	NA	C	C	C	N	N	C	N	C	C	C	T	C	N	Y	C	C	C	C	C	C	T	C	C	C	C	T	C	N	C	C	N	N	T	Y	C	N	T	C	Y
S1A_12369428	C/G	1A	12369428	+	NA	NA	NA	NA	NA	NA	S	C	C	C	C	C	C	G	C	C	C	C	C	S	C	C	G	C	C	C	C	C	G	C	G	C	C	C	C	C	C	C	C	C	C	C	C	G	C
S1A_12369432	A/G	1A	12369432	+	NA	NA	NA	NA	NA	NA	G	G	A	G	G	A	G	G	A	A	A	A	G	R	A	A	G	A	A	A	G	R	G	A	G	A	A	A	A	A	A	G	A	R	A	G	G	G	A
S1A_12587922	A/C	1A	12587922	+	NA	NA	NA	NA	NA	NA	A	A	M	A	A	M	A	A	A	A	A	M	A	A	M	M	M	M	M	M	A	M	A	M	A	A	M	A	M	M	A	A	A	A	M	A	A	A	M
S1A_12587927	C/T	1A	12587927	+	NA	NA	NA	NA	NA	NA	Y	Y	Y	T	C	Y	C	C	T	T	T	Y	C	Y	Y	Y	C	Y	Y	Y	C	Y	C	Y	Y	T	Y	T	Y	Y	T	C	T	Y	Y	C	C	Y	Y
S1A_12587928	C/T	1A	12587928	+	NA	NA	NA	NA	NA	NA	C	C	Y	C	C	Y	C	C	C	C	C	Y	C	C	Y	Y	Y	Y	Y	Y	C	Y	C	Y	C	C	Y	C	Y	Y	C	C	C	C	Y	C	C	C	Y
S1A_12587929	A/T	1A	12587929	+	NA	NA	NA	NA	NA	NA	W	W	W	T	A	W	A	A	T	T	T	W	A	W	W	W	A	W	W	W	A	W	A	W	W	T	W	T	W	W	T	A	T	W	W	A	A	W	W
S1A_12587938	T/C	1A	12587938	+	NA	NA	NA	NA	NA	NA	T	T	Y	T	T	Y	T	T	T	T	T	Y	T	T	Y	Y	Y	Y	Y	Y	T	Y	T	Y	T	T	Y	T	Y	Y	T	T	T	T	Y	T	T	T	Y
S1A_12587950	G/A	1A	12587950	+	NA	NA	NA	NA	NA	NA	R	R	R	A	G	R	G	G	A	A	A	R	G	R	R	R	G	R	R	R	G	R	G	R	R	A	R	A	R	R	A	G	A	R	R	G	G	R	R
S1A_12587960	C/T	1A	12587960	+	NA	NA	NA	NA	NA	NA	Y	Y	Y	T	C	Y	C	C	T	T	T	Y	C	Y	Y	Y	C	Y	Y	Y	C	Y	C	Y	Y	T	Y	T	Y	Y	T	C	T	Y	Y	C	C	Y	Y
S1A_12822041	T/C	1A	12822041	+	NA	NA	NA	NA	NA	NA	T	T	T	T	T	T	T	N	T	T	C	T	T	Y	T	T	T	T	T	T	T	T	T	Y	T	T	T	T	T	T	T	T	C	Y	Y	T	T	T	T
S1A_13806016	G/A	1A	13806016	+	NA	NA	NA	NA	NA	NA	G	G	G	G	G	G	G	G	G	G	G	G	R	G	R	G	G	G	G	G	A	G	G	G	G	R	G	G	G	G	R	G	G	G	G	R	N	G	G
S1A_13806160	C/G	1A	13806160	+	NA	NA	NA	NA	NA	NA	C	C	C	C	C	C	C	C	C	C	C	C	S	C	S	C	N	C	C	C	G	C	C	C	C	S	C	S	C	C	S	C	C	C	S	S	N	C	C
S1A_13806164	C/A	1A	13806164	+	NA	NA	NA	NA	NA	NA	C	C	C	C	C	C	C	C	C	C	C	C	M	C	M	C	N	C	C	C	A	C	C	C	C	M	C	M	C	C	M	C	C	C	M	M	N	C	C
S1A_13806217	A/C	1A	13806217	+	NA	NA	NA	NA	NA	NA	A	M	C	A	M	M	M	A	C	C	A	M	M	A	M	C	A	M	M	M	M	C	A	M	A	A	M	A	M	M	A	M	A	A	M	M	A	A	M
S1A_13806220	C/G	1A	13806220	+	NA	NA	NA	NA	NA	NA	S	C	C	S	C	C	C	S	C	C	S	C	C	S	C	C	S	C	C	C	C	C	G	S	S	G	C	S	C	C	S	C	S	G	C	C	C	G	S
S1A_13844079	T/C	1A	13844079	+	NA	NA	NA	NA	NA	NA	T	T	C	N	C	T	T	T	C	C	T	T	T	T	C	C	N	C	C	N	T	C	N	C	N	N	C	N	Y	C	N	T	T	T	Y	T	T	N	C
S1A_13844082	C/T	1A	13844082	+	NA	NA	NA	NA	NA	NA	C	C	T	N	T	C	C	C	T	T	C	C	C	C	T	T	N	T	T	N	C	T	N	T	N	N	T	N	Y	T	N	C	C	C	Y	C	C	N	T
S1A_13844180	C/T	1A	13844180	+	NA	NA	NA	NA	NA	NA	T	C	C	N	C	C	C	T	C	C	T	C	C	T	C	C	N	C	C	C	C	C	N	Y	N	N	C	N	Y	C	N	C	T	T	Y	C	C	N	C
S1A_13861936	C/T	1A	13861936	+	NA	NA	NA	NA	NA	NA	Y	C	C	Y	C	C	C	C	C	C	C	C	C	Y	C	C	T	Y	C	C	C	C	T	C	T	T	C	C	C	C	C	C	C	Y	C	C	C	T	C
S1A_13940761	T/G	1A	13940761	+	NA	NA	NA	NA	NA	NA	T	G	T	T	N	G	G	T	T	T	T	G	G	T	T	T	T	T	T	T	G	T	T	T	T	T	T	T	T	T	T	G	T	T	K	G	N	T	T
S1A_13940776	C/G	1A	13940776	+	NA	NA	NA	NA	NA	NA	S	G	C	S	N	G	G	C	C	C	C	G	G	C	C	C	C	C	C	C	G	S	C	C	C	C	C	C	C	C	C	G	C	C	S	G	N	C	C
S1A_13940881	G/C	1A	13940881	+	NA	NA	NA	NA	NA	NA	S	C	G	S	N	C	C	G	G	G	G	C	C	G	G	N	G	G	G	G	C	G	G	G	G	G	N	G	G	G	G	C	G	G	G	C	C	G	G
S1A_14065650	A/C	1A	14065650	+	NA	NA	NA	NA	NA	NA	M	A	C	C	A	A	A	A	C	C	A	A	A	A	M	C	A	M	C	C	A	C	N	M	A	A	C	A	A	C	A	A	A	A	M	A	A	A	M
S1A_14065656	C/T	1A	14065656	+	NA	NA	NA	NA	NA	NA	C	C	C	C	C	C	C	C	C	C	C	C	Y	C	Y	C	C	C	C	C	Y	C	N	C	C	T	C	T	C	C	Y	C	C	C	C	Y	C	C	Y
S1A_14065663	T/A	1A	14065663	+	NA	NA	NA	NA	NA	NA	T	T	T	T	T	T	T	T	T	T	T	T	W	T	W	T	T	T	T	T	W	T	N	T	T	A	T	A	T	T	W	T	T	T	T	W	T	T	W
S1A_14161167	G/C	1A	14161167	+	NA	NA	NA	NA	NA	NA	G	G	G	C	G	G	G	G	G	G	C	G	G	G	G	G	G	G	G	G	G	G	G	S	G	G	G	C	C	G	C	G	C	N	S	G	G	G	G
S1A_14161172	A/G	1A	14161172	+	NA	NA	NA	NA	NA	NA	R	A	G	A	A	A	A	A	G	G	A	A	A	A	G	G	A	R	G	G	A	G	A	R	A	A	G	A	A	G	A	A	A	N	R	A	A	A	R
S1A_14468568	C/A	1A	14468568	+	NA	NA	NA	NA	NA	NA	C	C	C	C	A	A	C	C	C	C	C	A	C	C	C	C	N	C	C	C	C	C	N	N	N	C	C	A	C	C	N	C	N	N	C	C	N	C	C
S1A_14468953	C/T	1A	14468953	+	NA	NA	NA	NA	NA	NA	C	C	C	C	C	C	C	C	C	C	C	C	Y	C	Y	N	C	C	C	C	Y	C	C	C	C	C	C	Y	C	C	Y	C	C	C	Y	Y	C	C	C
S1A_14468958	C/G	1A	14468958	+	NA	NA	NA	NA	NA	NA	C	C	C	C	C	C	C	C	C	C	C	C	S	C	S	N	C	C	C	C	S	C	C	C	C	C	C	S	C	C	S	C	C	C	S	S	C	C	C
S1A_14520449	G/T	1A	14520449	+	NA	NA	NA	NA	NA	NA	T	K	T	K	G	G	G	T	T	T	G	G	G	K	T	T	T	T	T	T	G	T	T	K	T	G	T	T	G	T	T	G	G	G	K	G	G	T	K
S1A_14520452	C/G	1A	14520452	+	NA	NA	NA	NA	NA	NA	C	S	C	C	C	G	G	C	C	C	C	G	G	C	C	C	C	C	C	C	G	C	C	C	C	C	C	C	C	C	C	G	C	C	S	G	G	C	C
S1A_14593146	A/G	1A	14593146	+	NA	NA	NA	NA	NA	NA	G	R	R	R	A	A	A	N	R	R	A	A	N	N	G	A	A	G	R	R	G	G	A	R	A	G	R	A	A	R	A	A	N	G	R	N	A	N	R
S1A_14593155	A/G	1A	14593155	+	NA	NA	NA	NA	NA	NA	G	R	R	R	A	A	A	N	R	R	A	A	N	N	G	A	A	G	R	R	G	G	A	R	A	G	R	A	A	R	A	A	N	G	R	N	A	N	R
S1A_14769280	T/C	1A	14769280	+	NA	NA	NA	NA	NA	NA	T	C	N	C	Y	Y	C	T	T	T	Y	C	C	C	N	N	T	T	T	N	C	T	T	Y	T	Y	N	N	Y	N	N	C	Y	T	Y	C	Y	T	T
S1A_14769282	C/T	1A	14769282	+	NA	NA	NA	NA	NA	NA	C	T	N	T	Y	Y	T	C	C	C	Y	T	T	T	N	N	C	C	C	N	T	C	C	Y	C	Y	N	N	Y	N	N	T	Y	C	Y	T	Y	C	C
S1A_14805921	C/T	1A	14805921	+	NA	NA	NA	NA	NA	NA	C	C	T	Y	C	N	C	C	T	T	C	C	C	C	T	T	C	Y	N	T	C	N	C	C	N	C	N	N	C	T	N	C	C	C	Y	C	C	C	T
S1A_14805925	C/A	1A	14805925	+	NA	NA	NA	NA	NA	NA	C	C	A	M	C	N	C	C	A	A	C	C	C	C	A	A	C	M	N	A	C	N	C	C	N	C	N	N	C	A	N	C	C	C	M	C	C	C	A
S1A_14805951	G/A	1A	14805951	+	NA	NA	NA	NA	NA	NA	G	G	A	R	G	N	G	G	A	A	G	G	G	G	A	A	G	R	N	A	G	N	G	G	N	G	N	N	G	A	N	G	G	G	R	G	G	G	A
S1A_14840437	C/T	1A	14840437	+	NA	NA	NA	NA	NA	NA	Y	C	C	C	C	C	C	C	C	C	C	C	C	T	C	C	T	Y	C	C	C	C	T	C	T	C	C	C	C	C	C	C	C	C	C	C	C	T	C
S1A_14840448	G/A	1A	14840448	+	NA	NA	NA	NA	NA	NA	R	R	A	R	G	G	G	G	A	A	G	G	G	G	A	A	G	R	A	A	G	A	G	G	G	G	A	G	G	A	G	G	G	G	R	G	G	G	A
S1A_14840452	C/T	1A	14840452	+	NA	NA	NA	NA	NA	NA	Y	Y	T	Y	C	C	C	C	T	T	C	C	C	C	T	T	C	Y	T	T	C	T	C	C	C	C	T	C	C	T	C	C	C	C	Y	C	C	C	T
S1A_15182238	A/G	1A	15182238	+	NA	NA	NA	NA	NA	NA	A	R	A	A	A	R	R	A	A	A	A	R	R	A	A	A	A	A	A	A	R	A	A	A	A	A	A	A	A	A	A	R	A	A	A	R	R	A	A
S1A_15345687	A/T	1A	15345687	+	NA	NA	NA	NA	NA	NA	A	A	A	A	N	W	A	A	A	A	A	A	T	A	A	A	A	A	A	A	T	A	A	A	A	A	A	A	T	A	A	A	A	A	A	W	T	A	A
S1A_15345707	G/C	1A	15345707	+	NA	NA	NA	NA	NA	NA	S	S	C	G	N	G	G	G	C	C	G	G	G	S	C	C	C	C	C	C	G	C	C	C	C	G	C	G	G	C	G	G	G	G	C	G	G	C	S
S1A_15516712	A/G	1A	15516712	+	NA	NA	NA	NA	NA	NA	G	R	G	A	A	A	A	A	G	G	A	A	A	R	G	G	G	G	G	G	A	G	G	G	G	N	G	A	A	G	A	A	A	A	R	A	A	G	G
S1A_15516724	T/C	1A	15516724	+	NA	NA	NA	NA	NA	NA	C	Y	C	T	T	T	T	T	C	C	T	T	T	Y	C	C	C	C	C	C	T	C	C	C	C	N	C	T	T	C	T	T	T	T	Y	T	T	C	C
S1A_15516728	G/C	1A	15516728	+	NA	NA	NA	NA	NA	NA	C	S	C	G	G	G	G	G	C	C	G	G	G	S	C	C	C	C	C	C	G	C	C	C	C	N	C	G	G	C	G	G	G	G	S	G	G	C	C
S1A_16417367	G/C	1A	16417367	+	NA	NA	NA	NA	NA	NA	S	C	C	G	G	G	N	G	C	C	G	G	N	S	C	C	C	C	C	C	G	C	C	C	C	N	C	G	G	C	G	N	G	G	S	N	G	C	C
S1A_16914205	T/C	1A	16914205	+	NA	NA	NA	NA	NA	NA	Y	Y	C	T	T	T	T	T	C	C	T	T	T	Y	C	C	C	C	C	C	T	C	N	Y	C	T	C	T	T	C	T	T	T	T	Y	T	T	C	Y
S1A_16933279	A/G	1A	16933279	+	NA	NA	NA	NA	NA	NA	N	R	G	A	A	A	A	A	N	G	A	A	A	A	G	G	A	R	G	N	A	G	A	G	A	A	N	N	A	G	A	A	A	A	R	A	A	A	R
S1A_16933329	G/C	1A	16933329	+	NA	NA	NA	NA	NA	NA	N	S	C	G	G	G	G	G	N	C	G	G	G	G	C	C	G	S	C	N	G	C	G	C	G	G	N	N	G	C	G	G	G	G	S	G	G	G	S
S1A_17008847	T/C	1A	17008847	+	NA	NA	NA	NA	NA	NA	T	T	C	T	T	T	T	T	C	C	T	T	T	T	C	C	T	C	C	C	T	N	T	C	T	T	C	T	T	C	T	T	N	T	Y	T	T	T	C
S1A_17103611	C/G	1A	17103611	+	NA	NA	NA	NA	NA	NA	C	S	G	C	C	C	C	N	G	G	N	C	C	C	G	G	N	S	G	G	N	G	N	G	C	C	G	N	N	G	N	C	N	C	G	C	N	C	G
S1A_17103612	A/G	1A	17103612	+	NA	NA	NA	NA	NA	NA	A	R	G	A	A	A	A	N	G	G	N	A	A	A	G	G	N	R	G	G	N	G	N	G	A	A	G	N	N	G	N	A	N	A	G	A	N	A	G
S1A_17103618	G/T	1A	17103618	+	NA	NA	NA	NA	NA	NA	G	K	T	G	G	G	G	N	T	T	N	G	G	G	T	T	N	K	T	T	N	T	N	T	G	G	T	N	N	T	N	G	N	G	T	G	N	G	T
S1A_17103652	C/T	1A	17103652	+	NA	NA	NA	NA	NA	NA	N	Y	T	N	C	C	C	N	T	T	N	C	C	C	T	T	N	Y	T	T	N	T	C	T	C	C	T	N	N	T	N	C	N	N	T	C	N	C	Y
S1A_17103665	C/T	1A	17103665	+	NA	NA	NA	NA	NA	NA	N	Y	T	N	C	C	C	N	T	T	N	C	C	C	T	T	N	Y	T	T	N	T	C	T	C	C	T	N	N	T	N	C	N	N	T	C	N	C	Y
S1A_17748135	C/G	1A	17748135	+	NA	NA	NA	NA	NA	NA	C	C	G	C	C	C	C	C	G	G	C	C	C	C	G	G	C	S	G	G	N	G	C	S	C	C	G	C	C	G	C	C	C	C	N	C	C	C	S
S1A_17748146	C/T	1A	17748146	+	NA	NA	NA	NA	NA	NA	C	C	T	C	C	C	C	C	T	T	C	C	C	C	T	T	C	Y	T	T	N	T	C	Y	C	C	T	C	C	T	C	C	C	C	N	C	C	C	Y
S1A_17748150	C/T	1A	17748150	+	NA	NA	NA	NA	NA	NA	C	C	T	C	C	C	C	C	T	T	C	C	C	C	T	T	C	Y	T	T	N	T	C	Y	C	C	T	C	C	T	C	C	C	C	N	C	C	C	Y
S1A_17748156	A/G	1A	17748156	+	NA	NA	NA	NA	NA	NA	A	A	G	A	A	A	A	A	G	G	A	A	A	A	G	G	A	R	G	G	N	G	A	R	A	A	G	A	A	G	A	A	A	A	N	A	A	A	R
S1A_17748367	T/C	1A	17748367	+	NA	NA	NA	NA	NA	NA	N	T	C	T	T	T	T	N	C	C	T	T	T	T	N	C	T	C	C	C	T	C	T	Y	N	T	C	N	N	C	N	T	N	T	C	T	T	T	Y
S1A_17748720	G/C	1A	17748720	+	NA	NA	NA	NA	NA	NA	S	G	C	G	G	G	G	C	C	C	G	G	N	G	C	C	G	C	C	C	G	C	G	S	G	G	N	G	G	C	G	G	G	G	S	G	G	N	S
S1A_17748727	C/A	1A	17748727	+	NA	NA	NA	NA	NA	NA	C	C	A	C	C	C	C	C	A	A	C	C	N	C	A	A	C	A	A	A	C	A	C	M	C	C	N	C	C	A	C	C	C	C	M	C	C	N	M
S1A_17748746	G/A	1A	17748746	+	NA	NA	NA	NA	NA	NA	R	G	A	G	G	G	G	A	A	A	G	G	N	G	A	A	G	A	A	A	G	A	G	R	G	G	N	G	G	A	G	G	G	G	R	G	G	N	R
S1A_17748762	G/C	1A	17748762	+	NA	NA	NA	NA	NA	NA	G	G	C	G	G	G	G	G	C	C	G	G	N	G	C	C	G	C	C	C	G	C	G	S	G	G	N	G	G	C	G	G	G	G	S	G	G	N	S
S1A_17784486	T/C	1A	17784486	+	NA	NA	NA	NA	NA	NA	T	Y	C	T	T	T	T	T	N	C	T	T	T	T	C	C	T	T	C	Y	T	Y	T	C	T	T	C	T	T	C	T	T	T	T	C	T	T	T	Y
S1A_18084861	C/T	1A	18084861	+	NA	NA	NA	NA	NA	NA	T	Y	T	C	C	C	C	T	T	T	C	C	C	C	T	T	C	T	T	T	C	T	C	Y	C	C	T	C	C	T	C	C	C	C	Y	C	C	C	Y
S1A_18085114	C/G	1A	18085114	+	NA	NA	NA	NA	NA	NA	G	S	G	C	C	C	C	G	N	G	C	C	C	C	N	N	C	S	G	G	C	N	C	S	C	C	N	C	C	N	C	C	C	C	N	C	C	C	S
S1A_18085132	A/G	1A	18085132	+	NA	NA	NA	NA	NA	NA	G	R	G	A	A	A	A	G	N	G	A	A	A	A	N	N	A	R	G	G	A	N	A	R	A	A	N	A	A	N	A	A	A	A	N	A	A	A	R
S1A_18085150	A/G	1A	18085150	+	NA	NA	NA	NA	NA	NA	A	R	G	A	A	A	A	A	N	G	A	A	A	A	N	N	A	R	G	G	A	N	A	R	A	A	N	A	A	N	A	A	A	A	N	A	A	A	R
S1A_18085162	G/C	1A	18085162	+	NA	NA	NA	NA	NA	NA	G	S	C	G	G	G	G	G	N	C	G	G	G	G	N	N	G	S	C	C	G	N	G	S	G	G	N	G	G	N	G	G	G	G	N	G	G	G	S
S1A_18085929	A/G	1A	18085929	+	NA	NA	NA	NA	NA	NA	G	A	G	A	A	A	A	G	G	G	A	A	A	A	G	R	A	N	G	G	A	G	A	G	A	A	G	A	A	G	A	A	A	A	R	A	A	A	A
S1A_18461833	C/T	1A	18461833	+	NA	NA	NA	NA	NA	NA	Y	C	C	C	C	C	N	C	C	C	C	C	C	T	C	C	T	Y	C	C	T	C	T	C	N	C	C	C	C	C	C	C	N	C	C	C	T	T	C
S1A_19933430	G/A	1A	19933430	+	NA	NA	NA	NA	NA	NA	A	R	A	G	R	G	G	A	A	A	R	R	G	G	A	A	R	G	A	A	G	N	R	R	G	R	A	A	G	A	N	R	G	G	R	R	G	G	R
S1A_19933458	A/G	1A	19933458	+	NA	NA	NA	NA	NA	NA	A	R	G	A	A	A	A	G	A	A	R	R	A	A	A	G	R	A	G	G	A	N	R	R	A	A	G	G	A	G	N	R	A	A	R	R	A	A	R
S1A_20028899	C/T	1A	20028899	+	NA	NA	NA	NA	NA	NA	C	Y	C	C	C	C	C	Y	C	C	C	C	C	Y	C	N	C	C	C	N	C	C	C	C	C	C	C	C	C	N	C	T	C	C	C	C	C	C	N
S1A_20237407	G/C	1A	20237407	+	NA	NA	NA	NA	NA	NA	S	S	S	S	S	S	S	S	G	G	S	S	S	S	S	S	S	S	S	S	S	S	S	G	S	G	S	S	S	S	S	S	G	G	S	S	G	G	S
S1A_20237445	C/G	1A	20237445	+	NA	NA	NA	NA	NA	NA	C	S	G	C	N	C	C	C	G	G	C	C	C	C	N	G	C	G	G	N	C	G	C	G	C	C	G	C	C	G	C	C	C	N	G	C	N	C	N
S1A_20444255	T/A	1A	20444255	+	NA	NA	NA	NA	NA	NA	W	T	T	T	W	T	T	T	A	N	W	T	T	W	T	T	T	T	T	T	W	T	T	T	T	T	T	T	T	T	T	T	W	T	T	T	T	T	W
S1A_20810714	C/T	1A	20810714	+	NA	NA	NA	NA	NA	NA	N	Y	T	N	C	C	C	C	T	T	C	N	C	C	T	T	C	T	T	T	C	T	C	T	C	C	T	N	N	T	N	N	C	C	N	C	C	N	Y
S1A_20810732	C/T	1A	20810732	+	NA	NA	NA	NA	NA	NA	N	Y	T	N	C	C	C	C	T	T	C	N	C	C	T	T	C	T	T	T	C	T	C	T	C	C	T	N	N	T	N	N	C	C	N	C	C	N	Y
S1A_20886731	G/A	1A	20886731	+	NA	NA	NA	NA	NA	NA	G	G	G	G	G	G	G	G	G	G	A	R	G	G	G	G	G	G	G	G	G	G	G	R	G	G	G	A	A	G	A	G	A	G	R	G	G	N	G
S1A_20886773	A/C	1A	20886773	+	NA	NA	NA	NA	NA	NA	A	M	C	A	A	A	A	A	C	C	A	A	A	A	C	C	A	C	C	C	A	C	A	M	A	A	C	A	A	C	A	A	A	A	M	A	A	N	M
S1A_20898169	G/C	1A	20898169	+	NA	NA	NA	NA	NA	NA	G	G	C	G	G	G	G	G	N	C	G	G	G	G	C	C	G	S	C	C	G	C	G	S	G	G	C	G	G	C	G	G	G	G	C	G	G	G	S
S1A_20936438	C/T	1A	20936438	+	NA	NA	NA	NA	NA	NA	Y	Y	N	C	T	Y	Y	Y	C	N	Y	T	Y	Y	N	N	Y	C	N	N	N	C	Y	C	C	Y	N	C	Y	N	C	Y	C	Y	Y	C	Y	C	Y
S1A_20936454	A/T	1A	20936454	+	NA	NA	NA	NA	NA	NA	W	W	N	A	T	W	W	W	A	N	W	T	W	W	N	N	W	A	N	N	N	A	W	A	A	W	N	A	W	N	A	W	A	W	W	A	W	A	W
S1A_21098843	G/T	1A	21098843	+	NA	NA	NA	NA	NA	NA	G	G	T	G	G	G	G	G	T	T	G	G	G	G	T	T	G	K	T	T	G	T	G	K	G	G	T	G	G	T	G	G	G	G	K	G	G	G	K
S1A_21098850	T/C	1A	21098850	+	NA	NA	NA	NA	NA	NA	Y	Y	C	Y	C	T	Y	T	C	C	T	T	T	T	C	C	C	Y	C	C	T	C	T	Y	T	T	C	T	Y	C	T	T	Y	Y	Y	T	T	Y	Y
S1A_21098869	G/A	1A	21098869	+	NA	NA	NA	NA	NA	NA	G	G	A	G	G	G	G	G	A	A	G	G	G	G	A	A	G	R	A	A	G	A	G	R	G	G	A	G	G	A	G	G	G	G	R	G	G	G	R
S1A_21098872	C/T	1A	21098872	+	NA	NA	NA	NA	NA	NA	Y	C	C	Y	C	C	Y	C	C	C	C	C	C	C	C	C	C	C	C	C	C	C	C	Y	C	C	C	C	Y	C	C	C	Y	Y	C	C	C	Y	C
S1A_21645247	A/G	1A	21645247	+	NA	NA	NA	NA	NA	NA	N	R	G	A	N	A	N	A	G	G	N	A	N	N	G	G	N	G	G	G	A	G	N	R	A	A	G	N	A	G	A	A	N	A	R	A	A	A	G
S1A_21645252	G/A	1A	21645252	+	NA	NA	NA	NA	NA	NA	N	R	G	A	N	A	N	A	G	G	N	G	N	N	G	G	N	G	G	G	A	G	N	R	G	G	G	N	A	G	A	A	N	A	R	A	A	A	G
S1A_21645271	G/T	1A	21645271	+	NA	NA	NA	NA	NA	NA	N	K	T	G	N	G	N	G	T	T	N	G	N	N	T	T	N	T	T	T	G	T	N	K	G	G	T	N	G	T	G	G	N	G	K	G	G	G	T
S1A_22047070	C/G	1A	22047070	+	NA	NA	NA	NA	NA	NA	C	C	G	C	C	C	C	C	G	G	N	C	C	C	G	G	C	G	G	G	G	G	C	G	C	C	G	C	C	G	C	C	C	N	G	C	C	C	G
S1A_22330352	T/C	1A	22330352	+	NA	NA	NA	NA	NA	NA	T	T	C	T	T	T	T	T	Y	T	T	T	T	T	C	C	T	C	C	N	T	C	T	Y	T	T	C	T	T	C	T	T	T	T	T	T	T	T	Y
S1A_22330356	G/A	1A	22330356	+	NA	NA	NA	NA	NA	NA	R	R	G	G	G	R	R	R	R	A	G	R	G	G	G	G	G	G	G	N	G	G	G	G	G	G	G	G	G	G	G	G	G	G	G	G	G	G	R
S1A_22331361	C/T	1A	22331361	+	NA	NA	NA	NA	NA	NA	C	C	T	C	C	C	C	C	T	T	C	C	C	C	T	T	C	Y	T	T	C	T	C	Y	C	C	T	C	C	T	C	C	C	C	Y	C	C	C	Y
S1A_22331367	C/A	1A	22331367	+	NA	NA	NA	NA	NA	NA	C	C	A	C	C	C	C	C	A	A	C	C	C	C	A	A	C	M	A	A	C	A	C	M	C	C	A	C	C	A	C	C	C	C	M	C	C	C	M
S1A_22332581	T/A	1A	22332581	+	NA	NA	NA	NA	NA	NA	T	W	T	W	T	T	W	W	T	T	W	T	T	N	T	N	T	T	T	T	W	T	T	N	T	T	N	T	A	N	T	W	A	T	T	W	N	N	T
S1A_22332621	C/G	1A	22332621	+	NA	NA	NA	NA	NA	NA	S	S	G	S	C	S	C	S	G	G	S	C	C	N	G	N	S	G	G	G	C	G	C	N	C	C	N	G	C	N	C	S	C	C	G	C	N	N	C
S1A_22333178	A/G	1A	22333178	+	NA	NA	NA	NA	NA	NA	R	G	A	R	R	R	R	A	N	A	A	R	R	G	A	A	R	A	A	N	N	A	G	N	R	R	N	G	A	A	G	R	A	R	A	G	A	N	R
S1A_22333218	A/G	1A	22333218	+	NA	NA	NA	NA	NA	NA	A	A	G	A	A	A	A	A	N	G	A	A	A	A	G	G	A	G	G	N	N	G	A	N	A	A	N	A	A	G	A	A	A	A	R	A	A	N	R
S1A_22463422	A/G	1A	22463422	+	NA	NA	NA	NA	NA	NA	A	A	G	A	A	N	A	A	N	G	A	A	N	N	G	G	N	R	G	G	A	R	A	N	A	A	G	A	A	G	N	A	A	A	N	A	N	A	G
S1A_22463455	T/C	1A	22463455	+	NA	NA	NA	NA	NA	NA	T	T	C	T	T	N	T	T	N	C	T	T	N	N	C	C	N	Y	C	C	T	Y	T	N	T	T	C	T	T	C	N	T	T	T	N	T	N	T	C
S1A_22486212	C/T	1A	22486212	+	NA	NA	NA	NA	NA	NA	C	Y	T	C	C	C	C	C	T	T	C	C	C	C	T	T	C	Y	T	N	C	T	C	Y	C	C	T	C	C	T	C	C	C	C	Y	C	C	C	Y
S1A_22535256	A/T	1A	22535256	+	NA	NA	NA	NA	NA	NA	A	W	A	W	W	W	W	A	A	W	W	W	W	W	T	A	W	A	A	A	W	W	A	W	A	W	W	W	W	A	W	W	W	W	W	W	A	A	W
S1A_22535357	T/G	1A	22535357	+	NA	NA	NA	NA	NA	NA	K	K	T	K	T	T	T	K	K	K	K	K	T	T	T	T	K	T	T	T	T	T	K	T	K	T	T	K	K	T	K	K	N	T	K	T	T	T	T
S1A_22535367	A/G	1A	22535367	+	NA	NA	NA	NA	NA	NA	R	R	A	R	A	A	A	R	R	R	R	R	A	A	A	A	R	A	A	A	A	A	R	A	R	A	A	R	R	A	R	R	N	A	R	A	A	A	A
S1A_22535396	G/A	1A	22535396	+	NA	NA	NA	NA	NA	NA	R	R	N	R	N	R	R	R	G	R	R	R	N	G	G	G	R	N	G	G	G	N	A	R	A	G	G	G	R	G	G	R	G	G	G	R	G	G	R
S1A_22535405	C/G	1A	22535405	+	NA	NA	NA	NA	NA	NA	S	S	N	S	N	S	S	S	C	S	S	S	N	C	C	C	S	N	C	C	C	N	G	S	G	C	C	C	S	C	C	S	C	C	C	S	C	C	S
S1A_22535421	A/G	1A	22535421	+	NA	NA	NA	NA	NA	NA	R	R	N	R	N	R	R	R	A	R	R	R	N	A	A	A	R	N	A	A	A	N	G	R	G	A	A	A	R	A	A	R	A	A	A	R	A	A	R
S1A_22597172	G/A	1A	22597172	+	NA	NA	NA	NA	NA	NA	R	N	G	R	R	R	G	G	N	N	G	G	G	R	A	G	G	G	G	G	G	G	G	G	G	G	G	G	G	G	G	G	G	N	G	G	G	R	N
S1A_22598754	C/T	1A	22598754	+	NA	NA	NA	NA	NA	NA	C	Y	C	Y	C	C	C	C	N	N	C	C	Y	C	Y	C	C	C	C	C	C	C	C	C	C	Y	C	C	Y	C	C	C	Y	C	Y	Y	C	C	Y
S1A_22598762	G/A	1A	22598762	+	NA	NA	NA	NA	NA	NA	G	G	G	R	G	R	G	G	N	N	G	G	G	R	R	G	G	A	G	G	G	G	G	G	G	G	G	G	G	G	G	G	G	G	G	G	G	R	G
S1A_22598779	C/T	1A	22598779	+	NA	NA	NA	NA	NA	NA	Y	Y	C	Y	Y	Y	T	T	N	N	Y	Y	Y	Y	C	C	T	C	C	C	Y	C	Y	Y	T	Y	C	Y	Y	C	Y	Y	Y	C	Y	Y	Y	Y	Y
S1A_22598780	G/A	1A	22598780	+	NA	NA	NA	NA	NA	NA	G	G	G	R	G	R	G	G	N	N	G	G	G	R	R	G	G	A	G	G	G	G	G	G	G	G	G	G	G	G	G	G	G	G	G	G	G	R	G
S1A_22598789	C/T	1A	22598789	+	NA	NA	NA	NA	NA	NA	C	Y	C	Y	C	C	C	C	N	N	C	C	Y	C	Y	C	C	C	C	C	C	C	C	C	C	Y	C	C	Y	C	C	C	Y	C	Y	Y	C	C	Y
S1A_22598792	G/A	1A	22598792	+	NA	NA	NA	NA	NA	NA	G	G	R	G	G	G	G	G	N	N	G	G	G	G	G	R	G	G	A	G	G	G	G	G	G	G	R	G	G	R	G	G	G	G	G	G	G	G	G
S1A_22756056	G/A	1A	22756056	+	NA	NA	NA	NA	NA	NA	G	R	N	R	G	R	R	G	G	G	G	R	R	R	A	N	R	G	A	N	G	N	G	G	G	G	N	N	R	N	G	G	G	G	R	R	G	G	G
S1A_22822249	G/T	1A	22822249	+	NA	NA	NA	NA	NA	NA	K	G	N	G	G	N	G	K	G	G	K	G	G	K	G	N	N	G	N	N	K	G	G	G	G	K	N	G	K	N	K	G	K	K	K	G	K	G	G
S1A_23000344	C/A	1A	23000344	+	NA	NA	NA	NA	NA	NA	M	M	C	M	C	M	A	C	C	C	C	M	M	C	C	C	C	C	C	C	C	M	M	C	A	C	N	C	C	C	C	A	C	C	C	A	C	C	C
S1A_23138343	A/G	1A	23138343	+	NA	NA	NA	NA	NA	NA	A	R	A	A	A	A	A	A	A	A	A	A	A	A	R	A	A	G	A	A	A	G	A	R	A	A	A	A	A	A	A	A	A	A	R	A	A	A	R
S1A_23155708	A/G	1A	23155708	+	NA	NA	NA	NA	NA	NA	R	G	A	R	A	N	G	A	A	A	A	G	G	A	A	A	A	R	A	N	A	R	G	A	G	A	A	N	A	A	A	R	A	A	G	G	A	A	R
S1A_23164133	A/G	1A	23164133	+	NA	NA	NA	NA	NA	NA	R	G	N	R	A	A	G	A	A	A	A	A	G	A	G	A	A	R	N	A	A	G	G	G	N	A	A	A	A	A	A	G	N	A	A	G	A	A	R
S1A_23164162	G/A	1A	23164162	+	NA	NA	NA	NA	NA	NA	G	R	N	R	G	G	A	G	G	G	G	G	A	G	G	G	G	G	N	G	G	G	A	G	N	G	G	G	G	G	G	A	N	G	G	A	G	G	G
S1A_23166967	A/T	1A	23166967	+	NA	NA	NA	NA	NA	NA	A	T	A	W	A	A	T	A	A	A	A	W	T	A	T	A	A	T	A	A	A	T	T	A	T	A	A	A	A	A	A	T	A	A	W	T	A	A	T
S1A_23167002	A/G	1A	23167002	+	NA	NA	NA	NA	NA	NA	A	G	A	R	A	A	G	A	A	A	A	R	G	A	G	A	A	G	A	A	A	G	G	A	G	A	A	A	A	A	A	G	A	A	R	G	A	A	G
S1A_23833377	C/T	1A	23833377	+	NA	NA	NA	NA	NA	NA	C	C	C	C	C	C	C	Y	C	Y	N	C	C	C	Y	N	C	Y	C	C	C	C	C	C	Y	C	C	C	C	C	C	C	C	C	C	C	Y	C	C
S1A_23850918	T/G	1A	23850918	+	NA	NA	NA	NA	NA	NA	T	T	N	T	T	G	T	T	N	T	N	T	T	T	T	T	T	T	T	T	G	T	T	N	N	G	T	N	G	T	T	T	G	T	K	T	G	T	G
S1A_24344730	T/C	1A	24344730	+	NA	NA	NA	NA	NA	NA	T	T	T	Y	C	T	T	T	C	C	T	T	T	C	Y	T	C	Y	T	T	T	T	T	T	T	C	T	T	T	T	T	T	T	C	T	T	T	Y	Y
S1A_24344738	G/A	1A	24344738	+	NA	NA	NA	NA	NA	NA	G	G	G	R	A	G	G	G	A	A	G	G	G	A	R	G	A	R	G	G	G	G	G	G	G	A	G	G	G	G	G	G	G	A	G	G	G	R	R
S1A_24352636	C/G	1A	24352636	+	NA	NA	NA	NA	NA	NA	S	G	G	C	C	C	C	N	C	C	C	C	C	C	G	G	C	S	G	G	C	S	C	G	C	C	N	C	C	G	C	C	C	C	S	C	C	C	S
S1A_24396121	G/T	1A	24396121	+	NA	NA	NA	NA	NA	NA	G	G	G	N	T	G	G	G	T	T	G	G	G	T	G	G	T	G	G	G	G	G	G	G	G	T	G	G	G	G	G	G	N	T	G	G	G	G	K
S1A_24396128	G/A	1A	24396128	+	NA	NA	NA	NA	NA	NA	G	G	G	N	A	G	G	G	A	A	G	G	G	A	G	G	A	G	G	G	G	G	G	G	G	A	G	G	G	G	G	G	N	A	G	G	G	G	R
S1A_24545858	G/A	1A	24545858	+	NA	NA	NA	NA	NA	NA	G	G	A	G	N	R	G	R	N	N	G	G	G	A	N	A	N	R	A	N	R	A	G	R	G	N	R	G	R	A	R	R	N	N	R	R	G	R	G
S1A_24545871	T/C	1A	24545871	+	NA	NA	NA	NA	NA	NA	T	T	T	T	N	Y	T	T	N	N	T	T	T	T	N	T	N	T	T	N	Y	T	T	Y	T	N	T	T	Y	T	Y	Y	N	N	Y	Y	T	Y	T
S1A_24561950	G/A	1A	24561950	+	NA	NA	NA	NA	NA	NA	G	R	R	G	G	G	R	G	G	G	G	R	R	G	R	R	G	R	A	R	R	R	R	R	R	G	A	R	G	R	R	R	G	G	R	R	R	G	G
S1A_25289518	G/A	1A	25289518	+	NA	NA	NA	NA	NA	NA	R	G	G	R	A	G	G	G	A	A	G	G	G	A	G	G	A	R	G	G	G	G	G	G	G	A	G	G	G	G	G	G	G	A	G	G	G	R	R
S1A_25289557	C/G	1A	25289557	+	NA	NA	NA	NA	NA	NA	C	G	C	S	C	S	G	C	C	C	G	G	G	C	C	C	C	C	C	C	G	C	G	C	G	C	C	G	G	C	G	G	G	C	C	S	G	S	C
S1A_25545567	G/T	1A	25545567	+	NA	NA	NA	NA	NA	NA	K	G	T	G	G	G	G	G	G	G	G	G	G	G	K	T	G	K	T	T	G	T	G	T	G	G	T	G	G	T	G	G	G	G	K	K	G	G	K
S1A_25807483	C/T	1A	25807483	+	NA	NA	NA	NA	NA	NA	T	Y	T	Y	T	C	C	T	T	T	C	C	C	Y	T	T	T	Y	T	T	C	T	C	Y	C	T	T	C	C	T	C	C	C	T	Y	Y	C	C	T
S1A_25938292	C/T	1A	25938292	+	NA	NA	NA	NA	NA	NA	C	C	C	Y	T	C	C	C	T	T	C	C	C	Y	C	C	T	C	C	C	C	C	C	C	C	T	C	C	C	C	N	C	C	T	C	C	C	C	Y
S1A_26318712	A/C	1A	26318712	+	NA	NA	NA	NA	NA	NA	M	A	C	M	C	A	A	A	N	C	A	N	A	M	C	C	C	M	C	C	A	N	A	C	A	C	C	A	N	C	N	A	A	C	M	M	A	A	C
S1A_26318784	C/T	1A	26318784	+	NA	NA	NA	NA	NA	NA	C	C	T	C	C	C	C	C	C	C	C	C	C	C	N	T	C	T	T	T	Y	T	C	Y	C	C	T	C	N	T	C	C	C	C	Y	Y	C	C	Y
S1A_26488580	T/A	1A	26488580	+	NA	NA	NA	NA	NA	NA	T	T	A	T	N	T	T	T	N	N	T	T	T	T	T	A	N	T	A	A	T	T	T	T	T	N	A	T	T	A	T	T	T	N	T	T	T	T	T
S1A_27055380	C/T	1A	27055380	+	NA	NA	NA	NA	NA	NA	C	C	T	C	C	C	C	C	C	C	C	C	C	C	T	Y	C	Y	T	T	C	T	C	Y	N	C	T	C	N	T	C	C	C	C	Y	C	C	C	Y
S1A_27055383	G/A	1A	27055383	+	NA	NA	NA	NA	NA	NA	G	G	A	G	G	G	G	G	G	G	G	G	G	G	A	R	G	R	A	A	G	A	G	R	N	G	A	G	N	A	G	G	G	G	R	G	G	G	R
S1A_27133038	C/T	1A	27133038	+	NA	NA	NA	NA	NA	NA	Y	Y	T	C	C	C	C	C	C	C	N	C	C	C	T	T	C	T	T	T	C	N	C	T	C	C	T	C	N	N	N	C	N	C	C	Y	C	C	Y
S1A_27257601	T/A	1A	27257601	+	NA	NA	NA	NA	NA	NA	W	T	T	N	A	A	T	A	T	T	A	T	T	T	T	T	A	T	T	T	T	W	T	T	N	T	N	T	A	T	T	T	A	T	W	T	T	T	T
S1A_27318755	G/C	1A	27318755	+	NA	NA	NA	NA	NA	NA	N	G	G	G	G	G	G	G	C	C	G	G	G	C	G	G	N	G	G	G	G	N	G	G	G	C	G	G	G	G	G	G	N	N	G	G	G	G	S
S1A_27327468	C/T	1A	27327468	+	NA	NA	NA	NA	NA	NA	C	C	C	C	C	C	C	C	Y	T	C	C	C	C	C	C	C	C	C	C	C	C	C	C	C	T	C	C	C	C	C	C	C	Y	C	C	C	C	Y
S1A_27327506	C/G	1A	27327506	+	NA	NA	NA	NA	NA	NA	S	C	C	S	G	G	C	G	C	C	G	C	C	G	G	C	G	S	C	C	C	C	C	C	C	C	C	C	G	C	C	C	G	S	S	C	C	S	C
S1A_27512785	G/A	1A	27512785	+	NA	NA	NA	NA	NA	NA	A	G	A	G	G	G	G	A	R	A	G	G	G	A	A	A	G	A	A	A	G	A	G	R	G	A	A	G	G	A	G	G	G	R	R	G	G	R	A
S1A_28370464	C/T	1A	28370464	+	NA	NA	NA	NA	NA	NA	C	C	T	C	C	C	C	C	C	C	C	N	N	N	N	Y	N	N	Y	Y	C	C	C	Y	C	C	N	C	C	N	N	C	C	C	Y	C	C	N	C
S1A_28370465	G/A	1A	28370465	+	NA	NA	NA	NA	NA	NA	G	G	G	G	G	G	G	G	A	A	G	N	N	N	N	G	N	N	G	G	G	G	G	G	G	A	N	G	G	N	N	G	G	R	G	G	G	N	A
S1A_28370483	G/A	1A	28370483	+	NA	NA	NA	NA	NA	NA	G	G	G	G	G	G	G	G	A	A	G	N	N	N	N	G	N	N	G	G	G	G	G	G	G	A	N	G	G	N	N	G	G	R	G	G	G	N	A
S1A_28638693	G/A	1A	28638693	+	NA	NA	NA	NA	NA	NA	G	R	G	R	G	R	G	G	G	G	G	R	G	G	R	G	G	R	G	G	G	R	G	R	G	R	G	G	R	G	N	G	N	G	G	G	G	G	R
S1A_28638702	G/C	1A	28638702	+	NA	NA	NA	NA	NA	NA	G	S	G	S	G	S	G	G	G	G	G	S	G	G	S	G	G	S	G	G	G	S	G	S	G	S	G	G	S	G	N	G	N	G	G	G	G	G	S
S1A_28762153	G/C	1A	28762153	+	NA	NA	NA	NA	NA	NA	C	S	C	G	G	G	G	C	G	G	G	G	G	S	C	C	G	C	C	C	G	C	G	S	G	G	C	G	G	C	G	G	G	G	S	S	G	G	S
S1A_29804996	C/T	1A	29804996	+	NA	NA	NA	NA	NA	NA	C	C	C	T	T	N	C	C	C	N	T	N	C	N	C	C	T	N	C	C	N	T	N	C	C	C	C	C	T	C	C	C	T	C	T	C	T	C	C
S1A_29994090	C/G	1A	29994090	+	NA	NA	NA	NA	NA	NA	S	S	N	S	S	S	S	C	N	C	S	N	S	S	N	C	C	C	C	N	S	C	C	C	C	S	N	C	S	C	C	S	C	S	C	S	C	S	S
S1A_30015422	A/G	1A	30015422	+	NA	NA	NA	NA	NA	NA	A	A	A	R	G	G	A	A	A	A	G	A	A	A	A	A	G	A	A	A	A	G	A	A	A	A	A	A	G	A	A	A	G	R	R	A	G	A	A
S1A_30190358	T/G	1A	30190358	+	NA	NA	NA	NA	NA	NA	K	T	T	T	T	T	T	G	T	T	N	G	G	T	T	T	T	T	T	T	N	N	G	T	N	T	T	G	T	T	G	T	T	T	T	T	T	T	T
S1A_30307305	T/A	1A	30307305	+	NA	NA	NA	NA	NA	NA	A	T	T	T	A	T	T	A	N	N	T	N	A	T	T	T	A	W	T	T	A	W	A	T	A	T	T	A	N	T	N	T	T	T	T	T	A	A	T
S1A_30336738	G/A	1A	30336738	+	NA	NA	NA	NA	NA	NA	G	R	R	G	G	G	A	G	G	N	N	R	G	G	G	R	G	G	R	R	G	N	N	N	N	G	R	R	G	R	G	R	G	R	G	G	G	G	G
S1A_30336747	A/G	1A	30336747	+	NA	NA	NA	NA	NA	NA	R	A	R	A	A	A	A	A	A	N	N	R	R	A	A	A	A	R	A	R	A	N	N	N	N	A	A	R	A	R	A	A	A	A	G	R	A	A	R
S1A_30336760	A/G	1A	30336760	+	NA	NA	NA	NA	NA	NA	R	R	R	G	R	A	A	A	A	N	N	R	R	R	A	A	A	R	A	R	A	N	N	N	N	A	A	R	A	R	A	A	A	A	G	R	A	A	R
S1A_31008906	T/C	1A	31008906	+	NA	NA	NA	NA	NA	NA	Y	T	T	T	C	T	T	C	N	T	T	C	C	C	C	T	C	C	T	T	C	T	C	N	C	T	T	C	Y	T	C	T	T	T	Y	C	N	C	C
S1A_31129130	C/T	1A	31129130	+	NA	NA	NA	NA	NA	NA	C	C	C	N	C	N	C	T	C	N	C	N	T	C	C	C	C	N	C	C	N	C	T	C	T	C	C	T	C	C	T	C	N	C	C	C	T	T	C
S1A_31253377	T/C	1A	31253377	+	NA	NA	NA	NA	NA	NA	T	Y	T	Y	T	T	C	T	C	C	T	T	T	Y	Y	T	T	T	T	T	T	T	T	T	T	C	T	T	T	T	T	C	T	C	T	Y	T	T	Y
S1A_31900176	T/C	1A	31900176	+	NA	NA	NA	NA	NA	NA	T	T	T	T	C	N	T	T	T	T	T	T	T	N	T	T	C	T	T	T	T	T	T	T	T	T	T	T	T	T	T	T	T	T	C	T	C	T	T
S1A_31918096	T/C	1A	31918096	+	NA	NA	NA	NA	NA	NA	C	T	C	Y	T	C	T	T	T	T	C	T	T	T	T	C	T	T	C	C	T	C	T	T	T	T	C	T	C	C	T	T	C	Y	T	T	T	T	T
S1A_31974172	T/A	1A	31974172	+	NA	NA	NA	NA	NA	NA	T	W	T	W	T	T	A	T	W	A	T	T	T	W	T	T	T	T	T	T	T	T	T	T	T	A	T	T	T	T	T	A	T	W	T	A	T	T	W
S1A_31974179	G/A	1A	31974179	+	NA	NA	NA	NA	NA	NA	G	R	G	G	G	G	G	G	G	G	G	G	G	R	R	G	G	A	G	G	G	G	G	R	G	G	G	G	G	G	G	G	G	G	R	G	G	R	R
S1A_31974210	G/A	1A	31974210	+	NA	NA	NA	NA	NA	NA	G	G	G	G	A	G	G	A	R	G	G	A	A	G	R	G	A	G	G	G	A	G	A	G	A	G	G	A	G	G	A	G	G	G	G	G	A	R	G
S1A_32111338	G/A	1A	32111338	+	NA	NA	NA	NA	NA	NA	G	G	G	G	A	G	G	G	G	N	G	G	G	R	G	G	A	R	G	G	G	G	G	G	G	G	G	G	G	N	G	G	G	G	G	G	G	R	G
S1A_32111351	C/T	1A	32111351	+	NA	NA	NA	NA	NA	NA	T	C	T	Y	C	T	C	C	C	N	T	C	C	C	C	T	C	C	T	T	C	T	C	C	C	C	T	C	T	N	C	C	T	T	C	C	C	C	C
S1A_32111371	C/T	1A	32111371	+	NA	NA	NA	NA	NA	NA	C	Y	C	C	C	C	C	C	C	N	C	C	C	C	Y	C	C	Y	C	C	C	C	C	T	C	C	C	C	C	N	C	C	C	C	Y	Y	T	C	Y
S1A_32282119	C/T	1A	32282119	+	NA	NA	NA	NA	NA	NA	N	C	T	N	T	T	C	C	C	C	T	C	C	T	C	T	T	Y	T	N	C	T	C	C	C	C	T	C	T	T	C	C	T	C	C	C	C	C	C
S1A_32282142	T/C	1A	32282142	+	NA	NA	NA	NA	NA	NA	N	T	T	N	T	T	T	C	Y	T	T	C	C	T	C	T	T	Y	T	N	C	T	C	C	C	T	T	C	T	T	C	T	T	T	C	Y	C	C	Y
S1A_32282143	A/G	1A	32282143	+	NA	NA	NA	NA	NA	NA	N	A	A	N	A	A	A	G	R	A	A	G	G	A	G	A	A	R	A	N	G	A	G	G	G	A	A	G	A	A	G	A	A	A	G	R	G	G	R
S1A_32282191	A/G	1A	32282191	+	NA	NA	NA	NA	NA	NA	A	A	A	A	A	A	A	G	A	A	A	G	G	A	R	A	A	R	A	A	G	A	G	R	G	A	A	G	A	A	G	A	A	A	R	R	G	A	R
S1A_32471090	C/T	1A	32471090	+	NA	NA	NA	NA	NA	NA	Y	C	T	C	C	C	C	T	C	C	C	C	C	C	C	T	C	T	T	T	C	N	C	Y	C	C	T	C	C	T	C	C	C	C	N	Y	T	C	T
S1A_32471115	G/A	1A	32471115	+	NA	NA	NA	NA	NA	NA	G	A	G	R	A	G	A	G	A	A	G	G	G	R	G	G	G	G	G	G	G	N	G	G	G	A	G	G	G	G	G	A	G	A	N	R	G	G	G
S1A_32471570	T/C	1A	32471570	+	NA	NA	NA	NA	NA	NA	T	T	T	T	T	T	T	T	Y	Y	T	T	T	T	T	T	T	Y	T	N	T	T	T	T	Y	T	Y	T	T	T	T	T	T	T	T	T	T	Y	T
S1A_32471579	T/C	1A	32471579	+	NA	NA	NA	NA	NA	NA	T	T	T	T	T	T	T	T	Y	Y	T	T	T	T	T	T	T	Y	T	N	T	T	T	T	Y	T	Y	T	T	T	T	T	T	T	T	T	T	Y	T
S1A_32919323	T/C	1A	32919323	+	NA	NA	NA	NA	NA	NA	Y	Y	T	C	T	Y	Y	T	Y	C	T	N	T	T	T	T	Y	T	T	T	N	Y	N	T	C	Y	T	N	Y	N	N	Y	Y	C	Y	Y	T	Y	Y
S1A_32919326	A/T	1A	32919326	+	NA	NA	NA	NA	NA	NA	W	W	A	T	A	W	W	A	W	T	A	N	A	A	A	A	W	A	A	A	N	W	N	A	T	W	A	N	W	N	N	W	W	T	W	W	A	W	W
S1A_33219514	C/T	1A	33219514	+	NA	NA	NA	NA	NA	NA	C	T	C	Y	T	C	T	C	T	T	C	Y	T	Y	C	C	C	C	C	C	C	C	Y	C	T	T	C	C	C	C	C	T	C	Y	C	T	C	Y	Y
S1A_33398415	G/A	1A	33398415	+	NA	NA	NA	NA	NA	NA	G	G	A	G	G	G	G	G	G	G	G	G	G	G	G	A	G	G	A	A	G	G	G	G	G	G	A	G	G	A	G	G	G	G	G	G	G	G	G
S1A_33866679	G/C	1A	33866679	+	NA	NA	NA	NA	NA	NA	N	G	S	G	G	G	G	G	N	G	N	G	G	G	N	S	G	G	S	S	G	N	G	G	G	G	C	N	N	S	G	G	G	G	G	G	G	G	G
S1A_34851632	T/G	1A	34851632	+	NA	NA	NA	NA	NA	NA	G	T	T	T	G	T	T	T	T	T	T	K	G	T	T	T	T	T	T	N	T	G	G	T	G	T	T	T	T	T	T	T	T	T	T	T	T	G	N
S1A_34979346	A/G	1A	34979346	+	NA	NA	NA	NA	NA	NA	R	A	A	A	N	A	A	A	G	A	A	A	G	A	A	A	A	A	A	A	A	G	G	A	G	A	A	A	A	A	A	N	A	A	A	A	A	R	A
S1A_35112952	A/G	1A	35112952	+	NA	NA	NA	NA	NA	NA	R	A	A	A	G	A	A	A	A	A	A	R	G	A	A	A	A	A	A	A	A	G	G	A	G	A	A	A	A	A	A	A	A	A	A	A	A	R	A
S1A_35507346	G/A	1A	35507346	+	NA	NA	NA	NA	NA	NA	G	G	G	G	G	G	G	G	R	G	G	G	A	G	G	G	G	G	G	G	G	N	A	G	A	G	G	G	G	G	G	G	N	G	G	G	G	R	G
S1A_35530415	C/T	1A	35530415	+	NA	NA	NA	NA	NA	NA	C	N	C	C	T	C	C	C	N	C	C	C	T	C	C	C	C	C	C	C	C	T	N	C	T	C	N	C	C	C	C	C	C	C	C	C	C	T	C
S1A_37489946	C/T	1A	37489946	+	NA	NA	NA	NA	NA	NA	C	C	T	C	C	C	C	N	C	C	C	C	C	C	N	T	C	Y	T	T	C	C	C	Y	C	C	T	C	C	T	C	C	C	C	Y	C	N	C	C
S1A_37489975	G/A	1A	37489975	+	NA	NA	NA	NA	NA	NA	G	G	A	G	G	G	G	N	G	G	G	R	A	A	R	A	G	A	A	A	G	G	A	G	A	G	A	N	G	A	G	G	G	G	N	R	N	A	R
S1A_37507066	A/G	1A	37507066	+	NA	NA	NA	NA	NA	NA	A	A	A	A	A	A	A	A	A	A	A	G	G	G	A	A	A	R	A	A	A	A	G	A	N	A	A	N	A	A	A	A	A	R	A	A	A	G	A
S1A_37507495	C/G	1A	37507495	+	NA	NA	NA	NA	NA	NA	C	C	N	C	C	N	C	C	C	C	C	S	G	G	C	C	C	C	C	C	C	C	G	C	G	C	C	C	C	C	C	C	N	G	S	C	C	G	C
S1A_38718101	T/C	1A	38718101	+	NA	NA	NA	NA	NA	NA	Y	T	T	T	T	T	T	T	T	T	T	T	C	Y	T	T	T	Y	T	T	T	C	C	N	C	T	T	T	T	T	T	T	T	T	T	T	T	C	T
S1A_38732701	C/G	1A	38732701	+	NA	NA	NA	NA	NA	NA	S	C	C	S	C	S	C	S	S	C	S	C	C	C	C	C	C	C	C	C	C	C	S	S	S	C	N	C	S	C	C	C	C	C	C	C	C	C	S
S1A_38732703	C/G	1A	38732703	+	NA	NA	NA	NA	NA	NA	S	C	C	S	C	S	C	S	S	C	S	C	C	C	C	C	C	C	C	C	C	C	S	S	S	C	N	C	S	C	C	C	C	C	C	C	C	C	S
S1A_38732707	T/A	1A	38732707	+	NA	NA	NA	NA	NA	NA	W	T	T	W	T	W	T	W	W	T	W	T	T	T	T	T	T	T	T	T	T	T	W	W	W	T	N	T	W	T	T	T	T	T	T	T	T	T	W
S1A_39183252	C/T	1A	39183252	+	NA	NA	NA	NA	NA	NA	C	C	T	C	C	C	C	T	C	C	N	C	C	C	N	T	C	T	T	T	C	C	C	Y	C	C	T	C	C	T	C	C	C	C	T	Y	T	C	Y
S1A_39183260	A/T	1A	39183260	+	NA	NA	NA	NA	NA	NA	T	A	A	A	A	A	A	A	A	A	N	A	A	A	N	A	A	A	A	A	A	T	A	A	A	A	A	A	A	A	A	A	A	A	A	A	A	W	A
S1A_39183276	T/C	1A	39183276	+	NA	NA	NA	NA	NA	NA	C	T	C	T	T	T	T	C	T	T	N	T	T	T	N	C	T	C	C	C	T	C	T	Y	T	T	C	T	T	C	T	T	T	T	C	Y	C	Y	Y
S1A_39183294	T/G	1A	39183294	+	NA	NA	NA	NA	NA	NA	T	T	G	T	T	T	T	G	T	T	N	T	T	T	N	G	T	G	G	G	T	T	T	K	T	T	G	T	T	G	T	T	T	T	G	K	G	T	K
S1A_39183475	G/A	1A	39183475	+	NA	NA	NA	NA	NA	NA	R	G	G	G	G	G	G	G	G	G	G	G	G	G	G	G	G	G	G	G	G	A	G	G	G	G	G	G	G	G	G	G	G	G	G	G	G	R	G
S1A_39410454	T/C	1A	39410454	+	NA	NA	NA	NA	NA	NA	Y	T	C	T	T	T	T	C	T	N	T	T	T	T	Y	C	T	Y	C	C	T	T	T	C	T	T	C	T	T	C	T	T	T	T	Y	T	C	T	T
S1A_39513052	C/T	1A	39513052	+	NA	NA	NA	NA	NA	NA	C	Y	C	T	T	Y	Y	C	Y	Y	T	Y	Y	T	T	C	T	Y	C	C	Y	C	Y	Y	Y	T	C	Y	T	C	Y	Y	T	T	Y	Y	C	Y	Y
S1A_39513064	A/G	1A	39513064	+	NA	NA	NA	NA	NA	NA	R	R	R	A	A	R	R	R	R	R	A	R	R	A	A	R	A	A	R	R	R	R	R	A	R	A	R	R	A	R	R	R	A	A	A	R	R	R	A
S1A_39652806	C/T	1A	39652806	+	NA	NA	NA	NA	NA	NA	Y	Y	T	C	C	C	C	T	C	C	C	C	C	C	T	T	C	Y	T	T	C	C	C	Y	C	C	T	N	C	N	C	C	C	C	Y	C	T	C	Y
S1A_39804540	T/C	1A	39804540	+	NA	NA	NA	NA	NA	NA	C	C	C	T	T	T	T	C	T	T	T	T	T	N	Y	C	T	C	C	C	T	N	T	C	T	T	C	T	T	C	N	T	T	T	C	Y	C	T	Y
S1A_40498783	T/G	1A	40498783	+	NA	NA	NA	NA	NA	NA	N	K	G	T	T	T	T	G	T	T	T	T	T	T	N	G	T	K	G	G	T	K	T	K	T	T	G	T	T	G	T	N	T	T	N	K	G	T	K
S1A_40498796	A/G	1A	40498796	+	NA	NA	NA	NA	NA	NA	N	R	G	A	A	A	A	G	A	A	A	A	A	A	N	G	A	R	G	G	A	R	A	R	A	A	G	A	A	G	A	N	A	A	N	R	G	A	R
S1A_40899973	A/G	1A	40899973	+	NA	NA	NA	NA	NA	NA	R	A	G	A	A	A	A	G	A	A	A	A	A	A	G	G	A	R	G	G	A	A	A	R	A	A	G	A	A	G	A	A	A	A	R	R	G	A	G
S1A_40899986	G/T	1A	40899986	+	NA	NA	NA	NA	NA	NA	K	G	T	G	G	G	G	T	G	G	G	G	G	G	T	T	G	K	T	T	G	G	G	K	G	G	T	G	G	T	G	G	G	G	K	K	T	G	T
S1A_41072834	G/T	1A	41072834	+	NA	NA	NA	NA	NA	NA	G	N	K	N	G	G	G	K	N	N	G	G	G	N	K	T	G	K	K	T	G	N	N	T	N	G	K	G	G	K	G	G	G	G	K	K	G	G	K
S1A_41072835	A/T	1A	41072835	+	NA	NA	NA	NA	NA	NA	A	N	W	N	A	A	A	W	N	N	A	A	A	N	W	T	A	W	W	T	A	N	N	T	N	A	W	A	A	W	A	A	A	A	W	W	A	A	W
S1A_41368108	G/T	1A	41368108	+	NA	NA	NA	NA	NA	NA	G	G	G	G	G	G	G	G	K	G	G	T	T	K	G	G	G	K	G	G	G	G	T	G	T	G	G	G	G	G	G	G	G	G	G	G	G	K	G
S1A_41744193	G/T	1A	41744193	+	NA	NA	NA	NA	NA	NA	K	G	T	G	G	G	G	T	G	G	G	G	G	G	K	T	G	K	T	T	G	T	G	T	G	G	T	G	G	T	G	G	G	G	K	K	T	G	K
S1A_41906034	C/T	1A	41906034	+	NA	NA	NA	NA	NA	NA	C	C	C	C	C	C	C	C	C	C	C	Y	C	C	C	C	Y	Y	C	C	C	C	C	C	Y	C	C	C	C	C	C	C	C	C	C	C	C	C	C
S1A_41906853	G/A	1A	41906853	+	NA	NA	NA	NA	NA	NA	G	G	G	G	N	G	N	G	R	G	G	R	R	R	G	G	R	G	G	G	G	G	G	G	R	G	N	G	G	G	G	G	G	G	G	G	G	G	G
S1A_41919621	C/G	1A	41919621	+	NA	NA	NA	NA	NA	NA	C	C	C	C	C	C	C	C	C	C	C	C	S	S	C	C	S	S	C	C	C	C	S	C	S	C	C	C	C	C	C	C	C	C	C	C	C	S	C
S1A_41919623	C/T	1A	41919623	+	NA	NA	NA	NA	NA	NA	T	Y	T	C	C	C	C	T	C	C	C	C	C	C	Y	T	C	Y	T	T	C	T	C	Y	C	C	T	C	C	T	C	C	C	C	Y	C	T	C	Y
S1A_42100559	C/T	1A	42100559	+	NA	NA	NA	NA	NA	NA	C	C	T	C	C	N	C	C	C	C	C	C	C	N	C	T	C	C	T	T	C	C	C	C	C	C	N	N	N	T	C	C	C	C	C	C	C	C	C
S1A_42151448	G/A	1A	42151448	+	NA	NA	NA	NA	NA	NA	G	G	G	G	G	G	G	G	R	G	G	R	A	R	G	G	A	R	G	G	G	G	A	G	A	G	G	G	G	G	G	G	G	G	G	G	G	R	G
S1A_42254664	T/C	1A	42254664	+	NA	NA	NA	NA	NA	NA	Y	Y	Y	Y	T	Y	C	Y	Y	Y	N	Y	Y	Y	T	T	C	T	Y	T	C	T	C	T	Y	T	Y	Y	T	T	Y	Y	T	T	C	Y	Y	Y	T
S1A_42254687	C/A	1A	42254687	+	NA	NA	NA	NA	NA	NA	M	M	M	M	C	M	A	M	M	M	N	M	M	M	C	C	A	C	M	C	A	C	A	C	M	C	M	M	C	C	M	M	C	C	A	M	M	M	C
S1A_42254698	G/C	1A	42254698	+	NA	NA	NA	NA	NA	NA	S	S	S	S	G	S	C	S	S	S	N	S	S	S	G	G	C	G	S	G	C	G	C	G	S	G	S	S	G	G	S	S	G	G	C	S	S	S	G
S1A_43579217	C/G	1A	43579217	+	NA	NA	NA	NA	NA	NA	C	S	G	C	C	C	C	G	C	C	C	C	C	C	G	G	C	C	G	G	C	G	C	N	C	G	G	C	C	G	C	C	N	C	C	S	G	C	G
S1A_44364910	A/G	1A	44364910	+	NA	NA	NA	NA	NA	NA	A	R	R	A	A	R	A	R	R	A	A	R	R	R	A	R	A	A	G	R	R	A	A	A	A	A	G	A	A	R	R	R	A	A	A	A	R	R	A
S1A_44364917	C/T	1A	44364917	+	NA	NA	NA	NA	NA	NA	C	Y	Y	C	C	Y	C	Y	Y	C	C	Y	Y	Y	C	Y	C	C	T	Y	Y	C	C	C	C	C	T	C	C	Y	Y	Y	C	C	C	C	Y	Y	C
S1A_44712927	G/C	1A	44712927	+	NA	NA	NA	NA	NA	NA	S	G	C	G	G	G	G	C	G	G	G	G	G	G	S	C	G	C	C	C	G	G	G	C	G	G	C	G	G	C	G	G	N	G	G	S	C	G	S
S1A_44980981	T/C	1A	44980981	+	NA	NA	NA	NA	NA	NA	T	T	C	T	T	T	T	C	T	T	T	T	T	T	Y	C	T	Y	C	C	T	N	T	Y	N	C	C	T	T	C	T	T	T	T	Y	Y	C	T	C
S1A_45540979	G/A	1A	45540979	+	NA	NA	NA	NA	NA	NA	R	G	A	G	G	G	G	A	G	G	G	G	G	G	A	A	G	G	A	A	G	A	G	R	G	A	A	G	G	A	G	G	G	G	A	R	A	G	A
S1A_45588946	T/C	1A	45588946	+	NA	NA	NA	NA	NA	NA	T	C	T	C	C	C	C	T	Y	C	C	Y	T	Y	Y	T	T	T	T	T	C	T	T	T	T	T	T	C	C	T	C	C	C	C	Y	C	T	Y	T
S1A_46222270	A/G	1A	46222270	+	NA	NA	NA	NA	NA	NA	R	R	A	R	R	R	R	A	R	R	R	R	G	R	A	A	R	R	A	A	R	G	G	R	G	A	A	A	R	A	R	R	R	R	A	R	A	G	A
S1A_46222311	C/A	1A	46222311	+	NA	NA	NA	NA	NA	NA	M	C	C	C	C	C	C	C	M	C	C	M	A	A	C	C	C	C	C	C	C	A	A	N	A	C	C	C	C	C	C	C	C	C	C	C	C	M	C
S1A_46245745	C/A	1A	46245745	+	NA	NA	NA	NA	NA	NA	M	A	A	C	C	C	C	A	C	C	C	C	C	C	N	A	N	A	A	A	N	C	N	M	C	A	A	C	C	A	C	C	N	C	M	C	N	C	A
S1A_46441900	C/A	1A	46441900	+	NA	NA	NA	NA	NA	NA	M	C	A	C	C	C	C	A	N	C	C	C	N	C	A	A	C	A	A	A	C	C	N	M	C	A	A	C	C	N	C	C	C	C	A	M	A	C	A
S1A_46442544	G/A	1A	46442544	+	NA	NA	NA	NA	NA	NA	R	G	G	G	G	G	G	G	G	G	G	G	N	N	G	G	G	G	G	G	G	A	N	G	N	G	G	G	G	G	G	G	G	G	G	G	G	G	G
S1A_46442615	A/G	1A	46442615	+	NA	NA	NA	NA	NA	NA	A	R	A	R	N	R	R	A	R	R	G	R	A	R	A	A	R	A	A	A	R	A	A	A	A	A	A	G	G	A	R	R	G	G	R	A	A	R	A
S1A_47521369	T/C	1A	47521369	+	NA	NA	NA	NA	NA	NA	Y	T	T	T	T	T	T	T	T	T	T	Y	C	C	T	T	T	Y	T	T	T	T	C	T	C	T	T	T	T	T	T	T	T	T	T	T	T	C	T
S1A_47581359	T/A	1A	47581359	+	NA	NA	NA	NA	NA	NA	W	T	T	T	T	T	T	T	N	T	T	W	A	W	T	N	T	T	T	T	T	A	A	T	A	T	T	T	T	T	N	T	T	T	N	T	T	A	T
S1A_47805392	C/T	1A	47805392	+	NA	NA	NA	NA	NA	NA	Y	Y	T	C	C	C	C	T	C	C	C	C	C	C	Y	T	C	T	T	T	C	C	C	Y	C	C	T	C	C	T	C	C	C	C	Y	C	T	C	C
S1A_48196905	A/G	1A	48196905	+	NA	NA	NA	NA	NA	NA	A	A	A	A	A	A	A	N	N	N	A	A	A	A	N	R	R	A	N	A	R	R	A	N	A	R	A	N	A	G	A	R	A	R	A	R	A	A	A
S1A_48769407	T/A	1A	48769407	+	NA	NA	NA	NA	NA	NA	W	T	T	T	T	T	T	T	T	T	T	N	A	W	T	T	T	W	T	T	T	A	A	N	A	T	T	T	T	T	T	T	T	T	T	T	T	W	T
S1A_49153543	G/T	1A	49153543	+	NA	NA	NA	NA	NA	NA	N	T	G	T	T	N	T	G	N	K	T	T	G	K	K	G	T	G	G	G	T	K	T	G	G	G	G	G	T	G	G	T	T	T	G	K	G	G	G
S1A_49245501	A/C	1A	49245501	+	NA	NA	NA	NA	NA	NA	C	M	M	A	A	A	A	C	A	A	A	A	C	M	C	C	M	C	C	C	A	N	M	C	C	M	C	C	A	C	C	A	A	A	C	M	C	M	C
S1A_49281757	T/C	1A	49281757	+	NA	NA	NA	NA	NA	NA	N	T	T	T	T	T	T	T	Y	N	T	T	N	C	T	T	T	N	T	T	T	T	C	T	C	C	T	T	T	T	T	T	N	T	T	T	T	C	C
S1A_49324667	C/T	1A	49324667	+	NA	NA	NA	NA	NA	NA	Y	Y	T	C	C	C	C	T	C	C	C	C	C	C	Y	T	C	Y	T	T	C	T	C	Y	C	C	T	T	C	T	T	C	C	C	Y	Y	T	C	Y
S1A_49347009	A/G	1A	49347009	+	NA	NA	NA	NA	NA	NA	G	A	G	A	A	A	A	G	A	A	A	A	A	A	R	G	A	R	G	G	A	G	A	R	A	A	G	G	A	G	G	A	A	A	R	R	G	A	R
S1A_49891048	C/T	1A	49891048	+	NA	NA	NA	NA	NA	NA	C	C	C	N	T	T	C	C	T	T	T	C	C	T	N	N	T	C	C	C	T	C	C	N	C	C	C	C	T	C	C	C	T	T	C	C	C	C	C
S1A_50142962	C/T	1A	50142962	+	NA	NA	NA	NA	NA	NA	C	C	Y	Y	N	Y	Y	T	Y	Y	C	C	Y	Y	Y	Y	Y	Y	C	Y	T	Y	Y	Y	N	Y	Y	Y	Y	Y	Y	Y	C	Y	Y	Y	Y	Y	Y
S1A_50142993	T/C	1A	50142993	+	NA	NA	NA	NA	NA	NA	C	T	Y	T	N	T	T	T	T	T	T	Y	T	T	Y	Y	T	Y	C	Y	T	Y	T	Y	N	T	Y	Y	T	Y	Y	T	T	T	Y	T	Y	Y	T
S1A_50281754	A/C	1A	50281754	+	NA	NA	NA	NA	NA	NA	C	A	C	A	M	A	A	N	M	M	A	A	A	A	N	C	A	C	C	C	A	C	A	N	A	A	C	N	A	C	C	A	A	A	M	M	N	A	M
S1A_50283429	T/A	1A	50283429	+	NA	NA	NA	NA	NA	NA	W	W	A	T	T	T	T	N	W	W	N	T	T	T	A	A	T	A	A	A	T	A	T	W	T	T	A	N	T	A	N	T	T	T	N	T	N	T	W
S1A_50776308	G/A	1A	50776308	+	NA	NA	NA	NA	NA	NA	R	R	A	G	G	G	N	A	G	N	G	R	N	N	R	A	N	R	A	A	G	A	R	R	G	G	A	A	G	N	A	G	N	G	N	G	A	G	R
S1A_50833339	G/A	1A	50833339	+	NA	NA	NA	NA	NA	NA	R	G	G	R	R	R	G	N	G	G	R	N	N	G	G	G	R	G	G	G	G	R	N	G	N	G	G	G	R	G	G	G	R	G	R	G	R	N	G
S1A_50833342	C/T	1A	50833342	+	NA	NA	NA	NA	NA	NA	Y	Y	T	C	C	C	C	N	C	C	C	N	N	C	T	T	C	T	T	T	C	Y	N	T	N	C	T	T	C	T	T	C	C	C	Y	Y	Y	N	Y
S1A_50833362	C/T	1A	50833362	+	NA	NA	NA	NA	NA	NA	C	C	C	Y	C	Y	C	N	C	C	Y	N	N	C	C	C	C	C	C	C	C	C	N	C	N	C	C	C	Y	C	C	C	Y	C	Y	C	C	N	C
S1A_50846384	G/A	1A	50846384	+	NA	NA	NA	NA	NA	NA	G	R	R	G	R	G	R	G	R	R	G	A	G	G	G	G	G	R	G	R	G	G	N	R	G	G	G	R	R	R	G	R	G	R	R	G	G	G	G
S1A_50846396	G/A	1A	50846396	+	NA	NA	NA	NA	NA	NA	G	R	R	G	R	G	R	G	R	R	G	A	G	G	G	G	G	R	G	R	G	G	N	R	G	G	G	R	R	R	G	R	G	R	R	G	G	G	G
S1A_50846412	G/C	1A	50846412	+	NA	NA	NA	NA	NA	NA	G	S	S	G	S	G	S	G	S	S	G	C	G	G	G	G	G	S	G	S	G	G	N	S	G	G	G	S	S	S	G	S	G	S	S	G	G	G	G
S1A_50931450	G/C	1A	50931450	+	NA	NA	NA	NA	NA	NA	G	S	G	S	G	S	S	S	G	G	G	G	S	S	G	G	S	S	G	G	S	G	S	G	C	G	G	G	G	G	G	S	S	G	G	S	G	S	G
S1A_50931464	T/C	1A	50931464	+	NA	NA	NA	NA	NA	NA	T	Y	T	Y	T	Y	Y	Y	T	T	T	T	Y	Y	T	T	Y	Y	T	T	Y	T	Y	T	C	T	T	T	T	T	T	Y	Y	T	T	Y	T	Y	T
S1A_50931479	T/C	1A	50931479	+	NA	NA	NA	NA	NA	NA	T	Y	T	Y	T	Y	Y	Y	T	T	T	T	Y	Y	T	T	Y	Y	T	T	Y	T	Y	T	C	T	T	T	T	T	T	Y	Y	T	T	Y	T	Y	T
S1A_51204647	G/C	1A	51204647	+	NA	NA	NA	NA	NA	NA	S	S	G	S	G	C	S	G	S	S	G	G	G	S	S	G	S	S	G	G	S	G	S	G	S	S	G	N	S	G	G	G	C	S	S	S	G	G	S
S1A_51204664	T/C	1A	51204664	+	NA	NA	NA	NA	NA	NA	Y	Y	Y	Y	Y	T	Y	Y	Y	Y	Y	Y	Y	Y	Y	Y	Y	Y	Y	Y	Y	C	Y	Y	Y	Y	Y	N	Y	Y	Y	Y	T	T	Y	Y	Y	Y	Y
S1A_51204670	C/T	1A	51204670	+	NA	NA	NA	NA	NA	NA	Y	Y	C	Y	Y	C	Y	C	Y	Y	Y	Y	Y	Y	Y	C	Y	C	C	C	Y	T	C	C	Y	Y	C	N	Y	C	C	Y	C	C	C	Y	C	C	Y
S1A_51204675	G/A	1A	51204675	+	NA	NA	NA	NA	NA	NA	R	R	R	R	R	G	R	R	R	R	R	R	R	R	R	R	R	R	R	R	R	A	R	R	R	R	R	N	R	R	R	R	G	G	R	R	R	R	R
S1A_51204682	C/G	1A	51204682	+	NA	NA	NA	NA	NA	NA	S	S	S	S	S	C	S	S	S	S	S	S	S	S	S	S	S	S	S	S	S	G	S	S	S	S	S	N	S	S	S	S	C	C	S	S	S	S	S
S1A_51347034	C/G	1A	51347034	+	NA	NA	NA	NA	NA	NA	S	C	G	C	C	C	C	G	C	C	C	N	C	C	C	G	C	S	G	G	C	S	C	S	C	C	G	N	C	G	N	C	C	C	S	C	N	C	C
S1A_52532729	T/A	1A	52532729	+	NA	NA	NA	NA	NA	NA	T	T	N	T	T	T	T	N	T	T	T	T	A	W	T	N	T	A	N	N	T	N	T	N	A	T	N	T	T	N	T	T	T	T	T	T	T	A	T
S1A_53437811	A/T	1A	53437811	+	NA	NA	NA	NA	NA	NA	T	A	T	A	A	A	A	T	N	A	A	A	A	A	A	T	A	T	T	T	N	N	A	T	A	A	T	A	A	T	A	A	A	A	T	A	A	A	W
S1A_53455750	C/G	1A	53455750	+	NA	NA	NA	NA	NA	NA	C	S	S	S	C	S	S	S	S	C	G	S	C	C	C	S	S	C	S	S	C	C	S	S	S	C	G	S	S	S	S	S	C	C	S	S	C	C	S
S1A_53455767	G/C	1A	53455767	+	NA	NA	NA	NA	NA	NA	G	S	S	S	G	S	S	S	S	G	C	S	G	G	G	S	S	G	S	S	G	G	S	S	S	G	C	S	S	S	S	S	G	G	S	S	G	G	S
S1A_53455793	A/G	1A	53455793	+	NA	NA	NA	NA	NA	NA	A	R	R	R	A	R	R	R	R	A	G	R	A	A	A	R	R	A	R	R	A	A	R	R	R	A	G	R	R	R	R	R	A	A	R	R	A	A	R
S1A_53850988	A/T	1A	53850988	+	NA	NA	NA	NA	NA	NA	A	A	A	A	W	A	N	A	A	A	N	A	A	A	A	A	A	W	A	A	A	A	A	A	A	W	A	N	N	A	A	A	N	W	N	A	A	N	W
S1A_53850991	A/T	1A	53850991	+	NA	NA	NA	NA	NA	NA	A	A	A	A	W	A	N	A	A	A	N	A	A	A	A	A	A	W	A	A	A	A	A	A	A	W	A	N	N	A	A	A	N	W	N	A	A	N	W
S1A_53903789	A/G	1A	53903789	+	NA	NA	NA	NA	NA	NA	R	A	G	A	A	A	A	G	A	A	A	A	A	A	A	G	A	G	G	G	A	R	R	G	A	A	G	A	A	G	A	A	A	A	R	A	A	R	R
S1A_54460442	G/C	1A	54460442	+	NA	NA	NA	NA	NA	NA	C	G	C	G	G	G	G	C	G	G	G	G	G	G	C	C	G	C	C	C	G	C	S	S	G	G	C	C	G	C	C	G	G	G	C	S	C	S	S
S1A_57212799	T/C	1A	57212799	+	NA	NA	NA	NA	NA	NA	T	T	T	T	N	T	T	T	T	T	T	T	T	T	Y	T	T	T	T	T	T	T	T	T	T	T	T	C	T	T	C	T	T	T	Y	T	C	T	T
S1A_57292908	A/G	1A	57292908	+	NA	NA	NA	NA	NA	NA	A	A	A	A	A	A	N	A	A	A	A	A	A	A	G	A	A	A	A	N	A	A	A	A	A	A	A	G	A	A	G	A	A	A	R	R	G	A	A
S1A_57292910	G/A	1A	57292910	+	NA	NA	NA	NA	NA	NA	G	G	G	G	G	G	N	G	G	G	G	G	G	G	A	G	G	G	G	N	G	G	G	G	G	G	G	A	G	G	A	G	G	G	R	R	A	G	G
S1A_57640015	C/T	1A	57640015	+	NA	NA	NA	NA	NA	NA	C	C	C	C	N	C	C	C	C	C	C	C	C	C	Y	C	C	C	C	C	C	C	C	C	C	C	C	T	C	C	T	C	C	C	C	Y	T	C	C
S1A_57640068	C/T	1A	57640068	+	NA	NA	NA	NA	NA	NA	C	C	C	C	C	C	C	C	C	C	C	C	C	C	T	C	C	C	C	C	C	C	C	C	C	C	C	T	C	C	T	C	C	C	Y	C	T	C	C
S1A_58188157	G/A	1A	58188157	+	NA	NA	NA	NA	NA	NA	G	G	G	G	G	G	G	G	G	G	G	G	G	G	R	G	G	G	N	G	G	G	G	G	G	G	G	A	G	G	A	G	G	G	R	R	A	G	G
S1A_58299626	C/A	1A	58299626	+	NA	NA	NA	NA	NA	NA	M	M	M	M	N	A	C	N	C	C	N	C	C	C	N	A	C	M	C	M	C	C	A	N	A	C	N	A	A	A	M	M	C	C	A	C	N	C	M
S1A_58299631	A/G	1A	58299631	+	NA	NA	NA	NA	NA	NA	R	R	R	R	N	G	A	N	A	A	N	A	A	A	N	G	A	R	A	R	A	A	G	N	G	A	N	G	G	G	R	R	A	A	G	A	N	A	R
S1A_58629275	C/G	1A	58629275	+	NA	NA	NA	NA	NA	NA	C	S	C	S	S	C	S	S	C	C	C	S	C	C	C	S	C	C	C	G	C	C	N	C	S	C	C	C	S	S	C	S	S	C	S	S	C	S	C
S1A_58629287	A/G	1A	58629287	+	NA	NA	NA	NA	NA	NA	A	R	A	R	R	A	R	R	A	A	A	R	A	A	A	R	A	A	A	G	A	A	N	A	R	A	A	A	R	R	A	R	R	A	R	R	A	R	A
S1A_58629299	G/C	1A	58629299	+	NA	NA	NA	NA	NA	NA	G	S	G	S	S	G	S	S	G	G	G	S	G	G	G	S	G	G	G	C	G	G	N	G	S	G	G	G	S	S	G	S	S	G	S	S	G	S	G
S1A_58713753	A/G	1A	58713753	+	NA	NA	NA	NA	NA	NA	A	A	A	A	A	N	A	A	N	A	A	A	A	A	G	A	A	A	A	A	A	A	N	A	A	N	A	G	A	A	G	A	A	A	A	R	G	A	A
S1A_60956687	G/A	1A	60956687	+	NA	NA	NA	NA	NA	NA	R	R	R	G	G	G	R	G	G	G	N	G	G	G	G	R	G	G	R	R	G	G	G	G	G	G	G	R	G	R	R	R	G	G	R	R	G	G	G
S1A_61088948	T/C	1A	61088948	+	NA	NA	NA	NA	NA	NA	C	T	C	T	Y	T	T	C	T	T	T	N	T	T	T	N	T	N	C	C	T	T	T	C	N	T	C	T	T	C	T	T	T	T	C	T	T	T	Y
S1A_61089001	C/T	1A	61089001	+	NA	NA	NA	NA	NA	NA	C	C	C	C	C	C	C	C	Y	C	C	Y	C	C	C	Y	C	C	C	C	C	C	C	C	C	C	C	C	C	C	C	C	N	C	C	C	C	C	C
S1A_61089003	A/G	1A	61089003	+	NA	NA	NA	NA	NA	NA	A	A	A	A	A	A	A	A	R	A	A	R	R	A	A	R	A	A	A	A	A	A	A	R	A	A	A	A	A	A	A	A	N	A	A	A	A	A	A
S1A_61089019	G/A	1A	61089019	+	NA	NA	NA	NA	NA	NA	G	G	G	G	G	G	G	G	R	G	G	R	G	G	G	G	G	G	G	G	G	G	G	G	G	G	G	G	G	G	G	G	N	G	G	G	G	G	G
S1A_62010013	C/A	1A	62010013	+	NA	NA	NA	NA	NA	NA	A	C	N	C	M	C	C	A	N	C	C	C	A	M	C	A	C	A	A	A	C	N	M	A	N	C	N	C	C	A	C	C	C	C	M	C	C	C	A
S1A_64584219	T/C	1A	64584219	+	NA	NA	NA	NA	NA	NA	T	Y	N	Y	T	T	Y	T	N	C	T	T	Y	T	T	T	T	C	T	N	T	N	T	T	Y	Y	N	N	T	T	T	T	T	T	T	T	Y	Y	T
S1A_64851907	T/G	1A	64851907	+	NA	NA	NA	NA	NA	NA	N	K	K	K	G	K	K	T	T	N	K	K	G	G	N	T	K	T	K	T	G	G	T	G	T	G	K	T	K	K	K	K	G	G	K	G	T	N	K
S1A_64851917	A/G	1A	64851917	+	NA	NA	NA	NA	NA	NA	N	R	R	R	G	R	R	A	A	N	R	R	G	G	N	A	R	A	R	A	G	G	A	G	A	G	R	A	R	R	R	R	G	G	R	G	A	N	R
S1A_68636134	G/A	1A	68636134	+	NA	NA	NA	NA	NA	NA	G	G	N	G	A	G	G	R	G	N	G	R	A	G	G	G	G	A	G	G	G	N	N	G	N	G	G	G	N	G	N	G	N	G	G	G	G	G	N
S1A_70252485	C/A	1A	70252485	+	NA	NA	NA	NA	NA	NA	M	C	C	C	C	C	C	C	M	M	C	C	C	C	C	M	C	M	C	C	C	C	C	C	C	C	N	C	N	M	C	C	C	M	N	C	C	C	C
S1A_71063272	A/G	1A	71063272	+	NA	NA	NA	NA	NA	NA	G	A	G	A	A	A	A	G	A	A	A	A	G	R	G	G	A	G	G	G	A	A	G	G	G	A	N	G	A	G	G	A	A	A	G	A	G	G	A
S1A_76495689	G/C	1A	76495689	+	NA	NA	NA	NA	NA	NA	G	G	G	G	G	G	G	S	S	G	S	G	G	G	S	G	S	S	G	G	G	G	S	G	G	G	G	G	G	S	G	G	G	G	G	S	S	G	G
S1A_76495691	T/G	1A	76495691	+	NA	NA	NA	NA	NA	NA	T	T	T	T	T	T	T	K	K	T	K	T	T	T	K	T	K	K	T	T	T	T	K	T	T	T	T	T	T	K	T	T	T	T	T	K	K	T	T
S1A_76495692	G/T	1A	76495692	+	NA	NA	NA	NA	NA	NA	G	G	G	G	G	G	G	K	K	G	K	G	G	G	K	G	K	K	G	G	G	G	K	G	G	G	G	G	G	K	G	G	G	G	G	K	K	G	G
S1A_76495694	G/T	1A	76495694	+	NA	NA	NA	NA	NA	NA	G	G	G	G	G	G	G	K	K	G	K	G	G	G	K	G	K	K	G	G	G	G	K	G	G	G	G	G	G	K	G	G	G	G	G	K	K	G	G
S1A_78957950	G/C	1A	78957950	+	NA	NA	NA	NA	NA	NA	S	G	C	G	C	G	G	C	S	G	G	S	C	S	C	C	G	C	C	C	G	G	C	S	C	G	C	C	G	C	C	G	G	G	S	G	C	S	S
S1A_82132042	G/C	1A	82132042	+	NA	NA	NA	NA	NA	NA	S	S	S	S	G	S	S	G	S	S	S	G	S	S	S	S	S	G	S	S	S	S	S	S	S	S	S	G	S	S	G	S	S	G	S	S	G	S	S
S1A_82132045	G/A	1A	82132045	+	NA	NA	NA	NA	NA	NA	R	R	R	R	G	R	R	G	R	R	R	G	R	R	R	R	R	G	R	R	R	R	R	R	R	R	R	G	R	R	G	R	R	G	R	R	G	R	R
S1A_83979118	C/A	1A	83979118	+	NA	NA	NA	NA	NA	NA	C	M	C	C	C	C	M	C	C	C	M	C	C	C	N	C	A	C	C	C	C	C	C	C	C	M	C	C	M	C	C	M	C	C	C	C	C	C	C
S1A_83979154	G/T	1A	83979154	+	NA	NA	NA	NA	NA	NA	G	K	G	G	G	G	K	G	G	G	K	G	G	G	N	G	T	G	G	G	G	G	G	G	G	K	G	G	K	G	G	K	G	G	G	G	G	G	G
S1A_84444021	G/C	1A	84444021	+	NA	NA	NA	NA	NA	NA	G	G	S	G	G	G	G	G	G	G	G	G	G	G	G	S	G	G	S	C	G	G	S	G	G	G	S	G	G	S	G	G	G	N	G	G	G	S	G
S1A_84444053	G/A	1A	84444053	+	NA	NA	NA	NA	NA	NA	R	R	G	G	R	G	G	R	R	R	G	G	R	N	A	G	G	A	G	G	N	R	G	G	G	R	G	G	G	G	R	G	G	N	R	R	G	N	R
S1A_86134728	G/C	1A	86134728	+	NA	NA	NA	NA	NA	NA	G	G	G	G	G	G	G	G	G	G	S	G	G	G	N	G	G	G	G	G	G	G	G	S	G	G	G	N	S	G	G	G	S	N	S	G	G	G	G
S1A_90768305	C/G	1A	90768305	+	NA	NA	NA	NA	NA	NA	S	S	C	S	G	S	S	C	G	G	S	S	N	G	G	C	S	N	C	C	G	G	S	C	C	G	C	C	S	C	C	S	G	G	C	N	N	G	C
S1A_92960289	G/T	1A	92960289	+	NA	NA	NA	NA	NA	NA	G	G	K	K	G	G	G	K	G	G	K	K	G	K	G	G	G	G	G	K	G	K	G	G	G	G	K	K	G	G	K	G	G	G	G	G	G	K	G
S1A_98486703	A/T	1A	98486703	+	NA	NA	NA	NA	NA	NA	A	A	A	A	A	A	W	A	A	A	W	W	A	A	A	A	W	A	A	A	A	W	A	A	A	A	A	A	A	A	A	W	A	A	W	A	A	A	A
S1A_99434619	C/A	1A	99434619	+	NA	NA	NA	NA	NA	NA	C	C	M	C	C	C	C	C	C	C	C	C	M	C	C	M	C	C	M	M	C	C	C	C	C	M	M	C	C	M	M	C	C	C	C	C	C	C	M
S1A_100138465	A/G	1A	100138465	+	NA	NA	NA	NA	NA	NA	R	A	A	R	A	R	N	A	A	A	A	N	A	A	A	A	A	R	A	A	A	N	N	A	A	A	N	A	A	A	A	A	A	A	N	A	R	A	A
S1A_102378014	G/A	1A	102378014	+	NA	NA	NA	NA	NA	NA	R	R	R	R	R	R	R	R	R	A	R	R	R	R	R	R	R	R	R	R	R	R	R	R	R	R	R	N	R	R	R	R	R	R	R	R	R	R	R
S1A_107778585	C/A	1A	107778585	+	NA	NA	NA	NA	NA	NA	M	C	C	C	N	C	C	C	C	C	C	C	A	M	C	N	C	N	C	C	C	C	C	C	A	C	N	C	C	C	N	C	C	C	N	C	C	M	C
S1A_110458734	G/A	1A	110458734	+	NA	NA	NA	NA	NA	NA	G	G	R	R	N	R	R	G	R	A	R	A	R	A	G	A	G	R	N	R	R	R	R	G	N	G	G	N	R	R	G	N	G	R	G	G	G	N	N
S1A_110458738	G/T	1A	110458738	+	NA	NA	NA	NA	NA	NA	G	G	G	K	N	K	K	G	K	G	K	G	G	G	K	G	G	G	N	K	G	G	K	T	N	T	T	N	G	G	K	N	G	K	G	K	T	N	N
S1A_110458745	G/A	1A	110458745	+	NA	NA	NA	NA	NA	NA	G	G	G	G	N	G	G	G	G	G	G	G	G	G	G	G	G	G	N	G	G	G	G	G	N	G	G	N	G	G	G	N	G	G	R	G	G	N	N
S1A_114349161	G/A	1A	114349161	+	NA	NA	NA	NA	NA	NA	R	G	A	G	A	R	G	A	R	G	G	G	G	A	G	A	R	R	A	A	G	A	N	R	A	R	N	N	G	A	G	G	G	N	G	G	G	A	G
S1A_117358181	G/A	1A	117358181	+	NA	NA	NA	NA	NA	NA	G	G	R	R	G	G	G	G	G	G	R	G	G	R	G	G	G	R	G	G	N	G	N	R	G	G	R	N	G	N	G	G	N	G	G	G	G	G	R
S1A_121137512	G/C	1A	121137512	+	NA	NA	NA	NA	NA	NA	S	G	C	G	S	C	G	C	G	G	G	G	C	S	G	C	N	C	C	C	G	G	C	S	C	G	C	C	G	C	C	G	G	G	S	G	C	C	S
S1A_121452482	C/T	1A	121452482	+	NA	NA	NA	NA	NA	NA	Y	C	T	C	Y	T	C	T	N	C	C	C	T	Y	Y	T	C	T	T	T	C	C	T	Y	T	C	T	T	C	T	T	C	C	C	T	C	T	T	C
S1A_123549504	G/C	1A	123549504	+	NA	NA	NA	NA	NA	NA	G	G	C	G	S	C	G	C	G	G	G	G	C	G	C	C	G	C	C	N	G	G	C	C	C	G	C	C	G	C	C	G	G	G	S	S	C	C	G
S1A_125549705	C/T	1A	125549705	+	NA	NA	NA	NA	NA	NA	Y	C	Y	N	C	T	C	T	N	N	C	N	Y	C	C	T	N	Y	Y	Y	C	C	C	Y	C	N	Y	Y	C	Y	Y	C	C	C	Y	C	Y	T	Y
S1A_125549733	C/T	1A	125549733	+	NA	NA	NA	NA	NA	NA	Y	Y	Y	N	Y	C	C	C	N	N	T	N	C	T	C	C	N	Y	Y	Y	Y	T	T	C	C	N	Y	C	T	Y	Y	C	T	T	C	Y	Y	C	Y
S1A_125549743	G/A	1A	125549743	+	NA	NA	NA	NA	NA	NA	G	R	R	N	R	G	A	G	N	N	G	N	R	G	A	G	N	R	G	R	R	G	G	R	A	N	R	R	G	R	R	A	G	G	R	R	G	G	R
S1A_129393955	G/A	1A	129393955	+	NA	NA	NA	NA	NA	NA	R	N	R	A	G	N	R	R	N	N	R	R	R	A	R	R	N	G	R	R	N	A	G	R	N	R	G	R	A	R	G	R	A	N	R	R	G	A	R
S1A_129803300	A/C	1A	129803300	+	NA	NA	NA	NA	NA	NA	A	M	A	M	M	M	M	A	M	A	A	A	A	A	A	A	A	A	A	A	A	A	A	A	A	M	A	A	A	A	A	A	A	A	A	A	A	A	A
S1A_131102199	C/T	1A	131102199	+	NA	NA	NA	NA	NA	NA	C	N	C	C	C	Y	C	C	N	C	Y	C	C	C	Y	Y	C	Y	Y	C	T	N	Y	C	C	C	N	C	C	N	C	C	C	C	C	C	Y	Y	Y
S1A_138321692	G/A	1A	138321692	+	NA	NA	NA	NA	NA	NA	G	A	G	G	G	G	A	G	G	G	G	G	G	G	G	G	G	G	G	G	G	G	G	G	G	G	G	G	G	G	G	A	G	G	G	R	G	G	G
S1A_140367045	T/C	1A	140367045	+	NA	NA	NA	NA	NA	NA	T	T	T	N	Y	T	T	Y	T	T	Y	T	T	T	Y	T	N	T	T	T	T	N	N	T	T	T	T	T	T	T	T	T	Y	Y	N	T	T	N	T
S1A_140367052	C/T	1A	140367052	+	NA	NA	NA	NA	NA	NA	C	C	C	N	Y	C	C	Y	C	C	Y	C	C	C	Y	C	N	C	C	C	C	N	N	C	C	C	C	C	C	C	C	C	Y	Y	N	C	C	N	C
S1A_140367060	T/C	1A	140367060	+	NA	NA	NA	NA	NA	NA	T	T	T	N	Y	T	T	Y	T	T	Y	T	T	T	Y	T	N	T	T	T	T	N	N	T	T	T	T	T	T	T	T	T	Y	Y	N	T	T	N	T
S1A_142889441	A/G	1A	142889441	+	NA	NA	NA	NA	NA	NA	R	A	G	A	R	G	A	G	A	A	A	R	G	R	R	G	A	G	G	G	A	A	G	R	G	A	G	G	A	G	G	A	A	A	R	R	G	G	R
S1A_143272071	A/T	1A	143272071	+	NA	NA	NA	NA	NA	NA	W	T	N	T	W	A	T	A	W	N	N	W	A	W	W	A	T	A	A	A	T	T	A	W	A	T	A	A	T	A	A	T	T	T	A	W	A	A	W
S1A_143276460	A/G	1A	143276460	+	NA	NA	NA	NA	NA	NA	R	G	A	R	R	A	G	A	G	G	G	R	A	R	R	A	G	A	A	A	G	G	A	G	A	G	A	A	G	R	A	G	G	G	A	R	A	A	R
S1A_147691640	G/A	1A	147691640	+	NA	NA	NA	NA	NA	NA	G	R	G	G	R	G	G	G	G	G	G	R	G	R	R	G	N	G	G	G	G	G	G	G	G	G	G	N	G	G	N	R	G	G	G	G	G	G	G
S1A_147691680	C/T	1A	147691680	+	NA	NA	NA	NA	NA	NA	T	Y	C	T	Y	C	T	C	Y	T	T	Y	C	Y	C	C	N	C	C	C	T	T	C	C	C	Y	C	N	T	C	N	Y	T	T	Y	Y	C	C	Y
S1A_148744934	C/T	1A	148744934	+	NA	NA	NA	NA	NA	NA	Y	C	T	C	Y	T	C	T	Y	C	C	C	T	Y	T	T	C	T	T	T	C	C	T	Y	N	C	T	T	C	T	T	C	C	C	Y	Y	T	T	Y
S1A_155131352	C/T	1A	155131352	+	NA	NA	NA	NA	NA	NA	Y	C	T	C	C	T	C	T	C	C	C	C	T	C	T	T	C	T	T	T	C	C	T	Y	T	C	T	T	C	T	T	C	C	C	Y	C	T	T	T
S1A_163095527	G/A	1A	163095527	+	NA	NA	NA	NA	NA	NA	N	G	R	G	N	G	G	N	G	G	A	N	R	R	R	G	R	G	G	R	G	N	R	R	R	G	R	A	G	R	G	R	R	G	G	R	G	G	G
S1A_163378584	G/C	1A	163378584	+	NA	NA	NA	NA	NA	NA	G	G	C	G	G	G	G	G	N	S	G	G	S	N	N	C	G	N	C	C	G	G	G	N	N	G	C	N	G	C	N	G	G	G	G	G	N	N	G
S1A_163378589	G/A	1A	163378589	+	NA	NA	NA	NA	NA	NA	A	G	G	R	A	R	A	A	N	R	R	A	R	N	N	G	G	N	G	G	G	R	R	N	N	G	G	N	G	G	N	G	G	R	G	A	N	N	A
S1A_163378609	C/T	1A	163378609	+	NA	NA	NA	NA	NA	NA	C	T	C	Y	C	Y	C	C	N	Y	Y	C	C	N	N	C	T	N	C	C	T	Y	Y	N	N	T	C	N	T	C	N	T	T	Y	T	C	N	N	C
S1A_163696148	C/A	1A	163696148	+	NA	NA	NA	NA	NA	NA	C	A	C	A	M	C	A	C	M	A	A	M	C	M	C	C	A	C	C	C	M	A	C	C	C	A	C	C	A	C	C	A	A	A	M	A	C	C	M
S1A_165563781	C/T	1A	165563781	+	NA	NA	NA	NA	NA	NA	C	C	C	C	C	C	C	C	C	C	C	C	C	C	C	C	C	C	C	C	Y	C	C	C	C	C	C	Y	C	C	C	C	C	C	C	C	C	C	C
S1A_169014059	G/A	1A	169014059	+	NA	NA	NA	NA	NA	NA	R	N	G	R	G	R	R	G	R	R	G	G	G	G	G	G	A	G	G	G	G	G	G	G	G	R	G	N	G	N	G	R	G	G	R	R	G	G	G
S1A_169014086	C/A	1A	169014086	+	NA	NA	NA	NA	NA	NA	M	N	C	M	C	M	M	C	M	M	C	C	C	C	C	C	A	C	C	C	C	C	C	C	C	M	C	N	C	N	C	M	C	C	M	M	C	C	C
S1A_169014088	G/T	1A	169014088	+	NA	NA	NA	NA	NA	NA	K	N	G	K	G	K	K	G	K	K	G	G	G	G	G	G	T	G	G	G	G	G	G	G	G	K	G	N	G	N	G	K	G	G	K	K	G	G	G
S1A_169172146	C/T	1A	169172146	+	NA	NA	NA	NA	NA	NA	C	C	T	C	C	Y	C	Y	C	C	N	C	C	Y	C	T	C	Y	Y	Y	C	N	C	C	C	N	T	N	C	C	N	C	C	C	C	C	C	Y	C
S1A_169172152	G/T	1A	169172152	+	NA	NA	NA	NA	NA	NA	G	G	T	G	G	K	G	K	G	G	N	G	G	K	G	T	G	K	K	K	G	N	G	G	G	N	T	N	G	G	N	G	G	G	G	G	G	K	G
S1A_169172157	T/G	1A	169172157	+	NA	NA	NA	NA	NA	NA	K	T	G	T	T	K	T	G	T	T	N	G	T	K	T	G	T	K	K	K	T	N	K	T	K	N	G	N	T	T	N	K	T	K	G	K	T	K	T
S1A_169172167	T/C	1A	169172167	+	NA	NA	NA	NA	NA	NA	Y	T	T	T	T	T	T	Y	T	T	N	C	T	T	T	T	T	T	T	T	T	N	Y	T	Y	N	T	N	T	T	N	Y	T	Y	C	Y	T	T	T
S1A_169172174	A/G	1A	169172174	+	NA	NA	NA	NA	NA	NA	R	A	A	A	A	A	A	R	A	A	N	G	A	A	A	A	A	A	A	A	A	N	R	A	R	N	A	N	A	A	N	R	A	R	G	R	A	A	A
S1A_177513471	A/G	1A	177513471	+	NA	NA	NA	NA	NA	NA	R	A	R	A	A	A	A	R	R	R	A	A	A	A	A	R	A	R	R	R	A	A	N	R	R	R	G	A	A	R	A	A	R	A	A	A	A	A	A
S1A_177513485	T/C	1A	177513485	+	NA	NA	NA	NA	NA	NA	Y	Y	Y	T	T	T	Y	Y	Y	Y	T	T	T	T	T	Y	T	Y	Y	Y	T	T	N	Y	Y	Y	C	T	T	Y	T	T	Y	Y	Y	T	T	T	T
S1A_177523793	A/C	1A	177523793	+	NA	NA	NA	NA	NA	NA	M	A	C	A	M	C	A	C	M	A	A	M	C	M	M	C	A	C	C	C	A	A	C	M	C	A	C	C	A	C	C	A	A	A	M	M	C	C	C
S1A_180001064	C/A	1A	180001064	+	NA	NA	NA	NA	NA	NA	C	A	C	A	M	C	A	C	A	A	A	A	C	C	C	C	A	C	C	C	A	A	C	C	C	N	N	C	A	C	C	A	A	A	M	A	C	C	C
S1A_181767032	C/T	1A	181767032	+	NA	NA	NA	NA	NA	NA	Y	T	C	N	Y	C	T	C	N	T	T	Y	C	Y	C	C	T	C	C	N	T	N	C	C	C	T	C	C	T	C	C	T	T	T	N	Y	C	C	Y
S1A_181767538	G/A	1A	181767538	+	NA	NA	NA	NA	NA	NA	A	G	A	G	N	A	G	N	R	N	G	A	A	G	R	A	G	A	A	A	N	G	A	A	A	N	A	A	G	A	A	G	G	G	N	G	A	N	A
S1A_181940952	C/T	1A	181940952	+	NA	NA	NA	NA	NA	NA	C	T	C	T	Y	C	T	C	Y	T	T	Y	C	C	Y	C	T	C	C	C	N	T	N	C	C	T	C	C	T	C	C	T	T	T	C	C	C	C	Y
S1A_192592201	C/T	1A	192592201	+	NA	NA	NA	NA	NA	NA	C	C	C	C	C	C	C	C	C	N	C	N	C	C	T	C	C	C	C	C	C	C	C	C	C	N	C	T	C	C	T	C	C	C	Y	Y	T	C	C
S1A_201197951	G/A	1A	201197951	+	NA	NA	NA	NA	NA	NA	N	A	G	A	G	G	A	G	G	A	A	A	G	R	G	G	A	G	G	G	N	N	N	R	G	A	G	G	A	G	N	A	A	A	N	G	G	G	R
S1A_201197965	T/C	1A	201197965	+	NA	NA	NA	NA	NA	NA	N	C	T	C	T	T	C	T	T	C	C	C	T	Y	T	T	C	T	T	T	N	N	N	Y	T	C	T	T	C	T	N	C	C	C	N	T	T	T	Y
S1A_216049657	T/G	1A	216049657	+	NA	NA	NA	NA	NA	NA	T	K	G	T	T	N	T	K	N	N	K	T	T	T	T	K	T	T	K	K	T	T	T	T	T	G	T	T	T	T	T	K	K	T	K	K	T	T	K
S1A_216049662	A/G	1A	216049662	+	NA	NA	NA	NA	NA	NA	A	R	G	A	A	N	A	R	N	N	R	A	A	A	A	R	A	A	R	R	A	A	A	A	A	G	A	A	A	A	A	R	R	A	R	R	A	A	R
S1A_220176480	C/T	1A	220176480	+	NA	NA	NA	NA	NA	NA	Y	T	C	T	Y	C	T	C	T	T	N	Y	C	Y	Y	C	T	C	C	C	T	T	C	Y	C	T	C	C	T	C	C	T	T	T	C	Y	C	C	Y
S1A_220176487	A/G	1A	220176487	+	NA	NA	NA	NA	NA	NA	R	G	A	G	R	A	G	A	G	G	N	R	A	R	R	A	G	A	A	A	G	G	A	R	A	G	A	A	G	A	A	G	G	G	A	R	A	A	R
S1A_221795939	G/C	1A	221795939	+	NA	NA	NA	NA	NA	NA	S	G	C	G	G	C	G	C	G	G	G	S	C	S	S	C	G	C	C	C	G	G	C	C	C	G	C	C	G	C	C	G	G	G	S	S	C	C	G
S1A_222054968	C/A	1A	222054968	+	NA	NA	NA	NA	NA	NA	C	M	C	M	M	M	C	C	C	M	M	M	N	M	M	C	N	A	N	C	M	N	M	M	M	C	C	C	M	N	C	C	M	C	M	M	M	M	A
S1A_222054973	A/T	1A	222054973	+	NA	NA	NA	NA	NA	NA	A	W	A	W	W	W	A	A	A	W	W	W	N	W	W	A	N	T	N	A	W	N	W	W	W	A	A	A	W	N	A	A	W	A	W	W	W	W	T
S1A_224098952	A/G	1A	224098952	+	NA	NA	NA	NA	NA	NA	R	A	R	A	R	R	A	R	A	A	A	G	R	A	A	R	A	R	R	R	A	A	R	R	G	A	R	R	A	R	R	A	A	A	R	A	G	N	A
S1A_230306199	C/A	1A	230306199	+	NA	NA	NA	NA	NA	NA	C	C	C	C	C	C	C	N	C	C	C	A	C	C	C	C	A	C	C	C	A	C	C	C	C	N	N	C	C	C	C	C	C	C	C	C	C	C	C
S1A_238866829	G/A	1A	238866829	+	NA	NA	NA	NA	NA	NA	R	G	A	G	N	A	G	A	G	G	G	G	A	G	R	A	G	A	A	N	G	G	A	A	N	G	A	A	G	A	A	G	G	G	R	R	A	A	R
S1A_238866841	G/A	1A	238866841	+	NA	NA	NA	NA	NA	NA	R	G	A	G	N	A	G	A	G	G	G	G	A	G	R	A	G	A	A	N	G	G	A	A	N	G	A	A	G	A	A	G	G	G	R	R	A	A	R
S1A_238866911	A/G	1A	238866911	+	NA	NA	NA	NA	NA	NA	G	A	G	A	R	G	A	G	A	A	A	A	G	R	G	N	A	G	G	G	A	A	G	G	G	A	G	G	A	G	G	A	A	A	R	N	G	G	R
S1A_238884409	C/G	1A	238884409	+	NA	NA	NA	NA	NA	NA	S	C	C	S	C	C	C	S	S	S	C	C	C	C	N	C	C	C	C	C	C	C	C	N	C	C	C	C	C	C	C	C	C	C	C	C	C	C	C
S1A_238884424	G/A	1A	238884424	+	NA	NA	NA	NA	NA	NA	R	G	G	R	G	G	G	R	R	R	G	G	G	G	N	G	G	G	G	G	G	G	G	N	G	G	G	G	G	G	G	G	G	G	G	G	G	G	G
S1A_240769489	C/T	1A	240769489	+	NA	NA	NA	NA	NA	NA	C	C	C	Y	N	C	Y	N	C	C	Y	C	C	C	C	C	C	C	C	C	C	C	Y	C	N	C	C	N	C	C	C	C	N	C	C	C	C	N	N
S1A_242717867	T/C	1A	242717867	+	NA	NA	NA	NA	NA	NA	Y	Y	C	T	T	T	T	T	N	T	Y	T	T	Y	T	T	T	T	C	N	T	T	T	C	T	Y	T	C	T	C	T	T	N	T	Y	Y	Y	Y	T
S1A_242717871	C/T	1A	242717871	+	NA	NA	NA	NA	NA	NA	C	C	C	C	C	C	C	C	N	C	C	C	C	Y	C	C	C	C	C	N	C	C	C	C	C	C	C	C	C	C	C	C	N	C	C	C	C	Y	C
S1A_244308501	T/A	1A	244308501	+	NA	NA	NA	NA	NA	NA	W	T	T	T	W	T	T	A	T	W	T	T	A	T	W	T	T	W	T	T	W	T	N	T	N	T	T	T	W	T	T	T	W	T	A	W	W	N	T
S1A_244308508	T/C	1A	244308508	+	NA	NA	NA	NA	NA	NA	Y	T	T	T	Y	T	T	C	T	Y	T	T	C	T	Y	T	T	Y	T	T	Y	T	N	T	N	T	T	T	Y	T	T	T	Y	T	C	Y	Y	N	T
S1A_244308524	A/G	1A	244308524	+	NA	NA	NA	NA	NA	NA	R	A	A	A	R	A	A	G	A	R	A	A	G	A	R	A	A	R	A	A	R	A	N	A	N	A	A	A	R	A	A	A	R	A	G	R	R	N	A
S1A_244563368	G/A	1A	244563368	+	NA	NA	NA	NA	NA	NA	R	G	R	G	R	R	G	R	G	G	G	R	R	R	G	R	G	R	R	R	G	G	R	R	G	G	R	A	G	G	R	G	G	G	R	G	R	R	R
S1A_249386862	A/C	1A	249386862	+	NA	NA	NA	NA	NA	NA	C	M	M	A	A	M	N	N	C	M	C	N	A	C	M	M	N	N	M	C	C	M	A	C	C	A	A	N	A	C	M	N	C	A	N	A	A	M	A
S1A_251376894	T/C	1A	251376894	+	NA	NA	NA	NA	NA	NA	T	C	T	C	C	T	C	N	Y	C	C	C	T	Y	Y	T	C	T	T	T	C	C	T	T	T	C	N	T	C	T	T	C	C	N	T	Y	T	T	Y
S1A_255874119	T/A	1A	255874119	+	NA	NA	NA	NA	NA	NA	W	T	A	T	T	A	T	A	W	T	T	W	A	N	A	A	T	A	A	A	N	T	A	W	N	T	A	A	T	A	A	T	T	T	A	N	N	A	W
S1A_256920594	C/T	1A	256920594	+	NA	NA	NA	NA	NA	NA	T	C	T	C	N	T	C	T	Y	C	C	C	T	Y	Y	T	C	T	T	T	C	C	T	Y	T	C	T	T	C	T	T	C	C	C	Y	Y	T	T	Y
S1A_256920597	T/C	1A	256920597	+	NA	NA	NA	NA	NA	NA	C	T	C	T	N	C	T	C	Y	T	T	T	C	Y	Y	C	T	C	C	C	T	T	C	Y	C	T	C	C	T	C	C	T	T	T	Y	Y	C	C	Y
S1A_256921241	C/T	1A	256921241	+	NA	NA	NA	NA	NA	NA	Y	C	T	C	Y	T	C	T	C	C	C	C	T	Y	N	T	C	T	T	T	C	C	T	Y	T	C	T	T	C	T	T	C	C	C	T	C	T	T	Y
S1A_256922520	A/G	1A	256922520	+	NA	NA	NA	NA	NA	NA	R	G	A	G	A	A	G	A	G	G	G	R	A	R	N	A	G	A	N	A	R	G	A	N	A	G	A	A	G	A	A	G	G	G	A	R	A	A	R
S1A_256922521	G/C	1A	256922521	+	NA	NA	NA	NA	NA	NA	S	C	G	C	G	G	C	G	C	C	C	S	G	S	N	G	C	G	N	G	S	C	G	N	G	C	G	G	C	G	G	C	C	C	G	S	G	G	S
S1A_256928919	C/A	1A	256928919	+	NA	NA	NA	NA	NA	NA	M	C	A	C	M	A	C	A	M	C	C	M	A	C	M	A	C	A	A	A	C	C	A	M	A	C	A	A	C	A	A	C	C	C	M	M	A	A	M
S1A_256928934	G/T	1A	256928934	+	NA	NA	NA	NA	NA	NA	K	G	T	G	K	T	G	T	K	G	G	K	T	G	K	T	G	T	T	T	G	G	T	K	T	G	T	T	G	T	T	G	G	G	K	K	T	T	K
S1A_256967859	C/T	1A	256967859	+	NA	NA	NA	NA	NA	NA	Y	C	Y	C	C	Y	C	Y	Y	Y	C	Y	Y	C	C	Y	C	Y	C	Y	C	C	Y	C	C	C	Y	C	C	Y	C	C	C	C	Y	C	C	Y	C
S1A_257560488	A/G	1A	257560488	+	NA	NA	NA	NA	NA	NA	A	A	A	G	A	N	A	R	N	G	A	A	A	A	A	A	A	N	A	R	A	R	A	N	A	A	R	A	A	G	N	A	N	A	A	R	N	A	N
S1A_259478516	C/T	1A	259478516	+	NA	NA	NA	NA	NA	NA	T	N	T	C	C	T	C	T	C	C	C	C	C	C	C	T	C	N	T	T	C	C	Y	Y	C	C	T	N	C	T	T	C	C	C	T	Y	N	C	Y
S1A_259478530	A/T	1A	259478530	+	NA	NA	NA	NA	NA	NA	T	N	T	A	A	T	A	T	A	A	A	A	A	A	A	T	A	N	T	T	A	A	W	W	A	A	T	N	A	T	T	A	A	A	T	W	N	A	W
S1A_261248838	C/G	1A	261248838	+	NA	NA	NA	NA	NA	NA	S	S	S	S	S	S	S	S	S	S	S	S	S	C	S	S	S	S	C	S	S	S	S	C	C	S	C	S	S	S	S	C	S	S	S	S	S	S	S
S1A_261819278	T/C	1A	261819278	+	NA	NA	NA	NA	NA	NA	T	T	N	N	Y	Y	T	Y	T	T	T	T	T	T	N	Y	N	N	Y	Y	T	T	Y	N	T	T	C	Y	T	Y	T	T	T	T	Y	T	N	T	Y
S1A_261819289	C/T	1A	261819289	+	NA	NA	NA	NA	NA	NA	C	T	N	N	C	Y	T	Y	C	C	T	C	C	C	N	Y	N	N	Y	Y	C	C	Y	N	C	C	C	C	Y	Y	Y	Y	C	C	C	C	N	C	C
S1A_262009390	C/T	1A	262009390	+	NA	NA	NA	NA	NA	NA	Y	Y	Y	Y	Y	C	C	Y	Y	Y	Y	C	Y	C	C	Y	Y	Y	Y	Y	Y	Y	C	C	C	Y	C	Y	T	Y	Y	Y	Y	Y	Y	Y	Y	Y	Y
S1A_262443087	C/T	1A	262443087	+	NA	NA	NA	NA	NA	NA	Y	C	T	C	T	T	C	T	C	C	C	C	C	C	Y	T	C	Y	T	T	C	C	T	T	C	C	T	T	C	T	T	C	C	C	Y	Y	T	C	Y
S1A_265067602	C/T	1A	265067602	+	NA	NA	NA	NA	NA	NA	Y	C	T	C	Y	T	N	T	C	C	C	C	C	C	Y	T	C	T	T	N	N	C	Y	Y	C	C	T	N	C	T	T	C	C	C	T	C	T	N	Y
S1A_266198841	A/C	1A	266198841	+	NA	NA	NA	NA	NA	NA	M	A	C	A	N	C	A	C	A	A	N	A	A	A	A	C	M	C	N	C	N	A	C	M	A	A	C	C	A	C	C	A	N	A	M	A	C	N	C
S1A_268118965	C/T	1A	268118965	+	NA	NA	NA	NA	NA	NA	T	Y	C	T	N	N	Y	C	C	C	T	T	Y	Y	N	C	N	Y	C	C	N	T	Y	C	Y	T	C	C	C	N	C	C	Y	T	C	Y	C	Y	C
S1A_272210179	C/A	1A	272210179	+	NA	NA	NA	NA	NA	NA	C	C	M	C	C	M	C	C	C	C	C	C	C	C	C	M	C	C	A	M	C	C	C	C	C	C	M	C	C	M	C	C	C	C	C	C	C	C	C
S1A_273519920	G/A	1A	273519920	+	NA	NA	NA	NA	NA	NA	G	A	G	G	G	G	A	G	G	G	G	A	A	A	G	G	R	G	G	G	A	G	G	R	G	G	G	G	R	N	G	N	G	R	G	N	N	R	G
S1A_273519922	C/T	1A	273519922	+	NA	NA	NA	NA	NA	NA	Y	T	C	C	Y	C	T	Y	C	C	C	T	T	T	C	Y	Y	C	Y	C	T	C	Y	Y	C	C	Y	T	Y	N	T	N	C	Y	Y	N	N	Y	Y
S1A_275480541	A/G	1A	275480541	+	NA	NA	NA	NA	NA	NA	R	R	A	R	N	A	A	A	A	A	A	A	N	A	N	A	A	A	A	A	A	R	A	A	A	A	A	N	A	A	N	A	A	A	A	A	A	A	A
S1A_275765978	A/G	1A	275765978	+	NA	NA	NA	NA	NA	NA	A	G	A	A	A	A	G	A	A	A	A	G	G	G	A	A	G	R	A	A	G	A	R	A	G	A	A	A	A	A	A	G	A	R	A	R	A	G	A
S1A_278230314	A/T	1A	278230314	+	NA	NA	NA	NA	NA	NA	W	A	T	A	A	T	A	T	A	A	A	A	A	A	W	N	A	N	T	T	A	A	W	W	A	A	T	N	A	T	T	A	A	A	T	W	T	A	T
S1A_283847798	G/A	1A	283847798	+	NA	NA	NA	NA	NA	NA	R	N	G	N	A	N	N	A	R	A	R	G	A	G	R	G	R	R	G	G	R	A	R	G	A	R	G	A	G	N	R	A	G	N	G	R	G	R	G
S1A_283847800	G/A	1A	283847800	+	NA	NA	NA	NA	NA	NA	R	N	G	N	A	N	N	A	R	A	R	G	A	G	R	G	R	R	G	G	R	A	R	G	A	R	G	A	G	N	R	A	G	N	G	R	G	R	G
S1A_283855283	C/T	1A	283855283	+	NA	NA	NA	NA	NA	NA	T	C	T	C	C	T	C	T	C	C	C	C	C	C	T	T	C	Y	T	T	N	C	Y	T	C	C	T	T	C	T	T	C	C	C	Y	Y	T	C	T
S1A_284321998	T/C	1A	284321998	+	NA	NA	NA	NA	NA	NA	Y	T	C	T	Y	C	T	C	T	T	T	T	T	T	C	C	T	C	C	C	T	T	C	Y	T	T	C	C	T	N	C	T	T	T	Y	Y	C	T	Y
S1A_285206887	A/C	1A	285206887	+	NA	NA	NA	NA	NA	NA	M	A	M	A	M	C	A	C	A	N	A	A	A	A	A	C	A	C	C	C	A	A	M	M	A	A	C	N	A	C	C	A	A	A	M	M	C	A	M
S1A_285351710	T/C	1A	285351710	+	NA	NA	NA	NA	NA	NA	Y	T	C	T	C	C	T	C	T	T	N	N	T	T	C	C	T	C	C	C	T	T	N	Y	T	T	C	C	T	C	C	T	T	T	C	T	C	T	N
S1A_285635261	G/A	1A	285635261	+	NA	NA	NA	NA	NA	NA	R	G	A	G	R	A	G	A	G	G	G	G	G	G	A	A	G	N	A	A	G	N	A	A	G	G	N	A	G	A	A	G	N	G	A	G	A	G	A
S1A_287685816	C/T	1A	287685816	+	NA	NA	NA	NA	NA	NA	Y	Y	Y	Y	Y	Y	Y	Y	Y	Y	Y	Y	Y	Y	C	Y	Y	Y	Y	Y	C	Y	C	Y	T	Y	Y	Y	Y	Y	Y	Y	Y	Y	Y	Y	Y	Y	Y
S1A_287685864	A/G	1A	287685864	+	NA	NA	NA	NA	NA	NA	R	R	R	R	R	R	R	R	R	R	R	R	R	R	A	R	R	R	R	R	A	R	A	R	G	R	R	R	R	R	R	R	R	R	R	R	R	R	R
S1A_288212607	G/C	1A	288212607	+	NA	NA	NA	NA	NA	NA	G	G	G	G	G	N	G	G	G	G	G	G	N	C	C	G	G	G	G	G	G	G	G	N	G	S	G	G	G	G	N	N	N	G	G	G	G	N	G
S1A_289268176	T/C	1A	289268176	+	NA	NA	NA	NA	NA	NA	Y	T	C	T	T	C	T	N	T	T	T	T	T	T	Y	C	T	C	C	C	T	T	T	C	T	T	C	N	T	C	C	T	T	T	C	Y	N	T	C
S1A_290369635	A/G	1A	290369635	+	NA	NA	NA	NA	NA	NA	A	A	A	A	R	G	A	R	A	A	A	A	N	A	G	A	A	A	A	A	A	A	A	A	A	A	A	G	A	A	G	A	A	A	R	A	G	A	A
S1A_290732234	G/C	1A	290732234	+	NA	NA	NA	NA	NA	NA	S	G	G	G	S	C	G	S	G	G	G	G	G	G	S	G	G	G	G	G	G	G	S	G	G	G	G	C	G	G	C	G	G	G	S	S	C	G	G
S1A_292790802	T/C	1A	292790802	+	NA	NA	NA	NA	NA	NA	T	T	T	Y	C	Y	T	T	T	T	N	T	T	T	T	T	T	T	T	T	T	T	Y	T	T	Y	T	T	T	T	T	T	T	Y	N	T	T	T	C
S1A_292790817	C/G	1A	292790817	+	NA	NA	NA	NA	NA	NA	C	C	C	S	G	S	C	C	C	C	N	C	C	C	C	C	C	C	C	C	C	C	S	C	C	S	C	C	C	C	C	C	C	S	N	C	C	C	G
S1A_292790820	A/G	1A	292790820	+	NA	NA	NA	NA	NA	NA	A	A	A	R	R	R	A	A	A	A	N	A	A	A	A	A	A	A	A	A	A	A	R	A	A	R	A	A	A	A	A	A	A	A	N	A	A	A	G
S1A_292790835	C/T	1A	292790835	+	NA	NA	NA	NA	NA	NA	C	C	C	Y	Y	C	C	C	C	C	N	C	C	C	C	C	C	C	C	C	C	C	C	C	C	C	C	C	C	C	C	C	C	Y	N	C	C	C	C
S1A_293246145	G/T	1A	293246145	+	NA	NA	NA	NA	NA	NA	G	K	G	K	G	G	G	T	K	T	G	G	G	G	K	G	G	T	N	G	G	G	G	G	T	T	G	N	T	G	G	G	T	G	G	G	G	T	T
S1A_293734502	T/C	1A	293734502	+	NA	NA	NA	NA	NA	NA	Y	T	C	T	Y	C	N	C	T	T	T	T	T	T	C	C	T	N	C	C	T	N	C	T	T	T	C	C	T	C	C	N	T	T	T	T	N	N	T
S1A_293734515	C/T	1A	293734515	+	NA	NA	NA	NA	NA	NA	Y	C	T	C	Y	T	N	T	C	C	C	C	C	C	T	T	C	N	T	T	C	N	T	C	C	C	T	T	C	T	T	N	C	C	C	C	N	N	C
S1A_294513533	C/A	1A	294513533	+	NA	NA	NA	NA	NA	NA	M	C	A	C	M	A	C	A	C	C	C	C	C	C	N	A	C	A	A	A	C	C	A	M	C	A	A	A	C	A	A	C	C	C	M	M	A	C	A
S1A_294734999	A/G	1A	294734999	+	NA	NA	NA	NA	NA	NA	R	A	G	A	A	G	A	G	A	A	A	A	A	A	R	G	A	G	G	G	A	A	R	R	A	A	G	G	A	G	G	A	A	A	R	R	G	A	G
S1A_294735024	A/C	1A	294735024	+	NA	NA	NA	NA	NA	NA	M	A	C	A	A	C	A	C	A	A	A	A	A	A	M	C	A	C	C	C	A	A	M	M	A	A	C	C	A	C	C	A	A	A	M	M	C	A	C
S1A_294737605	A/G	1A	294737605	+	NA	NA	NA	NA	NA	NA	R	A	G	N	G	G	A	G	A	A	N	A	A	A	R	G	A	G	G	G	A	N	R	G	A	G	G	N	N	G	G	A	N	A	N	R	G	A	G
S1A_295223796	G/C	1A	295223796	+	NA	NA	NA	NA	NA	NA	G	C	G	S	S	G	S	G	S	S	S	S	S	S	G	G	S	G	G	G	S	S	S	G	S	G	G	G	S	G	G	S	S	S	S	S	G	S	G
S1A_295537776	T/C	1A	295537776	+	NA	NA	NA	NA	NA	NA	Y	T	C	T	Y	C	T	C	N	T	T	T	T	T	C	C	T	C	C	C	T	T	Y	Y	T	C	C	C	T	C	C	T	T	T	Y	Y	C	T	C
S1A_295537839	G/A	1A	295537839	+	NA	NA	NA	NA	NA	NA	R	G	R	G	R	R	G	R	G	G	G	G	G	G	R	R	G	R	R	R	G	G	R	R	G	G	R	A	G	R	R	G	G	G	R	G	R	G	R
S1A_298646355	A/G	1A	298646355	+	NA	NA	NA	NA	NA	NA	R	A	G	A	R	G	A	G	A	A	A	A	A	A	R	G	A	R	G	G	A	A	G	G	A	G	G	G	A	G	G	A	A	A	R	A	G	A	G
S1A_298646400	C/T	1A	298646400	+	NA	NA	NA	NA	NA	NA	Y	C	T	C	C	T	C	T	C	C	C	C	C	C	Y	T	C	T	T	T	C	C	T	T	C	T	T	T	C	T	T	C	C	C	T	C	T	C	T
S1A_298654601	T/C	1A	298654601	+	NA	NA	NA	NA	NA	NA	Y	Y	C	T	Y	C	N	C	T	T	T	T	N	T	Y	C	T	C	C	C	T	T	C	C	Y	C	C	C	T	C	C	T	T	T	T	T	C	T	C
S1A_299628848	T/C	1A	299628848	+	NA	NA	NA	NA	NA	NA	Y	T	C	T	C	C	Y	C	T	N	T	T	T	T	T	C	N	Y	N	C	T	T	Y	T	T	T	C	N	T	C	T	T	T	T	C	T	T	N	C
S1A_302922229	C/T	1A	302922229	+	NA	NA	NA	NA	NA	NA	C	C	C	C	C	C	C	C	N	C	C	C	C	C	N	C	C	C	N	C	C	C	C	C	C	T	C	T	C	C	T	C	C	C	C	C	T	C	Y
S1A_302922335	G/C	1A	302922335	+	NA	NA	NA	NA	NA	NA	G	G	G	G	G	G	G	G	G	G	G	G	G	G	C	G	G	G	G	G	G	G	G	G	G	C	G	N	G	G	C	G	G	G	S	G	C	G	S
S1A_302939347	C/A	1A	302939347	+	NA	NA	NA	NA	NA	NA	M	C	C	C	C	A	C	M	C	C	C	M	C	C	C	C	A	C	C	C	A	C	M	C	C	C	C	C	C	C	C	C	C	C	C	C	C	C	C
S1A_302958049	C/A	1A	302958049	+	NA	NA	NA	NA	NA	NA	C	N	C	C	N	C	C	C	C	C	C	C	C	C	A	C	C	C	C	C	C	C	C	C	C	A	C	A	C	C	A	C	C	C	C	M	A	C	M
S1A_303250586	G/A	1A	303250586	+	NA	NA	NA	NA	NA	NA	A	G	N	G	G	N	G	A	G	N	G	A	G	G	G	N	A	N	N	G	A	G	R	G	G	N	G	G	G	N	G	G	G	G	G	G	G	G	G
S1A_303250589	C/G	1A	303250589	+	NA	NA	NA	NA	NA	NA	G	C	N	C	C	N	C	G	C	N	C	G	C	C	G	N	G	N	N	C	G	C	S	C	C	N	C	G	C	N	G	C	C	C	G	S	G	C	C
S1A_303728144	G/T	1A	303728144	+	NA	NA	NA	NA	NA	NA	G	K	G	T	K	G	T	G	T	N	T	G	T	T	G	G	G	K	G	G	G	T	K	K	N	G	G	G	T	G	G	T	T	T	G	K	G	N	G
S1A_305511747	C/T	1A	305511747	+	NA	NA	NA	NA	NA	NA	C	C	C	C	N	C	C	C	Y	C	C	Y	C	N	N	C	Y	C	Y	C	T	N	Y	C	C	C	C	Y	C	C	C	C	C	N	C	C	N	C	C
S1A_305511765	G/T	1A	305511765	+	NA	NA	NA	NA	NA	NA	G	G	G	G	N	G	G	G	K	G	G	K	G	N	N	G	K	G	K	G	T	N	K	G	G	G	G	K	G	G	G	G	G	N	G	G	N	G	G
S1A_306106870	C/T	1A	306106870	+	NA	NA	NA	NA	NA	NA	C	Y	C	C	C	C	C	C	C	C	C	C	C	C	Y	C	C	C	C	C	C	C	C	C	C	C	Y	T	C	C	T	C	C	C	C	Y	T	C	C
S1A_307408817	T/C	1A	307408817	+	NA	NA	NA	NA	NA	NA	T	Y	T	C	Y	T	C	T	C	C	C	Y	C	C	Y	T	T	Y	T	T	T	C	Y	Y	C	T	N	T	C	T	T	C	C	C	Y	C	T	C	T
S1A_307408827	C/T	1A	307408827	+	NA	NA	NA	NA	NA	NA	C	Y	C	T	Y	C	T	C	T	T	T	Y	T	T	Y	C	C	Y	C	C	C	T	Y	Y	T	C	N	C	T	C	C	T	T	T	Y	T	C	T	C
S1A_307706460	C/T	1A	307706460	+	NA	NA	NA	NA	NA	NA	C	Y	Y	C	C	Y	Y	C	C	Y	C	C	C	C	C	C	C	Y	C	Y	C	Y	C	C	C	Y	C	Y	C	C	C	C	Y	Y	C	C	C	C	C
S1A_308576052	A/G	1A	308576052	+	NA	NA	NA	NA	NA	NA	A	A	R	A	A	A	A	A	N	A	A	A	A	A	A	R	A	A	A	R	A	A	A	A	A	A	A	A	A	R	A	A	A	A	A	A	A	A	A
S1A_309452599	A/G	1A	309452599	+	NA	NA	NA	NA	NA	NA	G	A	G	A	R	G	A	G	A	A	A	A	A	A	A	G	A	R	G	G	A	A	A	G	A	N	G	A	A	G	A	A	A	A	R	A	A	A	N
S1A_309761144	G/A	1A	309761144	+	NA	NA	NA	NA	NA	NA	R	G	A	G	G	G	G	R	G	G	G	G	G	G	G	A	G	A	A	A	G	G	G	R	G	G	A	G	G	A	G	G	G	G	G	G	G	G	R
S1A_311808383	T/C	1A	311808383	+	NA	NA	NA	NA	NA	NA	C	T	C	T	Y	C	T	C	T	T	T	T	T	T	T	C	T	C	C	C	T	T	Y	T	T	T	C	T	T	C	T	T	T	T	Y	T	T	T	Y
S1A_312161057	C/T	1A	312161057	+	NA	NA	NA	NA	NA	NA	N	C	T	C	C	C	C	C	C	C	C	C	C	C	C	T	C	T	T	T	C	N	C	T	C	C	T	C	C	T	N	C	C	C	N	C	C	C	Y
S1A_313116215	G/A	1A	313116215	+	NA	NA	NA	NA	NA	NA	G	R	G	G	G	G	R	G	G	R	G	R	R	G	G	G	G	G	G	G	G	G	R	G	G	G	G	G	G	G	G	R	G	N	R	G	A	R	G
S1A_313137718	T/C	1A	313137718	+	NA	NA	NA	NA	NA	NA	Y	T	C	T	T	C	T	Y	T	T	T	T	T	C	T	C	T	T	C	C	T	T	Y	Y	T	T	C	T	T	C	T	T	T	T	Y	T	T	Y	Y
S1A_314479186	T/C	1A	314479186	+	NA	NA	NA	NA	NA	NA	Y	T	C	T	T	T	T	C	T	T	T	T	T	T	T	C	T	C	C	C	T	T	T	C	T	T	C	T	T	C	T	T	T	T	Y	T	T	T	Y
S1A_320331408	G/A	1A	320331408	+	NA	NA	NA	NA	NA	NA	R	G	A	G	G	G	G	A	G	G	G	G	G	G	G	A	G	R	A	A	G	G	G	R	G	G	A	G	G	A	G	G	G	G	R	G	G	G	R
S1A_321110832	G/T	1A	321110832	+	NA	NA	NA	NA	NA	NA	K	G	G	K	G	G	G	G	G	G	G	G	G	G	N	G	G	G	G	G	G	K	G	G	G	G	G	K	G	G	K	G	G	K	G	G	G	G	G
S1A_321875817	G/A	1A	321875817	+	NA	NA	NA	NA	NA	NA	R	R	R	R	G	G	G	R	R	G	A	R	R	R	R	R	R	R	A	R	R	R	G	R	R	R	R	R	R	R	R	R	G	R	R	R	R	R	R
S1A_328086507	C/T	1A	328086507	+	NA	NA	NA	NA	NA	NA	C	Y	Y	Y	Y	C	Y	Y	Y	Y	Y	Y	Y	Y	Y	Y	Y	Y	Y	T	Y	Y	Y	Y	Y	Y	Y	Y	Y	T	Y	Y	C	Y	Y	Y	Y	Y	Y
S1A_328837859	G/A	1A	328837859	+	NA	NA	NA	NA	NA	NA	R	R	G	R	R	A	R	R	G	G	G	R	G	R	G	G	G	R	G	G	G	G	A	G	R	R	G	R	R	G	R	R	R	R	R	R	G	G	R
S1A_336610813	T/C	1A	336610813	+	NA	NA	NA	NA	NA	NA	T	Y	T	T	T	N	C	T	C	C	T	Y	C	C	Y	T	T	Y	T	T	T	C	C	T	C	C	T	T	T	T	T	C	T	T	T	Y	T	C	Y
S1A_336610818	G/C	1A	336610818	+	NA	NA	NA	NA	NA	NA	G	S	G	G	G	N	C	G	C	C	G	S	C	C	S	G	G	S	G	G	G	C	C	G	C	C	G	G	G	G	G	C	G	G	G	S	G	C	S
S1A_336729197	C/A	1A	336729197	+	NA	NA	NA	NA	NA	NA	C	C	C	C	C	C	C	C	C	C	M	C	C	C	C	C	C	C	C	C	C	C	C	C	C	C	M	C	M	C	C	M	M	C	M	C	C	C	C
S1A_337947897	A/G	1A	337947897	+	NA	NA	NA	NA	NA	NA	A	G	A	N	A	G	G	A	G	G	A	A	G	G	A	A	A	A	N	A	A	G	N	A	G	G	A	A	A	A	N	G	A	N	A	R	A	G	R
S1A_338746332	G/A	1A	338746332	+	NA	NA	NA	NA	NA	NA	G	R	G	G	G	A	N	G	N	A	G	G	A	A	A	G	G	R	G	G	G	A	A	G	A	R	G	G	G	G	G	A	G	G	G	A	G	A	G
S1A_338746404	G/A	1A	338746404	+	NA	NA	NA	NA	NA	NA	R	G	G	A	G	G	G	G	G	G	A	R	G	G	G	G	A	G	G	G	A	G	G	R	G	G	G	N	A	G	G	G	A	R	R	G	G	G	G
S1A_338834939	C/T	1A	338834939	+	NA	NA	NA	NA	NA	NA	Y	C	T	C	Y	T	C	T	C	C	C	C	C	C	T	T	C	Y	T	T	C	C	T	Y	C	C	N	T	C	T	T	C	C	C	T	Y	T	C	Y
S1A_338840971	C/T	1A	338840971	+	NA	NA	NA	NA	NA	NA	T	C	T	C	C	N	C	T	C	C	C	C	C	C	C	T	C	C	T	T	C	C	C	N	C	C	T	C	C	T	C	C	C	C	C	C	C	C	Y
S1A_339516901	T/C	1A	339516901	+	NA	NA	NA	NA	NA	NA	N	Y	T	T	N	T	C	T	C	C	T	T	C	N	T	T	T	Y	T	T	T	C	Y	T	C	C	T	T	T	T	T	C	T	T	T	C	T	C	Y
S1A_339516917	C/T	1A	339516917	+	NA	NA	NA	NA	NA	NA	N	C	C	T	N	C	C	C	C	C	T	T	C	N	C	C	T	C	C	C	T	C	C	Y	C	C	C	C	T	C	C	C	T	T	C	C	C	C	C
S1A_339927670	C/T	1A	339927670	+	NA	NA	NA	NA	NA	NA	C	C	C	T	T	C	C	C	C	C	T	Y	C	C	C	C	T	C	C	C	T	C	C	Y	C	C	C	C	T	C	C	C	N	T	Y	C	C	C	C
S1A_341122428	C/T	1A	341122428	+	NA	NA	NA	NA	NA	NA	C	T	C	C	C	T	T	C	T	T	C	C	T	T	C	C	C	Y	C	C	C	T	T	C	T	T	C	C	C	C	C	T	C	C	C	Y	C	T	Y
S1A_341995288	G/C	1A	341995288	+	NA	NA	NA	NA	NA	NA	S	S	G	G	G	S	S	S	G	S	G	S	S	G	S	S	S	S	G	G	S	S	G	G	G	G	S	S	S	G	G	S	S	S	S	S	S	S	G
S1A_343422733	A/T	1A	343422733	+	NA	NA	NA	NA	NA	NA	A	A	W	A	A	A	A	W	A	A	A	A	A	A	W	W	A	W	W	W	A	A	A	W	A	A	W	W	A	W	W	A	A	A	W	A	W	A	W
S1A_344478534	T/G	1A	344478534	+	NA	NA	NA	NA	NA	NA	K	K	T	K	T	T	K	K	G	T	T	K	T	T	T	K	N	K	K	T	T	T	T	N	T	T	T	K	T	T	K	K	T	T	T	T	T	K	T
S1A_345115118	C/T	1A	345115118	+	NA	NA	NA	NA	NA	NA	T	C	C	T	T	C	C	C	N	N	T	Y	C	C	C	C	T	C	C	C	T	C	C	C	C	C	C	C	T	C	C	C	T	T	Y	C	C	C	C
S1A_347648337	C/T	1A	347648337	+	NA	NA	NA	NA	NA	NA	Y	C	C	T	Y	C	C	C	C	N	T	T	C	C	C	C	T	C	C	C	T	C	C	T	C	C	C	C	T	C	C	C	T	Y	C	C	C	C	C
S1A_349997805	A/G	1A	349997805	+	NA	NA	NA	NA	NA	NA	R	R	R	A	G	A	A	R	A	A	A	A	A	A	R	R	A	R	R	R	A	A	A	R	A	A	G	R	A	G	R	A	A	A	R	R	R	A	R
S1A_350405981	G/A	1A	350405981	+	NA	NA	NA	NA	NA	NA	G	R	A	G	R	G	G	R	G	G	G	G	G	G	R	R	G	R	G	R	G	G	G	R	G	G	R	A	G	G	R	G	G	G	R	R	R	G	R
S1A_350406007	C/T	1A	350406007	+	NA	NA	NA	NA	NA	NA	C	C	C	Y	C	C	C	C	C	C	C	C	C	C	C	Y	Y	C	T	Y	C	C	Y	C	Y	C	Y	C	C	T	C	C	C	C	C	C	C	C	C
S1A_351863254	T/C	1A	351863254	+	NA	NA	NA	NA	NA	NA	T	Y	N	Y	Y	T	T	Y	T	Y	Y	C	Y	Y	N	T	T	N	N	T	T	C	T	T	T	T	N	N	Y	T	T	T	Y	T	Y	Y	T	Y	C
S1A_351863256	C/A	1A	351863256	+	NA	NA	NA	NA	NA	NA	C	M	N	M	M	C	C	M	C	M	M	A	M	M	N	C	C	N	N	C	C	A	C	C	C	C	N	N	M	C	C	C	M	C	M	M	C	M	A
S1A_351863260	C/T	1A	351863260	+	NA	NA	NA	NA	NA	NA	C	Y	N	Y	Y	C	C	Y	C	Y	Y	T	Y	Y	N	C	C	N	N	C	C	T	C	C	C	C	N	N	Y	C	C	C	Y	C	Y	Y	C	Y	T
S1A_352859995	C/T	1A	352859995	+	NA	NA	NA	NA	NA	NA	C	C	C	C	C	C	T	C	C	C	C	C	T	T	N	C	C	C	C	C	C	T	C	C	T	T	C	C	C	C	C	T	C	C	N	Y	C	T	C
S1A_353918732	C/T	1A	353918732	+	NA	NA	NA	NA	NA	NA	C	C	C	C	C	T	T	C	C	C	C	C	T	T	C	C	C	T	C	C	C	T	T	N	T	T	C	C	C	C	C	T	C	Y	C	Y	N	T	Y
S1A_353918754	T/C	1A	353918754	+	NA	NA	NA	NA	NA	NA	T	T	T	T	T	C	C	T	C	C	T	T	C	C	T	T	T	C	T	T	T	C	C	N	C	C	T	T	T	T	T	C	T	Y	T	Y	N	C	Y
S1A_353918761	C/T	1A	353918761	+	NA	NA	NA	NA	NA	NA	C	C	C	C	C	T	T	C	C	C	C	C	T	T	C	C	C	T	C	C	C	T	T	N	T	T	C	C	C	C	C	T	C	Y	C	Y	N	T	Y
S1A_354189942	G/C	1A	354189942	+	NA	NA	NA	NA	NA	NA	S	G	S	G	G	S	G	G	G	G	G	G	S	G	G	G	G	G	G	S	G	G	S	G	G	G	C	G	G	S	G	G	G	G	S	G	G	G	G
S1A_354937399	G/A	1A	354937399	+	NA	NA	NA	NA	NA	NA	R	G	R	N	G	G	G	G	G	G	G	G	R	G	G	G	G	G	G	R	G	G	R	G	G	G	R	G	G	R	G	G	G	G	R	G	N	G	G
S1A_355339792	G/A	1A	355339792	+	NA	NA	NA	NA	NA	NA	N	R	G	A	G	A	A	G	N	G	G	G	A	A	G	G	N	R	G	N	G	A	A	N	A	A	G	G	N	G	G	A	G	N	R	R	G	A	R
S1A_357787788	C/T	1A	357787788	+	NA	NA	NA	NA	NA	NA	Y	Y	Y	Y	Y	Y	Y	Y	Y	Y	Y	Y	Y	C	Y	Y	Y	Y	Y	T	Y	C	C	Y	Y	Y	Y	Y	Y	Y	Y	Y	Y	Y	Y	Y	Y	C	Y
S1A_358151433	G/A	1A	358151433	+	NA	NA	NA	NA	NA	NA	G	R	G	A	G	A	A	G	N	A	G	R	A	A	G	G	G	R	G	G	G	A	A	G	A	A	G	G	G	G	G	A	G	G	N	A	G	A	R
S1A_359245751	G/C	1A	359245751	+	NA	NA	NA	NA	NA	NA	S	G	G	G	C	G	G	G	G	G	C	S	G	G	S	G	C	G	G	G	C	G	G	S	G	G	G	C	C	G	C	G	C	G	G	G	C	G	G
S1A_361070397	G/A	1A	361070397	+	NA	NA	NA	NA	NA	NA	R	G	A	G	G	G	G	R	G	G	G	G	G	G	G	A	G	A	A	A	G	G	G	R	G	G	A	G	G	A	G	G	G	G	G	G	G	G	A
S1A_361635441	C/T	1A	361635441	+	NA	NA	NA	NA	NA	NA	C	C	N	C	Y	N	C	C	C	C	T	C	C	C	C	C	T	C	C	C	T	C	N	Y	C	C	C	C	T	C	C	C	T	Y	Y	C	C	C	C
S1A_362620495	C/T	1A	362620495	+	NA	NA	NA	NA	NA	NA	C	C	C	C	C	Y	C	C	C	C	N	C	C	C	C	C	N	C	C	C	N	C	C	C	C	C	C	Y	C	C	Y	C	N	C	C	C	C	C	Y
S1A_362620496	C/T	1A	362620496	+	NA	NA	NA	NA	NA	NA	C	C	C	C	T	C	C	C	C	C	N	C	C	C	C	C	N	C	C	C	N	C	C	C	C	C	C	Y	T	C	Y	C	N	C	C	C	T	C	C
S1A_363655792	A/C	1A	363655792	+	NA	NA	NA	NA	NA	NA	M	M	M	M	M	M	M	M	M	M	M	M	M	A	M	M	M	M	M	M	M	A	M	M	M	M	M	M	M	M	M	M	M	M	M	M	M	A	M
S1A_363655807	G/T	1A	363655807	+	NA	NA	NA	NA	NA	NA	K	K	K	K	K	K	K	K	K	K	K	K	K	G	K	K	K	K	K	K	K	G	K	K	K	K	K	K	K	K	K	K	K	K	K	K	K	G	K
S1A_366133045	A/G	1A	366133045	+	NA	NA	NA	NA	NA	NA	A	R	A	G	A	G	G	A	G	G	A	N	N	G	A	A	A	A	N	A	A	G	G	A	G	N	N	A	A	A	A	G	A	A	N	G	A	G	A
S1A_366133063	G/A	1A	366133063	+	NA	NA	NA	NA	NA	NA	R	G	G	G	G	G	G	G	G	G	A	N	N	G	G	G	A	G	N	G	A	G	G	G	G	N	N	G	A	G	G	G	A	A	N	G	G	G	G
S1A_366134756	C/T	1A	366134756	+	NA	NA	NA	NA	NA	NA	C	C	Y	Y	C	C	C	C	Y	T	C	C	Y	C	C	Y	Y	C	Y	Y	C	C	C	C	C	C	Y	C	Y	Y	C	C	Y	C	Y	C	C	C	C
S1A_366134780	T/C	1A	366134780	+	NA	NA	NA	NA	NA	NA	T	T	Y	Y	T	T	T	T	Y	C	T	T	Y	T	T	Y	Y	T	Y	Y	T	T	T	T	T	T	Y	T	Y	Y	T	T	Y	T	Y	T	T	T	T
S1A_366589331	C/G	1A	366589331	+	NA	NA	NA	NA	NA	NA	G	C	G	C	C	C	C	G	C	C	C	N	C	C	C	G	C	G	G	G	C	C	C	S	C	C	G	C	C	G	N	C	C	C	N	C	C	C	S
S1A_366589354	G/A	1A	366589354	+	NA	NA	NA	NA	NA	NA	G	R	G	G	A	G	G	G	G	G	A	N	G	G	R	G	A	G	G	G	A	G	G	R	G	G	G	A	A	G	N	G	A	G	N	G	A	G	G
S1A_368364727	C/T	1A	368364727	+	NA	NA	NA	NA	NA	NA	Y	C	C	C	Y	C	C	C	C	C	T	T	C	C	C	C	T	C	C	C	T	C	C	Y	C	C	C	C	T	C	C	C	T	Y	C	C	C	C	C
S1A_368364728	G/C	1A	368364728	+	NA	NA	NA	NA	NA	NA	S	G	G	G	S	G	G	G	G	G	C	C	G	G	G	G	C	G	G	G	C	G	G	S	G	G	G	G	C	G	G	G	C	S	G	G	G	G	G
S1A_368712993	G/A	1A	368712993	+	NA	NA	NA	NA	NA	NA	A	R	N	G	R	N	N	A	G	G	G	G	G	N	A	A	G	N	A	A	G	G	G	R	G	G	A	A	G	A	A	G	N	G	A	R	A	G	R
S1A_368713832	T/G	1A	368713832	+	NA	NA	NA	NA	NA	NA	K	T	G	T	T	T	T	K	T	T	T	T	T	T	T	G	T	G	G	G	T	T	T	G	T	T	G	T	T	G	T	T	T	T	K	T	T	T	K
S1A_368746801	T/C	1A	368746801	+	NA	NA	NA	NA	NA	NA	Y	Y	T	T	Y	T	T	Y	T	T	T	T	T	T	Y	T	T	T	T	T	T	T	T	T	T	T	T	C	T	T	C	T	T	T	Y	Y	C	T	T
S1A_368801860	T/C	1A	368801860	+	NA	NA	NA	NA	NA	NA	T	Y	T	C	T	T	N	T	T	T	T	Y	C	C	Y	T	T	T	N	T	T	C	Y	T	C	C	T	T	T	T	T	C	T	T	T	Y	T	C	Y
S1A_368801905	G/T	1A	368801905	+	NA	NA	NA	NA	NA	NA	G	K	G	G	G	G	N	K	G	G	G	G	G	G	K	G	G	G	N	G	G	G	G	G	G	G	G	T	G	G	T	G	G	G	K	K	T	G	G
S1A_368801918	G/C	1A	368801918	+	NA	NA	NA	NA	NA	NA	S	G	G	G	S	G	G	G	G	G	C	C	G	G	G	G	C	G	G	G	C	G	G	S	G	G	G	G	C	G	G	G	C	C	S	G	G	G	G
S1A_369082866	A/G	1A	369082866	+	NA	NA	NA	NA	NA	NA	A	A	A	A	A	A	A	A	G	G	A	A	A	A	G	A	A	A	A	A	A	A	A	A	A	A	A	N	A	A	G	A	N	A	A	R	G	A	A
S1A_369272583	C/G	1A	369272583	+	NA	NA	NA	NA	NA	NA	S	S	C	C	G	C	C	S	C	C	G	G	C	C	S	C	G	C	C	C	G	C	C	C	C	C	C	G	G	C	G	C	G	S	C	S	G	C	C
S1A_369499870	A/G	1A	369499870	+	NA	NA	NA	NA	NA	NA	R	A	G	A	A	A	A	G	A	A	A	A	A	A	A	G	A	R	G	G	A	A	A	R	A	A	G	N	A	G	A	A	A	A	R	A	A	A	G
S1A_369499876	T/C	1A	369499876	+	NA	NA	NA	NA	NA	NA	T	Y	T	C	T	C	C	T	C	C	T	T	C	C	T	T	T	Y	T	T	T	C	C	T	C	C	T	N	T	T	T	C	T	Y	Y	Y	T	C	T
S1A_370696569	C/T	1A	370696569	+	NA	NA	NA	NA	NA	NA	Y	C	C	Y	C	C	N	N	N	N	C	C	C	T	C	C	C	C	C	C	N	N	C	C	C	N	N	N	Y	N	N	C	C	T	C	C	N	C	Y
S1A_371945216	A/C	1A	371945216	+	NA	NA	NA	NA	NA	NA	C	M	C	A	M	C	A	C	A	N	A	A	A	A	C	C	A	C	C	C	A	A	M	C	A	A	C	C	A	C	C	A	A	A	C	M	C	A	M
S1A_372554710	A/G	1A	372554710	+	NA	NA	NA	NA	NA	NA	A	R	R	A	R	R	A	R	A	A	R	R	A	A	R	R	R	R	R	R	R	A	R	R	A	A	R	R	R	R	R	A	R	R	A	A	R	A	R
S1A_372643320	A/G	1A	372643320	+	NA	NA	NA	NA	NA	NA	R	R	A	G	A	A	G	A	G	G	A	A	G	G	A	A	A	R	A	A	N	G	R	A	R	G	A	A	A	A	A	G	A	R	A	G	A	G	R
S1A_374216815	A/G	1A	374216815	+	NA	NA	NA	NA	NA	NA	R	R	A	G	A	A	G	A	G	G	N	R	G	G	A	A	A	R	A	A	A	G	R	A	G	G	N	A	A	A	A	N	R	G	A	G	A	G	G
S1A_374257518	G/A	1A	374257518	+	NA	NA	NA	NA	NA	NA	G	G	G	R	G	G	G	G	G	G	G	G	G	R	R	R	N	G	R	R	G	G	G	G	G	G	G	R	G	R	N	G	N	G	G	G	G	G	G
S1A_374257524	C/G	1A	374257524	+	NA	NA	NA	NA	NA	NA	S	C	C	S	S	S	C	C	S	S	C	C	C	C	S	C	N	C	C	C	S	S	G	G	S	C	S	C	S	S	N	C	N	S	C	C	C	C	S
S1A_374257530	A/G	1A	374257530	+	NA	NA	NA	NA	NA	NA	R	A	A	A	A	A	A	A	R	A	R	R	R	R	A	A	N	R	A	A	A	A	A	A	A	A	A	A	A	A	N	R	N	A	R	A	A	R	R
S1A_374257539	G/T	1A	374257539	+	NA	NA	NA	NA	NA	NA	K	G	G	K	K	K	G	G	K	K	G	G	G	G	K	G	N	G	G	G	K	K	T	T	K	G	K	G	K	K	N	G	N	K	G	G	G	G	K
S1A_375468477	G/A	1A	375468477	+	NA	NA	NA	NA	NA	NA	N	R	G	A	G	G	A	G	A	A	G	R	A	A	R	G	G	R	G	G	G	A	R	G	A	A	G	G	G	G	G	A	G	G	G	R	G	A	R
S1A_375471692	A/C	1A	375471692	+	NA	NA	NA	NA	NA	NA	M	C	A	C	A	A	N	A	C	N	N	A	C	C	C	A	A	A	A	A	A	C	A	A	C	C	N	A	A	A	A	C	A	A	N	M	A	C	N
S1A_376476500	G/A	1A	376476500	+	NA	NA	NA	NA	NA	NA	R	R	G	A	G	G	A	G	A	N	G	G	A	A	G	G	G	G	G	G	G	A	R	G	A	A	G	G	G	G	G	A	G	R	G	R	G	A	R
S1A_381273884	A/G	1A	381273884	+	NA	NA	NA	NA	NA	NA	G	R	A	G	A	A	G	A	G	G	A	A	G	G	A	A	A	R	A	A	A	G	R	A	G	G	A	A	A	A	A	G	A	A	A	R	A	G	R
S1A_382741869	C/A	1A	382741869	+	NA	NA	NA	NA	NA	NA	M	M	C	A	C	C	A	C	N	A	C	C	A	A	C	C	N	M	C	C	C	A	C	C	A	A	C	C	C	N	C	A	C	M	C	A	C	A	M
S1A_384336344	C/T	1A	384336344	+	NA	NA	NA	NA	NA	NA	Y	Y	C	Y	C	C	Y	C	C	C	C	C	Y	Y	Y	C	C	C	C	C	C	Y	Y	C	Y	Y	C	C	C	C	C	Y	C	C	C	Y	C	Y	Y
S1A_384775499	A/G	1A	384775499	+	NA	NA	NA	NA	NA	NA	R	R	R	R	A	R	A	R	G	R	R	R	G	R	A	R	R	R	R	R	R	R	G	A	R	R	R	R	R	R	R	R	R	R	R	R	R	A	R
S1A_384775534	A/T	1A	384775534	+	NA	NA	NA	NA	NA	NA	W	W	W	W	A	W	A	W	T	W	W	W	T	W	A	W	W	W	W	W	W	W	T	A	W	W	W	W	W	W	W	W	W	W	W	W	W	A	W
S1A_384775604	G/A	1A	384775604	+	NA	NA	NA	NA	NA	NA	G	R	G	A	G	G	A	G	A	A	G	G	A	A	N	G	G	R	G	G	G	A	R	G	N	A	G	G	G	G	G	A	G	R	G	R	G	A	R
S1A_386245852	A/C	1A	386245852	+	NA	NA	NA	NA	NA	NA	M	M	M	M	C	N	M	M	M	M	M	M	M	M	M	M	C	M	M	M	N	M	M	A	M	M	M	M	A	M	M	M	A	A	M	M	M	M	M
S1A_386245853	T/A	1A	386245853	+	NA	NA	NA	NA	NA	NA	W	W	W	W	A	N	W	W	W	W	W	W	W	W	W	W	A	W	W	W	N	W	W	T	W	W	W	W	T	W	W	W	T	T	W	W	W	W	W
S1A_386245856	T/G	1A	386245856	+	NA	NA	NA	NA	NA	NA	K	K	K	K	G	N	K	K	K	K	K	K	K	K	K	K	G	K	K	K	N	K	K	T	K	K	K	K	T	K	K	K	T	T	K	K	K	K	K
S1A_386477447	A/G	1A	386477447	+	NA	NA	NA	NA	NA	NA	R	R	A	G	N	A	G	A	G	G	A	A	G	G	A	A	A	A	A	A	A	G	A	A	G	G	A	A	A	A	A	G	A	A	A	R	A	G	R
S1A_386870970	C/A	1A	386870970	+	NA	NA	NA	NA	NA	NA	C	M	C	M	M	M	M	M	M	M	C	M	M	M	M	C	M	M	C	A	M	C	C	M	M	M	C	M	M	C	C	C	A	M	M	M	C	M	M
S1A_387811952	A/G	1A	387811952	+	NA	NA	NA	NA	NA	NA	R	A	G	A	R	A	A	G	A	A	A	A	A	A	G	G	A	R	G	G	A	A	A	R	A	A	G	G	A	G	G	A	A	A	R	R	G	A	R
S1A_388537705	A/G	1A	388537705	+	NA	NA	NA	NA	NA	NA	R	R	R	G	A	R	R	A	R	R	R	A	A	R	A	R	A	R	R	R	R	A	A	R	R	A	G	N	R	R	N	R	G	N	R	R	G	R	A
S1A_388537711	A/G	1A	388537711	+	NA	NA	NA	NA	NA	NA	R	R	A	A	G	R	R	R	R	R	R	G	R	R	G	A	R	A	A	A	A	R	R	R	R	R	A	N	A	A	N	A	A	N	R	R	A	R	R
S1A_388939010	G/A	1A	388939010	+	NA	NA	NA	NA	NA	NA	G	R	G	A	G	G	G	R	G	G	N	R	G	G	G	G	N	G	G	N	R	G	G	G	G	G	G	G	G	G	G	G	G	G	G	G	G	G	G
S1A_388939029	T/C	1A	388939029	+	NA	NA	NA	NA	NA	NA	T	Y	T	C	T	T	T	Y	T	T	N	Y	T	T	T	T	N	T	T	N	Y	T	T	T	T	T	T	T	T	T	T	T	T	T	T	T	T	T	T
S1A_395485807	G/A	1A	395485807	+	NA	NA	NA	NA	NA	NA	G	R	A	G	G	G	G	A	G	G	G	G	G	G	R	A	G	A	A	A	G	G	G	R	G	G	N	A	G	A	A	G	G	G	R	R	A	G	R
S1A_396237369	A/C	1A	396237369	+	NA	NA	NA	NA	NA	NA	A	A	A	N	M	M	M	A	A	M	A	A	M	N	N	A	M	A	A	A	M	A	N	N	A	M	A	N	A	A	A	N	M	M	A	M	A	A	M
S1A_396237396	T/C	1A	396237396	+	NA	NA	NA	NA	NA	NA	T	T	T	N	Y	Y	Y	T	T	Y	T	T	Y	N	N	T	Y	T	T	T	Y	T	N	N	T	Y	T	N	T	T	T	N	Y	Y	T	Y	T	T	Y
S1A_396237397	T/A	1A	396237397	+	NA	NA	NA	NA	NA	NA	T	T	T	N	W	W	W	T	T	W	T	T	W	N	N	T	W	T	T	T	W	T	N	N	T	W	T	N	T	T	T	N	W	W	T	W	T	T	W
S1A_399232216	A/T	1A	399232216	+	NA	NA	NA	NA	NA	NA	A	A	A	W	A	W	A	A	A	W	T	W	W	W	A	A	A	A	A	A	W	W	W	A	W	W	A	A	W	A	A	W	W	W	W	W	A	W	W
S1A_402236557	G/A	1A	402236557	+	NA	NA	NA	NA	NA	NA	G	G	G	G	G	A	G	G	G	G	G	R	G	G	G	G	N	G	G	G	A	G	R	G	G	G	G	G	G	G	G	G	G	G	G	G	N	G	G
S1A_402927602	G/A	1A	402927602	+	NA	NA	NA	NA	NA	NA	R	R	A	G	R	G	G	A	G	G	G	G	G	G	G	A	G	R	G	R	G	G	G	G	G	G	R	G	G	R	A	N	G	G	G	R	R	G	R
S1A_402952884	C/A	1A	402952884	+	NA	NA	NA	NA	NA	NA	A	M	A	C	A	C	C	A	C	C	C	C	C	C	A	A	C	M	A	A	C	C	C	A	C	C	A	A	C	A	A	C	C	C	A	M	A	C	M
S1A_402952906	A/G	1A	402952906	+	NA	NA	NA	NA	NA	NA	N	G	G	A	G	A	A	G	N	A	A	A	A	A	N	G	A	R	N	G	A	A	A	R	A	A	G	G	A	G	G	A	A	A	G	R	G	A	R
S1A_405871891	G/A	1A	405871891	+	NA	NA	NA	NA	NA	NA	R	R	R	R	G	G	A	R	A	N	R	R	N	G	G	R	G	R	R	R	G	G	R	R	A	N	R	R	G	R	R	A	G	G	R	R	G	G	R
S1A_412825901	C/T	1A	412825901	+	NA	NA	NA	NA	NA	NA	C	Y	C	C	Y	Y	Y	C	C	C	C	C	C	C	Y	C	C	C	C	C	C	C	C	Y	C	C	C	C	C	C	C	Y	C	C	C	Y	C	C	C
S1A_412825902	G/C	1A	412825902	+	NA	NA	NA	NA	NA	NA	S	S	S	G	G	S	G	S	S	G	S	S	S	S	S	S	S	S	G	G	S	C	S	S	G	G	G	S	S	S	S	S	S	S	S	S	S	G	S
S1A_412825914	T/G	1A	412825914	+	NA	NA	NA	NA	NA	NA	K	K	K	G	K	K	K	K	T	T	K	T	K	T	K	K	T	K	G	G	K	T	K	K	G	K	G	K	K	K	K	K	K	K	K	K	K	K	K
S1A_412825920	G/A	1A	412825920	+	NA	NA	NA	NA	NA	NA	R	R	R	G	G	R	G	R	R	G	R	R	R	R	R	R	R	R	G	G	R	A	R	R	G	G	G	R	R	R	R	R	R	R	R	R	R	G	R
S1A_412825922	C/T	1A	412825922	+	NA	NA	NA	NA	NA	NA	C	C	C	C	C	C	C	C	Y	T	Y	C	Y	Y	C	C	Y	C	C	C	C	C	Y	Y	C	Y	C	C	C	C	C	C	C	C	C	C	C	Y	Y
S1A_412825926	G/A	1A	412825926	+	NA	NA	NA	NA	NA	NA	G	R	R	R	G	G	G	G	G	G	G	G	G	G	R	R	G	G	R	R	R	G	G	G	G	G	R	G	G	R	G	G	G	G	G	R	G	G	G
S1A_412825930	C/G	1A	412825930	+	NA	NA	NA	NA	NA	NA	C	C	C	C	S	C	C	C	C	C	S	C	C	C	C	C	C	C	C	C	C	C	C	C	C	C	C	C	C	C	C	C	S	C	C	C	C	C	S
S1A_412825947	G/A	1A	412825947	+	NA	NA	NA	NA	NA	NA	G	G	G	G	G	G	G	G	R	A	R	G	R	R	G	G	R	G	G	G	G	G	R	R	G	R	G	G	G	G	G	G	G	G	G	G	G	R	R
S1A_417390115	T/C	1A	417390115	+	NA	NA	NA	NA	NA	NA	T	T	T	T	T	Y	T	T	T	T	Y	T	T	T	T	T	T	T	T	T	T	Y	T	Y	T	T	T	T	Y	T	T	Y	Y	Y	Y	T	T	T	T
S1A_418085113	G/T	1A	418085113	+	NA	NA	NA	NA	NA	NA	G	K	G	G	G	K	K	G	G	G	G	K	K	G	G	G	G	G	G	G	G	G	G	G	G	G	G	G	G	G	G	K	G	G	G	K	K	G	G
S1A_418085114	C/T	1A	418085114	+	NA	NA	NA	NA	NA	NA	Y	Y	Y	Y	Y	Y	Y	Y	T	T	Y	Y	Y	Y	T	Y	T	Y	Y	C	T	Y	Y	Y	T	T	Y	Y	Y	C	Y	Y	Y	T	C	Y	Y	Y	Y
S1A_426922978	A/C	1A	426922978	+	NA	NA	NA	NA	NA	NA	M	A	A	A	M	A	A	M	A	A	A	A	N	A	A	A	A	A	A	M	A	M	A	A	A	A	M	A	N	M	A	A	A	A	M	A	A	A	A
S1A_427514118	T/G	1A	427514118	+	NA	NA	NA	NA	NA	NA	T	N	T	T	T	T	N	T	T	T	K	T	T	T	N	N	T	T	T	T	T	T	T	K	T	T	T	T	T	T	T	T	G	N	K	T	T	T	T
S1A_430003431	A/C	1A	430003431	+	NA	NA	NA	NA	NA	NA	A	A	A	A	N	A	N	N	A	C	A	M	A	C	N	A	C	C	A	A	A	C	C	C	A	A	A	A	C	A	A	A	C	N	C	A	C	C	N
S1A_432956741	C/T	1A	432956741	+	NA	NA	NA	NA	NA	NA	C	C	C	C	C	T	C	C	N	C	C	Y	C	C	N	C	T	C	C	C	T	C	T	C	C	C	C	C	C	C	C	C	C	C	C	C	C	C	C
S1A_435729308	T/G	1A	435729308	+	NA	NA	NA	NA	NA	NA	T	K	N	T	G	G	T	G	T	T	T	G	T	T	K	N	N	K	N	G	G	T	G	G	T	T	G	N	T	G	G	T	T	T	K	K	G	N	N
S1A_436882791	C/T	1A	436882791	+	NA	NA	NA	NA	NA	NA	C	C	N	Y	C	N	C	C	C	C	Y	C	C	Y	T	N	Y	C	C	C	C	C	Y	C	C	C	C	N	C	C	C	C	Y	C	Y	C	C	Y	C
S1A_436882810	G/A	1A	436882810	+	NA	NA	NA	NA	NA	NA	G	G	N	R	G	N	G	G	G	G	R	G	G	R	G	N	G	G	G	G	G	G	R	G	G	G	G	N	G	G	G	G	R	G	R	G	G	R	G
S1A_440172362	A/G	1A	440172362	+	NA	NA	NA	NA	NA	NA	R	R	G	A	G	G	N	G	A	A	A	A	A	A	G	G	N	R	G	G	N	N	R	G	A	A	G	G	N	G	G	A	A	N	G	R	G	A	R
S1A_440183259	C/T	1A	440183259	+	NA	NA	NA	NA	NA	NA	N	C	C	Y	Y	C	Y	C	C	C	C	C	Y	C	C	C	Y	C	C	N	Y	C	C	Y	C	C	C	C	T	C	C	N	Y	Y	Y	Y	Y	C	C
S1A_449765340	T/G	1A	449765340	+	NA	NA	NA	NA	NA	NA	N	T	T	T	T	T	T	T	T	T	T	K	T	T	T	T	T	T	T	N	T	N	T	N	T	T	T	N	T	T	K	T	N	N	N	T	N	N	K
S1A_451616517	A/G	1A	451616517	+	NA	NA	NA	NA	NA	NA	A	R	A	A	A	A	A	A	A	A	A	A	G	R	R	N	A	A	N	A	A	A	R	A	G	A	A	G	A	A	G	A	A	A	R	A	G	G	A
S1A_451618946	A/G	1A	451618946	+	NA	NA	NA	NA	NA	NA	A	R	A	A	A	A	A	A	A	A	A	R	G	R	G	A	A	A	A	A	A	A	A	A	G	A	A	G	A	A	G	A	A	A	R	A	G	G	A
S1A_452859355	T/A	1A	452859355	+	NA	NA	NA	NA	NA	NA	T	W	T	T	T	T	T	T	T	T	T	T	T	T	A	T	T	T	T	T	T	T	T	T	T	T	T	A	T	T	A	T	T	T	W	W	A	T	T
S1A_454110176	T/C	1A	454110176	+	NA	NA	NA	NA	NA	NA	T	Y	T	T	T	T	T	T	T	T	T	T	T	T	C	T	T	T	T	T	T	T	T	T	T	T	T	C	T	T	C	T	T	T	Y	Y	C	T	T
S1A_455048986	C/T	1A	455048986	+	NA	NA	NA	NA	NA	NA	C	T	C	Y	C	C	Y	N	C	N	Y	Y	C	C	C	C	Y	N	N	C	C	C	C	T	C	Y	C	N	Y	C	C	C	Y	C	Y	Y	N	C	Y
S1A_455048998	A/G	1A	455048998	+	NA	NA	NA	NA	NA	NA	A	A	A	A	A	A	A	N	A	N	R	R	A	A	A	A	R	N	N	A	A	A	A	G	A	A	A	N	R	A	A	A	R	A	R	A	N	A	A
S1A_455049009	A/G	1A	455049009	+	NA	NA	NA	NA	NA	NA	A	G	A	R	A	A	R	N	A	N	R	R	A	A	R	A	R	N	N	A	A	A	A	G	A	R	A	N	R	A	G	A	R	A	R	R	N	A	R
S1A_455049024	C/T	1A	455049024	+	NA	NA	NA	NA	NA	NA	C	T	C	Y	C	C	Y	N	C	N	Y	Y	C	C	C	C	C	N	N	C	C	C	C	C	C	Y	C	N	C	C	C	C	C	C	Y	Y	N	C	Y
S1A_455049034	A/G	1A	455049034	+	NA	NA	NA	NA	NA	NA	A	G	A	R	R	A	R	N	A	N	R	R	A	A	A	A	R	N	N	G	A	A	A	G	A	R	G	N	R	G	A	A	R	A	R	R	N	A	R
S1A_456205545	C/T	1A	456205545	+	NA	NA	NA	NA	NA	NA	C	T	C	C	C	C	C	C	C	C	C	C	C	C	Y	C	N	C	N	C	C	C	C	C	C	C	N	T	C	C	T	C	C	C	C	N	T	C	C
S1A_456205581	C/T	1A	456205581	+	NA	NA	NA	NA	NA	NA	C	T	C	C	C	C	C	C	C	C	C	C	C	C	Y	C	N	C	N	C	C	C	C	C	C	C	N	T	C	C	T	C	C	C	C	N	T	C	C
S1A_457374257	G/T	1A	457374257	+	NA	NA	NA	NA	NA	NA	G	K	G	G	G	G	G	G	G	G	G	G	G	G	K	G	G	G	G	G	G	G	G	G	G	G	G	T	G	G	T	G	G	G	G	G	T	G	G
S1A_457824584	T/G	1A	457824584	+	NA	NA	NA	NA	NA	NA	T	K	T	T	T	T	T	T	T	T	T	T	T	T	K	T	T	T	T	T	T	T	T	N	T	T	T	G	T	T	G	T	T	T	T	K	G	T	T
S1A_457945983	T/G	1A	457945983	+	NA	NA	NA	NA	NA	NA	T	T	T	T	T	T	T	T	T	T	T	T	T	T	G	N	T	T	N	T	T	T	N	T	T	T	T	G	T	T	G	T	T	T	N	K	N	N	T
S1A_458984888	G/C	1A	458984888	+	NA	NA	NA	NA	NA	NA	N	G	G	G	G	G	G	G	G	G	G	G	G	G	C	G	G	G	G	G	G	G	S	G	G	G	G	C	G	G	C	G	G	G	G	G	C	G	G
S1A_459272915	C/A	1A	459272915	+	NA	NA	NA	NA	NA	NA	C	M	C	C	C	C	C	C	C	C	C	C	C	C	M	C	C	C	C	C	C	C	M	C	C	C	C	A	C	C	A	C	C	C	M	M	A	C	C
S1A_459272938	C/T	1A	459272938	+	NA	NA	NA	NA	NA	NA	C	Y	C	C	C	C	C	C	C	C	C	C	C	C	Y	C	C	C	C	C	C	C	Y	C	C	C	C	T	C	C	T	C	C	C	Y	Y	T	C	C
S1A_459757302	A/G	1A	459757302	+	NA	NA	NA	NA	NA	NA	A	R	N	A	R	A	N	A	G	R	A	N	A	A	A	N	A	A	A	A	R	A	A	A	N	A	A	A	A	A	A	A	A	A	A	A	A	A	A
S1A_459757324	A/G	1A	459757324	+	NA	NA	NA	NA	NA	NA	A	A	N	R	A	A	N	A	A	R	R	N	A	A	A	N	A	A	A	A	A	A	A	A	N	A	A	A	A	A	A	A	A	G	A	A	A	R	A
S1A_460637199	A/G	1A	460637199	+	NA	NA	NA	NA	NA	NA	A	R	A	A	A	A	A	A	A	A	A	A	N	A	A	A	N	A	A	A	A	A	A	A	A	A	A	G	A	A	G	A	A	A	R	A	G	A	A
S1A_460955206	G/C	1A	460955206	+	NA	NA	NA	NA	NA	NA	G	G	N	G	G	G	G	G	G	G	G	N	G	N	N	G	G	G	G	G	G	G	G	G	G	G	G	C	G	N	C	G	G	G	G	G	C	G	G
S1A_460955227	A/G	1A	460955227	+	NA	NA	NA	NA	NA	NA	A	A	N	A	A	A	A	A	A	A	A	N	A	N	N	A	A	A	A	A	A	A	A	A	A	A	A	G	A	N	G	A	A	A	A	A	G	A	A
S1A_461775969	G/C	1A	461775969	+	NA	NA	NA	NA	NA	NA	G	S	G	G	G	G	G	G	G	G	G	G	G	G	S	G	G	G	G	G	N	G	G	G	G	G	G	C	G	G	C	G	G	G	G	G	C	G	G
S1A_462390958	C/T	1A	462390958	+	NA	NA	NA	NA	NA	NA	N	C	C	C	C	T	C	C	T	T	T	C	C	C	C	C	C	C	C	C	C	C	C	Y	N	T	C	N	T	C	N	C	T	C	C	C	N	C	Y
S1A_462617163	C/T	1A	462617163	+	NA	NA	NA	NA	NA	NA	Y	Y	T	C	T	T	C	N	T	T	T	C	C	C	Y	T	C	N	T	N	N	T	N	T	C	T	T	N	T	T	T	C	T	T	T	C	T	C	T
S1A_462699022	C/G	1A	462699022	+	NA	NA	NA	NA	NA	NA	S	S	C	G	C	C	G	C	S	C	C	G	G	G	S	C	G	C	C	C	G	C	C	C	G	C	C	C	C	C	C	G	C	S	S	G	C	G	C
S1A_463407231	T/C	1A	463407231	+	NA	NA	NA	NA	NA	NA	C	T	T	T	T	T	T	T	T	T	T	Y	T	T	T	T	C	T	T	T	C	T	T	T	T	T	T	T	T	T	T	T	T	T	T	T	T	T	T
S1A_463431306	T/C	1A	463431306	+	NA	NA	NA	NA	NA	NA	Y	Y	T	T	T	Y	Y	T	T	C	T	Y	T	Y	Y	T	Y	Y	N	T	Y	Y	T	T	T	T	T	Y	T	T	Y	T	T	Y	T	Y	C	Y	T
S1A_464227534	A/G	1A	464227534	+	NA	NA	NA	NA	NA	NA	A	A	A	N	G	A	N	G	A	N	A	R	G	G	N	A	A	G	N	A	A	A	G	G	G	A	N	A	A	A	R	A	A	A	R	A	A	G	G
S1A_465270762	G/C	1A	465270762	+	NA	NA	NA	NA	NA	NA	G	G	S	G	G	G	G	G	G	N	G	G	G	G	G	S	G	G	S	S	G	G	G	G	G	G	S	G	G	S	G	G	G	G	G	G	G	G	G
S1A_465270766	G/A	1A	465270766	+	NA	NA	NA	NA	NA	NA	G	G	R	G	G	G	G	G	G	N	G	G	G	G	G	R	G	G	R	R	G	G	G	G	G	G	R	G	G	R	G	G	G	G	G	G	G	G	G
S1A_466844357	C/A	1A	466844357	+	NA	NA	NA	NA	NA	NA	C	M	M	A	N	M	A	C	M	M	A	M	C	M	C	M	N	M	C	M	A	M	N	M	A	M	C	C	M	C	M	M	C	C	M	A	C	C	M
S1A_468459872	T/C	1A	468459872	+	NA	NA	NA	NA	NA	NA	Y	Y	Y	Y	Y	Y	N	Y	Y	Y	Y	Y	Y	Y	Y	T	Y	Y	Y	T	Y	Y	T	Y	Y	Y	C	Y	Y	Y	Y	Y	Y	Y	T	Y	Y	Y	Y
S1A_468459884	C/T	1A	468459884	+	NA	NA	NA	NA	NA	NA	Y	Y	Y	Y	Y	Y	N	Y	Y	Y	Y	Y	Y	Y	Y	C	Y	Y	Y	C	Y	Y	C	Y	Y	Y	T	Y	Y	Y	Y	Y	Y	Y	C	Y	Y	Y	Y
S1A_471476612	T/C	1A	471476612	+	NA	NA	NA	NA	NA	NA	T	T	Y	Y	T	Y	T	Y	Y	Y	T	T	T	T	T	Y	Y	T	T	Y	T	T	Y	T	Y	T	Y	T	Y	Y	Y	T	T	Y	T	T	T	Y	Y
S1A_471476640	G/A	1A	471476640	+	NA	NA	NA	NA	NA	NA	R	R	R	G	G	R	R	R	R	R	R	R	G	G	G	G	G	G	R	R	G	G	G	G	R	G	R	R	G	R	G	R	G	G	G	G	G	G	R
S1A_471489501	G/C	1A	471489501	+	NA	NA	NA	NA	NA	NA	G	S	G	G	G	G	C	G	G	G	G	G	G	G	G	G	G	G	G	G	G	G	G	G	G	G	G	G	G	G	G	C	G	G	G	C	G	G	G
S1A_471504145	C/T	1A	471504145	+	NA	NA	NA	NA	NA	NA	C	C	C	Y	C	C	C	C	Y	Y	C	Y	C	C	C	C	C	C	C	C	C	C	C	C	T	C	C	C	C	C	C	C	C	C	C	C	C	Y	C
S1A_471700659	C/T	1A	471700659	+	NA	NA	NA	NA	NA	NA	Y	Y	T	T	T	C	C	T	Y	C	C	T	T	T	T	T	C	T	T	Y	C	C	N	T	T	C	N	T	C	Y	T	C	C	Y	Y	Y	T	T	Y
S1A_471700717	C/G	1A	471700717	+	NA	NA	NA	NA	NA	NA	S	S	C	C	C	G	G	C	G	G	G	C	C	C	S	C	G	C	C	C	G	G	C	S	C	G	C	C	G	C	C	G	G	S	C	S	C	C	C
S1A_471940418	T/C	1A	471940418	+	NA	NA	NA	NA	NA	NA	T	T	T	T	T	Y	T	T	T	Y	Y	T	T	T	N	T	T	T	T	T	Y	Y	T	T	T	Y	T	T	Y	T	T	T	Y	T	T	T	T	T	Y
S1A_472430336	A/G	1A	472430336	+	NA	NA	NA	NA	NA	NA	A	A	A	N	A	A	A	A	A	A	A	A	A	A	G	A	G	A	A	A	G	N	A	A	A	A	A	A	N	A	A	A	N	R	N	A	A	N	A
S1A_473009891	T/C	1A	473009891	+	NA	NA	NA	NA	NA	NA	T	Y	T	T	T	T	C	T	T	T	N	T	T	T	N	T	N	T	T	T	T	T	T	T	T	T	T	T	T	T	T	C	T	T	T	Y	T	N	T
S1A_474172048	G/A	1A	474172048	+	NA	NA	NA	NA	NA	NA	G	G	G	G	G	G	G	G	G	G	R	R	G	R	R	G	G	G	G	G	R	G	G	G	A	G	G	G	R	G	G	R	G	G	G	G	G	G	G
S1A_474172056	C/T	1A	474172056	+	NA	NA	NA	NA	NA	NA	C	C	C	C	C	C	C	C	C	C	Y	Y	C	Y	Y	C	C	C	C	C	Y	C	C	C	T	C	C	C	Y	C	C	Y	C	C	C	C	C	C	C
S1A_474451217	C/T	1A	474451217	+	NA	NA	NA	NA	NA	NA	Y	C	C	C	C	T	T	C	Y	T	T	C	C	C	T	C	T	C	C	C	T	Y	C	C	C	T	C	C	T	C	C	T	T	T	C	T	C	C	Y
S1A_474553636	A/G	1A	474553636	+	NA	NA	NA	NA	NA	NA	A	R	A	A	A	A	N	A	A	A	A	A	A	A	A	A	A	A	N	A	A	A	A	N	A	A	A	A	A	A	A	G	A	A	A	R	A	A	A
S1A_474555860	C/T	1A	474555860	+	NA	NA	NA	NA	NA	NA	C	C	C	C	C	T	C	C	Y	T	T	C	C	C	Y	C	T	C	C	C	T	C	C	Y	C	T	C	C	T	C	C	C	T	Y	C	C	C	C	Y
S1A_474795403	G/T	1A	474795403	+	NA	NA	NA	NA	NA	NA	G	G	G	N	G	N	N	G	G	N	N	G	G	G	G	G	G	G	G	G	G	G	G	G	G	N	G	G	N	G	G	T	N	G	K	K	G	G	G
S1A_475312512	T/C	1A	475312512	+	NA	NA	NA	NA	NA	NA	T	T	T	Y	T	T	T	T	T	Y	T	Y	T	T	N	T	T	T	T	T	T	T	T	T	Y	T	T	T	N	Y	T	T	T	T	T	T	T	Y	T
S1A_476902214	C/G	1A	476902214	+	NA	NA	NA	NA	NA	NA	C	C	C	S	C	C	C	C	C	G	C	C	C	C	C	C	C	C	C	C	N	C	C	C	S	C	C	C	C	C	C	C	C	C	C	C	C	C	C
S1A_476902223	G/C	1A	476902223	+	NA	NA	NA	NA	NA	NA	G	G	G	S	G	G	G	G	G	C	G	G	G	G	G	G	G	G	G	G	N	G	G	G	S	G	G	G	G	G	G	G	G	G	G	G	G	G	G
S1A_476982486	T/C	1A	476982486	+	NA	NA	NA	NA	NA	NA	Y	Y	T	C	T	T	C	T	T	T	T	T	T	T	T	T	T	T	T	T	T	T	T	T	T	T	T	T	T	T	T	C	T	T	T	Y	T	T	T
S1A_476982492	C/G	1A	476982492	+	NA	NA	NA	NA	NA	NA	S	S	C	G	C	C	G	C	C	C	C	C	C	C	C	C	C	C	C	C	C	C	C	C	C	C	C	C	C	C	C	G	C	C	C	S	C	C	C
S1A_476982505	A/G	1A	476982505	+	NA	NA	NA	NA	NA	NA	R	R	A	G	A	A	G	A	A	A	A	A	A	A	A	A	A	A	A	A	A	A	A	A	A	A	A	A	A	A	A	G	A	A	A	R	A	A	A
S1A_476983192	G/A	1A	476983192	+	NA	NA	NA	NA	NA	NA	A	A	G	N	G	G	A	G	G	G	G	G	G	G	G	G	G	G	G	G	G	G	G	G	G	G	G	G	G	G	G	A	G	G	G	R	G	G	G
S1A_476985289	A/G	1A	476985289	+	NA	NA	NA	NA	NA	NA	R	A	A	A	G	A	A	G	R	A	A	G	G	G	R	A	G	G	A	A	G	A	G	G	G	A	A	A	A	A	A	A	A	R	R	A	A	G	A
S1A_477355371	G/A	1A	477355371	+	NA	NA	NA	NA	NA	NA	G	G	G	G	G	G	G	G	G	G	G	G	R	G	N	G	N	G	G	G	R	G	G	R	N	G	R	N	G	G	G	N	G	G	N	G	R	G	G
S1A_477699717	G/C	1A	477699717	+	NA	NA	NA	NA	NA	NA	G	C	C	G	G	G	G	G	G	G	G	G	G	G	S	C	G	G	C	C	G	C	G	G	G	G	C	C	N	C	C	G	G	S	S	S	C	G	G
S1A_477728609	T/A	1A	477728609	+	NA	NA	NA	NA	NA	NA	T	T	T	T	T	A	T	T	A	A	A	T	T	T	T	T	T	T	T	T	T	T	T	W	T	A	T	T	A	T	T	T	A	T	W	T	T	T	A
S1A_477937227	C/T	1A	477937227	+	NA	NA	NA	NA	NA	NA	N	T	T	C	C	C	C	C	C	C	C	C	C	T	N	T	C	C	T	T	C	T	C	C	C	C	T	T	C	T	T	C	C	Y	C	C	T	C	C
S1A_478261811	C/T	1A	478261811	+	NA	NA	NA	NA	NA	NA	C	Y	T	C	C	T	C	C	T	N	T	C	C	C	Y	T	C	C	T	T	Y	T	C	Y	C	T	N	T	T	T	T	C	N	Y	Y	C	T	C	Y
S1A_478465809	C/G	1A	478465809	+	NA	NA	NA	NA	NA	NA	S	C	S	C	C	C	C	S	S	S	C	C	S	S	C	S	S	S	S	S	C	S	C	S	S	S	S	C	S	S	C	C	S	S	C	C	C	S	C
S1A_478465831	C/T	1A	478465831	+	NA	NA	NA	NA	NA	NA	Y	C	Y	C	C	C	C	Y	Y	Y	C	C	Y	Y	C	Y	Y	Y	Y	Y	C	Y	C	Y	Y	Y	Y	C	Y	Y	C	C	Y	Y	C	C	C	Y	C
S1A_478465839	G/A	1A	478465839	+	NA	NA	NA	NA	NA	NA	R	G	R	G	G	G	G	R	R	R	G	G	R	R	G	R	R	R	R	R	G	R	G	R	R	R	R	G	R	R	G	G	R	R	G	G	G	R	G
S1A_478567414	G/A	1A	478567414	+	NA	NA	NA	NA	NA	NA	R	G	G	G	A	G	G	A	N	G	G	A	N	N	N	G	A	N	G	G	A	G	A	A	A	G	G	G	G	G	N	G	G	R	A	G	G	A	R
S1A_479840228	C/T	1A	479840228	+	NA	NA	NA	NA	NA	NA	C	Y	T	C	C	C	C	C	C	C	C	C	C	Y	T	T	C	C	T	T	C	T	C	C	C	C	T	T	C	T	T	C	C	T	C	Y	T	C	C
S1A_480826969	A/G	1A	480826969	+	NA	NA	NA	NA	NA	NA	A	R	G	A	A	A	A	A	A	A	A	A	A	A	R	G	A	A	G	G	A	G	A	A	A	A	G	G	A	G	G	A	A	R	A	A	G	A	A
S1A_480934170	T/C	1A	480934170	+	NA	NA	NA	NA	NA	NA	T	Y	C	T	T	T	T	T	T	T	T	T	T	T	Y	C	T	N	C	C	T	C	T	T	T	T	C	C	T	C	C	T	T	Y	T	Y	C	T	T
S1A_481216530	T/A	1A	481216530	+	NA	NA	NA	NA	NA	NA	T	T	T	T	W	N	T	T	T	T	T	T	T	T	T	T	T	W	T	T	T	T	T	N	N	W	T	T	T	T	N	T	T	W	N	T	T	T	A
S1A_481243258	G/T	1A	481243258	+	NA	NA	NA	NA	NA	NA	G	G	G	G	G	K	G	G	K	K	K	G	G	K	G	G	G	G	G	G	G	G	G	K	G	K	G	G	T	G	G	G	K	G	G	G	G	G	G
S1A_481243284	A/T	1A	481243284	+	NA	NA	NA	NA	NA	NA	A	A	A	A	A	W	A	A	W	W	W	A	A	W	A	A	A	A	A	A	A	A	A	W	A	W	A	A	T	A	A	A	W	A	A	A	A	A	A
S1A_481243399	A/G	1A	481243399	+	NA	NA	NA	NA	NA	NA	N	G	R	N	A	R	A	A	R	G	R	N	A	R	R	R	N	A	R	R	A	R	A	A	A	R	R	R	R	R	A	A	G	N	R	R	R	A	R
S1A_481676320	C/A	1A	481676320	+	NA	NA	NA	NA	NA	NA	M	C	C	M	C	C	C	C	C	C	M	C	M	C	M	M	M	M	C	C	M	C	M	C	C	C	C	C	C	C	C	C	C	C	C	C	C	M	C
S1A_481757962	C/T	1A	481757962	+	NA	NA	NA	NA	NA	NA	C	C	C	C	C	T	C	C	C	C	T	C	C	C	C	C	C	C	C	C	C	Y	C	Y	C	T	C	C	T	C	C	C	T	C	C	C	C	C	Y
S1A_482086290	T/C	1A	482086290	+	NA	NA	NA	NA	NA	NA	T	Y	C	T	N	T	T	N	T	T	T	T	T	T	Y	C	T	N	C	C	T	N	T	N	T	N	C	Y	T	C	T	T	N	Y	T	Y	Y	T	T
S1A_482086310	G/A	1A	482086310	+	NA	NA	NA	NA	NA	NA	G	R	A	G	N	G	G	N	G	G	G	G	G	G	R	A	G	N	A	A	G	N	G	N	G	N	A	R	G	A	G	G	N	R	G	R	R	G	G
S1A_482770001	T/C	1A	482770001	+	NA	NA	NA	NA	NA	NA	T	T	T	T	T	Y	T	T	T	T	C	T	T	Y	T	T	T	T	T	T	T	T	T	Y	T	C	N	T	C	T	T	T	C	T	Y	T	T	T	C
S1A_482770012	G/A	1A	482770012	+	NA	NA	NA	NA	NA	NA	R	G	G	G	G	R	G	G	G	G	G	G	G	R	R	G	G	G	G	G	G	R	R	G	G	G	N	G	G	G	G	G	G	R	G	G	G	R	G
S1A_482817097	T/A	1A	482817097	+	NA	NA	NA	NA	NA	NA	N	T	T	T	N	T	T	A	A	T	T	A	A	W	T	T	T	A	N	T	T	N	A	W	A	T	T	N	T	T	N	T	T	T	W	T	T	N	T
S1A_483025050	G/A	1A	483025050	+	NA	NA	NA	NA	NA	NA	G	G	G	A	G	G	G	G	G	A	G	G	G	G	G	G	G	G	G	G	G	R	G	G	G	G	G	N	G	G	G	G	G	G	G	G	G	G	G
S1A_483605087	C/A	1A	483605087	+	NA	NA	NA	NA	NA	NA	M	C	C	C	A	C	C	A	N	C	C	A	A	M	C	C	C	A	C	C	C	A	A	M	A	C	C	C	C	C	C	C	C	C	M	C	C	A	M
S1A_483633771	T/C	1A	483633771	+	NA	NA	NA	NA	NA	NA	Y	T	T	Y	Y	T	T	Y	Y	Y	T	Y	Y	Y	T	T	T	Y	T	T	T	Y	Y	Y	Y	T	T	T	T	T	T	T	T	T	Y	T	T	Y	T
S1A_484300594	T/G	1A	484300594	+	NA	NA	NA	NA	NA	NA	K	T	T	G	T	G	T	T	K	G	G	T	T	T	T	T	T	T	T	T	T	T	T	K	T	G	T	T	G	T	T	T	G	T	K	T	T	T	K
S1A_485182548	T/G	1A	485182548	+	NA	NA	NA	NA	NA	NA	K	T	T	G	T	G	T	T	K	N	G	T	T	K	T	T	T	T	T	T	T	T	T	K	T	G	T	T	G	T	T	T	G	G	K	T	T	T	K
S1A_487313568	C/T	1A	487313568	+	NA	NA	NA	NA	NA	NA	Y	C	C	T	C	T	N	C	Y	T	T	C	C	Y	C	C	C	C	C	C	C	T	C	Y	C	T	C	C	T	N	C	C	T	Y	Y	C	C	C	Y
S1A_487470938	A/C	1A	487470938	+	NA	NA	NA	NA	NA	NA	A	A	A	A	N	C	N	A	A	A	C	A	A	M	A	A	A	N	A	A	A	A	A	N	N	C	A	N	C	A	A	A	C	A	M	A	A	A	A
S1A_487471000	G/C	1A	487471000	+	NA	NA	NA	NA	NA	NA	G	G	G	C	G	G	G	G	S	C	G	G	G	G	G	G	G	G	G	G	G	G	G	G	G	G	G	G	G	G	G	G	G	S	G	G	G	G	G
S1A_488778382	A/G	1A	488778382	+	NA	NA	NA	NA	NA	NA	A	A	A	G	R	R	A	R	R	R	R	R	R	R	A	R	R	R	R	R	A	R	R	G	G	R	R	A	R	R	A	A	A	A	A	A	A	R	N
S1A_489164608	G/T	1A	489164608	+	NA	NA	NA	NA	NA	NA	G	K	T	G	G	G	G	G	G	G	G	G	G	G	T	T	G	G	T	T	G	N	G	G	G	G	T	N	G	N	T	G	N	G	K	K	T	G	G
S1A_489243450	G/C	1A	489243450	+	NA	NA	NA	NA	NA	NA	G	S	G	G	G	G	C	G	G	G	G	G	G	G	G	G	G	G	G	G	G	G	G	G	G	G	G	G	G	G	G	C	G	G	S	S	G	N	G
S1A_489270483	G/A	1A	489270483	+	NA	NA	NA	NA	NA	NA	R	G	G	G	N	G	G	G	N	N	G	N	N	R	N	N	G	R	G	G	G	G	R	G	R	G	N	G	G	G	G	N	G	G	G	G	G	A	R
S1A_490112421	G/A	1A	490112421	+	NA	NA	NA	NA	NA	NA	R	R	G	G	G	G	R	G	G	G	G	G	G	G	G	G	G	G	G	G	G	G	G	G	G	G	N	G	G	G	G	R	G	R	G	R	G	G	G
S1A_490516043	C/T	1A	490516043	+	NA	NA	NA	NA	NA	NA	C	C	C	C	N	C	C	C	C	C	C	C	Y	C	Y	C	C	C	N	C	Y	C	C	C	C	C	C	Y	C	C	T	C	C	N	Y	Y	C	N	C
S1A_490519861	G/A	1A	490519861	+	NA	NA	NA	NA	NA	NA	G	G	G	G	G	G	R	G	G	G	G	G	R	G	A	G	G	G	G	N	A	G	G	G	G	N	G	G	G	G	R	G	G	G	G	R	G	G	G
S1A_490519871	C/T	1A	490519871	+	NA	NA	NA	NA	NA	NA	C	C	C	C	C	C	Y	C	C	C	C	C	Y	C	T	C	C	C	C	N	T	C	C	C	C	N	C	C	C	C	Y	C	C	C	C	Y	C	C	C
S1A_490519891	G/T	1A	490519891	+	NA	NA	NA	NA	NA	NA	G	G	G	G	G	G	K	G	G	G	G	G	K	G	T	G	G	G	G	N	T	G	G	G	G	N	G	G	G	G	K	G	G	G	G	K	G	G	G
S1A_491359095	C/G	1A	491359095	+	NA	NA	NA	NA	NA	NA	C	N	N	N	C	G	C	C	S	C	C	G	C	S	N	C	C	C	C	C	C	C	N	C	C	C	C	C	C	C	C	N	C	G	C	C	C	S	C
S1A_493289190	C/T	1A	493289190	+	NA	NA	NA	NA	NA	NA	C	Y	C	C	Y	Y	Y	C	Y	C	Y	C	C	C	C	C	C	Y	C	C	Y	C	Y	C	Y	Y	C	C	C	C	C	C	C	Y	Y	Y	C	C	Y
S1A_493289192	G/A	1A	493289192	+	NA	NA	NA	NA	NA	NA	G	R	G	R	R	G	G	R	G	R	R	R	R	G	G	G	R	G	G	G	G	R	R	G	R	G	R	G	G	G	R	G	R	G	R	R	G	R	R
S1A_493289193	C/T	1A	493289193	+	NA	NA	NA	NA	NA	NA	C	Y	Y	Y	C	C	Y	Y	Y	C	C	Y	Y	Y	Y	C	Y	Y	C	C	C	C	C	Y	C	Y	C	Y	Y	C	Y	Y	Y	Y	Y	Y	Y	Y	C
S1A_493289200	A/G	1A	493289200	+	NA	NA	NA	NA	NA	NA	R	A	A	A	A	R	A	A	A	A	A	A	A	A	A	A	A	A	A	A	A	A	A	A	A	A	A	A	A	A	A	A	A	A	A	A	A	A	A
S1A_493289205	C/T	1A	493289205	+	NA	NA	NA	NA	NA	NA	Y	C	C	C	C	Y	C	C	C	Y	Y	C	C	C	C	Y	C	Y	Y	Y	C	Y	C	C	Y	C	Y	C	C	C	C	C	C	C	C	C	C	C	C
S1A_493289232	G/A	1A	493289232	+	NA	NA	NA	NA	NA	NA	G	R	R	R	G	G	R	R	R	G	G	R	R	R	R	G	R	R	G	G	G	G	G	R	G	R	G	R	R	G	R	R	R	R	R	R	R	R	G
S1A_493289248	T/A	1A	493289248	+	NA	NA	NA	NA	NA	NA	W	W	W	W	T	W	W	W	W	W	W	W	W	W	W	W	W	W	W	W	T	W	T	W	W	W	W	W	W	T	W	W	W	W	W	W	W	W	T
S1A_493815874	C/A	1A	493815874	+	NA	NA	NA	NA	NA	NA	C	M	A	C	C	C	C	C	C	C	C	C	C	C	A	A	C	C	A	A	C	C	C	C	C	C	A	A	C	A	A	C	C	C	M	M	A	C	C
S1A_493935586	A/G	1A	493935586	+	NA	NA	NA	NA	NA	NA	R	A	A	A	A	A	A	A	A	N	A	A	A	A	A	A	A	A	A	A	A	A	A	A	A	G	A	A	A	A	A	A	A	A	A	A	A	A	R
S1A_493935591	A/G	1A	493935591	+	NA	NA	NA	NA	NA	NA	R	R	G	A	G	A	A	G	A	N	A	A	A	A	G	G	A	R	G	G	A	A	A	R	A	A	G	G	A	G	G	A	A	A	G	R	G	A	R
S1A_493935651	C/T	1A	493935651	+	NA	NA	NA	NA	NA	NA	Y	C	C	C	C	C	C	C	C	C	C	C	C	C	C	C	C	C	C	C	C	C	C	C	C	T	C	C	N	C	C	C	C	C	C	C	C	C	C
S1A_494392057	C/T	1A	494392057	+	NA	NA	NA	NA	NA	NA	T	Y	T	C	N	C	C	T	C	C	C	C	N	C	T	T	C	Y	T	T	C	N	C	T	C	C	T	T	C	T	T	C	C	C	T	Y	T	C	Y
S1A_494393037	A/G	1A	494393037	+	NA	NA	NA	NA	NA	NA	G	R	G	A	G	A	A	G	A	A	A	A	A	A	G	G	A	G	G	G	A	A	A	A	N	A	G	G	A	G	N	A	A	N	G	A	G	A	G
S1A_494434656	G/A	1A	494434656	+	NA	NA	NA	NA	NA	NA	G	R	R	R	N	R	R	R	G	G	R	R	G	G	G	R	G	G	R	R	G	G	R	R	R	G	R	R	G	R	A	R	G	G	R	G	N	G	R
S1A_494442290	T/C	1A	494442290	+	NA	NA	NA	NA	NA	NA	Y	Y	C	T	C	T	T	C	T	T	T	T	T	T	N	C	T	Y	C	C	T	T	T	C	T	T	C	C	T	C	C	T	T	T	C	C	C	T	Y
S1A_494799791	A/C	1A	494799791	+	NA	NA	NA	NA	NA	NA	M	A	A	A	A	A	A	A	A	N	A	A	A	A	A	A	A	A	A	A	A	A	A	A	A	C	A	A	A	A	A	A	A	A	A	A	A	A	M
S1A_494799943	C/G	1A	494799943	+	NA	NA	NA	NA	NA	NA	C	S	C	C	C	C	G	C	C	C	C	C	C	C	C	C	C	C	C	C	C	C	C	C	C	C	C	C	C	C	C	G	C	C	C	S	C	C	C
S1A_495283626	T/C	1A	495283626	+	NA	NA	NA	NA	NA	NA	Y	T	T	N	T	T	T	T	T	T	T	T	T	N	T	T	T	T	T	T	T	T	T	T	T	C	N	T	T	T	T	T	T	T	T	T	T	T	C
S1A_496080282	A/T	1A	496080282	+	NA	NA	NA	NA	NA	NA	A	A	A	A	A	A	A	A	W	A	A	T	T	A	A	A	A	W	A	A	A	A	T	A	T	A	A	A	A	A	A	A	A	A	A	A	A	T	A
S1A_496648729	T/C	1A	496648729	+	NA	NA	NA	NA	NA	NA	T	T	T	C	T	N	T	T	Y	C	C	T	T	Y	Y	T	C	T	T	T	N	T	T	N	T	T	T	T	C	T	T	N	C	N	N	T	T	N	T
S1A_497201550	T/C	1A	497201550	+	NA	NA	NA	NA	NA	NA	T	T	T	N	T	C	T	N	N	C	C	T	T	T	T	T	T	T	T	T	T	T	T	Y	T	T	T	N	C	T	T	T	C	T	Y	T	T	T	T
S1A_497201595	A/T	1A	497201595	+	NA	NA	NA	NA	NA	NA	A	A	A	T	N	T	A	A	W	T	N	A	A	N	A	A	A	A	A	A	A	A	A	W	A	A	A	A	T	A	A	A	N	A	W	A	N	A	N
S1A_497201682	A/G	1A	497201682	+	NA	NA	NA	NA	NA	NA	A	A	A	G	A	G	A	A	G	G	N	A	A	R	N	A	N	A	N	A	N	A	A	A	A	A	A	A	G	A	A	A	G	A	A	A	A	A	A
S1A_497221140	G/C	1A	497221140	+	NA	NA	NA	NA	NA	NA	C	G	G	C	N	G	G	N	N	N	G	G	G	G	C	G	C	G	G	G	C	N	G	N	G	C	G	C	G	G	C	S	G	G	S	N	C	G	C
S1A_497221169	C/T	1A	497221169	+	NA	NA	NA	NA	NA	NA	T	C	C	T	N	C	C	N	N	N	C	C	C	C	T	C	T	C	C	C	T	N	C	N	C	T	C	T	C	C	T	Y	C	C	Y	N	T	C	T
S1A_497499071	G/C	1A	497499071	+	NA	NA	NA	NA	NA	NA	G	S	G	G	G	C	C	G	S	C	C	G	G	S	G	G	C	G	G	G	S	G	G	S	G	G	G	G	C	G	G	S	C	C	G	G	G	G	G
S1A_497902351	T/C	1A	497902351	+	NA	NA	NA	NA	NA	NA	T	Y	T	T	T	C	C	T	Y	C	C	T	T	Y	T	T	C	T	T	T	Y	T	T	Y	T	T	T	T	C	T	T	Y	C	C	T	T	T	T	T
S1A_497933410	G/A	1A	497933410	+	NA	NA	NA	NA	NA	NA	G	R	G	G	G	A	A	G	R	A	A	G	G	R	N	G	A	G	G	G	R	G	G	R	G	G	N	N	A	G	G	R	A	A	G	G	G	G	G
S1A_497933432	G/A	1A	497933432	+	NA	NA	NA	NA	NA	NA	G	R	G	G	G	A	A	G	R	A	A	G	G	R	N	G	A	G	G	G	R	G	G	R	G	G	N	N	A	G	G	R	A	A	G	G	G	G	G
S1A_497934398	A/G	1A	497934398	+	NA	NA	NA	NA	NA	NA	A	A	R	A	A	A	A	A	N	A	A	A	A	A	A	R	R	A	R	R	A	A	A	A	A	A	N	A	A	R	A	A	R	A	A	A	A	A	A
S1A_497934400	C/T	1A	497934400	+	NA	NA	NA	NA	NA	NA	C	C	Y	C	C	C	C	C	N	C	C	C	C	C	C	Y	Y	C	Y	Y	C	C	C	C	C	C	N	C	C	Y	C	C	Y	C	C	C	C	C	C
S1A_497934404	A/C	1A	497934404	+	NA	NA	NA	NA	NA	NA	A	A	M	A	A	A	A	A	N	A	A	A	A	A	A	M	M	A	M	M	A	A	A	A	A	A	N	A	A	M	A	A	M	A	A	A	A	A	A
S1A_498061612	T/C	1A	498061612	+	NA	NA	NA	NA	NA	NA	T	Y	Y	T	T	T	T	T	T	T	T	T	T	T	N	Y	T	T	Y	Y	T	T	N	T	T	T	C	T	T	T	T	T	N	T	T	T	N	T	Y
S1A_498061619	G/A	1A	498061619	+	NA	NA	NA	NA	NA	NA	G	R	R	G	G	G	G	G	G	G	G	G	G	G	N	R	G	G	R	R	G	G	N	G	G	G	A	G	G	G	G	G	N	G	G	G	N	G	R
S1A_498822958	A/G	1A	498822958	+	NA	NA	NA	NA	NA	NA	A	A	A	A	A	N	A	A	A	N	N	R	A	G	N	A	R	A	A	A	R	A	A	A	A	A	R	N	N	A	R	A	N	R	A	A	R	R	A
S1A_498822973	A/G	1A	498822973	+	NA	NA	NA	NA	NA	NA	A	A	A	A	A	N	A	A	A	N	N	R	A	G	N	A	R	A	A	A	R	A	A	A	A	A	R	N	N	A	R	A	N	R	A	A	R	R	A
S1A_499864157	T/C	1A	499864157	+	NA	NA	NA	NA	NA	NA	T	C	T	T	T	T	C	T	T	T	T	T	T	T	T	T	T	T	T	T	Y	C	T	T	T	C	T	T	T	T	T	Y	T	C	T	T	T	T	T
S1A_499864420	G/C	1A	499864420	+	NA	NA	NA	NA	NA	NA	S	S	G	G	G	G	C	G	G	G	G	G	G	G	S	G	G	G	G	N	S	C	G	G	G	C	G	G	G	G	G	S	G	C	G	G	G	G	S
S1A_499864432	C/G	1A	499864432	+	NA	NA	NA	NA	NA	NA	C	S	C	C	C	C	G	C	C	C	C	C	C	C	S	C	C	C	N	C	S	G	C	C	C	G	C	N	C	C	C	C	C	G	C	C	C	C	S
S1A_500074551	T/C	1A	500074551	+	NA	NA	NA	NA	NA	NA	T	Y	T	T	T	T	C	T	T	T	T	T	T	T	T	T	T	T	T	T	C	C	T	T	T	C	T	T	T	T	T	Y	T	C	T	T	T	T	T
S1A_500842256	G/C	1A	500842256	+	NA	NA	NA	NA	NA	NA	S	S	G	C	G	G	C	G	G	G	G	G	G	G	G	G	G	G	G	G	S	C	G	G	G	C	G	G	G	G	G	S	G	C	G	G	G	G	S
S1A_500961323	A/G	1A	500961323	+	NA	NA	NA	NA	NA	NA	A	A	A	A	A	R	A	A	A	A	R	A	A	R	A	A	A	A	A	A	A	A	A	A	A	A	A	A	R	A	A	A	R	A	A	A	A	A	A
S1A_500980841	T/C	1A	500980841	+	NA	NA	NA	NA	NA	NA	Y	Y	T	C	T	T	C	T	T	T	T	T	T	T	Y	T	T	T	T	T	T	C	T	T	T	C	N	T	T	T	T	C	T	C	T	T	T	T	Y
S1A_501031655	T/A	1A	501031655	+	NA	NA	NA	NA	NA	NA	A	T	T	T	A	A	T	A	T	T	A	T	T	W	N	T	T	A	T	T	T	T	T	A	T	T	T	T	A	T	T	T	A	T	W	T	T	T	W
S1A_501031661	C/A	1A	501031661	+	NA	NA	NA	NA	NA	NA	A	C	C	C	A	A	C	A	C	C	A	C	C	M	N	C	C	A	C	C	C	C	C	A	C	C	C	C	A	C	C	C	A	C	M	C	C	C	M
S1A_502497987	G/A	1A	502497987	+	NA	NA	NA	NA	NA	NA	G	G	R	R	R	R	G	G	R	R	G	R	G	G	G	G	G	G	G	R	G	R	G	G	R	G	R	G	G	R	G	G	G	G	G	G	G	R	G
S1A_502682678	G/A	1A	502682678	+	NA	NA	NA	NA	NA	NA	R	G	G	A	G	G	G	G	N	G	N	N	G	G	G	G	G	G	G	G	G	A	R	G	N	A	G	G	G	N	N	G	G	A	N	G	G	N	R
S1A_502682708	G/A	1A	502682708	+	NA	NA	NA	NA	NA	NA	G	A	G	G	G	G	A	G	N	A	N	N	G	G	G	G	A	G	G	G	A	G	G	G	N	G	G	G	G	N	N	R	G	G	N	G	G	N	G
S1A_504089999	T/C	1A	504089999	+	NA	NA	NA	NA	NA	NA	T	T	Y	T	T	T	T	T	Y	N	T	T	Y	Y	Y	Y	T	T	Y	C	T	T	Y	T	Y	T	Y	Y	T	T	Y	Y	T	N	T	Y	Y	Y	T
S1A_504090038	G/A	1A	504090038	+	NA	NA	NA	NA	NA	NA	R	G	G	G	R	R	G	R	G	G	R	G	G	G	G	G	G	R	G	G	G	R	G	R	G	G	G	G	R	G	G	G	R	G	R	G	G	G	R
S1A_504574172	A/G	1A	504574172	+	NA	NA	NA	NA	NA	NA	R	R	A	A	A	R	R	A	N	A	R	R	A	R	R	A	R	A	A	R	A	A	A	R	A	A	A	A	R	R	A	A	G	A	R	R	A	A	A
S1A_504574212	A/C	1A	504574212	+	NA	NA	NA	NA	NA	NA	M	M	A	A	A	M	M	A	N	A	M	M	A	M	M	A	M	A	A	M	A	A	A	M	A	A	A	A	M	M	A	A	C	A	M	M	A	A	A
S1A_504610880	C/T	1A	504610880	+	NA	NA	NA	NA	NA	NA	C	Y	C	T	C	T	T	C	Y	T	T	C	C	C	Y	C	T	C	C	C	T	C	Y	Y	C	T	C	C	T	C	C	Y	N	T	Y	C	C	C	T
S1A_504703030	A/C	1A	504703030	+	NA	NA	NA	NA	NA	NA	A	A	A	N	A	A	A	A	M	A	A	A	A	A	A	A	C	A	A	A	A	A	A	A	A	C	A	A	A	A	A	A	A	A	A	A	A	A	M
S1A_504977501	G/C	1A	504977501	+	NA	NA	NA	NA	NA	NA	S	G	G	C	G	G	G	G	G	G	G	G	G	G	G	G	C	G	G	G	G	G	G	G	G	C	G	N	G	G	G	G	G	G	G	G	G	G	S
S1A_505682479	T/C	1A	505682479	+	NA	NA	NA	NA	NA	NA	T	T	C	T	T	T	T	T	T	T	T	T	T	T	T	C	T	T	C	C	T	T	T	T	T	T	C	T	T	C	T	T	T	T	T	T	T	T	T
S1A_505880265	A/G	1A	505880265	+	NA	NA	NA	NA	NA	NA	G	R	A	A	A	A	A	A	A	A	A	A	A	A	R	A	A	A	A	A	A	N	A	A	A	G	A	G	A	A	G	R	A	A	R	G	G	A	A
S1A_506298207	C/T	1A	506298207	+	NA	NA	NA	NA	NA	NA	C	Y	C	T	C	Y	T	C	N	N	Y	C	C	Y	Y	C	Y	Y	Y	C	Y	Y	Y	C	Y	Y	C	C	Y	Y	C	Y	Y	T	Y	C	C	Y	Y
S1A_506671630	A/C	1A	506671630	+	NA	NA	NA	NA	NA	NA	M	M	A	C	A	C	C	M	A	A	C	A	A	A	A	A	C	M	A	A	C	C	M	M	A	C	A	A	C	A	A	C	C	C	A	A	A	A	M
S1A_507849257	C/T	1A	507849257	+	NA	NA	NA	NA	NA	NA	C	C	Y	C	Y	C	C	C	C	C	C	C	Y	C	C	C	C	C	Y	Y	T	N	Y	C	C	C	C	C	C	Y	Y	C	C	Y	C	Y	Y	C	C
S1A_507849268	G/A	1A	507849268	+	NA	NA	NA	NA	NA	NA	G	G	R	G	R	G	G	G	G	G	G	G	R	G	G	G	G	G	R	R	A	N	R	G	G	G	G	G	G	R	R	G	G	R	G	R	R	G	G
S1A_507978271	C/T	1A	507978271	+	NA	NA	NA	NA	NA	NA	C	T	N	T	C	T	T	N	C	C	T	C	C	T	C	C	T	C	C	C	T	C	C	T	N	T	C	C	T	C	C	T	T	T	C	C	C	C	Y
S1A_508184636	C/T	1A	508184636	+	NA	NA	NA	NA	NA	NA	C	C	C	C	C	C	C	C	Y	T	T	C	C	C	C	C	C	C	C	C	C	C	C	Y	C	C	C	C	T	C	C	C	T	C	Y	C	C	C	C
S1A_508571601	G/T	1A	508571601	+	NA	NA	NA	NA	NA	NA	G	G	G	T	G	G	G	G	G	G	G	G	G	G	K	G	G	G	G	G	G	G	G	G	G	G	G	G	G	G	G	G	G	G	G	G	G	G	G
S1A_508571657	A/G	1A	508571657	+	NA	NA	NA	NA	NA	NA	A	A	A	G	A	A	A	A	A	A	A	A	A	A	R	A	A	A	A	A	A	A	A	A	A	A	A	A	A	A	A	A	A	A	A	A	A	A	A
S1A_508723994	G/T	1A	508723994	+	NA	NA	NA	NA	NA	NA	G	K	G	G	G	T	T	G	N	T	T	G	G	T	G	G	N	G	G	G	T	T	G	K	G	G	G	G	T	G	N	K	T	N	N	G	G	G	G
S1A_509033664	C/A	1A	509033664	+	NA	NA	NA	NA	NA	NA	N	C	C	C	N	C	C	C	A	A	A	C	C	M	C	C	C	N	C	C	C	C	C	N	N	C	C	C	A	C	C	C	A	C	M	C	C	C	C
S1A_509676155	G/T	1A	509676155	+	NA	NA	NA	NA	NA	NA	G	G	G	G	G	G	G	G	T	T	T	G	G	K	G	G	G	G	G	G	G	G	G	K	N	G	G	G	T	G	G	G	T	G	K	G	G	G	G
S1A_509676171	G/T	1A	509676171	+	NA	NA	NA	NA	NA	NA	G	G	G	G	G	G	G	G	T	T	T	G	G	K	G	G	G	G	G	G	G	G	G	K	N	G	G	G	T	G	G	G	T	G	K	G	G	G	G
S1A_509676176	G/C	1A	509676176	+	NA	NA	NA	NA	NA	NA	G	G	G	G	G	G	G	G	C	C	C	G	G	S	G	G	G	G	G	G	G	G	G	S	N	G	G	G	C	G	G	G	C	G	S	G	G	G	G
S1A_509676197	C/T	1A	509676197	+	NA	NA	NA	NA	NA	NA	C	C	C	C	C	C	C	C	T	T	T	C	C	Y	C	C	C	C	C	C	C	C	C	Y	N	C	C	C	T	C	C	C	T	C	Y	C	C	C	C
S1A_509676242	G/A	1A	509676242	+	NA	NA	NA	NA	NA	NA	G	G	G	G	G	G	G	G	A	A	A	G	G	R	G	G	G	G	G	G	G	G	G	G	G	G	G	G	A	G	G	G	A	G	G	G	G	G	G
S1A_509772993	C/T	1A	509772993	+	NA	NA	NA	NA	NA	NA	Y	Y	C	T	N	T	T	C	C	C	C	C	C	C	C	C	T	C	C	C	T	T	C	N	C	C	C	C	N	C	N	Y	N	N	N	C	C	N	C
S1A_509773018	C/T	1A	509773018	+	NA	NA	NA	NA	NA	NA	Y	Y	C	T	N	T	T	C	C	C	C	C	C	C	C	C	T	C	C	C	T	T	C	N	C	C	C	C	N	C	N	Y	N	N	N	C	C	N	C
S1A_509773060	G/A	1A	509773060	+	NA	NA	NA	NA	NA	NA	G	R	G	R	N	G	A	G	G	G	G	G	G	N	G	G	G	G	G	G	G	N	G	G	G	G	G	G	G	G	N	N	G	N	G	G	G	G	G
S1A_509773089	C/T	1A	509773089	+	NA	NA	NA	NA	NA	NA	C	C	C	C	N	C	C	C	T	T	T	C	C	N	C	C	C	C	C	C	C	N	C	C	C	C	C	C	T	C	N	N	T	N	C	C	C	C	C
S1A_510281396	A/G	1A	510281396	+	NA	NA	NA	NA	NA	NA	A	R	A	G	A	G	G	A	N	A	A	A	A	A	A	A	G	A	A	A	G	G	R	A	A	A	N	A	A	A	A	R	A	G	A	A	A	A	A
S1A_510849238	A/G	1A	510849238	+	NA	NA	NA	NA	NA	NA	A	A	A	G	A	G	G	R	G	G	G	A	A	R	R	A	G	A	A	N	G	G	R	R	A	A	A	A	G	A	A	R	G	G	A	A	A	A	A
S1A_510849322	T/C	1A	510849322	+	NA	NA	NA	NA	NA	NA	T	T	T	T	T	T	T	T	N	C	C	T	T	Y	T	T	T	T	T	T	T	T	T	T	T	T	T	T	C	T	T	T	C	T	N	T	T	T	T
S1A_510983454	A/G	1A	510983454	+	NA	NA	NA	NA	NA	NA	A	R	A	G	A	G	G	A	N	N	A	A	A	A	N	A	N	A	A	A	G	N	A	A	A	N	A	A	N	A	A	A	N	G	A	A	A	A	A
S1A_511410447	G/C	1A	511410447	+	NA	NA	NA	NA	NA	NA	S	S	G	G	G	G	S	G	G	G	S	S	G	S	S	G	S	G	G	G	G	G	G	S	G	G	G	G	S	G	G	G	S	S	S	S	G	G	G
S1A_511410464	G/C	1A	511410464	+	NA	NA	NA	NA	NA	NA	S	S	G	G	G	G	S	G	G	G	S	S	G	S	S	G	S	G	G	G	G	G	G	S	G	G	G	G	S	G	G	G	S	S	S	S	G	G	G
S1A_511502247	C/G	1A	511502247	+	NA	NA	NA	NA	NA	NA	S	S	C	C	C	C	S	C	C	C	S	S	C	S	S	C	S	C	C	S	C	C	C	S	C	C	C	C	S	S	C	C	C	S	S	S	C	C	C
S1A_511609387	C/G	1A	511609387	+	NA	NA	NA	NA	NA	NA	S	C	C	C	G	N	C	S	N	N	C	N	C	C	S	C	C	S	C	S	S	G	C	N	C	C	C	C	C	S	C	C	N	C	C	C	C	N	C
S1A_511609396	C/T	1A	511609396	+	NA	NA	NA	NA	NA	NA	C	C	C	T	C	N	C	C	N	N	T	N	C	C	Y	C	C	C	C	C	C	C	C	N	C	C	C	C	T	C	C	C	N	C	C	C	C	N	C
S1A_511609399	C/T	1A	511609399	+	NA	NA	NA	NA	NA	NA	Y	C	C	T	T	N	C	Y	N	N	T	N	C	C	T	C	C	Y	C	Y	Y	T	C	N	C	C	C	C	T	Y	C	C	N	C	C	C	C	N	C
S1A_511609405	C/G	1A	511609405	+	NA	NA	NA	NA	NA	NA	S	C	C	C	G	N	C	S	N	N	C	N	C	C	S	C	C	S	C	S	S	G	C	N	C	C	C	C	C	S	C	C	N	C	C	C	C	N	C
S1A_511609406	G/C	1A	511609406	+	NA	NA	NA	NA	NA	NA	G	G	G	C	G	N	G	G	N	N	C	N	G	G	S	G	G	G	G	G	G	G	G	N	G	G	G	G	C	G	G	G	N	G	G	G	G	N	G
S1A_511614678	T/C	1A	511614678	+	NA	NA	NA	NA	NA	NA	T	Y	Y	Y	Y	Y	Y	T	Y	T	T	Y	T	T	T	Y	T	T	Y	Y	Y	T	T	T	Y	T	Y	Y	T	Y	Y	Y	T	T	Y	Y	Y	T	T
S1A_511614700	T/C	1A	511614700	+	NA	NA	NA	NA	NA	NA	T	Y	Y	Y	Y	Y	Y	T	Y	T	T	Y	T	T	T	Y	T	T	Y	Y	Y	T	T	T	Y	T	Y	Y	T	Y	Y	Y	T	T	Y	Y	Y	T	T
S1A_511633074	T/C	1A	511633074	+	NA	NA	NA	NA	NA	NA	T	T	T	C	N	C	T	T	C	C	C	T	T	Y	T	T	T	T	T	T	T	T	Y	Y	T	T	T	T	C	T	T	T	C	T	Y	T	T	T	T
S1A_512475885	C/T	1A	512475885	+	NA	NA	NA	NA	NA	NA	Y	Y	C	C	N	C	T	T	C	C	C	C	C	C	N	C	N	C	C	C	T	T	Y	C	C	C	C	C	C	C	C	Y	C	T	C	C	C	C	C
S1A_512496668	G/A	1A	512496668	+	NA	NA	NA	NA	NA	NA	R	R	G	G	G	G	A	R	G	G	G	G	G	G	G	G	G	G	G	G	A	A	G	G	G	G	G	G	G	G	G	R	G	A	G	G	G	G	G
S1A_512866827	G/C	1A	512866827	+	NA	NA	NA	NA	NA	NA	S	G	S	G	G	G	G	S	G	G	S	G	G	G	G	S	G	S	S	S	G	N	G	S	G	S	S	G	S	S	G	G	G	G	G	G	G	G	S
S1A_512866859	T/C	1A	512866859	+	NA	NA	NA	NA	NA	NA	Y	T	Y	T	T	T	T	Y	T	T	Y	T	T	T	T	Y	T	Y	Y	Y	T	N	T	Y	T	Y	Y	T	Y	Y	T	T	T	T	T	T	T	T	Y
S1A_512885554	A/C	1A	512885554	+	NA	NA	NA	NA	NA	NA	A	A	A	C	A	C	A	A	M	C	C	A	A	M	N	A	A	A	A	A	A	A	M	C	A	A	N	A	C	A	A	A	C	A	A	A	A	A	A
S1A_513503126	C/G	1A	513503126	+	NA	NA	NA	NA	NA	NA	N	C	C	G	C	G	C	C	N	G	G	C	N	C	C	C	C	C	C	C	C	C	C	S	C	C	C	C	G	C	C	C	G	C	C	C	C	C	C
S1A_513653689	C/G	1A	513653689	+	NA	NA	NA	NA	NA	NA	S	S	S	S	S	S	S	C	S	S	S	S	S	S	G	C	S	S	C	C	C	S	C	S	C	C	S	S	S	C	S	S	S	S	S	S	C	S	C
S1A_513660886	C/T	1A	513660886	+	NA	NA	NA	NA	NA	NA	C	Y	C	C	C	C	T	C	C	C	C	C	C	C	C	C	C	C	C	C	T	T	C	C	C	C	C	C	C	C	C	Y	C	T	C	C	C	C	C
S1A_513744799	A/G	1A	513744799	+	NA	NA	NA	NA	NA	NA	R	G	A	A	A	A	N	A	G	A	N	A	R	A	N	A	R	N	A	A	R	R	A	A	R	A	A	N	R	A	A	R	A	N	R	G	G	A	N
S1A_514098669	G/A	1A	514098669	+	NA	NA	NA	NA	NA	NA	G	G	G	R	G	G	G	G	R	R	G	G	G	G	R	G	R	G	G	G	R	G	G	G	G	G	G	G	G	G	G	G	G	R	G	G	G	G	G
S1A_514098678	A/C	1A	514098678	+	NA	NA	NA	NA	NA	NA	A	A	A	M	A	A	A	A	M	M	A	A	A	A	M	A	M	A	A	A	M	A	A	A	A	A	A	A	A	A	A	A	A	M	A	A	A	A	A
S1A_514115849	C/T	1A	514115849	+	NA	NA	NA	NA	NA	NA	Y	Y	C	C	C	N	T	T	C	N	N	C	C	C	C	C	N	C	C	C	T	T	C	C	C	C	C	C	N	C	C	Y	N	T	C	C	C	C	C
S1A_514115890	C/G	1A	514115890	+	NA	NA	NA	NA	NA	NA	S	S	C	C	C	N	G	G	C	N	N	C	C	C	C	C	N	C	C	C	G	G	C	C	C	C	C	C	N	C	C	S	N	G	C	C	C	C	C
S1A_514203053	C/T	1A	514203053	+	NA	NA	NA	NA	NA	NA	Y	Y	Y	Y	Y	C	C	Y	T	T	T	Y	C	Y	Y	Y	Y	Y	Y	Y	C	Y	Y	Y	Y	Y	Y	Y	T	Y	Y	C	T	C	Y	C	C	Y	Y
S1A_514203060	G/A	1A	514203060	+	NA	NA	NA	NA	NA	NA	R	R	R	R	R	G	R	R	G	G	G	R	A	R	R	R	G	R	R	R	A	R	R	R	R	R	R	R	G	R	R	A	G	R	R	A	A	R	R
S1A_514257341	C/A	1A	514257341	+	NA	NA	NA	NA	NA	NA	N	M	C	C	C	N	A	N	C	C	C	C	C	C	C	C	C	C	C	C	A	A	C	C	C	C	C	C	C	C	C	M	C	A	C	C	C	C	C
S1A_514257362	C/T	1A	514257362	+	NA	NA	NA	NA	NA	NA	N	C	C	C	C	N	C	N	T	T	T	C	C	Y	C	C	T	C	C	C	C	C	C	Y	C	C	C	C	T	C	C	C	T	C	Y	C	C	C	C
S1A_515899480	A/C	1A	515899480	+	NA	NA	NA	NA	NA	NA	M	A	A	A	A	A	A	A	A	A	C	A	A	C	A	A	C	A	A	A	A	A	A	M	A	C	A	A	C	A	A	A	C	A	M	A	A	A	A
S1A_516079891	G/C	1A	516079891	+	NA	NA	NA	NA	NA	NA	S	G	G	G	G	G	G	N	N	G	C	G	G	G	G	N	N	G	G	G	G	G	G	S	G	C	G	G	C	G	G	G	C	G	G	G	G	G	G
S1A_516581337	T/C	1A	516581337	+	NA	NA	NA	NA	NA	NA	T	T	T	T	N	C	T	T	T	N	C	T	T	Y	T	T	T	T	T	T	T	T	T	T	T	T	T	T	C	Y	T	N	C	T	T	T	T	N	T
S1A_516644860	C/T	1A	516644860	+	NA	NA	NA	NA	NA	NA	C	C	C	C	C	C	N	C	C	C	C	C	C	C	Y	C	T	N	C	C	C	C	C	C	C	C	C	C	C	C	C	C	N	C	C	C	C	C	C
S1A_516644877	A/T	1A	516644877	+	NA	NA	NA	NA	NA	NA	W	A	A	A	A	A	N	T	A	T	A	A	A	A	A	A	A	N	A	A	T	T	A	A	A	T	A	A	A	A	A	A	N	A	A	A	A	A	W
S1A_516726847	G/A	1A	516726847	+	NA	NA	NA	NA	NA	NA	G	G	G	G	G	G	G	A	N	N	G	G	G	G	G	G	G	G	G	G	G	G	A	G	G	A	G	G	G	G	G	G	G	G	G	G	G	G	G
S1A_516726889	A/G	1A	516726889	+	NA	NA	NA	NA	NA	NA	A	A	A	A	A	A	A	G	N	N	A	A	A	A	A	A	A	A	A	A	A	A	G	A	A	G	A	A	A	A	A	A	A	A	A	A	A	A	A
S1A_516732460	G/A	1A	516732460	+	NA	NA	NA	NA	NA	NA	R	G	G	G	G	G	G	R	R	A	G	G	G	G	G	G	G	G	G	G	R	G	G	G	G	G	G	G	G	G	G	G	G	G	G	G	G	G	G
S1A_516732683	C/A	1A	516732683	+	NA	NA	NA	NA	NA	NA	C	C	C	C	C	N	C	A	A	N	C	C	C	N	C	C	C	C	C	C	N	C	C	C	N	C	N	C	C	C	C	C	N	C	N	C	C	N	C
S1A_516739914	G/C	1A	516739914	+	NA	NA	NA	NA	NA	NA	G	C	S	S	S	C	S	G	S	G	C	S	S	S	G	S	C	G	G	S	S	S	S	N	G	G	G	G	G	S	S	S	N	S	C	S	S	G	S
S1A_516739920	C/T	1A	516739920	+	NA	NA	NA	NA	NA	NA	C	T	Y	Y	Y	T	Y	C	Y	C	T	Y	Y	Y	C	Y	T	C	C	Y	Y	Y	Y	N	C	C	C	C	C	Y	Y	Y	N	Y	T	Y	Y	C	Y
S1A_518693802	C/G	1A	518693802	+	NA	NA	NA	NA	NA	NA	N	C	C	C	C	C	C	N	C	C	N	C	C	C	C	S	C	N	S	S	C	N	C	C	C	N	S	C	C	C	C	C	N	C	C	C	C	C	C
S1A_519799657	C/T	1A	519799657	+	NA	NA	NA	NA	NA	NA	C	C	C	C	C	C	C	T	C	C	C	C	C	C	C	C	C	C	C	C	C	C	C	C	C	C	C	C	C	C	C	C	C	T	C	C	C	C	C
S1A_520009488	G/T	1A	520009488	+	NA	NA	NA	NA	NA	NA	G	K	G	G	G	G	K	G	G	N	N	K	G	G	N	G	G	G	G	G	G	G	G	T	G	G	G	N	T	G	G	G	T	K	T	T	N	G	G
S1A_520009498	A/G	1A	520009498	+	NA	NA	NA	NA	NA	NA	A	R	A	A	A	A	R	A	A	N	N	R	A	A	N	A	A	A	A	A	A	A	A	G	A	A	A	N	G	A	A	A	G	R	G	G	N	A	A
S1A_520009507	G/A	1A	520009507	+	NA	NA	NA	NA	NA	NA	G	R	G	G	G	G	R	G	G	N	N	R	G	G	N	G	G	G	G	G	G	G	G	A	G	G	G	N	A	G	G	G	A	R	A	A	N	G	G
S1A_520009534	C/T	1A	520009534	+	NA	NA	NA	NA	NA	NA	C	Y	C	C	C	C	Y	C	C	N	N	Y	C	C	N	C	C	C	C	C	C	C	C	T	C	C	C	N	T	C	C	C	T	Y	T	T	N	C	C
S1A_520350920	G/A	1A	520350920	+	NA	NA	NA	NA	NA	NA	R	G	G	G	G	G	G	A	G	A	A	G	G	R	A	G	G	G	G	G	R	A	G	G	G	G	G	A	A	G	R	R	A	G	R	A	A	G	G
S1A_520354078	C/G	1A	520354078	+	NA	NA	NA	NA	NA	NA	S	C	G	G	G	G	C	C	N	C	C	G	G	N	N	G	G	G	G	G	C	C	N	S	N	G	N	N	C	G	C	C	C	N	G	C	C	G	G
S1A_520421341	C/T	1A	520421341	+	NA	NA	NA	NA	NA	NA	C	Y	C	C	C	C	Y	C	C	C	C	C	C	C	C	C	C	C	C	C	C	C	C	Y	C	C	C	C	Y	C	C	C	Y	Y	C	Y	C	C	C
S1A_520421367	C/T	1A	520421367	+	NA	NA	NA	NA	NA	NA	C	C	C	Y	C	C	C	C	C	Y	C	C	C	C	C	C	C	C	C	C	C	C	C	C	Y	C	C	C	C	C	C	C	C	C	C	C	C	Y	C
S1A_520573048	T/C	1A	520573048	+	NA	NA	NA	NA	NA	NA	T	C	T	Y	T	C	C	T	T	T	T	T	T	T	T	T	C	T	T	N	Y	T	T	T	T	C	N	T	T	T	C	Y	T	C	T	T	T	T	Y
S1A_520939489	T/G	1A	520939489	+	NA	NA	NA	NA	NA	NA	T	N	T	T	T	T	N	T	N	T	K	T	N	K	G	T	T	K	T	N	T	T	T	T	T	T	T	N	N	T	T	T	T	N	T	T	N	T	N
S1A_520939514	G/T	1A	520939514	+	NA	NA	NA	NA	NA	NA	G	N	G	G	G	G	N	G	N	G	K	G	N	K	T	G	G	K	G	N	G	G	G	G	G	G	G	N	N	G	G	G	G	N	G	G	N	G	N
S1A_521257426	G/C	1A	521257426	+	NA	NA	NA	NA	NA	NA	G	S	G	G	G	G	S	G	G	G	G	S	G	G	S	G	G	G	G	G	G	G	G	G	G	G	G	G	S	G	G	G	G	S	S	S	G	G	G
S1A_521259508	G/C	1A	521259508	+	NA	NA	NA	NA	NA	NA	G	C	S	S	G	G	S	G	G	S	G	S	G	G	C	S	G	S	S	S	G	G	G	S	S	G	G	G	S	S	G	G	S	S	S	C	G	G	G
S1A_521933660	C/G	1A	521933660	+	NA	NA	NA	NA	NA	NA	C	C	C	C	C	C	C	C	C	C	C	C	C	C	G	C	G	C	C	C	S	C	C	C	C	C	C	G	C	C	S	S	C	C	S	G	G	C	C
S1A_521933683	C/T	1A	521933683	+	NA	NA	NA	NA	NA	NA	C	C	C	C	C	C	C	C	C	C	C	C	C	C	T	C	T	C	C	C	Y	C	C	C	C	C	C	T	C	C	Y	Y	C	C	Y	T	T	C	C
S1A_521933721	T/C	1A	521933721	+	NA	NA	NA	NA	NA	NA	T	T	T	T	T	T	T	T	T	T	T	T	T	T	C	T	C	T	T	T	C	T	T	T	T	T	N	C	T	T	Y	Y	T	T	T	C	C	T	T
S1A_521977891	T/C	1A	521977891	+	NA	NA	NA	NA	NA	NA	T	T	T	T	T	T	T	T	T	T	T	T	T	T	C	T	C	T	T	T	Y	T	T	T	T	T	T	C	T	T	Y	Y	T	T	T	C	C	T	T
S1A_521977982	C/T	1A	521977982	+	NA	NA	NA	NA	NA	NA	Y	Y	Y	Y	C	C	Y	T	T	Y	Y	Y	Y	Y	C	Y	C	Y	Y	Y	C	Y	T	Y	Y	Y	Y	N	Y	Y	Y	C	Y	Y	Y	C	C	Y	Y
S1A_521978927	C/T	1A	521978927	+	NA	NA	NA	NA	NA	NA	Y	C	C	C	C	C	C	Y	Y	Y	Y	C	C	C	C	C	C	C	C	C	C	Y	C	Y	C	C	C	C	Y	C	C	C	Y	C	C	C	C	C	C
S1A_521991095	A/G	1A	521991095	+	NA	NA	NA	NA	NA	NA	A	A	A	A	A	N	A	A	A	A	A	A	A	A	N	N	G	A	A	A	R	N	A	A	A	A	N	G	A	A	R	G	A	N	N	G	G	A	A
S1A_522189599	G/A	1A	522189599	+	NA	NA	NA	NA	NA	NA	G	G	G	G	G	G	G	G	G	G	G	G	G	G	R	G	G	G	G	G	G	G	G	G	G	G	G	A	G	G	R	A	G	G	R	A	A	G	G
S1A_522436718	C/T	1A	522436718	+	NA	NA	NA	NA	NA	NA	T	T	C	C	Y	T	T	Y	N	C	Y	N	Y	N	C	Y	N	C	C	N	Y	Y	C	Y	C	N	C	N	Y	Y	T	C	C	C	Y	C	C	Y	C
S1A_524389483	G/A	1A	524389483	+	NA	NA	NA	NA	NA	NA	G	G	G	G	G	G	G	G	G	G	G	G	G	G	R	G	G	G	G	G	G	G	G	G	G	G	G	A	G	G	R	N	G	G	G	A	A	G	G
S1A_525021260	C/T	1A	525021260	+	NA	NA	NA	NA	NA	NA	C	C	C	C	Y	C	C	C	C	N	Y	N	Y	C	T	C	T	C	N	C	Y	Y	Y	Y	C	C	C	T	C	C	C	Y	C	C	C	T	T	T	C
S1A_526620999	G/A	1A	526620999	+	NA	NA	NA	NA	NA	NA	R	G	G	R	R	R	G	R	G	G	G	R	R	G	G	G	G	R	G	G	R	R	G	G	R	R	G	G	G	G	G	R	G	G	R	G	R	N	G
S1A_526621001	A/G	1A	526621001	+	NA	NA	NA	NA	NA	NA	R	A	A	R	R	R	A	R	A	A	A	R	R	A	A	A	A	R	A	A	R	R	A	A	R	R	A	A	A	A	A	R	A	A	R	A	R	N	A
S1A_527097859	A/G	1A	527097859	+	NA	NA	NA	NA	NA	NA	A	A	A	A	A	A	A	A	A	A	A	A	A	A	G	A	A	A	N	A	A	A	A	A	A	A	A	N	A	A	R	R	A	A	A	G	G	A	A
S1A_527200538	T/G	1A	527200538	+	NA	NA	NA	NA	NA	NA	T	T	T	T	T	T	T	T	T	T	T	T	T	T	G	T	T	T	T	T	T	T	N	T	T	T	T	G	T	T	T	K	T	T	K	G	N	T	T
S1A_527200586	C/T	1A	527200586	+	NA	NA	NA	NA	NA	NA	C	C	C	C	C	C	C	C	C	C	C	C	C	C	T	C	C	C	C	C	C	C	N	C	C	C	C	T	C	C	C	Y	C	C	Y	T	N	C	C
S1A_529326562	C/T	1A	529326562	+	NA	NA	NA	NA	NA	NA	C	C	C	C	N	C	C	C	C	C	C	C	C	C	T	C	T	T	C	C	N	C	C	Y	N	C	C	T	C	C	C	Y	C	C	T	T	T	C	Y
S1A_530178155	C/T	1A	530178155	+	NA	NA	NA	NA	NA	NA	C	C	C	C	C	C	C	C	C	C	T	C	C	C	C	C	T	C	C	N	T	C	C	C	C	C	C	C	T	C	C	C	T	C	C	C	C	C	C
S1A_530259034	G/C	1A	530259034	+	NA	NA	NA	NA	NA	NA	G	S	G	G	G	G	S	G	G	G	G	S	G	G	S	G	G	G	G	G	G	G	G	S	G	G	G	G	S	G	G	G	S	S	G	S	G	G	G
S1A_531015728	C/A	1A	531015728	+	NA	NA	NA	NA	NA	NA	C	C	C	A	C	C	N	C	A	A	C	C	N	C	A	C	C	C	C	C	C	A	C	C	C	C	C	A	C	C	C	A	C	N	C	A	A	C	C
S1A_531281699	G/A	1A	531281699	+	NA	NA	NA	NA	NA	NA	G	G	G	G	G	G	G	G	G	G	N	G	G	G	R	G	A	G	G	N	R	G	G	R	G	G	G	N	A	G	G	G	A	G	R	G	G	G	G
S1A_531326863	G/C	1A	531326863	+	NA	NA	NA	NA	NA	NA	G	G	G	S	G	S	G	G	N	G	G	G	G	G	G	G	G	G	C	S	G	G	G	S	G	G	N	C	G	G	G	G	G	G	G	G	G	C	S
S1A_531326902	A/G	1A	531326902	+	NA	NA	NA	NA	NA	NA	A	A	A	R	A	R	A	A	N	A	A	A	A	A	A	A	A	A	G	R	A	A	A	R	A	A	N	G	A	A	A	A	A	A	A	A	A	G	R
S1A_531561588	G/A	1A	531561588	+	NA	NA	NA	NA	NA	NA	G	A	G	A	G	G	N	R	A	A	G	G	G	G	A	G	G	G	G	G	G	A	G	G	G	G	G	A	G	G	A	A	G	A	G	A	A	R	G
S1A_531562725	C/T	1A	531562725	+	NA	NA	NA	NA	NA	NA	C	T	C	Y	Y	C	T	Y	Y	T	C	C	C	C	T	C	C	C	C	C	Y	T	C	C	C	C	C	T	C	C	T	T	C	T	C	T	T	C	C
S1A_531610822	T/G	1A	531610822	+	NA	NA	NA	NA	NA	NA	K	K	K	K	T	K	K	K	K	K	K	K	K	K	T	K	K	K	K	K	K	K	K	G	K	K	K	K	K	K	T	K	K	K	K	K	K	K	K
S1A_531875287	G/A	1A	531875287	+	NA	NA	NA	NA	NA	NA	G	G	G	A	G	G	G	A	A	A	G	G	N	G	G	G	G	G	G	G	G	A	N	N	G	G	G	N	G	G	G	G	N	G	G	G	G	N	G
S1A_531875303	T/C	1A	531875303	+	NA	NA	NA	NA	NA	NA	T	T	T	T	T	T	T	T	T	T	T	C	N	T	T	T	T	T	T	T	T	T	N	N	T	T	T	N	T	T	T	T	N	T	T	T	T	N	T
S1A_531875316	A/G	1A	531875316	+	NA	NA	NA	NA	NA	NA	R	G	A	A	A	A	G	A	A	A	A	A	N	R	R	A	G	A	A	A	G	A	N	N	G	G	A	N	A	A	R	R	N	G	A	A	A	N	R
S1A_531875317	G/A	1A	531875317	+	NA	NA	NA	NA	NA	NA	G	G	G	G	G	G	G	G	G	G	G	A	N	G	G	G	G	G	G	G	G	G	N	N	G	G	G	N	G	G	G	G	N	G	G	G	G	N	G
S1A_531875332	A/G	1A	531875332	+	NA	NA	NA	NA	NA	NA	R	G	A	A	A	A	G	A	A	A	A	A	N	R	R	A	G	A	A	A	G	A	N	N	G	G	A	N	A	A	R	R	N	G	A	A	A	N	R
S1A_531878244	G/T	1A	531878244	+	NA	NA	NA	NA	NA	NA	G	G	G	G	G	G	G	G	K	G	G	T	T	G	G	G	G	G	G	G	G	G	T	G	T	G	G	G	G	G	G	N	G	G	G	G	G	T	G
S1A_531993132	G/C	1A	531993132	+	NA	NA	NA	NA	NA	NA	G	G	G	G	G	G	G	G	C	G	G	C	C	G	G	G	G	G	G	N	N	G	C	G	S	G	N	N	G	G	G	G	G	G	G	G	G	C	G
S1A_531993159	C/A	1A	531993159	+	NA	NA	NA	NA	NA	NA	C	C	C	C	C	C	C	C	A	C	C	A	A	C	C	C	C	C	C	N	N	C	A	C	M	C	N	N	C	C	C	C	C	C	C	C	C	A	C
S1A_532246897	T/G	1A	532246897	+	NA	NA	NA	NA	NA	NA	K	T	T	K	T	G	N	K	G	G	G	G	G	K	T	T	N	T	T	T	T	G	G	K	T	T	T	N	G	K	T	T	G	N	T	T	T	G	T
S1A_532263105	T/C	1A	532263105	+	NA	NA	NA	NA	NA	NA	T	T	T	T	T	T	T	T	T	T	T	N	N	T	Y	T	C	T	T	T	T	T	N	T	T	T	T	T	T	T	T	T	T	T	T	T	T	N	T
S1A_532436687	G/C	1A	532436687	+	NA	NA	NA	NA	NA	NA	G	G	G	G	G	G	G	G	N	G	G	C	C	G	G	G	G	G	G	G	G	G	C	G	S	G	N	G	G	G	G	G	G	G	G	G	G	C	G
S1A_532477441	T/C	1A	532477441	+	NA	NA	NA	NA	NA	NA	N	T	T	T	T	T	T	T	Y	T	T	C	C	T	T	T	T	T	T	T	T	T	C	N	N	T	T	T	T	T	T	T	T	T	T	T	T	C	T
S1A_532483295	T/C	1A	532483295	+	NA	NA	NA	NA	NA	NA	N	T	T	T	T	T	T	T	Y	T	T	C	C	T	N	T	T	T	T	T	N	T	C	T	C	T	N	T	T	T	T	T	T	T	T	T	T	C	N
S1A_532483298	G/A	1A	532483298	+	NA	NA	NA	NA	NA	NA	N	G	G	G	G	G	G	G	R	G	G	A	A	G	N	G	G	G	G	G	N	G	A	G	A	G	N	G	G	G	G	G	G	G	G	G	G	A	N
S1A_532483320	T/C	1A	532483320	+	NA	NA	NA	NA	NA	NA	N	T	T	T	T	T	T	T	Y	T	T	C	C	T	N	T	T	T	T	T	N	T	C	T	C	T	N	T	T	T	T	T	T	T	T	T	T	C	N
S1A_532487814	T/C	1A	532487814	+	NA	NA	NA	NA	NA	NA	T	C	T	T	T	T	C	T	T	T	T	T	T	T	Y	T	T	T	T	T	C	T	T	T	T	T	T	T	T	N	C	Y	T	C	T	T	T	T	T
S1A_532529494	T/C	1A	532529494	+	NA	NA	NA	NA	NA	NA	C	T	T	C	T	C	T	C	C	C	C	N	N	C	T	T	C	Y	T	T	N	Y	N	Y	C	C	T	T	C	T	T	T	C	T	T	T	T	N	Y
S1A_532644655	C/T	1A	532644655	+	NA	NA	NA	NA	NA	NA	T	C	C	C	C	T	C	Y	C	C	C	N	N	Y	N	C	T	Y	N	C	C	C	N	C	T	T	C	C	C	N	C	C	C	C	C	C	C	N	Y
S1A_532670328	A/T	1A	532670328	+	NA	NA	NA	NA	NA	NA	A	A	A	A	A	A	A	A	A	A	A	T	N	N	A	A	A	A	A	A	A	A	T	A	T	A	A	A	A	A	A	A	A	A	A	A	A	T	A
S1A_532716685	G/A	1A	532716685	+	NA	NA	NA	NA	NA	NA	G	G	G	R	R	G	G	R	G	G	G	G	G	G	N	R	G	G	R	R	G	R	G	R	G	R	R	N	N	R	G	R	R	N	R	G	N	G	G
S1A_532716686	C/T	1A	532716686	+	NA	NA	NA	NA	NA	NA	C	Y	C	C	C	C	C	C	C	C	C	C	Y	C	N	Y	Y	C	C	Y	C	C	C	C	C	C	C	N	N	Y	C	C	C	N	C	Y	N	C	C
S1A_532716687	G/T	1A	532716687	+	NA	NA	NA	NA	NA	NA	K	K	G	G	K	K	G	G	G	G	G	T	G	G	N	G	G	G	K	G	T	G	G	G	G	G	G	N	N	K	G	G	G	N	G	G	N	T	G
S1A_532716688	C/A	1A	532716688	+	NA	NA	NA	NA	NA	NA	C	C	C	C	C	C	C	C	C	C	C	C	M	C	N	M	C	C	C	C	C	C	C	C	C	C	M	N	N	C	C	C	C	N	C	M	N	C	C
S1A_532716697	A/C	1A	532716697	+	NA	NA	NA	NA	NA	NA	C	M	A	M	M	M	A	M	M	M	M	C	C	C	N	M	M	C	M	M	C	A	C	M	A	M	M	N	N	M	A	A	M	N	M	M	N	C	A
S1A_532716718	C/A	1A	532716718	+	NA	NA	NA	NA	NA	NA	C	M	C	C	C	C	C	C	C	C	C	C	A	C	N	M	M	C	C	M	C	C	C	C	C	C	M	N	N	M	C	C	C	N	C	M	N	C	C
S1A_532716719	G/A	1A	532716719	+	NA	NA	NA	NA	NA	NA	G	R	A	R	G	R	A	G	R	R	R	G	G	G	N	G	R	G	R	G	G	R	G	G	A	G	R	N	N	R	A	R	G	N	R	G	N	G	A
S1A_532739074	T/C	1A	532739074	+	NA	NA	NA	NA	NA	NA	Y	Y	Y	Y	Y	T	Y	Y	Y	T	Y	N	N	Y	Y	Y	Y	Y	Y	Y	Y	Y	N	Y	Y	T	Y	Y	Y	Y	Y	Y	Y	Y	Y	Y	Y	N	T
S1A_532739075	A/T	1A	532739075	+	NA	NA	NA	NA	NA	NA	W	W	W	W	W	A	W	W	W	A	W	N	N	W	W	W	W	W	W	W	W	W	N	W	W	A	W	W	W	W	W	W	W	W	W	W	W	N	A
S1A_532757261	G/A	1A	532757261	+	NA	NA	NA	NA	NA	NA	R	R	G	G	R	G	R	R	G	G	R	G	R	R	R	R	R	G	G	R	R	R	G	R	G	G	R	N	G	R	G	G	R	A	R	R	G	G	G
S1A_532766637	C/A	1A	532766637	+	NA	NA	NA	NA	NA	NA	M	N	C	N	M	C	M	M	C	N	A	N	M	A	N	M	C	C	C	M	M	M	C	M	C	C	A	N	M	C	C	C	M	C	A	M	N	C	C
S1A_532766675	T/G	1A	532766675	+	NA	NA	NA	NA	NA	NA	K	N	K	N	K	T	K	K	T	N	G	N	K	G	N	K	T	T	K	G	K	K	T	K	T	T	G	N	K	G	T	T	K	T	G	K	N	T	T
S1A_532766683	C/G	1A	532766683	+	NA	NA	NA	NA	NA	NA	C	N	C	N	C	C	C	C	C	N	G	N	C	C	N	S	C	C	C	C	C	S	C	C	C	C	G	N	C	C	C	C	C	C	C	C	N	C	C
S1A_532773124	C/T	1A	532773124	+	NA	NA	NA	NA	NA	NA	C	C	Y	C	C	C	C	C	C	C	C	C	C	C	C	Y	C	C	Y	Y	C	C	C	C	C	C	Y	C	C	Y	C	C	C	C	C	C	C	C	C
S1A_532773129	C/T	1A	532773129	+	NA	NA	NA	NA	NA	NA	C	C	Y	C	C	C	C	C	C	C	C	C	C	C	C	Y	C	C	Y	Y	C	C	C	C	C	C	Y	C	C	Y	C	C	C	C	C	C	C	C	C
S1A_532773132	T/C	1A	532773132	+	NA	NA	NA	NA	NA	NA	T	T	Y	T	T	T	T	T	T	T	T	T	T	T	T	Y	T	T	Y	Y	T	T	T	T	T	T	Y	T	T	Y	T	T	T	T	T	T	T	T	T
S1A_532773144	G/T	1A	532773144	+	NA	NA	NA	NA	NA	NA	K	K	K	G	K	G	K	K	G	G	K	T	T	K	K	K	K	K	K	K	K	K	T	K	K	G	K	G	K	K	G	G	K	K	K	T	K	T	G
S1A_532773148	G/A	1A	532773148	+	NA	NA	NA	NA	NA	NA	G	G	G	G	G	G	G	G	G	G	G	R	R	G	G	G	G	G	G	G	G	G	A	G	R	G	G	G	G	G	G	G	G	G	G	G	G	A	G
S1A_532773195	A/C	1A	532773195	+	NA	NA	NA	NA	NA	NA	A	A	M	A	A	A	A	A	A	A	A	A	A	A	A	M	A	A	M	M	A	A	A	A	A	A	M	A	A	M	A	A	A	A	A	A	A	A	A
S1A_532773196	G/A	1A	532773196	+	NA	NA	NA	NA	NA	NA	R	R	G	G	R	G	R	R	G	G	R	R	R	R	R	R	R	R	G	G	R	R	G	R	G	G	R	G	R	R	G	G	R	R	R	R	R	G	G
S1A_532773248	T/C	1A	532773248	+	NA	NA	NA	NA	NA	NA	Y	Y	T	T	Y	T	Y	Y	T	T	Y	C	C	Y	Y	Y	Y	Y	T	T	Y	Y	N	Y	T	T	Y	T	Y	T	T	T	Y	Y	Y	Y	Y	N	T
S1A_532773289	A/C	1A	532773289	+	NA	NA	NA	NA	NA	NA	M	M	M	A	M	A	M	M	A	A	M	C	C	M	M	M	M	M	M	M	M	M	N	M	A	A	C	A	M	M	A	A	M	M	M	M	M	N	A
S1A_532786451	G/T	1A	532786451	+	NA	NA	NA	NA	NA	NA	K	G	G	G	G	T	G	T	G	G	G	N	N	K	K	G	T	G	G	G	G	G	N	G	T	G	G	G	G	G	G	G	G	G	K	G	G	N	G
S1A_532786462	G/A	1A	532786462	+	NA	NA	NA	NA	NA	NA	R	G	G	G	G	A	G	A	G	G	G	N	N	R	R	G	A	G	G	G	G	G	N	G	A	G	G	G	G	G	G	G	G	G	R	G	G	N	G
S1A_532814490	C/T	1A	532814490	+	NA	NA	NA	NA	NA	NA	Y	C	C	C	C	T	C	Y	C	C	C	C	C	Y	N	C	T	C	C	C	C	C	C	C	Y	C	C	N	C	N	C	C	C	C	C	C	C	C	C
S1A_532918577	G/C	1A	532918577	+	NA	NA	NA	NA	NA	NA	S	G	G	N	G	C	G	S	C	G	G	C	N	G	N	G	C	G	G	G	G	G	C	G	C	G	G	G	G	N	G	G	G	G	G	G	G	C	G
S1A_532918579	G/A	1A	532918579	+	NA	NA	NA	NA	NA	NA	G	G	G	N	G	G	G	G	A	G	G	A	N	G	N	G	G	G	G	G	G	G	A	G	G	G	G	G	G	N	G	G	G	G	G	G	G	A	G
S1A_532918580	T/A	1A	532918580	+	NA	NA	NA	NA	NA	NA	T	T	T	N	T	T	T	T	A	T	T	A	N	T	N	T	T	T	T	T	T	T	A	T	T	T	T	T	T	N	T	T	T	T	T	T	T	A	T
S1A_532918594	A/C	1A	532918594	+	NA	NA	NA	NA	NA	NA	A	A	A	N	A	A	A	A	C	A	A	C	N	A	N	A	A	A	A	A	A	A	C	A	A	A	A	A	A	N	A	A	A	A	A	A	A	C	A
S1A_532918630	A/C	1A	532918630	+	NA	NA	NA	NA	NA	NA	A	A	A	N	A	A	A	A	C	A	A	C	N	A	N	A	A	A	A	A	A	A	C	A	A	A	A	A	A	N	A	A	A	A	A	A	A	C	A
S1A_533219216	T/C	1A	533219216	+	NA	NA	NA	NA	NA	NA	Y	T	T	T	T	C	T	T	T	T	T	N	T	Y	T	T	Y	T	T	T	T	T	T	T	C	T	T	T	T	T	T	T	T	T	T	T	T	T	T
S1A_533219217	A/G	1A	533219217	+	NA	NA	NA	NA	NA	NA	R	A	A	A	R	G	A	A	R	R	R	N	G	R	R	R	G	R	R	A	A	A	G	R	G	R	R	R	R	A	R	R	A	A	A	R	A	G	A
S1A_533219220	G/A	1A	533219220	+	NA	NA	NA	NA	NA	NA	G	G	G	G	R	G	G	G	R	R	R	N	A	G	R	R	R	R	R	G	G	G	A	R	G	R	R	R	R	G	R	R	G	G	G	R	G	A	G
S1A_533253309	C/A	1A	533253309	+	NA	NA	NA	NA	NA	NA	C	C	C	C	C	C	M	C	C	C	M	M	M	M	C	M	C	C	C	C	C	C	C	C	C	C	C	M	C	C	M	M	C	C	C	C	C	C	C
S1A_533253321	C/A	1A	533253321	+	NA	NA	NA	NA	NA	NA	C	C	C	C	C	C	M	C	C	C	M	M	M	M	C	M	C	C	C	C	C	C	C	C	C	C	C	M	C	C	M	M	C	C	C	C	C	C	C
S1A_533670334	A/G	1A	533670334	+	NA	NA	NA	NA	NA	NA	A	A	A	A	A	A	A	A	R	A	A	G	G	A	A	A	A	A	A	A	A	A	G	A	R	A	A	N	A	A	A	A	A	A	A	A	A	G	A
S1A_533670346	C/T	1A	533670346	+	NA	NA	NA	NA	NA	NA	Y	C	C	Y	C	C	C	Y	Y	C	C	T	T	Y	Y	C	T	C	C	C	C	C	T	C	T	C	C	N	C	C	C	C	C	C	C	C	C	T	C
S1A_533670362	C/T	1A	533670362	+	NA	NA	NA	NA	NA	NA	N	C	C	C	C	C	C	C	C	C	C	T	T	C	C	C	C	C	C	N	C	C	T	N	N	C	N	N	C	C	C	N	C	C	N	C	C	T	C
S1A_533670377	T/C	1A	533670377	+	NA	NA	NA	NA	NA	NA	N	T	T	T	T	T	T	T	T	T	T	C	C	T	T	T	T	T	T	N	T	T	C	N	N	T	N	N	T	T	T	N	T	T	N	T	T	C	T
S1A_533902931	T/C	1A	533902931	+	NA	NA	NA	NA	NA	NA	T	Y	T	Y	T	C	C	Y	Y	C	C	T	T	C	T	T	T	C	T	T	C	C	T	C	Y	C	T	Y	C	T	C	Y	C	C	C	T	T	T	C
S1A_533902988	T/A	1A	533902988	+	NA	NA	NA	NA	NA	NA	W	T	T	W	T	T	T	W	T	T	T	T	T	T	T	T	A	T	T	T	T	T	T	T	T	T	T	T	T	T	T	T	T	T	T	T	T	T	T
S1A_533902989	C/A	1A	533902989	+	NA	NA	NA	NA	NA	NA	M	C	C	M	C	C	C	M	C	C	C	C	C	C	C	C	A	C	C	C	C	C	C	C	C	C	C	C	C	C	C	C	C	C	C	C	C	C	C
S1A_534051560	A/G	1A	534051560	+	NA	NA	NA	NA	NA	NA	A	R	A	A	A	A	R	A	A	A	R	R	R	R	A	R	A	A	A	R	A	A	A	A	A	A	R	R	A	R	R	R	A	A	R	A	A	A	A
S1A_534051573	C/T	1A	534051573	+	NA	NA	NA	NA	NA	NA	C	Y	C	C	C	C	Y	C	C	C	Y	Y	Y	Y	C	Y	C	C	C	Y	C	C	C	C	C	C	Y	Y	C	Y	Y	Y	C	C	Y	C	C	C	C
S1A_534051577	T/C	1A	534051577	+	NA	NA	NA	NA	NA	NA	T	Y	T	T	T	T	Y	T	Y	T	Y	C	C	Y	T	Y	T	T	T	Y	T	T	C	T	C	T	Y	Y	T	Y	Y	Y	T	T	Y	T	T	C	T
S1A_534055716	T/C	1A	534055716	+	NA	NA	NA	NA	NA	NA	C	Y	C	T	C	T	T	Y	T	T	T	N	N	N	C	C	C	T	C	C	C	T	N	T	T	T	C	Y	T	C	T	Y	T	T	T	C	C	N	T
S1A_534170180	G/A	1A	534170180	+	NA	NA	NA	NA	NA	NA	G	G	G	G	G	G	G	G	G	G	G	G	G	G	G	G	G	R	G	G	G	G	G	G	G	G	G	G	G	G	G	G	N	G	G	G	R	G	G
S1A_534170188	G/A	1A	534170188	+	NA	NA	NA	NA	NA	NA	G	G	R	G	G	G	R	G	G	G	G	G	G	G	G	G	G	G	G	G	G	G	G	G	G	G	G	G	G	R	R	R	N	G	R	R	G	G	G
S1A_534170195	A/T	1A	534170195	+	NA	NA	NA	NA	NA	NA	A	A	W	A	A	A	W	A	A	A	A	A	A	A	A	A	A	A	A	A	A	A	A	A	A	A	A	A	A	W	W	W	N	A	W	W	A	A	A
S1A_534272127	A/G	1A	534272127	+	NA	NA	NA	NA	NA	NA	R	A	A	A	A	A	A	G	A	A	A	N	N	A	A	A	G	A	A	A	G	A	N	A	A	A	A	A	A	A	A	A	A	A	A	A	A	N	A
S1A_534768653	T/C	1A	534768653	+	NA	NA	NA	NA	NA	NA	T	T	T	C	T	T	T	T	C	C	C	C	C	C	T	T	T	C	T	N	T	Y	C	C	N	C	T	T	C	T	T	T	C	T	Y	T	N	C	C
S1A_534938841	G/A	1A	534938841	+	NA	NA	NA	NA	NA	NA	R	G	A	G	A	G	G	G	G	G	G	N	N	G	A	A	A	G	A	A	G	R	N	G	N	G	A	R	G	N	N	A	G	G	G	A	A	N	G
S1A_534938872	A/C	1A	534938872	+	NA	NA	NA	NA	NA	NA	M	A	C	A	C	A	A	A	A	A	A	N	N	A	C	C	C	A	C	C	A	M	N	A	N	A	C	M	A	N	N	C	A	A	A	C	C	N	A
S1A_535077945	C/T	1A	535077945	+	NA	NA	NA	NA	NA	NA	Y	Y	T	C	T	C	C	C	C	C	C	C	C	C	Y	T	C	C	T	T	C	C	C	C	C	C	T	C	C	T	Y	T	C	C	C	T	T	C	C
S1A_535433567	G/C	1A	535433567	+	NA	NA	NA	NA	NA	NA	C	G	C	G	C	C	G	C	G	G	G	G	G	G	N	C	C	G	C	C	N	G	G	G	G	G	C	N	G	C	G	C	G	N	S	C	C	G	G
S1A_535436047	T/A	1A	535436047	+	NA	NA	NA	NA	NA	NA	W	T	T	W	T	T	T	W	T	W	T	W	W	W	T	T	T	W	T	T	T	W	W	W	W	W	T	T	W	T	T	T	W	T	W	T	T	W	W
S1A_535481690	C/T	1A	535481690	+	NA	NA	NA	NA	NA	NA	Y	N	Y	C	Y	Y	C	C	Y	C	N	T	Y	C	Y	Y	T	Y	Y	Y	Y	C	Y	Y	Y	C	Y	C	C	Y	C	T	N	C	Y	Y	Y	Y	C
S1A_535481692	A/G	1A	535481692	+	NA	NA	NA	NA	NA	NA	R	N	R	A	R	R	A	A	R	A	N	G	R	A	R	R	G	R	R	R	R	A	R	R	R	A	R	A	A	R	A	G	N	A	R	R	R	R	A
S1A_535481712	C/G	1A	535481712	+	NA	NA	NA	NA	NA	NA	S	N	C	C	C	S	C	C	S	C	N	G	S	C	C	C	C	S	C	C	C	C	S	S	S	C	C	C	C	C	C	C	N	C	S	C	C	S	C
S1A_535481719	T/A	1A	535481719	+	NA	NA	NA	NA	NA	NA	W	N	W	T	W	W	T	T	W	T	N	A	W	T	W	W	A	W	W	W	W	T	W	W	W	T	W	T	T	W	T	A	N	T	W	W	W	W	T
S1A_535481721	A/G	1A	535481721	+	NA	NA	NA	NA	NA	NA	A	N	A	A	A	A	A	A	A	A	N	A	A	A	A	A	G	A	A	A	R	A	A	A	A	A	A	A	A	A	A	A	N	A	A	A	A	A	A
S1A_535858090	G/A	1A	535858090	+	NA	NA	NA	NA	NA	NA	A	R	A	G	A	G	G	G	R	G	G	A	A	G	A	A	A	G	A	A	R	G	A	G	R	G	A	R	G	A	R	R	G	G	G	A	A	G	G
S1A_536172046	G/C	1A	536172046	+	NA	NA	NA	NA	NA	NA	S	S	C	G	C	G	G	G	G	G	G	C	C	G	S	C	G	G	C	C	S	S	C	G	S	G	C	C	G	C	G	S	G	G	G	C	C	C	G
S1A_536172052	G/C	1A	536172052	+	NA	NA	NA	NA	NA	NA	S	S	C	G	C	G	G	G	G	G	G	C	C	G	S	C	G	G	C	C	S	S	C	G	S	G	C	C	G	C	G	S	G	G	G	C	C	C	G
S1A_536172066	A/C	1A	536172066	+	NA	NA	NA	NA	NA	NA	M	M	A	M	A	C	C	C	A	A	A	A	A	M	A	A	A	A	A	A	M	A	A	A	M	A	A	A	A	A	C	M	A	C	M	A	A	A	A
S1A_536172088	T/C	1A	536172088	+	NA	NA	NA	NA	NA	NA	Y	Y	C	T	C	T	T	T	T	T	T	C	C	T	Y	C	T	T	C	C	Y	Y	C	T	Y	T	C	C	T	C	T	Y	T	T	T	C	C	C	T
S1A_536294589	G/A	1A	536294589	+	NA	NA	NA	NA	NA	NA	R	R	G	R	G	A	A	A	G	G	G	G	G	G	G	G	G	G	N	G	N	G	G	G	R	G	N	G	G	N	A	R	G	A	N	G	G	R	G
S1A_536609007	C/T	1A	536609007	+	NA	NA	NA	NA	NA	NA	Y	C	C	C	C	T	C	T	C	C	C	C	C	T	C	C	C	C	C	C	C	C	C	C	C	C	C	C	C	C	C	C	N	N	C	C	C	Y	C
S1A_536664287	A/C	1A	536664287	+	NA	NA	NA	NA	NA	NA	A	M	A	M	A	A	C	A	A	A	A	A	A	A	A	A	C	A	A	A	A	A	A	A	A	A	A	M	A	A	M	M	A	C	M	A	A	A	N
S1A_537072332	C/T	1A	537072332	+	NA	NA	NA	NA	NA	NA	C	C	C	C	C	C	C	C	T	T	C	C	C	C	Y	C	C	C	C	C	Y	C	C	C	C	C	C	C	C	C	C	C	C	C	C	C	C	C	C
S1A_537093931	A/G	1A	537093931	+	NA	NA	NA	NA	NA	NA	A	A	A	A	A	A	A	A	R	G	A	A	A	A	A	A	A	A	A	A	R	A	A	A	A	A	A	A	A	A	A	A	A	A	A	A	A	A	A
S1A_537148404	G/T	1A	537148404	+	NA	NA	NA	NA	NA	NA	G	G	G	G	G	G	G	G	G	G	K	G	G	G	K	G	G	K	G	K	G	G	G	G	G	K	G	K	K	K	K	G	G	G	K	G	K	K	K
S1A_537541244	C/T	1A	537541244	+	NA	NA	NA	NA	NA	NA	C	N	C	C	C	T	T	Y	T	T	C	C	C	N	C	C	C	C	N	C	C	C	C	C	N	C	C	C	C	C	C	T	C	C	C	C	C	C	C
S1A_537889065	C/T	1A	537889065	+	NA	NA	NA	NA	NA	NA	C	T	C	C	C	T	T	Y	T	N	C	C	C	C	C	C	C	C	C	C	C	C	C	C	C	C	C	C	C	C	C	Y	C	C	N	C	C	C	C
S1A_537889067	T/G	1A	537889067	+	NA	NA	NA	NA	NA	NA	T	G	T	T	T	G	G	K	G	N	T	T	T	T	T	T	T	T	T	T	T	T	T	T	T	T	T	T	T	T	T	K	T	T	N	T	T	T	T
S1A_537889237	C/T	1A	537889237	+	NA	NA	NA	NA	NA	NA	Y	Y	C	C	C	T	T	Y	Y	T	C	C	C	C	C	C	C	C	C	C	Y	C	C	C	C	C	C	C	C	C	C	Y	C	C	C	C	C	C	C
S1A_537889297	A/G	1A	537889297	+	NA	NA	NA	NA	NA	NA	A	G	A	A	A	G	G	R	R	G	A	A	A	A	R	A	A	A	A	A	A	A	A	A	A	A	A	A	A	A	A	R	A	A	A	A	A	A	A
S1A_538720863	C/T	1A	538720863	+	NA	NA	NA	NA	NA	NA	C	C	C	Y	C	C	C	C	C	C	N	C	Y	C	C	C	C	C	C	C	C	C	C	C	C	C	C	N	C	C	C	C	C	C	Y	C	C	Y	C
S1A_538783209	C/T	1A	538783209	+	NA	NA	NA	NA	NA	NA	C	Y	N	C	T	C	C	Y	C	C	C	T	T	C	N	T	C	Y	T	N	C	C	N	T	N	C	N	C	C	N	C	Y	C	C	C	T	N	C	C
S1A_539737658	G/C	1A	539737658	+	NA	NA	NA	NA	NA	NA	G	C	G	G	N	G	C	G	C	N	G	G	G	G	S	G	G	S	G	G	G	G	G	C	G	G	G	G	G	G	G	G	G	G	G	G	G	G	G
S1A_540136972	C/T	1A	540136972	+	NA	NA	NA	NA	NA	NA	N	C	T	N	N	C	C	Y	C	C	C	C	C	Y	C	N	T	T	T	T	Y	T	C	Y	T	C	T	N	N	N	T	C	C	T	T	C	C	N	C
S1A_540357284	G/A	1A	540357284	+	NA	NA	NA	NA	NA	NA	A	G	G	A	G	A	G	A	G	G	G	G	G	G	G	G	G	G	G	G	G	A	G	G	G	G	G	G	G	G	G	G	G	G	G	G	G	G	G
S1A_540357299	G/A	1A	540357299	+	NA	NA	NA	NA	NA	NA	A	G	A	A	G	A	G	A	G	G	G	G	G	G	G	A	G	G	A	A	G	A	G	G	G	G	A	G	G	A	G	G	G	G	G	G	G	G	G
S1A_540390730	G/A	1A	540390730	+	NA	NA	NA	NA	NA	NA	G	G	G	G	G	G	N	G	G	G	R	G	G	G	G	R	G	G	G	G	G	G	G	G	G	G	G	G	G	G	R	G	G	G	G	G	G	A	G
S1A_540390754	A/G	1A	540390754	+	NA	NA	NA	NA	NA	NA	A	A	A	A	A	A	N	A	A	A	R	A	A	A	A	R	A	A	A	A	A	A	A	A	A	A	A	A	A	A	R	A	A	A	A	A	A	G	A
S1A_540414611	A/G	1A	540414611	+	NA	NA	NA	NA	NA	NA	R	A	A	R	A	G	A	G	A	A	A	A	A	A	R	A	A	A	A	A	G	G	A	N	A	A	A	A	A	A	A	A	A	G	A	A	A	A	A
S1A_540664712	T/C	1A	540664712	+	NA	NA	NA	NA	NA	NA	Y	Y	T	Y	T	C	T	C	T	T	T	T	T	T	Y	T	T	T	T	T	Y	C	T	T	T	T	T	T	Y	T	N	T	T	C	T	T	T	T	T
S1A_540665495	G/A	1A	540665495	+	NA	NA	NA	NA	NA	NA	G	A	G	N	G	N	A	N	R	A	A	G	G	A	G	G	A	R	G	G	N	N	G	G	N	A	G	A	A	G	A	R	A	N	R	G	G	G	A
S1A_540674011	T/C	1A	540674011	+	NA	NA	NA	NA	NA	NA	Y	T	T	C	T	C	T	Y	N	T	T	T	T	T	T	T	T	T	T	T	C	Y	T	T	T	T	T	T	T	T	T	T	T	C	T	T	T	T	T
S1A_540712921	C/T	1A	540712921	+	NA	NA	NA	NA	NA	NA	C	C	C	T	C	T	C	Y	C	C	C	N	C	C	C	N	C	C	C	C	Y	Y	C	C	C	C	C	C	C	C	C	C	C	Y	C	C	C	C	C
S1A_541729095	A/G	1A	541729095	+	NA	NA	NA	NA	NA	NA	R	A	A	G	A	A	A	R	A	A	A	A	A	R	A	A	A	R	A	A	R	G	R	A	R	A	A	A	A	A	A	A	A	G	A	A	A	R	A
S1A_542060494	T/G	1A	542060494	+	NA	NA	NA	NA	NA	NA	T	T	T	K	K	T	T	T	T	T	N	T	N	K	T	T	N	N	N	N	K	T	T	N	K	T	K	N	T	K	T	K	N	K	T	T	N	T	T
S1A_542358705	G/C	1A	542358705	+	NA	NA	NA	NA	NA	NA	S	G	S	C	S	C	G	S	N	C	C	S	S	S	S	S	G	S	G	S	G	C	S	S	S	C	S	G	C	S	G	S	C	C	S	S	C	S	C
S1A_542758730	A/G	1A	542758730	+	NA	NA	NA	NA	NA	NA	A	A	A	A	A	N	A	A	N	G	G	A	A	A	A	A	A	A	A	A	A	A	N	A	A	G	N	A	G	N	N	A	G	G	R	A	A	A	N
S1A_543061007	C/T	1A	543061007	+	NA	NA	NA	NA	NA	NA	Y	C	C	C	C	C	C	C	Y	C	C	Y	Y	C	Y	Y	Y	Y	C	C	C	C	Y	C	C	Y	C	Y	C	C	Y	C	C	C	C	Y	Y	Y	C
S1A_543171561	G/A	1A	543171561	+	NA	NA	NA	NA	NA	NA	G	G	G	G	N	G	G	G	G	G	G	N	G	G	G	G	G	G	G	G	G	G	G	N	G	G	G	N	G	G	N	G	G	A	R	G	G	G	G
S1A_543254207	T/C	1A	543254207	+	NA	NA	NA	NA	NA	NA	T	T	T	T	N	C	T	T	Y	C	C	T	T	Y	T	T	T	T	T	T	T	T	T	T	T	C	T	T	C	T	T	T	C	C	Y	T	T	T	C
S1A_543970390	G/C	1A	543970390	+	NA	NA	NA	NA	NA	NA	G	G	S	G	G	G	G	G	G	G	G	G	G	G	G	S	G	G	S	S	G	G	G	G	G	G	G	N	G	G	G	G	G	G	S	N	N	G	G
S1A_543970396	A/G	1A	543970396	+	NA	NA	NA	NA	NA	NA	R	A	A	A	A	A	A	R	R	R	R	A	A	R	A	A	A	A	A	A	A	R	A	R	A	A	A	N	R	A	A	A	R	A	A	N	N	A	A
S1A_544914242	C/A	1A	544914242	+	NA	NA	NA	NA	NA	NA	C	A	C	A	C	A	M	A	C	C	C	C	C	M	M	C	A	C	C	C	M	M	A	C	M	C	C	A	C	C	A	M	C	A	C	M	C	M	C
S1A_544915102	C/T	1A	544915102	+	NA	NA	NA	NA	NA	NA	C	T	C	T	C	C	Y	C	C	C	C	C	C	Y	C	C	T	C	C	C	Y	T	T	C	T	C	C	T	C	C	T	Y	C	T	C	Y	C	C	C
S1A_544915120	T/G	1A	544915120	+	NA	NA	NA	NA	NA	NA	K	G	T	G	T	G	K	K	T	T	T	T	T	K	K	T	G	T	T	T	K	G	G	T	G	T	T	G	T	T	G	K	T	G	T	K	T	T	T
S1A_544915129	G/T	1A	544915129	+	NA	NA	NA	NA	NA	NA	G	T	G	T	G	G	K	G	G	G	G	G	G	K	G	G	T	G	G	G	K	T	T	G	T	G	G	T	G	G	T	K	G	T	G	K	G	G	G
S1A_544933520	G/A	1A	544933520	+	NA	NA	NA	NA	NA	NA	G	G	G	N	G	G	G	G	A	A	A	G	G	G	G	G	G	G	G	G	N	G	G	G	G	A	G	G	A	G	G	G	A	G	R	N	G	G	A
S1A_545762254	G/A	1A	545762254	+	NA	NA	NA	NA	NA	NA	G	A	N	A	G	G	R	G	N	G	G	G	G	G	G	G	A	G	G	G	R	A	A	G	R	G	G	N	N	G	A	R	G	A	N	R	G	G	G
S1A_545853167	A/G	1A	545853167	+	NA	NA	NA	NA	NA	NA	G	A	G	A	A	A	R	A	N	A	A	G	G	R	G	G	A	G	G	G	A	A	A	N	G	A	G	A	N	G	A	R	A	A	R	G	G	G	A
S1A_546005221	G/A	1A	546005221	+	NA	NA	NA	NA	NA	NA	G	R	R	G	G	G	G	R	G	G	R	G	G	G	G	R	G	G	R	A	G	G	G	R	G	R	R	G	R	G	G	R	R	G	R	R	R	G	R
S1A_546031772	T/G	1A	546031772	+	NA	NA	NA	NA	NA	NA	T	K	T	G	N	T	K	T	G	G	G	T	T	T	N	T	G	T	T	T	G	G	T	T	T	G	T	G	G	T	G	K	G	G	T	K	T	T	G
S1A_546044944	G/A	1A	546044944	+	NA	NA	NA	NA	NA	NA	A	G	G	G	A	A	G	A	G	N	G	G	G	R	R	G	G	G	G	G	A	R	G	G	G	G	N	G	G	G	G	G	G	G	G	G	G	G	G
S1A_547274361	C/T	1A	547274361	+	NA	NA	NA	NA	NA	NA	C	T	T	C	C	C	N	C	C	C	N	T	T	T	N	N	C	T	T	N	C	C	C	T	N	C	T	N	C	T	C	T	C	C	T	T	T	T	C
S1A_547274365	G/T	1A	547274365	+	NA	NA	NA	NA	NA	NA	G	T	T	G	G	G	N	G	G	G	N	T	T	T	N	N	G	T	T	N	G	G	G	T	N	G	T	N	G	T	G	T	G	G	T	T	T	T	G
S1A_547323163	C/T	1A	547323163	+	NA	NA	NA	NA	NA	NA	C	Y	C	T	C	C	Y	C	Y	T	T	C	C	C	Y	C	T	C	C	C	T	T	T	C	Y	T	C	T	T	C	T	Y	T	T	Y	C	C	C	T
S1A_547419510	G/A	1A	547419510	+	NA	NA	NA	NA	NA	NA	G	R	G	A	G	G	R	G	G	G	G	G	G	G	A	G	A	G	G	G	R	A	A	G	N	G	G	A	G	G	A	R	G	A	G	R	G	R	G
S1A_547599643	A/T	1A	547599643	+	NA	NA	NA	NA	NA	NA	W	A	A	A	A	T	A	W	T	T	T	A	A	A	A	A	A	A	A	A	W	A	A	A	A	T	A	A	T	A	A	A	T	A	A	A	A	A	T
S1A_547723237	C/G	1A	547723237	+	NA	NA	NA	NA	NA	NA	C	C	S	C	C	S	C	C	C	C	S	C	S	C	C	S	C	N	C	C	N	C	S	C	C	C	S	C	C	C	C	C	C	C	S	C	C	C	C
S1A_547723239	T/C	1A	547723239	+	NA	NA	NA	NA	NA	NA	T	T	Y	T	T	Y	T	T	T	T	Y	T	Y	T	T	Y	T	N	T	T	N	T	Y	T	T	T	Y	T	T	T	T	T	T	T	Y	T	T	T	T
S1A_547919021	G/A	1A	547919021	+	NA	NA	NA	NA	NA	NA	N	G	N	A	A	N	N	G	N	G	G	A	A	N	G	A	G	A	A	A	G	G	G	A	N	G	A	N	N	A	G	R	N	G	R	R	N	A	G
S1A_547919049	C/G	1A	547919049	+	NA	NA	NA	NA	NA	NA	N	G	N	C	C	N	N	C	N	C	C	C	C	N	G	C	G	C	C	C	C	G	G	C	N	C	C	N	N	C	G	S	N	G	S	S	N	C	C
S1A_547919073	A/G	1A	547919073	+	NA	NA	NA	NA	NA	NA	N	G	N	A	A	N	N	A	N	A	A	A	A	N	G	A	G	A	A	A	A	G	G	A	N	A	A	N	N	A	G	R	N	G	R	R	N	A	A
S1A_547919077	T/C	1A	547919077	+	NA	NA	NA	NA	NA	NA	N	T	N	T	T	N	N	C	N	C	C	T	T	N	T	T	T	T	T	T	C	T	T	T	N	C	T	N	N	T	T	T	N	T	T	T	N	T	C
S1A_548440929	G/T	1A	548440929	+	NA	NA	NA	NA	NA	NA	K	N	T	G	N	G	K	G	G	G	G	T	T	T	G	T	G	N	T	T	G	T	G	T	G	G	N	G	G	T	G	G	G	G	K	K	N	K	G
S1A_548466244	A/G	1A	548466244	+	NA	NA	NA	NA	NA	NA	A	R	N	G	R	A	A	A	A	N	N	A	R	A	N	R	R	A	R	G	A	A	A	R	A	R	G	R	A	A	N	G	A	R	N	A	A	A	N
S1A_548466252	G/A	1A	548466252	+	NA	NA	NA	NA	NA	NA	G	R	N	A	R	G	G	G	G	N	N	G	R	G	N	R	R	G	R	A	G	G	G	R	G	R	A	R	G	G	N	A	G	R	N	G	G	G	N
S1A_549282954	T/C	1A	549282954	+	NA	NA	NA	NA	NA	NA	T	T	T	T	T	T	T	T	Y	C	T	T	T	Y	C	T	T	T	T	T	C	T	T	T	T	T	T	T	T	T	T	T	T	T	T	T	T	T	T
S1A_549282971	C/T	1A	549282971	+	NA	NA	NA	NA	NA	NA	C	C	C	C	C	C	C	C	Y	T	C	C	C	Y	T	C	C	C	C	C	T	C	C	C	C	C	C	C	C	C	C	C	C	C	C	C	C	C	C
S1A_549295002	C/A	1A	549295002	+	NA	NA	NA	NA	NA	NA	C	C	C	C	C	C	C	C	A	A	C	C	N	M	C	C	C	N	C	C	M	C	C	C	C	C	C	C	C	C	C	C	C	C	C	C	C	C	C
S1A_549314853	A/G	1A	549314853	+	NA	NA	NA	NA	NA	NA	A	A	A	A	A	A	A	A	R	G	A	A	A	R	R	A	A	A	A	A	G	A	N	A	A	A	A	A	A	A	A	A	A	A	A	A	A	A	A
S1A_549314854	T/C	1A	549314854	+	NA	NA	NA	NA	NA	NA	T	T	T	T	T	T	T	T	Y	C	T	T	T	Y	Y	T	T	T	T	T	C	T	N	T	T	T	T	T	T	T	T	T	T	T	T	T	T	T	T
S1A_549314870	A/T	1A	549314870	+	NA	NA	NA	NA	NA	NA	A	A	A	A	A	A	A	A	W	T	A	A	A	W	W	A	A	A	A	A	T	A	N	A	A	A	A	A	A	A	A	A	A	A	A	A	A	A	A
S1A_549421325	T/C	1A	549421325	+	NA	NA	NA	NA	NA	NA	T	T	Y	N	T	C	T	T	Y	Y	Y	T	T	T	T	N	N	Y	Y	T	T	T	N	T	Y	T	T	N	T	T	N	T	T	N	Y	T	T	C	Y
S1A_549421331	C/T	1A	549421331	+	NA	NA	NA	NA	NA	NA	C	C	Y	N	C	T	C	C	Y	Y	Y	C	C	C	C	N	N	Y	Y	C	C	C	N	C	Y	C	C	N	C	C	N	C	C	N	Y	C	C	T	Y
S1A_549421366	A/T	1A	549421366	+	NA	NA	NA	NA	NA	NA	A	A	W	N	A	T	A	A	W	W	W	A	A	A	A	N	N	W	W	A	A	A	N	A	W	A	A	N	A	A	N	A	A	N	W	A	A	T	W
S1A_549422225	C/G	1A	549422225	+	NA	NA	NA	NA	NA	NA	C	S	C	G	C	G	N	C	C	C	C	C	C	C	S	C	G	C	C	C	C	C	N	C	S	C	C	G	C	C	G	S	C	G	S	S	C	S	C
S1A_549422245	C/G	1A	549422245	+	NA	NA	NA	NA	NA	NA	C	S	C	G	C	G	N	C	C	C	C	C	C	C	S	C	G	C	C	C	C	C	N	C	S	C	C	G	C	C	G	S	C	G	S	S	C	S	C
S1A_549422257	T/C	1A	549422257	+	NA	NA	NA	NA	NA	NA	T	Y	T	C	T	C	N	T	T	T	T	T	T	T	Y	Y	C	T	T	Y	T	T	N	T	Y	T	T	C	T	T	C	Y	T	C	Y	Y	T	Y	T
S1A_549422263	T/C	1A	549422263	+	NA	NA	NA	NA	NA	NA	T	Y	T	C	T	C	N	T	T	T	T	T	T	T	Y	Y	C	T	T	Y	T	T	N	T	Y	T	T	C	T	T	C	Y	T	C	Y	Y	T	Y	T
S1A_549422405	G/A	1A	549422405	+	NA	NA	NA	NA	NA	NA	G	A	N	N	G	A	R	G	G	G	G	G	G	G	A	G	A	G	G	G	R	G	A	G	N	G	G	A	G	N	A	A	G	A	G	R	G	R	G
S1A_549422427	C/T	1A	549422427	+	NA	NA	NA	NA	NA	NA	C	T	N	N	C	T	Y	C	C	C	C	C	C	C	T	C	T	C	C	C	Y	C	T	C	N	C	C	T	C	N	T	T	C	T	C	Y	C	Y	C
S1A_549597715	A/T	1A	549597715	+	NA	NA	NA	NA	NA	NA	W	N	A	A	A	A	N	A	W	N	N	T	A	A	T	A	A	A	A	A	T	W	A	A	A	N	A	A	A	A	W	A	A	A	W	W	A	A	A
S1A_549597740	C/T	1A	549597740	+	NA	NA	NA	NA	NA	NA	Y	N	C	C	C	C	N	C	Y	N	N	T	C	C	T	C	C	C	C	C	T	Y	C	C	C	N	C	C	C	C	Y	C	C	C	Y	Y	C	C	C
S1A_549638036	G/A	1A	549638036	+	NA	NA	NA	NA	NA	NA	G	R	G	R	G	R	R	G	G	G	G	G	G	G	R	G	R	G	G	N	R	G	R	G	R	G	G	R	G	G	R	G	G	R	G	R	G	R	G
S1A_549638061	G/C	1A	549638061	+	NA	NA	NA	NA	NA	NA	G	S	G	S	G	S	S	G	G	G	G	G	G	G	S	G	S	G	G	N	S	G	S	G	S	G	G	S	G	G	S	G	G	S	G	S	G	S	G
S1A_549708998	T/A	1A	549708998	+	NA	NA	NA	NA	NA	NA	W	W	T	T	A	T	W	A	T	T	T	T	T	T	T	T	T	T	T	T	T	A	T	T	T	T	T	T	T	T	T	W	T	T	W	W	A	T	T
S1A_549851130	G/C	1A	549851130	+	NA	NA	NA	NA	NA	NA	N	C	G	C	C	C	C	C	N	G	G	G	G	G	G	G	C	G	G	N	G	C	C	G	C	G	N	C	G	G	C	C	G	C	G	C	C	G	G
S1A_549851181	A/C	1A	549851181	+	NA	NA	NA	NA	NA	NA	C	C	A	C	C	C	C	C	A	A	A	A	A	A	M	A	C	A	A	A	M	C	C	A	M	A	A	C	A	A	C	C	A	C	A	C	C	M	A
S1A_549852898	C/T	1A	549852898	+	NA	NA	NA	NA	NA	NA	C	Y	C	C	N	C	Y	N	N	C	C	C	C	C	C	C	C	C	C	C	C	N	C	C	C	C	N	C	C	C	C	Y	C	C	Y	Y	T	C	C
S1A_549942151	G/A	1A	549942151	+	NA	NA	NA	NA	NA	NA	G	G	R	G	G	R	G	G	R	G	G	G	G	G	G	G	G	G	G	G	G	R	G	G	G	G	G	G	G	G	G	G	G	G	G	G	G	R	G
S1A_550296902	T/C	1A	550296902	+	NA	NA	NA	NA	NA	NA	Y	Y	T	T	C	T	T	T	T	T	T	T	T	T	N	T	T	T	T	T	T	N	T	T	T	T	T	T	T	T	T	C	T	T	T	Y	N	T	T
S1A_550296906	C/T	1A	550296906	+	NA	NA	NA	NA	NA	NA	Y	Y	C	C	T	C	C	C	C	C	C	C	C	C	N	C	C	C	C	C	C	N	C	C	C	C	C	C	C	C	C	T	C	C	C	Y	N	C	C
S1A_550725333	C/T	1A	550725333	+	NA	NA	NA	NA	NA	NA	C	C	Y	C	C	C	C	C	C	Y	C	C	C	C	C	Y	Y	C	N	N	Y	C	C	C	C	C	C	N	C	Y	N	C	C	C	C	C	C	C	C
S1A_550725346	C/A	1A	550725346	+	NA	NA	NA	NA	NA	NA	C	C	C	C	M	C	C	C	C	C	C	C	C	C	C	C	C	M	N	N	C	C	C	C	C	C	C	N	M	C	N	C	C	C	C	C	C	C	C
S1A_550725357	T/G	1A	550725357	+	NA	NA	NA	NA	NA	NA	T	T	T	K	K	K	T	T	K	T	K	G	T	T	T	T	K	K	N	N	T	T	K	K	T	K	T	N	K	T	N	T	T	T	T	T	T	K	K
S1A_550742533	G/A	1A	550742533	+	NA	NA	NA	NA	NA	NA	G	G	G	A	N	G	G	N	N	G	A	G	G	G	G	G	N	G	G	G	N	G	G	G	G	R	G	G	A	G	G	G	A	G	R	G	G	G	A
S1A_550968815	C/G	1A	550968815	+	NA	NA	NA	NA	NA	NA	S	C	C	C	S	S	C	S	S	G	N	C	G	N	C	C	C	S	C	C	C	C	S	S	S	S	C	C	C	C	C	N	C	C	C	C	N	S	S
S1A_551210556	A/G	1A	551210556	+	NA	NA	NA	NA	NA	NA	R	A	A	R	R	R	R	R	R	R	A	A	R	A	R	A	A	R	A	A	R	R	R	R	R	R	A	R	R	A	R	A	A	R	R	R	R	R	R
S1A_551210579	G/A	1A	551210579	+	NA	NA	NA	NA	NA	NA	R	G	G	R	R	R	R	R	R	R	G	G	R	G	R	G	G	R	G	G	R	R	R	R	R	R	G	R	R	G	R	G	G	R	R	R	R	R	R
S1A_551280832	C/G	1A	551280832	+	NA	NA	NA	NA	NA	NA	G	C	C	S	G	S	S	S	S	S	N	C	S	C	S	N	C	S	C	C	S	C	S	S	S	S	C	S	S	C	S	C	C	S	S	S	S	S	C
S1A_551428126	A/G	1A	551428126	+	NA	NA	NA	NA	NA	NA	A	A	N	A	A	A	A	A	G	G	G	A	A	G	A	N	A	A	N	N	R	A	A	A	A	G	N	A	G	N	A	A	G	A	A	N	N	A	G
S1A_551530557	G/C	1A	551530557	+	NA	NA	NA	NA	NA	NA	G	S	C	G	G	G	C	G	C	C	C	N	G	C	G	N	G	G	C	C	C	G	G	G	G	C	C	N	C	C	G	N	C	G	S	C	N	G	C
S1A_551530589	T/G	1A	551530589	+	NA	NA	NA	NA	NA	NA	T	T	G	T	T	T	T	T	T	T	T	N	T	T	T	N	T	T	G	G	T	T	T	T	T	T	G	N	T	G	T	N	T	T	T	T	N	T	T
S1A_551533044	G/C	1A	551533044	+	NA	NA	NA	NA	NA	NA	G	G	G	G	S	G	G	G	G	G	S	G	G	G	G	G	S	G	G	G	G	S	G	G	G	G	G	G	S	G	G	G	G	G	S	G	G	S	G
S1A_551533050	C/T	1A	551533050	+	NA	NA	NA	NA	NA	NA	C	C	C	C	Y	C	C	C	C	C	Y	C	C	C	C	C	Y	C	C	C	C	Y	C	C	C	C	C	C	Y	C	C	C	C	C	Y	C	C	Y	C
S1A_551543858	C/A	1A	551543858	+	NA	NA	NA	NA	NA	NA	C	M	C	C	C	C	M	C	M	A	A	C	C	C	C	C	C	C	C	C	A	C	C	C	C	A	C	C	A	N	C	A	A	N	M	M	A	C	A
S1A_551592366	G/A	1A	551592366	+	NA	NA	NA	NA	NA	NA	G	G	G	G	G	G	R	G	G	R	R	G	R	G	G	G	G	R	G	R	G	G	R	G	R	G	R	R	G	R	R	G	G	G	G	G	G	R	G
S1A_551592579	C/G	1A	551592579	+	NA	NA	NA	NA	NA	NA	S	C	C	S	C	S	C	S	S	G	C	C	S	S	C	C	C	S	C	C	C	C	S	S	S	S	C	C	S	C	C	C	C	S	C	C	C	C	S
S1A_551592592	A/T	1A	551592592	+	NA	NA	NA	NA	NA	NA	W	A	A	W	A	W	A	W	W	T	A	A	W	W	A	A	A	W	A	A	A	A	W	W	W	W	A	A	W	A	A	A	A	W	A	A	A	A	W
S1A_551736080	A/G	1A	551736080	+	NA	NA	NA	NA	NA	NA	R	A	A	A	A	A	A	G	A	A	A	A	A	G	A	A	A	A	A	A	R	A	N	A	N	A	A	A	A	A	A	N	A	A	N	A	A	A	N
S1A_551787342	A/G	1A	551787342	+	NA	NA	NA	NA	NA	NA	A	A	A	A	A	R	A	A	A	A	A	A	R	A	A	A	A	A	R	A	A	A	R	A	A	A	R	N	A	A	A	A	N	A	G	A	A	A	R
S1A_551787376	T/C	1A	551787376	+	NA	NA	NA	NA	NA	NA	T	T	T	T	T	Y	T	T	T	T	T	T	Y	T	T	T	T	T	Y	T	T	T	Y	T	T	T	Y	N	T	T	T	T	N	T	C	T	T	T	Y
S1A_551881400	T/G	1A	551881400	+	NA	NA	NA	NA	NA	NA	G	T	T	T	G	T	T	G	G	T	T	G	G	G	T	T	T	G	T	T	K	G	T	G	N	T	T	T	T	T	T	T	T	T	T	T	T	K	N
S1A_551910214	C/G	1A	551910214	+	NA	NA	NA	NA	NA	NA	C	S	C	G	C	G	S	N	C	C	C	C	C	C	S	C	G	C	C	C	G	C	G	C	G	C	C	G	C	C	G	S	C	G	C	S	C	S	C
S1A_552281805	G/A	1A	552281805	+	NA	NA	NA	NA	NA	NA	A	R	G	A	N	A	A	A	A	A	G	G	G	A	A	G	A	G	N	G	A	G	A	N	R	G	G	A	G	G	A	N	G	N	G	R	G	A	G
S1A_552526371	C/G	1A	552526371	+	NA	NA	NA	NA	NA	NA	S	S	S	C	C	C	S	S	C	C	S	C	C	C	C	S	C	S	S	S	S	C	C	C	C	C	C	S	C	C	C	S	S	S	S	S	S	S	C
S1A_553566462	C/T	1A	553566462	+	NA	NA	NA	NA	NA	NA	Y	C	C	C	Y	C	C	C	C	C	Y	Y	Y	Y	C	C	C	Y	C	C	C	Y	C	C	Y	Y	C	C	Y	C	C	C	Y	C	C	C	C	Y	Y
S1A_553566476	C/T	1A	553566476	+	NA	NA	NA	NA	NA	NA	Y	C	C	C	Y	C	C	C	C	C	Y	Y	Y	Y	C	C	C	Y	C	C	C	Y	C	C	Y	Y	C	C	Y	C	C	C	Y	C	C	C	C	Y	Y
S1A_553719940	G/A	1A	553719940	+	NA	NA	NA	NA	NA	NA	A	R	R	A	G	G	R	R	G	G	A	N	R	R	A	R	A	R	G	R	G	N	G	R	A	R	R	R	G	R	R	G	R	R	G	G	R	N	R
S1A_553970639	A/G	1A	553970639	+	NA	NA	NA	NA	NA	NA	A	G	A	A	A	A	A	A	A	A	A	A	A	A	R	A	R	A	A	A	R	A	A	A	A	A	A	A	A	A	A	A	A	A	A	A	A	A	A
S1A_554074153	C/T	1A	554074153	+	NA	NA	NA	NA	NA	NA	Y	C	C	C	C	C	N	C	N	Y	C	C	Y	C	Y	C	C	Y	C	C	C	C	C	C	C	C	C	C	C	C	C	C	Y	C	C	Y	C	C	Y
S1A_554074173	G/C	1A	554074173	+	NA	NA	NA	NA	NA	NA	S	G	G	G	G	G	N	G	N	S	G	G	S	G	S	G	G	S	G	G	G	G	G	G	G	G	G	G	G	G	G	G	S	G	G	S	G	G	S
S1A_554211808	T/C	1A	554211808	+	NA	NA	NA	NA	NA	NA	T	T	N	T	T	T	T	T	Y	C	T	T	T	T	T	C	T	T	N	N	T	T	T	T	T	T	N	N	T	C	T	Y	T	T	T	T	N	T	T
S1A_554211824	G/A	1A	554211824	+	NA	NA	NA	NA	NA	NA	G	G	N	G	G	G	G	G	G	G	G	R	G	G	G	G	G	G	N	N	R	G	G	G	G	G	N	N	G	G	G	G	G	G	A	G	N	R	R
S1A_554211827	A/G	1A	554211827	+	NA	NA	NA	NA	NA	NA	R	A	N	A	G	A	A	A	R	A	G	R	G	A	A	A	A	G	N	N	A	G	A	G	R	G	N	N	G	A	A	A	G	A	A	A	N	R	R
S1A_554211833	T/C	1A	554211833	+	NA	NA	NA	NA	NA	NA	T	T	N	T	T	T	T	T	Y	C	T	Y	T	T	T	C	T	T	N	N	Y	T	T	T	T	T	N	N	T	C	T	Y	T	T	C	T	N	Y	Y
S1A_554211838	C/T	1A	554211838	+	NA	NA	NA	NA	NA	NA	C	C	N	C	C	C	C	C	C	C	C	Y	C	C	C	C	C	C	N	N	Y	C	C	C	C	C	N	N	C	C	C	C	C	C	T	C	N	Y	Y
S1A_554306270	C/T	1A	554306270	+	NA	NA	NA	NA	NA	NA	C	C	C	C	C	C	C	C	C	C	Y	C	C	C	N	C	C	C	C	C	N	C	C	Y	C	N	N	C	T	C	C	C	Y	C	Y	C	C	C	C
S1A_554306271	G/A	1A	554306271	+	NA	NA	NA	NA	NA	NA	G	G	G	G	G	G	G	G	G	G	R	G	G	G	N	G	G	G	G	G	N	G	G	R	G	N	N	G	A	G	G	G	R	G	R	G	G	G	G
S1A_554306282	C/T	1A	554306282	+	NA	NA	NA	NA	NA	NA	C	C	C	C	C	C	C	C	C	C	Y	C	C	C	N	C	C	C	C	C	N	C	C	Y	C	N	N	C	T	C	C	C	Y	C	Y	C	C	C	C
S1A_554306292	G/A	1A	554306292	+	NA	NA	NA	NA	NA	NA	A	G	G	R	A	G	G	R	R	G	R	G	G	R	N	G	G	R	G	G	N	A	G	R	A	N	N	R	G	G	R	G	R	R	R	R	G	G	G
S1A_554306298	G/A	1A	554306298	+	NA	NA	NA	NA	NA	NA	A	G	G	R	A	G	G	R	R	G	R	G	G	R	N	G	G	R	G	G	N	A	G	R	A	N	N	R	G	G	R	G	R	R	R	R	G	G	G
S1A_554306301	G/C	1A	554306301	+	NA	NA	NA	NA	NA	NA	C	G	G	S	C	G	G	S	S	G	S	G	G	S	N	G	G	S	G	G	N	C	G	S	C	N	N	S	G	G	S	G	S	S	S	S	G	G	G
S1A_554306319	C/G	1A	554306319	+	NA	NA	NA	NA	NA	NA	G	C	C	S	G	C	C	S	S	C	S	C	C	S	N	C	C	S	C	C	N	G	C	S	G	N	N	S	C	C	S	C	S	S	S	S	C	C	C
S1A_554681868	C/T	1A	554681868	+	NA	NA	NA	NA	NA	NA	C	C	C	C	T	C	C	C	C	C	T	T	T	Y	C	C	C	T	N	C	C	T	C	T	C	T	C	C	T	N	C	C	T	C	T	C	C	T	T
S1A_554826951	C/A	1A	554826951	+	NA	NA	NA	NA	NA	NA	M	C	C	C	A	C	C	C	C	C	A	A	A	N	C	C	C	A	C	C	C	A	C	A	M	N	C	C	A	C	C	C	A	C	M	C	C	N	N
S1A_555072396	G/A	1A	555072396	+	NA	NA	NA	NA	NA	NA	G	G	G	G	A	G	N	G	R	G	A	A	A	N	G	G	G	A	G	G	G	A	N	N	N	N	G	G	A	G	G	G	N	G	R	G	G	A	N
S1A_555132664	A/C	1A	555132664	+	NA	NA	NA	NA	NA	NA	M	M	M	M	C	A	M	M	M	M	A	M	M	A	M	M	M	M	M	M	M	C	M	M	M	A	M	M	M	M	M	M	A	M	A	M	M	M	A
S1A_555132696	A/C	1A	555132696	+	NA	NA	NA	NA	NA	NA	M	M	M	M	C	A	M	M	M	M	A	M	M	A	M	M	M	M	M	M	M	C	M	M	M	A	M	M	M	M	M	M	A	M	A	M	M	M	A
S1A_555134508	A/C	1A	555134508	+	NA	NA	NA	NA	NA	NA	A	A	C	N	C	C	C	M	A	N	C	N	M	M	N	M	A	M	N	N	A	A	C	C	A	A	A	C	A	N	C	A	A	A	M	M	C	N	M
S1A_555134545	C/A	1A	555134545	+	NA	NA	NA	NA	NA	NA	C	C	A	N	A	A	A	M	C	N	A	N	M	M	N	M	C	M	N	N	C	C	A	A	C	C	C	A	C	N	A	C	C	C	M	M	A	N	M
S1A_555307890	C/T	1A	555307890	+	NA	NA	NA	NA	NA	NA	C	C	C	Y	C	C	Y	Y	C	C	Y	C	C	Y	C	Y	C	C	Y	Y	C	C	Y	Y	Y	Y	C	Y	Y	Y	C	Y	Y	C	Y	Y	Y	C	Y
S1A_555548254	G/A	1A	555548254	+	NA	NA	NA	NA	NA	NA	G	R	R	G	G	G	R	G	G	A	G	G	G	G	G	G	G	A	G	A	R	G	G	G	R	G	G	R	G	G	R	R	G	G	G	R	G	G	G
S1A_555647807	G/A	1A	555647807	+	NA	NA	NA	NA	NA	NA	R	R	G	R	G	R	G	R	R	G	R	G	G	R	R	G	R	G	G	G	G	R	R	G	R	R	G	R	R	G	R	G	R	R	R	R	G	R	R
S1A_556796471	T/G	1A	556796471	+	NA	NA	NA	NA	NA	NA	K	T	T	K	T	T	K	K	K	K	T	K	K	G	T	T	T	K	T	T	K	T	K	T	K	T	T	T	T	T	T	T	T	K	K	K	K	T	T
S1A_556796472	G/T	1A	556796472	+	NA	NA	NA	NA	NA	NA	K	G	G	K	G	G	K	K	K	K	G	K	K	T	G	G	G	K	G	G	K	G	K	G	K	G	G	G	G	G	G	G	G	K	K	K	K	G	G
S1A_556796476	C/T	1A	556796476	+	NA	NA	NA	NA	NA	NA	Y	C	C	Y	C	C	Y	Y	Y	Y	C	Y	Y	T	C	C	C	Y	C	C	Y	C	Y	C	Y	C	C	C	C	C	C	C	C	Y	Y	Y	Y	C	C
S1A_556818923	G/C	1A	556818923	+	NA	NA	NA	NA	NA	NA	S	S	S	S	S	S	G	S	G	G	S	S	G	G	S	S	G	S	S	S	S	S	G	G	S	S	G	G	S	S	S	S	S	S	G	S	G	S	S
S1A_556818924	T/C	1A	556818924	+	NA	NA	NA	NA	NA	NA	Y	Y	Y	Y	Y	Y	T	Y	T	T	Y	Y	T	T	Y	Y	Y	Y	Y	Y	Y	Y	T	T	Y	Y	T	T	Y	Y	Y	Y	Y	Y	T	Y	T	Y	Y
S1A_556829267	T/C	1A	556829267	+	NA	NA	NA	NA	NA	NA	C	T	T	T	T	C	T	C	T	T	T	T	T	T	T	T	T	T	T	T	C	T	T	T	T	T	T	T	T	T	T	T	T	T	T	T	T	T	T
S1A_557108968	G/C	1A	557108968	+	NA	NA	NA	NA	NA	NA	C	G	G	G	G	C	G	C	G	G	G	N	G	C	G	G	G	G	G	G	S	N	G	G	G	G	G	G	G	G	G	G	G	G	G	G	G	G	G
S1A_557295620	T/C	1A	557295620	+	NA	NA	NA	NA	NA	NA	T	Y	T	T	T	C	Y	N	T	T	T	T	T	T	Y	T	C	T	T	T	N	T	C	T	C	T	T	C	T	T	C	Y	T	C	T	Y	T	Y	T
S1A_557295935	C/T	1A	557295935	+	NA	NA	NA	NA	NA	NA	C	Y	C	C	C	T	Y	C	C	N	C	C	C	C	N	C	T	C	C	C	Y	C	T	C	T	C	C	T	C	C	T	C	C	T	Y	Y	C	T	C
S1A_557314695	A/G	1A	557314695	+	NA	NA	NA	NA	NA	NA	R	A	A	A	A	G	N	G	N	A	A	A	A	A	R	A	G	A	A	A	G	A	N	A	A	A	A	G	A	A	G	A	A	G	A	A	A	A	A
S1A_557977404	G/A	1A	557977404	+	NA	NA	NA	NA	NA	NA	G	R	G	G	G	A	R	G	G	G	G	G	G	G	G	G	A	G	G	G	G	G	A	G	R	G	G	A	G	G	A	R	G	A	G	G	G	R	G
S1A_558087111	G/A	1A	558087111	+	NA	NA	NA	NA	NA	NA	R	R	G	G	A	N	R	A	N	N	N	R	R	R	G	R	G	A	R	R	R	R	G	R	R	G	R	G	R	R	G	R	A	N	A	G	A	G	G
S1A_558087135	C/T	1A	558087135	+	NA	NA	NA	NA	NA	NA	Y	Y	C	C	T	N	Y	T	N	N	N	Y	Y	Y	C	Y	C	T	Y	Y	Y	Y	C	Y	Y	C	Y	C	Y	Y	C	Y	T	N	T	C	T	C	C
S1A_558087137	A/G	1A	558087137	+	NA	NA	NA	NA	NA	NA	R	R	A	A	G	N	R	G	N	N	N	R	R	R	A	R	A	G	R	R	R	R	A	R	R	A	R	A	R	R	A	R	G	N	G	A	G	A	A
S1A_558087139	T/C	1A	558087139	+	NA	NA	NA	NA	NA	NA	Y	Y	T	T	C	N	Y	C	N	N	N	Y	Y	Y	T	Y	T	C	Y	Y	Y	Y	T	Y	Y	T	Y	T	Y	Y	T	Y	C	N	C	T	C	T	T
S1A_558266086	C/T	1A	558266086	+	NA	NA	NA	NA	NA	NA	C	Y	T	Y	C	C	C	C	C	C	C	C	C	C	C	C	T	C	T	Y	Y	C	C	Y	C	Y	C	C	Y	T	C	C	C	C	C	C	C	C	Y
S1A_558266096	G/A	1A	558266096	+	NA	NA	NA	NA	NA	NA	G	R	G	R	R	G	R	R	R	G	A	G	G	R	G	G	G	G	G	G	G	R	G	R	G	G	G	R	R	G	G	R	R	G	G	G	G	G	R
S1A_558266122	A/G	1A	558266122	+	NA	NA	NA	NA	NA	NA	R	R	G	R	A	A	R	R	A	A	A	A	A	A	A	A	G	A	G	R	R	A	A	R	A	R	A	R	R	G	A	A	A	G	R	A	A	A	R
S1A_558316677	C/G	1A	558316677	+	NA	NA	NA	NA	NA	NA	C	S	C	G	C	G	G	C	C	C	C	C	C	C	S	C	G	C	C	C	G	C	G	C	S	C	C	G	C	C	G	S	C	G	C	S	C	N	C
S1A_558487462	T/C	1A	558487462	+	NA	NA	NA	NA	NA	NA	T	T	N	C	T	N	Y	T	T	T	T	T	T	T	N	T	N	T	N	T	Y	T	C	T	Y	T	T	C	T	T	C	Y	N	C	N	Y	N	N	T
S1A_558487471	A/C	1A	558487471	+	NA	NA	NA	NA	NA	NA	A	A	N	C	A	N	M	A	A	A	A	A	A	A	N	A	N	A	N	A	M	A	C	A	M	A	A	C	A	A	C	M	N	C	N	M	N	N	A
S1A_558541135	G/A	1A	558541135	+	NA	NA	NA	NA	NA	NA	G	A	G	A	G	A	R	G	G	G	G	G	G	G	A	G	A	G	G	G	G	G	A	G	R	G	G	A	G	G	A	R	G	A	G	R	G	R	G
S1A_558976304	G/C	1A	558976304	+	NA	NA	NA	NA	NA	NA	S	G	G	S	G	G	S	S	S	S	G	G	S	S	G	G	S	S	S	G	G	G	S	S	S	S	G	G	G	G	G	G	G	G	S	S	G	C	G
S1A_558976312	T/C	1A	558976312	+	NA	NA	NA	NA	NA	NA	Y	T	T	Y	T	T	Y	Y	Y	Y	T	T	Y	Y	T	T	Y	Y	Y	T	T	T	Y	Y	Y	Y	T	T	T	T	T	T	T	T	Y	Y	T	C	T
S1A_559780854	G/A	1A	559780854	+	NA	NA	NA	NA	NA	NA	G	G	G	A	G	A	G	G	G	G	G	G	G	G	R	G	A	G	G	G	G	G	A	G	R	G	G	A	G	G	A	G	G	A	G	G	G	G	G
S1A_560437999	A/G	1A	560437999	+	NA	NA	NA	NA	NA	NA	A	A	A	G	G	G	A	A	A	A	A	A	A	A	R	A	G	R	A	A	G	G	G	N	R	A	A	G	N	A	N	A	A	G	A	A	A	R	A
S1A_560895871	C/A	1A	560895871	+	NA	NA	NA	NA	NA	NA	C	C	C	C	C	C	C	C	C	C	C	M	C	C	M	C	C	C	C	C	C	C	C	C	C	C	C	M	M	C	M	C	C	C	C	C	C	C	C
S1A_560895919	G/A	1A	560895919	+	NA	NA	NA	NA	NA	NA	G	G	G	R	G	R	G	R	R	G	R	R	G	G	G	G	R	G	G	G	G	G	R	R	R	G	G	G	R	G	G	G	R	G	R	G	G	G	G
S1A_560895921	T/G	1A	560895921	+	NA	NA	NA	NA	NA	NA	T	T	T	T	T	T	T	T	T	T	T	K	T	T	K	T	T	T	T	T	T	T	T	T	T	T	T	K	K	T	K	T	T	T	T	T	T	T	T
S1A_560895924	A/G	1A	560895924	+	NA	NA	NA	NA	NA	NA	A	A	A	A	A	A	A	A	A	A	A	R	A	A	R	A	A	A	A	A	A	A	A	A	A	A	A	R	R	A	R	A	A	A	A	A	A	A	A
S1A_561059920	T/G	1A	561059920	+	NA	NA	NA	NA	NA	NA	T	T	T	N	K	K	T	T	T	K	K	T	K	N	T	T	T	T	T	T	T	T	K	K	K	N	T	T	T	T	T	T	T	T	T	T	T	T	K
S1A_561487937	G/C	1A	561487937	+	NA	NA	NA	NA	NA	NA	G	G	G	G	G	G	G	G	S	G	G	G	G	G	G	G	G	S	G	G	G	G	S	G	G	G	G	G	G	G	G	G	G	G	G	G	G	S	G
S1A_562005895	G/A	1A	562005895	+	NA	NA	NA	NA	NA	NA	G	A	R	G	N	G	G	G	R	A	R	R	R	R	N	R	G	R	R	R	R	G	R	G	R	G	R	G	A	G	G	R	R	G	N	G	G	G	A
S1A_563292438	T/C	1A	563292438	+	NA	NA	NA	NA	NA	NA	T	T	T	C	T	T	T	T	T	N	Y	T	T	N	Y	T	Y	T	T	T	C	T	C	Y	Y	T	T	T	T	T	T	T	N	T	T	T	Y	C	T
S1A_563292472	G/A	1A	563292472	+	NA	NA	NA	NA	NA	NA	G	G	G	A	G	G	G	G	G	N	R	G	G	N	G	G	R	G	G	G	R	G	R	G	G	G	G	G	G	G	G	G	N	G	G	G	G	R	G
S1A_563319769	A/T	1A	563319769	+	NA	NA	NA	NA	NA	NA	A	A	A	T	A	N	A	A	A	N	T	A	A	N	A	A	W	A	A	A	T	A	T	T	W	N	A	A	N	A	A	A	N	N	A	A	A	W	A
S1A_563338037	C/T	1A	563338037	+	NA	NA	NA	NA	NA	NA	C	C	C	C	C	C	C	C	C	C	C	T	T	C	C	C	C	C	C	C	C	C	C	C	Y	C	C	C	C	C	C	C	C	C	C	C	C	T	C
S1A_563774088	G/A	1A	563774088	+	NA	NA	NA	NA	NA	NA	G	R	G	G	G	G	R	G	G	G	G	G	G	G	G	G	G	G	G	G	G	G	G	G	G	G	G	N	G	G	G	R	G	G	G	R	A	G	G
S1A_563774089	A/G	1A	563774089	+	NA	NA	NA	NA	NA	NA	A	A	A	A	A	A	A	A	A	A	R	R	A	A	A	R	A	A	A	R	A	A	A	R	A	A	A	N	A	R	A	A	A	A	A	A	A	A	A
S1A_564095501	C/T	1A	564095501	+	NA	NA	NA	NA	NA	NA	Y	C	C	C	C	C	C	C	C	C	Y	C	C	C	N	C	C	C	C	C	C	C	N	Y	C	C	C	C	C	Y	C	C	C	C	C	C	C	C	C
S1A_564095552	G/A	1A	564095552	+	NA	NA	NA	NA	NA	NA	R	G	G	G	G	G	G	N	G	G	A	G	G	G	G	G	G	G	G	R	N	G	G	R	G	G	G	N	G	R	G	G	G	G	G	G	G	N	R
S1A_564095575	T/A	1A	564095575	+	NA	NA	NA	NA	NA	NA	W	T	T	T	T	T	T	N	T	T	A	T	T	T	T	T	T	T	T	W	N	T	T	W	T	T	T	N	T	W	T	T	T	T	T	T	T	N	W
S1A_564095580	T/C	1A	564095580	+	NA	NA	NA	NA	NA	NA	Y	T	T	T	T	T	T	N	T	T	C	T	T	T	T	T	T	T	T	Y	N	T	T	Y	T	T	T	N	T	Y	T	T	T	T	T	T	T	N	Y
S1A_564116941	T/C	1A	564116941	+	NA	NA	NA	NA	NA	NA	T	Y	N	T	Y	N	T	T	T	T	T	T	C	C	N	C	N	T	Y	C	Y	Y	Y	T	N	Y	N	T	N	Y	N	T	Y	Y	T	N	T	N	Y
S1A_564116947	C/G	1A	564116947	+	NA	NA	NA	NA	NA	NA	C	S	N	C	S	N	C	C	C	C	C	C	G	G	N	G	N	C	S	G	S	S	S	C	N	S	N	C	N	S	N	C	S	S	C	N	C	N	S
S1A_564116998	C/T	1A	564116998	+	NA	NA	NA	NA	NA	NA	C	Y	N	C	Y	N	C	C	C	C	C	C	T	T	N	T	N	C	Y	T	Y	Y	Y	C	N	Y	N	C	N	Y	N	C	Y	Y	C	N	C	N	Y
S1A_564125293	T/C	1A	564125293	+	NA	NA	NA	NA	NA	NA	T	Y	T	T	T	T	Y	C	T	T	N	C	C	T	T	T	C	C	T	T	T	T	C	T	C	T	T	C	T	T	C	Y	T	C	Y	C	T	C	T
S1A_564453899	T/C	1A	564453899	+	NA	NA	NA	NA	NA	NA	N	T	Y	N	T	N	T	C	T	Y	Y	Y	Y	N	Y	T	Y	C	Y	T	T	T	Y	T	C	Y	T	T	Y	T	T	T	Y	T	C	T	T	T	T
S1A_564453900	A/T	1A	564453900	+	NA	NA	NA	NA	NA	NA	N	A	W	N	A	N	A	T	A	W	W	W	W	N	W	A	W	T	W	A	A	A	W	A	T	T	A	A	W	A	A	T	W	T	T	T	T	A	T
S1A_564453938	G/A	1A	564453938	+	NA	NA	NA	NA	NA	NA	N	G	R	N	G	N	G	A	G	R	R	R	R	N	R	G	R	A	R	G	G	G	R	G	A	R	G	G	R	G	G	G	R	G	A	G	G	G	G
S1A_564585359	G/T	1A	564585359	+	NA	NA	NA	NA	NA	NA	N	G	G	G	G	T	G	T	G	G	T	G	G	N	G	G	G	N	G	G	G	N	G	G	G	N	G	G	T	G	G	G	N	G	G	G	G	G	G
S1A_564759657	G/C	1A	564759657	+	NA	NA	NA	NA	NA	NA	G	S	S	G	N	G	G	N	G	C	C	N	S	C	G	S	G	N	S	S	G	G	S	G	G	G	C	G	C	S	G	S	C	G	G	G	G	N	G
S1A_564759659	A/G	1A	564759659	+	NA	NA	NA	NA	NA	NA	A	R	R	A	N	A	A	N	A	G	G	N	R	G	A	R	A	N	R	R	A	A	R	A	A	A	G	A	G	R	A	R	G	A	A	A	A	N	A
S1A_564759660	T/C	1A	564759660	+	NA	NA	NA	NA	NA	NA	T	Y	Y	T	N	T	T	N	T	C	C	N	Y	C	T	Y	T	N	Y	Y	T	T	Y	T	T	T	C	T	C	Y	T	Y	C	T	T	T	T	N	T
S1A_564759668	T/C	1A	564759668	+	NA	NA	NA	NA	NA	NA	T	Y	Y	T	N	T	T	N	T	C	C	N	Y	C	T	Y	T	N	Y	Y	T	T	Y	T	T	T	C	T	C	Y	T	Y	C	T	T	T	T	N	T
S1A_565121462	A/G	1A	565121462	+	NA	NA	NA	NA	NA	NA	G	A	A	G	A	G	A	G	G	G	G	G	G	G	R	A	A	G	A	A	G	A	A	A	A	G	A	A	G	A	A	A	G	A	A	A	A	A	A
S1A_565198894	G/T	1A	565198894	+	NA	NA	NA	NA	NA	NA	N	T	G	G	G	T	T	T	G	G	T	G	G	T	T	G	T	T	G	G	G	N	T	G	T	T	G	T	T	G	T	T	T	T	T	T	T	T	G
S1A_565294642	G/T	1A	565294642	+	NA	NA	NA	NA	NA	NA	G	K	G	G	G	G	K	G	G	G	G	G	G	G	T	G	T	G	G	G	G	G	T	G	K	G	G	T	G	G	T	G	G	T	G	K	G	K	G
S1A_565294670	A/C	1A	565294670	+	NA	NA	NA	NA	NA	NA	A	C	A	A	A	C	C	C	A	A	C	A	A	C	C	A	C	C	A	A	A	A	C	A	M	C	A	C	C	A	C	C	C	C	C	C	C	M	A
S1A_565296733	C/G	1A	565296733	+	NA	NA	NA	NA	NA	NA	C	C	C	S	C	C	N	C	S	C	C	G	S	C	C	C	C	C	C	C	S	C	C	C	S	C	C	N	C	C	C	C	C	C	C	C	C	S	C
S1A_565296785	G/A	1A	565296785	+	NA	NA	NA	NA	NA	NA	R	G	R	R	R	A	N	R	R	R	R	A	R	R	G	R	R	G	R	R	R	R	R	A	R	R	A	N	G	R	R	G	G	G	G	R	A	R	R
S1A_565519207	A/C	1A	565519207	+	NA	NA	NA	NA	NA	NA	M	A	A	C	A	A	A	A	C	C	A	C	C	A	M	A	A	A	A	A	A	N	A	A	M	A	A	A	A	A	A	A	A	A	A	A	A	C	A
S1A_566064814	G/A	1A	566064814	+	NA	NA	NA	NA	NA	NA	G	G	N	A	G	N	G	G	A	N	N	A	A	G	A	G	G	G	G	G	A	G	G	G	G	G	G	G	G	G	G	G	G	G	G	G	G	R	G
S1A_566239861	C/G	1A	566239861	+	NA	NA	NA	NA	NA	NA	S	S	C	G	C	C	S	C	G	G	C	G	G	C	S	C	C	C	C	C	G	N	C	C	G	C	C	C	C	C	C	S	C	C	C	S	G	S	C
S1A_566239862	G/A	1A	566239862	+	NA	NA	NA	NA	NA	NA	R	R	G	A	G	G	R	G	A	A	G	A	A	G	R	G	G	G	G	G	A	N	G	G	A	G	G	G	G	G	G	R	G	G	G	R	A	R	G
S1A_566239863	A/G	1A	566239863	+	NA	NA	NA	NA	NA	NA	R	R	A	G	A	A	R	A	G	G	A	G	G	A	R	A	A	A	A	A	G	N	A	A	G	A	A	A	A	A	A	R	A	A	A	R	G	R	A
S1A_566305467	G/A	1A	566305467	+	NA	NA	NA	NA	NA	NA	G	G	G	R	R	G	G	G	G	G	G	G	G	G	G	N	G	N	G	G	G	G	G	G	G	G	G	G	G	G	G	G	G	R	G	G	G	N	G
S1A_566319187	G/A	1A	566319187	+	NA	NA	NA	NA	NA	NA	G	G	R	G	N	G	G	N	G	G	G	G	G	G	N	R	G	G	G	R	G	G	G	N	N	G	G	G	G	R	N	G	G	G	G	G	G	G	N
S1A_566319235	G/A	1A	566319235	+	NA	NA	NA	NA	NA	NA	N	G	R	R	N	G	G	G	R	G	G	G	R	N	G	R	G	G	R	R	G	N	G	G	R	R	G	G	G	G	G	A	G	G	G	G	R	G	G
S1A_566319240	C/T	1A	566319240	+	NA	NA	NA	NA	NA	NA	N	T	C	C	N	C	Y	C	C	C	C	C	C	N	Y	C	T	C	C	C	Y	N	T	C	Y	C	C	T	C	C	T	C	C	T	Y	Y	C	Y	C
S1A_566319253	A/G	1A	566319253	+	NA	NA	NA	NA	NA	NA	N	A	R	R	N	A	A	A	R	A	A	A	R	N	A	R	A	A	R	R	A	N	A	A	R	R	A	A	A	A	A	G	A	A	A	A	R	A	A
S1A_566369443	T/C	1A	566369443	+	NA	NA	NA	NA	NA	NA	T	T	T	T	T	T	T	T	T	T	C	T	T	C	T	T	T	Y	T	T	T	T	T	T	T	C	T	T	C	T	T	T	C	T	Y	T	T	T	T
S1A_566378186	G/A	1A	566378186	+	NA	NA	NA	NA	NA	NA	G	G	G	G	G	G	G	N	N	G	A	G	G	A	G	G	G	N	G	G	G	G	G	G	G	A	G	G	A	G	G	G	A	G	A	G	G	G	G
S1A_566590619	G/T	1A	566590619	+	NA	NA	NA	NA	NA	NA	K	G	G	G	G	T	G	G	T	T	T	G	G	T	G	G	G	K	G	G	T	G	G	G	G	T	G	G	T	G	G	G	T	G	K	G	G	G	G
S1A_566625886	G/A	1A	566625886	+	NA	NA	NA	NA	NA	NA	G	R	G	G	G	G	R	G	G	N	N	G	G	N	A	G	A	G	G	G	G	G	N	G	R	N	G	A	N	G	A	R	N	A	R	R	G	R	G
S1A_566690220	C/A	1A	566690220	+	NA	NA	NA	NA	NA	NA	A	M	C	C	A	C	M	C	N	N	C	C	C	C	A	C	A	C	C	C	M	A	A	A	N	C	C	A	C	C	A	M	C	A	M	M	C	M	A
S1A_566690230	C/T	1A	566690230	+	NA	NA	NA	NA	NA	NA	T	Y	C	C	T	C	Y	C	N	N	C	C	C	C	T	C	T	C	C	C	Y	T	T	T	N	C	C	T	C	C	T	Y	C	T	Y	Y	C	Y	T
S1A_567598606	T/C	1A	567598606	+	NA	NA	NA	NA	NA	NA	Y	Y	Y	T	Y	N	Y	Y	C	Y	Y	T	C	T	C	Y	T	Y	Y	Y	T	C	Y	Y	T	Y	C	Y	T	Y	Y	Y	T	T	Y	Y	N	C	Y
S1A_567987959	A/G	1A	567987959	+	NA	NA	NA	NA	NA	NA	A	A	A	A	A	N	A	A	G	N	G	A	A	G	G	A	A	N	A	A	A	A	A	A	A	G	A	A	G	N	A	A	G	A	G	A	A	A	N
S1A_568013220	C/T	1A	568013220	+	NA	NA	NA	NA	NA	NA	C	T	C	T	C	C	C	T	C	C	C	C	T	C	Y	C	T	Y	C	C	C	C	T	C	T	C	C	T	C	C	T	Y	C	T	C	Y	C	T	C
S1A_568381115	G/C	1A	568381115	+	NA	NA	NA	NA	NA	NA	G	G	G	C	G	C	G	C	G	G	G	G	C	C	G	G	G	C	G	G	G	G	G	G	G	G	G	G	G	G	G	G	G	G	S	G	G	S	G
S1A_568459119	G/C	1A	568459119	+	NA	NA	NA	NA	NA	NA	G	S	G	G	G	G	S	G	C	C	G	G	C	G	N	G	C	G	G	G	G	G	C	N	C	G	N	C	G	G	C	G	N	C	G	S	G	C	G
S1A_568496498	C/T	1A	568496498	+	NA	NA	NA	NA	NA	NA	C	T	C	C	C	C	T	C	T	T	C	N	T	C	T	C	T	C	C	C	N	C	T	C	T	C	C	T	C	C	T	T	C	T	Y	Y	N	T	N
S1A_568650731	A/G	1A	568650731	+	NA	NA	NA	NA	NA	NA	A	R	A	N	A	G	R	G	G	G	A	A	G	G	G	A	N	G	A	A	G	A	G	A	N	A	A	G	A	A	G	A	A	G	A	A	A	N	A
S1A_569132567	G/T	1A	569132567	+	NA	NA	NA	NA	NA	NA	G	G	G	G	G	G	G	G	K	K	G	G	G	G	G	G	G	K	G	G	G	G	K	G	K	G	K	G	G	G	G	G	G	G	G	G	G	G	G
S1A_569132569	G/T	1A	569132569	+	NA	NA	NA	NA	NA	NA	K	G	G	G	G	G	K	G	K	K	G	G	G	G	G	G	G	K	K	G	K	G	K	G	K	G	K	K	G	G	K	K	G	G	G	K	G	G	G
S1A_569306153	G/A	1A	569306153	+	NA	NA	NA	NA	NA	NA	G	G	G	G	G	G	G	G	N	G	G	G	G	G	R	N	R	N	G	G	G	G	G	N	N	G	G	G	G	N	G	G	G	G	G	G	G	G	G
S1A_569306173	G/A	1A	569306173	+	NA	NA	NA	NA	NA	NA	G	G	A	G	R	G	R	G	N	G	G	G	G	G	G	N	G	N	A	A	G	G	G	N	N	A	A	G	A	N	G	G	A	G	G	G	R	G	R
S1A_569446986	T/C	1A	569446986	+	NA	NA	NA	NA	NA	NA	Y	Y	Y	T	Y	T	Y	T	T	T	Y	Y	Y	Y	Y	Y	Y	Y	Y	Y	Y	Y	Y	Y	Y	Y	Y	Y	Y	Y	C	Y	Y	Y	Y	Y	Y	Y	Y
S1A_570108584	C/T	1A	570108584	+	NA	NA	NA	NA	NA	NA	C	C	C	C	C	C	C	T	T	T	C	C	C	C	C	C	C	C	C	C	C	C	C	N	C	C	C	C	C	C	C	C	C	C	C	C	C	C	C
S1A_570134050	G/A	1A	570134050	+	NA	NA	NA	NA	NA	NA	R	R	A	G	A	G	R	G	G	G	A	A	G	G	G	A	G	G	A	A	G	A	G	A	G	A	A	G	A	A	G	R	A	G	N	R	A	G	A
S1A_570134061	A/G	1A	570134061	+	NA	NA	NA	NA	NA	NA	R	A	A	G	A	G	A	G	G	G	A	A	G	A	A	A	A	G	A	A	A	A	A	A	A	A	A	A	A	A	A	A	A	A	N	A	A	A	A
S1A_570134066	G/A	1A	570134066	+	NA	NA	NA	NA	NA	NA	R	G	G	A	G	A	G	A	A	A	G	G	A	G	G	G	G	A	G	G	G	G	G	G	G	G	G	G	G	G	G	G	G	G	N	G	G	G	G
S1A_570423549	C/G	1A	570423549	+	NA	NA	NA	NA	NA	NA	G	S	C	N	G	G	S	C	C	N	C	C	C	G	N	C	G	C	N	N	G	G	G	G	S	G	N	G	C	C	G	S	C	G	C	S	C	S	G
S1A_570615890	T/C	1A	570615890	+	NA	NA	NA	NA	NA	NA	Y	Y	T	N	N	C	T	T	T	T	T	T	T	C	C	T	C	T	T	T	N	C	C	C	Y	C	T	C	T	T	C	C	T	C	N	Y	T	Y	C
S1A_570653082	C/T	1A	570653082	+	NA	NA	NA	NA	NA	NA	C	N	C	C	C	Y	C	Y	C	C	C	C	Y	C	C	C	C	C	C	C	N	C	N	Y	C	N	Y	C	Y	Y	C	C	N	C	Y	C	C	C	T
S1A_571959768	G/T	1A	571959768	+	NA	NA	NA	NA	NA	NA	G	K	G	G	G	G	T	G	G	G	G	G	G	G	N	G	T	G	G	G	K	G	T	G	K	G	G	T	G	G	T	G	G	T	G	N	G	K	G
S1A_571959769	C/G	1A	571959769	+	NA	NA	NA	NA	NA	NA	C	S	C	C	C	C	G	C	C	C	C	C	C	C	N	C	G	C	C	C	S	C	G	C	S	C	C	G	C	C	G	C	C	G	C	N	C	S	C
S1A_571959822	T/C	1A	571959822	+	NA	NA	NA	NA	NA	NA	T	Y	T	T	T	T	C	T	C	C	T	T	T	T	N	T	C	T	T	T	C	T	C	T	Y	T	T	C	T	T	C	T	T	C	T	N	T	Y	T
S1A_572072836	A/G	1A	572072836	+	NA	NA	NA	NA	NA	NA	R	G	A	A	A	A	R	G	G	G	A	A	A	A	G	A	G	R	A	A	G	A	G	A	G	A	N	G	A	A	G	R	A	G	A	R	A	R	A
S1A_572156296	T/C	1A	572156296	+	NA	NA	NA	NA	NA	NA	T	C	T	T	T	T	T	C	N	C	T	T	T	N	Y	T	C	Y	T	T	C	N	C	T	C	T	T	C	T	T	C	T	T	C	T	Y	T	Y	T
S1A_572747081	A/T	1A	572747081	+	NA	NA	NA	NA	NA	NA	A	A	A	A	A	A	A	N	T	T	T	A	A	N	A	N	A	N	A	A	T	A	A	A	A	A	A	A	T	A	A	A	T	A	T	A	A	N	A
S1A_572892757	T/G	1A	572892757	+	NA	NA	NA	NA	NA	NA	T	T	T	G	T	T	T	T	T	T	T	N	T	T	T	T	T	T	T	T	T	T	G	T	K	T	T	T	N	T	T	T	T	T	T	N	T	K	T
S1A_573206516	A/G	1A	573206516	+	NA	NA	NA	NA	NA	NA	R	A	R	A	R	A	R	R	R	R	R	R	R	A	R	R	A	A	R	R	A	R	A	R	A	A	R	R	A	R	R	R	A	A	A	A	A	A	A
S1A_573206530	A/C	1A	573206530	+	NA	NA	NA	NA	NA	NA	M	A	M	A	M	A	M	M	M	M	M	M	M	A	M	M	A	A	M	M	A	M	A	M	A	A	M	M	A	M	M	M	A	A	A	A	A	A	A
S1A_573243670	G/A	1A	573243670	+	NA	NA	NA	NA	NA	NA	G	R	R	G	G	G	G	G	G	G	G	G	G	G	G	R	G	G	G	G	A	G	G	G	G	G	G	R	G	G	R	R	G	G	R	R	G	G	G
S1A_573393002	T/C	1A	573393002	+	NA	NA	NA	NA	NA	NA	Y	T	T	C	T	T	T	C	T	T	T	T	T	T	Y	T	T	Y	T	N	T	T	C	T	Y	T	T	T	T	T	T	T	T	T	T	T	T	Y	T
S1A_573393024	G/A	1A	573393024	+	NA	NA	NA	NA	NA	NA	G	G	G	G	G	G	G	G	A	A	A	G	G	G	G	G	G	G	G	N	G	G	G	G	G	G	G	G	A	G	G	G	A	G	A	G	G	G	G
S1A_573393087	T/C	1A	573393087	+	NA	NA	NA	NA	NA	NA	T	T	T	C	T	T	T	C	C	C	C	T	T	T	T	T	T	C	T	T	T	T	C	T	Y	T	T	T	C	T	T	T	C	T	Y	T	T	T	T
S1A_573638139	T/C	1A	573638139	+	NA	NA	NA	NA	NA	NA	T	T	T	N	T	N	T	N	C	C	C	T	T	T	T	Y	T	N	T	T	Y	T	N	T	T	Y	T	T	C	T	T	T	C	T	Y	T	T	N	T
S1A_573638140	G/T	1A	573638140	+	NA	NA	NA	NA	NA	NA	G	G	G	N	G	N	G	N	T	T	T	G	G	G	G	K	G	N	G	G	K	G	N	G	G	K	G	G	T	G	G	G	T	G	K	G	G	N	G
S1A_573638141	A/G	1A	573638141	+	NA	NA	NA	NA	NA	NA	A	A	A	N	A	N	A	N	G	G	G	A	A	A	A	R	A	N	A	A	R	A	N	A	A	R	A	A	G	A	A	A	G	A	R	A	A	N	A
S1A_573920817	G/T	1A	573920817	+	NA	NA	NA	NA	NA	NA	G	G	G	T	G	G	G	T	G	G	G	G	G	G	G	G	G	K	G	G	T	G	T	G	G	G	G	G	G	G	G	G	G	G	G	G	G	K	G
S1A_574080446	C/T	1A	574080446	+	NA	NA	NA	NA	NA	NA	C	C	C	C	Y	C	C	C	C	N	C	C	N	C	C	C	C	N	C	C	T	N	N	C	N	Y	N	N	C	C	N	C	C	C	C	Y	C	C	C
S1A_574080452	G/A	1A	574080452	+	NA	NA	NA	NA	NA	NA	A	G	G	A	R	G	R	G	G	N	R	R	N	G	R	G	R	N	R	G	G	N	N	G	N	R	N	N	R	G	N	G	A	G	R	R	R	G	R
S1A_574080480	G/A	1A	574080480	+	NA	NA	NA	NA	NA	NA	A	G	G	A	R	G	R	G	G	N	R	R	N	G	R	G	R	N	R	G	G	N	N	G	N	R	N	N	R	G	N	G	A	G	R	R	R	G	R
S1A_574080485	T/C	1A	574080485	+	NA	NA	NA	NA	NA	NA	T	T	T	T	Y	T	T	T	T	N	T	T	N	T	T	T	T	N	T	T	C	N	N	T	N	Y	N	N	T	T	N	T	T	T	T	Y	T	T	T
S1A_574215295	G/A	1A	574215295	+	NA	NA	NA	NA	NA	NA	N	G	G	A	G	G	G	G	G	G	N	N	G	G	N	N	N	N	G	G	A	G	A	G	A	G	G	G	G	G	G	G	G	G	G	N	G	A	N
S1A_574233703	A/G	1A	574233703	+	NA	NA	NA	NA	NA	NA	A	A	A	N	A	A	A	A	G	G	G	A	A	A	A	A	A	A	A	A	N	A	N	N	N	A	N	A	G	A	A	A	G	A	G	A	A	A	A
S1A_574474219	C/T	1A	574474219	+	NA	NA	NA	NA	NA	NA	C	C	C	C	C	C	C	C	N	C	C	C	T	C	C	C	C	C	C	C	C	C	N	C	Y	C	C	C	C	C	C	C	C	C	C	C	C	Y	C
S1A_574479447	G/A	1A	574479447	+	NA	NA	NA	NA	NA	NA	R	G	G	G	G	G	R	G	G	G	N	R	A	A	G	G	R	R	G	G	R	G	A	A	R	R	G	G	N	G	R	G	N	R	A	R	R	R	R
S1A_574479453	A/G	1A	574479453	+	NA	NA	NA	NA	NA	NA	R	A	A	A	A	A	R	A	A	A	N	R	G	G	A	A	R	R	A	A	R	A	G	G	R	R	A	A	N	A	R	A	N	R	G	R	R	R	R
S1A_574691476	G/A	1A	574691476	+	NA	NA	NA	NA	NA	NA	G	R	R	R	N	G	G	G	G	A	G	G	N	G	G	R	N	G	G	G	G	G	G	G	R	N	G	N	A	G	R	G	N	G	G	G	G	N	N
S1A_574691501	A/T	1A	574691501	+	NA	NA	NA	NA	NA	NA	A	W	W	W	N	A	A	A	A	T	A	A	N	A	A	W	N	A	A	A	A	A	A	A	W	N	A	N	T	A	W	A	N	A	A	A	A	N	N
S1A_574845603	C/G	1A	574845603	+	NA	NA	NA	NA	NA	NA	C	C	C	C	C	C	C	C	G	G	C	N	C	C	C	C	C	C	C	C	S	C	C	C	C	C	C	C	C	C	C	C	C	C	C	C	C	C	C
S1A_575179643	T/C	1A	575179643	+	NA	NA	NA	NA	NA	NA	Y	T	T	T	N	T	T	C	T	T	T	T	T	T	T	T	T	Y	T	T	T	N	C	T	Y	N	T	T	T	T	T	T	T	T	T	T	T	T	T
S1A_575245793	A/G	1A	575245793	+	NA	NA	NA	NA	NA	NA	A	A	N	A	A	A	N	A	N	A	A	A	R	A	N	A	A	A	A	N	A	A	N	A	G	A	N	N	A	A	A	A	A	A	A	A	A	G	A
S1A_575245801	G/T	1A	575245801	+	NA	NA	NA	NA	NA	NA	G	G	N	G	G	G	N	G	N	G	G	G	K	G	N	G	G	G	G	N	G	G	N	G	T	G	N	N	G	G	G	G	G	G	G	G	G	T	G
S1A_575245802	A/G	1A	575245802	+	NA	NA	NA	NA	NA	NA	A	A	N	A	A	A	N	A	N	A	A	A	R	A	N	A	A	A	A	N	A	A	N	A	G	A	N	N	A	A	A	A	A	A	A	A	A	G	A
S1A_575245803	A/G	1A	575245803	+	NA	NA	NA	NA	NA	NA	A	A	N	A	A	A	N	A	N	A	A	A	R	A	N	A	A	A	A	N	A	A	N	A	G	A	N	N	A	A	A	A	A	A	A	A	A	G	A
S1A_575597761	G/A	1A	575597761	+	NA	NA	NA	NA	NA	NA	R	G	G	G	G	G	G	A	G	G	G	G	G	G	G	G	G	G	G	G	G	G	A	G	A	G	G	G	G	G	G	G	G	G	G	G	G	R	G
S1A_575693239	G/T	1A	575693239	+	NA	NA	NA	NA	NA	NA	G	G	G	G	G	G	G	T	G	G	G	G	G	G	G	G	G	K	G	G	G	G	T	G	K	G	G	G	G	G	G	G	G	G	G	G	G	K	G
S1A_575967177	G/A	1A	575967177	+	NA	NA	NA	NA	NA	NA	G	G	G	G	G	G	G	R	R	R	G	G	G	G	R	R	G	R	R	G	G	G	G	G	G	G	G	G	G	G	G	G	G	G	G	G	G	G	G
S1A_576898024	C/T	1A	576898024	+	NA	NA	NA	NA	NA	NA	C	C	C	C	C	C	C	C	C	C	T	C	C	C	C	C	C	C	C	C	C	C	C	C	C	C	C	C	T	C	C	C	N	T	Y	C	C	C	C
S1A_577508665	A/G	1A	577508665	+	NA	NA	NA	NA	NA	NA	A	A	G	A	A	A	A	A	A	A	A	G	A	G	A	G	A	R	G	G	G	A	A	A	A	A	G	G	A	G	G	G	A	R	R	G	G	A	A
S1A_577867642	A/G	1A	577867642	+	NA	NA	NA	NA	NA	NA	A	A	R	A	A	A	A	A	A	A	R	R	A	R	A	R	R	A	R	R	R	A	A	A	A	A	R	R	R	R	R	R	R	R	R	R	R	A	A
S1A_577986690	A/G	1A	577986690	+	NA	NA	NA	NA	NA	NA	A	A	A	A	N	A	A	A	A	A	N	A	G	A	A	N	A	A	N	A	A	G	A	G	N	G	A	A	A	A	A	A	N	A	A	A	A	N	G
S1A_578015317	C/G	1A	578015317	+	NA	NA	NA	NA	NA	NA	C	S	G	C	N	N	C	C	C	N	G	G	C	G	N	G	G	C	G	G	G	C	C	C	C	C	G	G	N	G	G	S	N	S	G	S	G	C	C
S1A_578071978	G/A	1A	578071978	+	NA	NA	NA	NA	NA	NA	G	G	R	N	G	G	G	G	N	G	R	G	G	G	G	G	G	G	A	G	G	R	G	G	G	G	A	N	R	G	G	G	G	G	R	G	G	G	R
S1A_578072004	G/A	1A	578072004	+	NA	NA	NA	NA	NA	NA	G	G	R	N	G	G	G	G	N	G	R	G	G	G	G	G	G	G	A	G	G	R	G	G	G	G	A	N	R	G	G	G	G	G	R	G	G	G	R
S1A_578208223	G/C	1A	578208223	+	NA	NA	NA	NA	NA	NA	G	G	C	G	G	G	S	G	N	G	C	C	G	C	G	N	N	G	C	C	C	G	G	G	N	G	C	C	C	C	C	S	C	G	C	S	C	G	G
S1A_578299663	C/T	1A	578299663	+	NA	NA	NA	NA	NA	NA	Y	C	C	C	T	C	C	C	C	C	C	C	C	C	C	C	C	C	C	C	C	T	C	T	C	T	C	N	C	C	C	C	C	C	C	C	C	C	T
S1A_578299695	A/C	1A	578299695	+	NA	NA	NA	NA	NA	NA	M	M	C	A	C	A	M	A	A	A	C	C	A	C	A	C	C	A	C	C	C	C	A	C	A	C	C	N	C	C	C	M	C	A	C	M	C	A	C
S1A_578328708	C/T	1A	578328708	+	NA	NA	NA	NA	NA	NA	C	Y	Y	C	C	C	C	Y	Y	Y	C	C	C	C	Y	C	C	Y	C	C	Y	C	C	C	Y	C	C	C	C	C	Y	Y	C	C	Y	Y	C	C	C
S1A_578785369	T/C	1A	578785369	+	NA	NA	NA	NA	NA	NA	Y	Y	C	T	C	T	T	T	T	T	C	C	T	C	T	C	C	T	C	C	Y	C	T	C	T	C	C	C	C	C	C	Y	C	T	C	Y	C	T	C
S1A_578919893	G/A	1A	578919893	+	NA	NA	NA	NA	NA	NA	G	G	G	G	G	G	G	G	R	N	G	G	G	G	N	R	G	G	N	G	G	G	G	N	G	G	R	G	G	N	G	N	G	G	G	G	G	G	G
S1A_578933504	G/A	1A	578933504	+	NA	NA	NA	NA	NA	NA	R	A	G	G	G	A	A	A	A	A	G	G	A	G	A	G	G	A	G	G	G	G	A	G	A	G	G	G	G	G	G	R	G	A	G	A	G	A	G
S1A_579218100	G/T	1A	579218100	+	NA	NA	NA	NA	NA	NA	G	K	G	T	G	G	G	G	G	G	G	T	G	G	G	G	N	G	G	G	G	G	G	G	G	G	G	T	G	G	T	K	G	G	K	T	T	G	G
S1A_579302715	G/C	1A	579302715	+	NA	NA	NA	NA	NA	NA	G	G	C	G	G	G	G	G	G	G	C	G	G	G	G	C	C	G	C	C	C	G	S	G	G	G	C	G	C	C	G	G	C	G	C	G	G	G	G
S1A_579863734	T/C	1A	579863734	+	NA	NA	NA	NA	NA	NA	C	T	T	T	C	T	T	T	T	T	T	T	T	T	T	T	T	T	T	T	T	C	T	C	T	C	T	T	T	T	T	T	T	T	T	T	T	T	C
S1A_580021442	G/T	1A	580021442	+	NA	NA	NA	NA	NA	NA	G	G	G	T	G	G	G	G	G	G	T	T	G	T	G	G	T	G	G	G	T	G	G	T	G	T	G	T	T	G	T	T	T	T	K	K	T	G	T
S1A_580421588	T/C	1A	580421588	+	NA	NA	NA	NA	NA	NA	T	T	T	T	T	T	T	T	T	T	C	T	T	T	N	T	C	T	T	T	T	T	T	T	T	T	T	T	C	T	T	T	C	T	Y	T	T	T	T
S1A_580421624	A/G	1A	580421624	+	NA	NA	NA	NA	NA	NA	R	R	A	G	A	A	R	A	N	N	G	G	A	G	A	A	N	R	A	A	N	A	A	G	A	G	A	N	G	A	N	G	G	A	N	R	G	A	G
S1A_580437431	T/C	1A	580437431	+	NA	NA	NA	NA	NA	NA	Y	Y	T	Y	T	T	Y	T	C	C	C	C	T	C	N	T	C	Y	N	T	C	T	T	C	T	C	T	C	C	T	C	C	C	Y	Y	Y	C	T	C
S1A_580452798	C/G	1A	580452798	+	NA	NA	NA	NA	NA	NA	S	C	C	C	C	C	C	C	C	C	G	C	C	C	C	C	G	C	C	C	C	C	C	C	C	C	C	C	G	C	C	C	G	C	G	C	C	C	C
S1A_580453168	G/A	1A	580453168	+	NA	NA	NA	NA	NA	NA	G	A	G	G	G	G	G	G	N	G	G	A	G	A	G	G	G	R	G	N	A	G	G	A	G	A	G	N	G	G	A	A	G	N	G	R	A	N	A
S1A_581263216	C/T	1A	581263216	+	NA	NA	NA	NA	NA	NA	C	C	C	T	C	N	C	C	C	C	C	C	C	T	C	C	C	Y	C	C	C	C	C	C	C	C	C	C	N	C	C	C	C	N	C	C	Y	C	C
S1A_581306774	C/T	1A	581306774	+	NA	NA	NA	NA	NA	NA	C	C	C	Y	C	C	Y	C	N	N	C	T	C	T	C	C	C	Y	C	C	T	C	C	N	C	T	C	T	N	C	T	T	N	C	C	T	T	C	T
S1A_581472188	A/C	1A	581472188	+	NA	NA	NA	NA	NA	NA	M	M	A	C	A	A	M	A	C	C	C	C	A	C	M	A	C	A	A	A	C	A	A	C	A	C	A	C	C	A	C	C	C	M	M	C	N	A	C
S1A_581606898	G/A	1A	581606898	+	NA	NA	NA	NA	NA	NA	R	G	G	G	G	G	G	G	G	G	A	G	G	G	R	N	A	G	N	G	G	G	N	G	G	G	G	G	A	G	G	G	A	G	N	G	G	G	G
S1A_582124837	G/A	1A	582124837	+	NA	NA	NA	NA	NA	NA	G	G	G	G	G	G	R	G	G	G	G	G	N	G	N	G	G	G	G	G	G	G	A	G	G	G	G	G	G	G	G	G	N	G	R	G	G	A	G
S1A_582124840	G/A	1A	582124840	+	NA	NA	NA	NA	NA	NA	G	G	G	G	G	G	R	G	G	G	G	G	N	G	N	G	G	G	G	G	G	G	A	G	G	G	G	G	G	G	G	G	N	G	R	G	G	A	G
S1A_582124850	G/A	1A	582124850	+	NA	NA	NA	NA	NA	NA	G	G	G	G	G	G	R	G	G	G	G	G	N	G	N	G	G	G	G	G	G	G	A	G	G	G	G	G	G	G	G	G	N	G	R	G	G	A	G
S1A_582276079	T/C	1A	582276079	+	NA	NA	NA	NA	NA	NA	T	C	T	Y	N	C	C	C	T	T	T	T	T	T	C	T	T	C	N	T	T	T	N	T	N	T	T	T	T	T	T	T	T	N	Y	C	T	C	T
S1A_582361416	G/A	1A	582361416	+	NA	NA	NA	NA	NA	NA	G	G	G	G	R	G	G	G	R	R	G	G	G	G	G	G	G	G	G	G	G	G	G	G	G	G	G	G	G	G	G	G	G	G	G	G	G	G	G
S1A_582361426	C/G	1A	582361426	+	NA	NA	NA	NA	NA	NA	C	C	C	C	S	C	C	C	S	S	C	C	C	C	C	C	C	C	C	C	C	C	C	C	C	C	C	C	C	C	C	C	C	C	C	C	C	C	C
S1A_582361437	T/C	1A	582361437	+	NA	NA	NA	NA	NA	NA	T	T	T	T	Y	T	T	T	Y	Y	T	T	T	T	T	T	T	T	T	T	T	T	T	T	T	T	T	T	T	T	T	T	T	T	T	T	T	T	T
S1A_582567767	G/A	1A	582567767	+	NA	NA	NA	NA	NA	NA	A	R	G	R	G	N	A	A	A	A	G	G	R	R	R	G	G	A	G	G	G	G	A	G	A	G	G	G	G	G	N	G	G	A	R	R	G	A	G
S1A_582745107	C/T	1A	582745107	+	NA	NA	NA	NA	NA	NA	Y	C	N	C	C	C	C	C	C	C	Y	Y	C	Y	Y	C	C	C	C	C	C	Y	C	C	C	Y	C	C	Y	C	Y	Y	Y	C	C	C	Y	C	Y
S1A_582745120	C/T	1A	582745120	+	NA	NA	NA	NA	NA	NA	Y	Y	N	Y	Y	Y	Y	Y	Y	C	Y	Y	Y	Y	Y	Y	Y	Y	C	Y	Y	Y	T	C	Y	Y	Y	Y	Y	Y	Y	Y	Y	C	C	Y	Y	Y	Y
S1A_582745124	C/A	1A	582745124	+	NA	NA	NA	NA	NA	NA	M	C	N	C	C	C	C	C	C	C	C	C	C	M	M	C	C	C	C	C	C	M	C	C	C	M	C	C	M	C	C	M	M	C	C	C	M	C	M
S1A_582855632	C/G	1A	582855632	+	NA	NA	NA	NA	NA	NA	C	C	C	N	C	C	N	C	C	C	C	C	C	C	S	C	C	C	N	C	C	S	S	N	C	G	C	S	C	C	S	C	C	S	C	C	C	C	C
S1A_582855675	C/T	1A	582855675	+	NA	NA	NA	NA	NA	NA	C	C	C	N	C	C	N	Y	Y	T	C	C	C	C	Y	Y	C	Y	N	C	C	C	Y	N	C	C	Y	C	C	C	C	C	C	C	C	C	C	C	C
S1A_583171719	T/C	1A	583171719	+	NA	NA	NA	NA	NA	NA	Y	C	T	C	T	N	C	C	C	C	T	C	C	C	C	T	T	C	T	T	C	T	C	T	C	T	T	C	T	T	C	N	T	Y	Y	C	C	C	T
S1A_583171751	G/A	1A	583171751	+	NA	NA	NA	NA	NA	NA	R	R	G	A	G	N	A	A	A	A	G	G	A	G	A	G	G	A	G	G	G	G	A	G	A	G	G	G	G	G	G	N	G	R	R	R	G	A	G
S1A_583289253	T/C	1A	583289253	+	NA	NA	NA	NA	NA	NA	T	T	T	T	T	T	T	N	T	T	C	T	N	T	T	T	C	T	T	N	T	T	T	T	N	T	T	N	C	N	T	T	C	N	C	T	T	T	T
S1A_583289269	T/C	1A	583289269	+	NA	NA	NA	NA	NA	NA	Y	C	T	Y	T	C	C	N	C	C	T	C	N	C	C	T	T	C	T	N	C	T	C	T	N	T	T	N	T	N	C	C	T	N	T	C	C	C	T
S1A_583451496	C/G	1A	583451496	+	NA	NA	NA	NA	NA	NA	S	C	G	N	S	N	C	C	C	C	G	C	S	N	N	S	G	C	G	C	C	G	C	S	C	S	S	C	G	C	C	C	G	C	G	C	C	C	S
S1A_583452904	A/G	1A	583452904	+	NA	NA	NA	NA	NA	NA	R	G	A	R	A	G	G	G	G	G	A	G	R	G	G	A	A	N	A	A	G	A	G	A	G	A	A	N	A	A	R	G	A	G	R	G	G	G	N
S1A_583529709	T/C	1A	583529709	+	NA	NA	NA	NA	NA	NA	Y	C	T	Y	T	N	Y	C	C	C	T	T	C	T	C	T	T	Y	T	T	T	T	C	T	C	T	T	T	T	T	T	T	T	C	T	Y	T	C	T
S1A_583895754	A/G	1A	583895754	+	NA	NA	NA	NA	NA	NA	A	G	A	G	A	A	R	G	G	G	A	A	R	A	N	A	A	G	A	A	A	A	G	A	G	A	A	A	A	A	A	A	A	A	R	R	A	G	A
S1A_583992199	C/T	1A	583992199	+	NA	NA	NA	NA	NA	NA	Y	Y	C	Y	C	C	T	T	T	T	C	C	Y	C	T	C	C	Y	C	C	C	C	T	C	T	C	C	C	C	C	C	C	C	Y	C	Y	C	T	C
S1A_583992209	C/G	1A	583992209	+	NA	NA	NA	NA	NA	NA	S	S	C	S	C	C	G	G	G	G	C	C	S	C	G	C	C	S	C	C	C	C	G	C	G	C	C	C	C	C	C	C	C	S	C	S	C	G	C
S1A_584083646	T/C	1A	584083646	+	NA	NA	NA	NA	NA	NA	T	T	T	T	T	T	T	T	T	T	T	T	T	T	C	T	T	T	T	T	T	T	T	T	T	T	N	T	T	T	T	T	T	Y	T	T	T	T	T
S1A_584084194	G/C	1A	584084194	+	NA	NA	NA	NA	NA	NA	S	S	G	S	G	G	S	C	S	S	N	G	G	G	C	G	G	C	G	G	G	G	C	G	C	G	G	G	G	G	G	G	G	C	G	S	G	C	G
S1A_584086271	G/T	1A	584086271	+	NA	NA	NA	NA	NA	NA	G	G	G	G	K	N	G	G	G	K	G	G	G	G	G	G	G	G	G	G	G	G	N	G	N	G	G	G	G	G	G	G	G	G	G	G	N	G	G
S1A_584086288	G/A	1A	584086288	+	NA	NA	NA	NA	NA	NA	G	G	G	G	R	N	G	G	G	R	G	G	G	G	G	G	G	G	G	G	G	G	N	G	N	G	G	G	G	G	G	G	G	G	G	G	N	G	G
S1A_584357344	T/G	1A	584357344	+	NA	NA	NA	NA	NA	NA	T	T	K	T	K	T	T	T	T	T	K	N	T	N	T	K	K	T	K	K	T	K	T	T	T	T	K	N	T	K	N	N	K	T	K	T	N	T	T
S1A_584357400	A/C	1A	584357400	+	NA	NA	NA	NA	NA	NA	A	A	M	A	M	A	A	A	A	A	C	N	A	N	A	M	M	A	M	M	A	M	A	A	A	A	M	N	M	M	N	N	M	A	M	A	N	A	A
S1A_584413167	A/G	1A	584413167	+	NA	NA	NA	NA	NA	NA	A	A	A	A	A	A	R	A	A	A	A	G	A	G	A	A	A	A	N	A	N	A	N	A	A	A	A	N	A	A	G	G	A	N	R	R	N	A	A
S1A_584413209	T/C	1A	584413209	+	NA	NA	NA	NA	NA	NA	T	T	T	T	T	T	Y	T	T	T	T	C	T	C	T	T	T	T	N	T	N	T	N	T	T	T	T	N	T	T	C	C	T	N	Y	Y	N	T	T
S1A_584413238	T/G	1A	584413238	+	NA	NA	NA	NA	NA	NA	K	N	T	T	T	T	T	T	T	T	N	G	T	G	T	T	T	K	T	T	N	T	T	T	T	T	T	G	T	T	G	G	T	T	T	G	G	T	T
S1A_584413248	G/C	1A	584413248	+	NA	NA	NA	NA	NA	NA	S	N	G	G	G	G	G	G	G	G	N	C	G	C	G	G	G	S	G	G	N	G	G	G	G	G	G	C	G	G	C	C	G	G	G	C	C	G	G
S1A_584598744	A/G	1A	584598744	+	NA	NA	NA	NA	NA	NA	R	R	A	G	A	A	R	G	A	A	G	A	R	A	R	A	G	R	A	A	A	A	G	G	G	G	A	A	G	A	A	A	G	G	G	R	A	G	G
S1A_584598767	T/C	1A	584598767	+	NA	NA	NA	NA	NA	NA	Y	Y	T	C	T	T	Y	C	T	T	C	T	Y	T	Y	T	C	Y	T	T	T	T	C	C	C	C	T	T	C	T	T	T	C	C	C	Y	T	C	C
S1A_584671763	G/C	1A	584671763	+	NA	NA	NA	NA	NA	NA	S	S	C	G	S	C	S	G	G	G	G	C	S	G	G	C	G	G	C	C	C	C	G	G	G	G	C	N	G	C	C	C	G	G	S	S	C	G	G
S1A_584671823	C/G	1A	584671823	+	NA	NA	NA	NA	NA	NA	C	S	C	G	S	C	S	G	S	S	G	C	S	C	G	C	G	G	C	C	C	C	C	C	C	C	C	C	G	C	C	C	G	S	S	S	C	C	C
S1A_584676757	G/C	1A	584676757	+	NA	NA	NA	NA	NA	NA	G	G	G	G	S	G	G	G	C	C	G	G	G	C	G	G	G	S	G	G	N	G	G	G	G	G	G	G	G	G	G	G	G	G	G	G	G	G	G
S1A_584676773	C/T	1A	584676773	+	NA	NA	NA	NA	NA	NA	C	C	C	C	Y	C	C	C	Y	Y	C	C	C	C	C	C	C	C	C	C	N	C	C	C	C	C	C	C	C	C	C	C	C	C	C	C	C	C	C
S1A_584676820	C/G	1A	584676820	+	NA	NA	NA	NA	NA	NA	S	C	S	C	S	C	S	C	C	C	C	S	C	C	C	S	C	C	S	S	S	S	S	C	S	C	S	S	C	S	S	S	C	C	C	S	S	S	C
S1A_584676829	G/A	1A	584676829	+	NA	NA	NA	NA	NA	NA	G	G	G	G	R	G	G	G	R	R	G	G	G	G	G	G	G	G	G	G	G	G	G	G	G	G	G	G	G	G	G	G	G	G	G	G	G	G	G
S1A_584811173	G/C	1A	584811173	+	NA	NA	NA	NA	NA	NA	G	G	G	G	C	G	G	G	S	S	G	G	G	G	G	G	G	G	G	N	G	G	G	N	G	N	N	G	G	G	G	N	G	N	G	G	G	G	N
S1A_584811178	A/C	1A	584811178	+	NA	NA	NA	NA	NA	NA	A	A	A	A	C	A	A	A	M	M	A	A	A	A	A	A	A	A	A	N	A	A	A	N	A	N	N	A	A	A	A	N	A	N	A	A	A	A	N
S1A_584811179	A/T	1A	584811179	+	NA	NA	NA	NA	NA	NA	A	A	A	A	T	A	A	A	W	W	A	A	A	A	A	A	A	A	A	N	A	A	A	N	A	N	N	A	A	A	A	N	A	N	A	A	A	A	N
S1A_584830516	A/G	1A	584830516	+	NA	NA	NA	NA	NA	NA	R	A	A	A	A	A	A	A	A	A	A	A	A	A	R	A	A	A	A	A	A	A	A	G	A	G	A	A	A	A	A	A	A	R	A	A	A	A	G
S1A_584830518	C/A	1A	584830518	+	NA	NA	NA	NA	NA	NA	M	C	C	C	C	C	C	C	C	C	C	C	C	C	M	C	C	C	C	C	C	C	C	A	C	A	C	C	C	C	C	C	C	M	C	C	C	C	A
S1A_584830529	C/T	1A	584830529	+	NA	NA	NA	NA	NA	NA	C	Y	T	C	Y	Y	Y	C	C	C	C	T	Y	C	C	Y	C	C	T	T	T	T	Y	C	Y	C	Y	T	C	T	T	Y	C	C	C	Y	T	Y	C
S1A_584830535	G/C	1A	584830535	+	NA	NA	NA	NA	NA	NA	G	G	G	G	S	S	S	G	G	G	G	G	G	G	G	S	G	G	G	G	G	G	S	G	S	G	S	G	G	G	G	S	G	G	G	G	G	S	G
S1A_584830555	G/A	1A	584830555	+	NA	NA	NA	NA	NA	NA	G	G	G	G	R	R	R	G	G	G	G	G	G	G	G	R	G	G	G	G	G	G	R	G	R	G	R	G	G	G	G	R	G	G	G	G	G	R	G
S1A_585453530	C/T	1A	585453530	+	NA	NA	NA	NA	NA	NA	C	C	C	C	C	C	Y	C	N	C	C	C	C	C	C	Y	C	C	C	N	C	Y	C	C	N	C	C	C	C	C	C	C	C	C	C	Y	C	Y	C
S1A_585453535	G/A	1A	585453535	+	NA	NA	NA	NA	NA	NA	G	G	G	G	G	G	G	G	N	G	G	G	G	G	R	G	G	G	G	N	G	G	G	G	N	G	G	R	G	G	R	R	G	G	G	G	G	G	G
S1A_585453556	C/T	1A	585453556	+	NA	NA	NA	NA	NA	NA	C	C	C	C	C	C	Y	C	N	C	C	C	C	C	C	Y	C	C	C	N	C	Y	C	C	N	C	C	C	C	C	C	C	C	C	C	Y	C	Y	C
S1A_585453558	C/T	1A	585453558	+	NA	NA	NA	NA	NA	NA	C	C	C	C	C	C	C	C	N	C	C	C	C	C	C	C	C	C	C	N	C	C	C	T	N	T	C	C	C	C	C	C	C	T	C	C	C	C	T
S1A_585453565	C/A	1A	585453565	+	NA	NA	NA	NA	NA	NA	C	C	C	C	C	C	C	C	N	C	C	C	C	C	C	C	C	C	C	N	C	C	C	A	N	A	C	C	C	C	C	C	C	C	C	C	C	C	A
S1A_585453578	C/T	1A	585453578	+	NA	NA	NA	NA	NA	NA	C	C	C	C	C	C	Y	C	N	C	C	C	C	C	C	Y	C	C	C	N	C	Y	C	C	N	C	C	C	C	C	C	C	C	C	C	Y	C	Y	C
S1A_585619708	G/T	1A	585619708	+	NA	NA	NA	NA	NA	NA	K	K	K	K	K	K	G	G	N	K	T	G	K	N	G	K	K	T	K	T	K	T	K	K	K	K	K	N	K	K	K	K	G	K	K	G	G	G	K
S1A_585619770	A/C	1A	585619770	+	NA	NA	NA	NA	NA	NA	A	A	A	A	M	A	A	N	M	M	A	N	A	A	A	A	A	A	A	A	A	A	A	A	A	A	A	N	A	A	N	A	A	A	A	A	A	A	A
S1A_585624643	A/G	1A	585624643	+	NA	NA	NA	NA	NA	NA	N	N	A	G	A	A	R	N	G	N	G	A	G	G	G	A	G	G	A	A	A	A	A	A	A	A	N	A	G	A	N	A	G	G	G	A	A	A	A
S1A_585624687	G/A	1A	585624687	+	NA	NA	NA	NA	NA	NA	N	N	G	A	G	G	R	N	A	N	A	G	A	A	A	G	A	A	G	G	G	G	G	G	G	G	N	G	A	G	N	G	A	A	A	G	G	G	G
S1A_585634621	G/A	1A	585634621	+	NA	NA	NA	NA	NA	NA	R	A	G	A	G	G	R	N	A	A	A	G	R	A	A	G	A	A	G	G	G	G	G	G	G	G	G	G	A	G	G	G	A	R	A	R	G	G	G
S1A_585645864	G/A	1A	585645864	+	NA	NA	NA	NA	NA	NA	A	A	G	A	G	G	A	N	N	A	A	G	A	A	A	G	A	A	G	G	G	N	G	A	G	A	G	N	A	G	N	G	N	A	N	A	N	G	A
S1A_585645875	A/G	1A	585645875	+	NA	NA	NA	NA	NA	NA	R	G	A	G	A	A	G	N	N	G	G	A	G	G	A	A	G	G	A	A	A	N	A	A	A	A	A	N	G	A	N	A	N	A	N	G	N	A	A
S1A_585656558	C/G	1A	585656558	+	NA	NA	NA	NA	NA	NA	S	G	C	G	C	C	S	G	G	G	G	C	S	G	G	C	G	G	C	C	C	C	C	C	C	C	N	C	G	C	C	C	G	S	G	C	C	C	C
S1A_585957042	C/T	1A	585957042	+	NA	NA	NA	NA	NA	NA	C	C	C	C	T	T	C	C	C	C	C	T	Y	C	C	C	C	C	C	C	T	T	T	C	T	C	C	T	C	C	T	T	C	C	T	Y	T	T	C
S1A_585957043	G/A	1A	585957043	+	NA	NA	NA	NA	NA	NA	G	G	G	G	A	A	G	G	G	G	G	A	R	G	G	G	G	G	G	G	A	A	A	G	A	G	G	A	G	G	A	A	G	G	A	R	A	A	G
S1A_585957044	A/T	1A	585957044	+	NA	NA	NA	NA	NA	NA	A	A	A	A	T	T	A	A	A	A	A	T	W	A	A	A	A	A	A	A	T	T	T	A	T	A	A	T	A	A	T	T	A	A	T	W	T	T	A
S1A_585957045	T/C	1A	585957045	+	NA	NA	NA	NA	NA	NA	T	T	T	T	C	C	T	T	T	T	T	C	Y	T	T	T	T	T	T	T	C	C	C	T	C	T	T	C	T	T	C	C	T	T	C	Y	C	C	T
S1A_586109076	C/G	1A	586109076	+	NA	NA	NA	NA	NA	NA	C	C	C	C	C	G	C	C	C	C	C	S	C	C	C	N	C	C	C	C	G	G	S	N	N	C	C	N	C	N	G	G	C	C	S	S	G	C	N
S1A_586256238	G/A	1A	586256238	+	NA	NA	NA	NA	NA	NA	G	G	G	G	A	G	G	G	G	G	G	R	N	G	G	G	G	G	G	G	A	A	R	G	R	G	G	R	N	N	G	R	G	G	N	N	G	R	G
S1A_586256244	C/T	1A	586256244	+	NA	NA	NA	NA	NA	NA	C	C	C	C	T	C	C	C	C	C	C	Y	N	C	C	C	C	C	C	C	T	T	Y	C	Y	C	C	Y	N	N	C	Y	C	C	N	N	C	Y	C
S1A_586256248	G/A	1A	586256248	+	NA	NA	NA	NA	NA	NA	R	G	G	G	G	G	G	G	G	G	G	G	N	G	G	G	G	R	G	G	G	G	G	G	G	G	G	G	N	N	G	G	G	R	N	N	G	G	G
S1A_586256258	T/C	1A	586256258	+	NA	NA	NA	NA	NA	NA	Y	T	T	T	T	T	T	T	T	T	T	T	N	T	T	T	T	Y	T	T	T	T	T	T	T	T	T	T	N	N	T	T	T	Y	N	N	T	T	T
S1A_586348310	C/T	1A	586348310	+	NA	NA	NA	NA	NA	NA	C	C	C	C	C	C	C	C	Y	Y	C	C	C	C	C	C	C	C	C	C	C	C	C	C	C	C	C	C	C	C	C	C	C	C	C	C	C	C	C
S1A_586348343	G/A	1A	586348343	+	NA	NA	NA	NA	NA	NA	G	G	G	G	G	G	G	G	R	R	G	G	G	G	G	G	G	G	G	G	G	G	G	G	G	G	G	G	G	G	G	G	G	G	G	G	G	G	G
S1A_586597796	G/A	1A	586597796	+	NA	NA	NA	NA	NA	NA	R	A	G	G	G	G	A	A	G	G	A	G	R	G	A	G	N	A	N	G	G	G	A	A	A	A	G	G	A	G	G	G	A	A	R	R	G	A	A
S1A_586603730	A/G	1A	586603730	+	NA	NA	NA	NA	NA	NA	N	R	N	A	A	A	R	G	A	A	G	A	R	A	G	N	G	G	A	A	A	A	G	N	G	G	N	A	R	A	A	A	G	G	G	G	A	G	G
S1A_586660605	A/G	1A	586660605	+	NA	NA	NA	NA	NA	NA	R	G	A	A	A	A	R	G	A	A	G	A	R	A	G	A	G	R	A	A	A	A	G	G	G	G	A	A	G	A	A	A	G	G	R	R	A	G	G
S1A_586660628	C/A	1A	586660628	+	NA	NA	NA	NA	NA	NA	M	A	C	C	C	C	M	A	C	C	A	C	M	C	A	C	A	M	C	C	C	C	A	A	A	A	C	C	A	C	C	C	A	A	M	M	C	A	A
S1A_587671963	C/A	1A	587671963	+	NA	NA	NA	NA	NA	NA	C	M	C	C	C	C	N	A	C	C	A	N	N	C	A	C	A	C	C	C	C	C	A	A	A	A	C	C	A	C	N	C	A	A	C	M	C	A	N
S1A_587672017	C/A	1A	587672017	+	NA	NA	NA	NA	NA	NA	C	M	C	C	C	C	N	A	C	C	A	N	N	C	A	C	A	C	C	C	C	C	A	A	A	A	C	C	A	C	N	C	A	A	C	M	C	A	N
S1A_587736663	G/A	1A	587736663	+	NA	NA	NA	NA	NA	NA	R	R	A	G	R	R	R	G	G	G	G	A	R	G	G	A	G	G	A	A	R	R	G	G	G	G	A	A	G	A	A	G	G	G	G	R	R	G	G
S1A_587771624	G/A	1A	587771624	+	NA	NA	NA	NA	NA	NA	G	G	G	G	G	G	G	N	G	N	G	G	G	G	G	G	N	N	G	G	G	G	G	G	N	G	N	G	G	N	G	G	G	G	N	G	G	G	G
S1A_587771652	C/T	1A	587771652	+	NA	NA	NA	NA	NA	NA	C	C	C	C	C	C	C	N	C	N	C	C	C	C	C	C	N	N	C	C	C	C	C	C	N	C	N	C	C	N	C	C	C	C	N	C	C	C	C
S1A_587860891	T/C	1A	587860891	+	NA	NA	NA	NA	NA	NA	T	T	T	C	T	T	T	C	C	C	C	T	T	C	C	T	C	C	T	T	T	T	C	N	C	C	N	N	C	T	T	T	C	C	T	T	T	C	C
S1A_587863933	T/C	1A	587863933	+	NA	NA	NA	NA	NA	NA	Y	C	T	C	T	T	C	C	C	C	C	T	C	C	C	T	C	C	N	T	T	T	C	C	C	N	T	T	C	T	T	T	C	C	T	T	T	C	C
S1A_588018477	G/A	1A	588018477	+	NA	NA	NA	NA	NA	NA	G	G	G	A	G	G	G	A	A	A	A	G	G	A	A	G	A	A	G	G	G	N	A	A	A	A	G	G	A	G	G	G	A	A	A	G	G	A	A
S1A_588098228	A/G	1A	588098228	+	NA	NA	NA	NA	NA	NA	R	A	A	G	A	A	A	G	G	G	G	A	A	G	G	A	G	G	A	A	A	A	R	G	G	G	A	A	G	A	A	A	G	G	G	A	A	G	G
S1A_588491987	A/G	1A	588491987	+	NA	NA	NA	NA	NA	NA	R	A	A	A	A	A	N	R	R	A	A	A	A	A	R	A	A	R	A	A	A	A	A	A	G	A	R	A	A	A	A	A	A	A	A	A	A	A	A
S1A_588491996	C/T	1A	588491996	+	NA	NA	NA	NA	NA	NA	Y	C	C	C	C	C	N	Y	Y	C	C	C	C	C	Y	C	C	Y	C	C	C	C	Y	C	T	C	Y	C	Y	C	C	C	Y	C	C	C	C	C	C
S1A_588900092	C/G	1A	588900092	+	NA	NA	NA	NA	NA	NA	C	S	C	C	C	S	C	S	C	C	C	C	C	C	S	S	C	S	S	S	C	C	C	C	S	C	S	C	S	S	C	C	C	C	C	C	C	C	S
S1A_588900097	T/A	1A	588900097	+	NA	NA	NA	NA	NA	NA	T	W	T	T	T	W	T	W	T	T	T	T	T	T	W	W	T	W	W	W	T	T	T	T	W	T	W	T	W	W	T	T	T	T	T	T	T	T	W
S1A_588900135	G/C	1A	588900135	+	NA	NA	NA	NA	NA	NA	S	S	G	G	G	S	G	S	G	G	G	G	G	G	S	S	G	S	S	S	G	G	G	G	S	G	S	G	S	S	G	G	S	G	G	S	G	G	S
S1A_588907880	A/G	1A	588907880	+	NA	NA	NA	NA	NA	NA	A	A	A	A	G	G	R	A	A	A	A	G	R	A	A	A	A	N	A	A	G	G	A	A	A	A	A	G	A	A	G	G	A	A	A	R	G	A	A
S1A_588907934	C/A	1A	588907934	+	NA	NA	NA	NA	NA	NA	C	M	C	C	A	A	M	C	C	C	C	A	M	C	C	C	C	C	C	C	A	A	M	C	C	C	N	A	C	C	A	A	C	C	M	A	A	C	C
S1A_588913155	G/A	1A	588913155	+	NA	NA	NA	NA	NA	NA	R	R	G	G	R	R	G	G	G	R	R	R	R	R	G	G	R	R	G	G	G	G	G	R	G	G	G	R	G	G	R	R	R	G	R	G	G	G	R
S1A_588913168	C/T	1A	588913168	+	NA	NA	NA	NA	NA	NA	C	C	Y	C	Y	C	C	C	C	C	Y	C	C	C	C	C	C	C	C	C	C	C	C	Y	C	C	C	C	Y	C	C	C	Y	C	Y	C	C	C	C
S1A_588913170	G/A	1A	588913170	+	NA	NA	NA	NA	NA	NA	R	R	G	G	R	R	G	G	G	R	R	R	R	R	G	G	R	R	G	G	G	G	G	R	G	G	G	R	G	G	R	R	R	G	R	G	G	G	R
S1A_589032846	T/C	1A	589032846	+	NA	NA	NA	NA	NA	NA	Y	T	T	Y	Y	Y	T	Y	Y	Y	Y	Y	Y	Y	T	T	Y	Y	T	T	T	T	T	Y	Y	T	T	Y	Y	T	Y	Y	Y	T	Y	Y	T	T	Y
S1A_589032887	A/T	1A	589032887	+	NA	NA	NA	NA	NA	NA	W	A	A	W	W	W	A	W	W	W	W	W	W	W	A	A	W	W	A	A	A	A	A	W	W	A	A	W	W	A	W	W	W	A	W	W	A	A	W
S1A_589052632	A/G	1A	589052632	+	NA	NA	NA	NA	NA	NA	R	R	A	A	G	G	R	A	A	A	N	G	R	A	A	A	A	A	A	A	G	G	G	A	N	N	A	G	N	A	G	G	N	A	G	G	G	N	A
S1A_589247676	C/T	1A	589247676	+	NA	NA	NA	NA	NA	NA	Y	Y	C	C	C	Y	C	Y	Y	Y	C	C	C	C	Y	Y	C	Y	Y	Y	C	C	Y	C	Y	C	Y	C	Y	Y	C	C	Y	C	C	Y	C	C	Y
S1A_589510611	T/C	1A	589510611	+	NA	NA	NA	NA	NA	NA	Y	Y	T	T	T	Y	T	Y	Y	Y	T	T	T	T	Y	Y	T	Y	Y	Y	T	T	Y	T	Y	T	Y	T	Y	Y	T	T	Y	T	Y	Y	T	N	Y
S1A_589510613	G/T	1A	589510613	+	NA	NA	NA	NA	NA	NA	K	K	G	G	G	K	G	K	K	K	G	G	G	G	K	K	G	K	K	K	G	G	K	G	K	G	K	G	K	K	K	G	K	G	K	K	G	N	K
S1A_589510618	T/C	1A	589510618	+	NA	NA	NA	NA	NA	NA	Y	T	C	C	C	Y	Y	T	Y	Y	T	C	Y	C	T	Y	T	T	Y	Y	C	C	T	T	T	T	Y	C	T	Y	Y	C	T	T	T	T	C	N	T
S1A_589576326	C/T	1A	589576326	+	NA	NA	NA	NA	NA	NA	C	N	C	Y	C	Y	N	C	Y	Y	C	N	C	Y	C	C	C	Y	C	C	C	C	Y	C	C	C	C	C	C	C	N	C	C	C	C	C	N	Y	C
S1A_589576341	G/A	1A	589576341	+	NA	NA	NA	NA	NA	NA	G	N	G	R	G	R	N	G	R	R	G	N	G	R	G	G	G	R	G	G	G	G	R	G	G	G	G	G	G	G	N	G	G	G	G	G	N	R	G
S1A_589629327	A/G	1A	589629327	+	NA	NA	NA	NA	NA	NA	N	R	A	A	A	A	G	N	A	A	A	A	R	A	G	A	A	A	A	A	A	A	A	G	A	A	A	A	A	A	A	A	A	N	A	R	A	A	G
S1A_589639385	A/G	1A	589639385	+	NA	NA	NA	NA	NA	NA	R	R	A	G	A	A	R	G	G	G	G	A	R	G	G	R	G	G	A	A	A	A	G	G	G	G	A	A	G	A	A	A	G	G	G	R	A	G	G
S1A_589726098	G/C	1A	589726098	+	NA	NA	NA	NA	NA	NA	S	G	N	G	C	C	S	G	G	N	G	C	G	G	G	C	G	G	C	C	S	C	S	G	N	G	C	C	G	C	C	C	G	G	S	G	C	G	G
S1A_589792067	G/C	1A	589792067	+	NA	NA	NA	NA	NA	NA	S	S	G	S	G	S	G	S	S	S	S	S	S	S	S	S	S	S	S	S	S	S	S	S	S	S	S	S	S	S	S	S	S	S	S	S	S	S	G
S1A_589792334	C/G	1A	589792334	+	NA	NA	NA	NA	NA	NA	C	S	S	S	S	S	S	S	S	C	S	S	S	S	S	S	S	S	S	S	S	S	S	S	S	S	C	S	S	S	S	S	S	S	S	S	S	S	S
S1A_589792346	C/G	1A	589792346	+	NA	NA	NA	NA	NA	NA	S	S	S	S	S	S	S	S	S	S	S	S	S	S	C	C	S	S	S	S	S	S	S	S	S	S	C	S	S	S	S	S	S	S	C	S	S	S	C
S1A_589991363	G/A	1A	589991363	+	NA	NA	NA	NA	NA	NA	A	A	G	A	G	G	A	A	A	A	A	G	R	A	A	G	R	A	G	G	G	G	G	A	N	G	G	G	A	G	G	G	A	A	A	R	G	G	A
S1A_589995287	A/T	1A	589995287	+	NA	NA	NA	NA	NA	NA	A	T	A	T	A	A	A	T	T	T	T	A	W	T	N	A	N	T	A	A	A	A	T	T	T	T	A	A	T	A	A	A	T	N	T	T	A	T	T
S1A_590142135	C/T	1A	590142135	+	NA	NA	NA	NA	NA	NA	C	Y	C	T	C	C	Y	N	T	T	T	C	T	C	Y	C	Y	C	C	C	C	C	C	C	C	C	C	C	T	C	C	C	T	T	Y	Y	C	C	C
S1A_590237673	A/G	1A	590237673	+	NA	NA	NA	NA	NA	NA	A	A	A	A	R	A	A	A	A	R	A	A	A	A	A	A	A	A	A	A	A	A	N	A	N	N	A	A	A	A	A	A	A	A	A	A	A	N	A
S1A_590237679	C/T	1A	590237679	+	NA	NA	NA	NA	NA	NA	C	C	C	C	Y	C	C	C	C	Y	C	C	C	C	C	C	C	C	C	C	C	C	N	C	N	N	C	C	C	C	C	C	C	C	C	C	C	N	C
S1A_590240874	C/A	1A	590240874	+	NA	NA	NA	NA	NA	NA	C	C	C	C	M	C	C	C	M	M	C	C	C	C	N	C	C	C	C	C	C	C	N	C	N	N	C	C	C	C	C	C	C	C	C	C	C	N	C
S1A_590240890	C/T	1A	590240890	+	NA	NA	NA	NA	NA	NA	C	Y	C	T	C	C	Y	C	Y	Y	T	C	Y	C	N	C	T	C	C	C	C	C	N	C	N	N	C	C	T	C	C	C	T	Y	Y	C	C	N	C
S1A_590429466	G/T	1A	590429466	+	NA	NA	NA	NA	NA	NA	G	G	G	G	G	G	G	G	G	G	G	N	G	T	N	G	N	K	G	G	G	G	N	T	N	N	G	G	G	G	G	G	G	G	G	G	N	N	N
S1A_590429510	C/T	1A	590429510	+	NA	NA	NA	NA	NA	NA	C	C	C	C	C	C	C	C	C	C	C	N	C	T	N	C	N	Y	C	C	C	C	N	T	N	N	C	C	C	C	C	C	C	C	C	C	N	N	N
S1A_590521746	C/T	1A	590521746	+	NA	NA	NA	NA	NA	NA	C	Y	C	C	Y	C	C	Y	C	C	N	C	C	C	C	C	C	C	C	C	C	Y	C	C	C	C	C	C	C	C	C	T	C	C	C	Y	C	C	C
S1A_590521780	C/T	1A	590521780	+	NA	NA	NA	NA	NA	NA	C	C	Y	C	Y	Y	C	C	C	C	N	Y	C	C	Y	Y	C	Y	Y	C	C	C	C	C	Y	C	C	C	C	C	C	C	C	Y	C	C	C	C	Y
S1A_590521820	G/T	1A	590521820	+	NA	NA	NA	NA	NA	NA	G	G	K	G	K	K	G	G	K	N	N	T	G	G	K	K	G	K	K	G	G	G	G	G	T	G	G	N	G	G	G	G	G	K	G	G	K	G	K
S1A_590554922	C/A	1A	590554922	+	NA	NA	NA	NA	NA	NA	C	C	C	C	C	C	C	C	C	C	C	C	C	A	C	C	C	C	C	C	C	C	N	A	N	N	C	C	C	C	C	C	N	M	C	C	C	N	A
S1A_590967799	G/A	1A	590967799	+	NA	NA	NA	NA	NA	NA	R	R	G	A	G	G	A	A	A	A	A	G	R	G	R	G	R	A	G	G	N	G	G	A	G	G	G	G	A	G	G	G	R	A	A	A	G	G	A
S1A_590967811	G/A	1A	590967811	+	NA	NA	NA	NA	NA	NA	G	R	R	G	G	G	G	G	G	G	G	A	R	G	R	R	R	G	R	R	N	G	R	G	A	R	R	A	G	R	G	G	G	G	G	G	G	R	G
S1A_590967860	G/A	1A	590967860	+	NA	NA	NA	NA	NA	NA	R	G	R	G	R	R	N	G	G	G	G	N	G	G	R	R	G	G	R	R	N	R	G	G	G	G	R	N	G	R	A	N	G	G	G	G	G	G	G
S1A_590967862	C/T	1A	590967862	+	NA	NA	NA	NA	NA	NA	Y	T	C	T	C	C	N	T	T	T	T	N	Y	C	Y	C	Y	Y	C	C	N	C	C	T	C	C	C	N	T	C	C	N	T	Y	T	T	C	C	T
S1A_590967863	C/G	1A	590967863	+	NA	NA	NA	NA	NA	NA	S	C	S	C	S	S	N	C	C	C	C	N	S	C	C	S	S	C	S	S	N	S	S	C	S	S	S	N	C	S	C	N	C	C	C	C	G	G	C
S1A_590967871	T/C	1A	590967871	+	NA	NA	NA	NA	NA	NA	T	T	Y	T	T	T	N	T	T	T	T	N	T	T	T	Y	Y	T	Y	Y	N	T	Y	T	Y	Y	Y	N	T	Y	T	N	T	T	T	T	T	Y	T
S1A_591498283	A/T	1A	591498283	+	NA	NA	NA	NA	NA	NA	W	T	A	T	A	A	N	W	T	T	T	A	T	A	A	A	N	W	A	N	A	A	N	A	N	N	A	N	T	A	A	A	T	N	T	W	A	N	N
S1A_591612534	G/C	1A	591612534	+	NA	NA	NA	NA	NA	NA	S	G	S	G	G	S	G	G	G	G	G	G	G	G	G	S	G	G	S	G	G	G	G	N	C	G	G	N	G	G	G	G	N	G	G	G	G	G	S
S1A_592325560	G/A	1A	592325560	+	NA	NA	NA	NA	NA	NA	G	G	G	G	R	G	G	G	A	G	G	G	G	G	G	G	G	G	G	G	G	G	G	G	G	G	G	G	G	G	G	G	G	G	G	G	G	G	G
S1A_592325566	G/C	1A	592325566	+	NA	NA	NA	NA	NA	NA	G	G	G	G	S	G	G	G	C	G	G	G	G	G	G	G	G	G	G	G	G	G	G	G	G	G	G	G	G	G	G	G	G	G	G	G	G	G	G
S1A_592325581	C/A	1A	592325581	+	NA	NA	NA	NA	NA	NA	M	M	C	C	C	C	M	A	C	A	C	C	M	C	A	C	M	M	C	C	C	C	C	C	C	C	C	C	C	C	C	C	C	M	C	C	C	C	C
S1A_592532938	G/A	1A	592532938	+	NA	NA	NA	NA	NA	NA	G	G	G	G	G	G	G	G	G	G	G	G	G	G	G	G	G	R	G	G	G	G	G	A	G	G	G	G	G	G	G	G	G	G	G	G	G	G	A
S1A_593790090	A/G	1A	593790090	+	NA	NA	NA	NA	NA	NA	G	A	G	G	A	A	A	G	G	G	G	A	A	G	A	G	G	G	G	G	A	A	G	G	G	G	G	A	G	G	A	A	G	A	R	A	A	G	G
S1B_1209188	A/C	1B	1209188	+	NA	NA	NA	NA	NA	NA	A	A	A	C	A	A	A	A	A	A	A	A	C	A	M	A	A	A	A	A	A	A	A	A	A	A	N	C	A	A	C	A	A	N	A	C	A	A	A
S1B_1305136	G/T	1B	1305136	+	NA	NA	NA	NA	NA	NA	G	G	G	G	G	G	G	G	G	G	G	G	G	G	G	G	N	G	K	K	G	G	G	G	K	G	G	T	G	G	G	K	G	K	G	G	N	G	K
S1B_1305138	T/G	1B	1305138	+	NA	NA	NA	NA	NA	NA	T	T	T	T	T	T	T	T	T	T	T	T	T	T	T	T	N	T	K	K	T	T	T	T	K	T	T	G	T	T	T	K	T	K	T	T	N	T	K
S1B_1306112	C/T	1B	1306112	+	NA	NA	NA	NA	NA	NA	N	C	Y	C	C	C	C	C	C	C	C	C	C	Y	C	C	N	C	C	N	C	C	N	N	N	C	Y	C	C	C	C	C	C	T	C	C	C	C	C
S1B_1306145	G/T	1B	1306145	+	NA	NA	NA	NA	NA	NA	N	G	K	G	G	G	G	G	G	G	G	K	G	K	G	G	N	G	G	N	G	G	N	N	N	G	K	G	K	G	G	G	K	T	G	G	G	G	G
S1B_1306167	G/A	1B	1306167	+	NA	NA	NA	NA	NA	NA	N	G	R	G	G	G	G	G	G	G	G	G	G	R	G	G	N	G	G	N	G	G	N	N	N	G	R	G	G	G	G	G	G	A	G	G	G	G	G
S1B_1433982	A/G	1B	1433982	+	NA	NA	NA	NA	NA	NA	A	A	A	A	A	A	A	A	A	A	A	R	A	A	A	A	A	A	A	A	A	A	A	A	A	A	A	A	A	A	A	A	A	G	A	A	A	A	A
S1B_1433985	G/A	1B	1433985	+	NA	NA	NA	NA	NA	NA	G	G	G	G	G	G	G	G	G	G	G	R	G	G	G	G	G	G	G	G	G	G	G	G	G	G	G	G	G	G	G	G	G	A	G	G	G	G	G
S1B_1434060	G/T	1B	1434060	+	NA	NA	NA	NA	NA	NA	K	G	N	G	T	T	G	K	G	T	G	G	G	T	N	G	T	T	G	N	G	G	T	G	T	T	G	N	G	G	G	G	G	N	G	G	N	T	K
S1B_1490349	G/A	1B	1490349	+	NA	NA	NA	NA	NA	NA	G	G	G	G	A	N	G	N	A	N	G	G	G	A	G	G	A	A	G	G	G	G	A	G	N	G	G	G	G	G	G	G	G	N	G	G	G	A	A
S1B_1533947	C/T	1B	1533947	+	NA	NA	NA	NA	NA	NA	C	C	C	C	C	C	C	C	C	Y	Y	C	C	C	C	C	C	C	C	Y	C	C	C	C	C	C	C	C	C	Y	C	C	Y	C	C	C	C	C	C
S1B_1687651	G/A	1B	1687651	+	NA	NA	NA	NA	NA	NA	R	G	R	R	R	G	G	R	R	A	A	R	R	R	R	R	R	G	R	G	R	R	R	R	G	R	R	G	R	R	G	R	A	R	A	A	R	R	R
S1B_1687684	G/A	1B	1687684	+	NA	NA	NA	NA	NA	NA	R	G	R	R	R	G	G	R	R	A	A	R	R	R	R	R	R	G	R	G	R	R	R	R	G	R	R	G	R	R	G	R	A	R	A	A	R	R	R
S1B_2244815	G/C	1B	2244815	+	NA	NA	NA	NA	NA	NA	S	S	G	G	S	S	S	S	G	G	S	S	G	G	S	G	S	S	G	G	S	S	G	S	S	S	G	S	G	G	S	S	G	S	S	S	S	G	G
S1B_2791543	A/G	1B	2791543	+	NA	NA	NA	NA	NA	NA	N	R	N	A	A	A	A	A	A	A	R	G	N	G	R	A	R	A	A	A	A	A	A	A	A	A	A	A	R	A	A	R	G	N	A	R	A	G	A
S1B_3081600	A/G	1B	3081600	+	NA	NA	NA	NA	NA	NA	A	A	R	A	R	R	N	A	R	R	R	A	A	R	G	R	R	A	R	R	A	A	R	R	R	G	R	R	R	R	R	A	R	N	R	R	R	A	R
S1B_3081625	A/T	1B	3081625	+	NA	NA	NA	NA	NA	NA	A	A	W	A	W	W	N	A	W	W	W	A	A	W	T	W	W	A	W	W	A	A	W	W	W	T	W	W	W	W	W	A	W	N	W	W	W	A	W
S1B_3162968	A/G	1B	3162968	+	NA	NA	NA	NA	NA	NA	A	A	R	A	R	N	A	A	A	A	N	N	N	A	A	R	A	A	N	R	A	N	A	A	A	A	N	A	A	A	A	A	A	A	A	A	A	A	N
S1B_3162983	C/A	1B	3162983	+	NA	NA	NA	NA	NA	NA	C	C	M	A	M	N	M	C	M	C	N	N	N	C	C	M	M	C	N	A	M	N	A	A	A	A	N	A	C	A	A	A	C	C	C	M	A	M	N
S1B_3162985	G/A	1B	3162985	+	NA	NA	NA	NA	NA	NA	G	G	R	G	R	N	G	G	G	G	N	N	N	G	G	R	G	G	N	R	G	N	G	G	G	G	N	G	G	G	G	G	G	G	G	G	G	G	N
S1B_3163214	A/C	1B	3163214	+	NA	NA	NA	NA	NA	NA	A	M	A	M	A	M	M	M	M	M	M	M	M	M	M	A	M	A	A	A	M	M	M	M	M	A	A	A	M	A	M	A	M	A	M	M	A	M	M
S1B_3163216	C/T	1B	3163216	+	NA	NA	NA	NA	NA	NA	C	Y	Y	Y	C	Y	Y	Y	Y	Y	Y	Y	Y	Y	Y	Y	Y	C	Y	Y	Y	Y	Y	Y	Y	Y	Y	C	Y	Y	Y	C	Y	C	Y	Y	Y	Y	Y
S1B_3163235	C/G	1B	3163235	+	NA	NA	NA	NA	NA	NA	C	C	S	C	C	C	C	C	C	C	C	C	C	S	C	S	C	C	S	S	C	C	C	C	C	S	S	C	C	S	C	C	C	C	C	C	S	C	C
S1B_3163253	A/C	1B	3163253	+	NA	NA	NA	NA	NA	NA	A	A	M	A	A	A	A	A	A	A	A	A	A	M	A	M	A	A	M	M	A	A	A	A	A	M	M	A	A	M	A	A	A	A	A	A	M	A	A
S1B_3164642	T/G	1B	3164642	+	NA	NA	NA	NA	NA	NA	T	T	K	T	K	T	T	T	T	T	T	T	T	T	T	K	T	T	K	K	T	T	T	T	T	K	K	T	T	K	T	T	T	T	T	T	K	T	K
S1B_3164683	C/T	1B	3164683	+	NA	NA	NA	NA	NA	NA	C	C	Y	C	Y	C	C	C	C	C	C	C	C	Y	C	Y	C	C	Y	Y	C	C	C	C	C	Y	T	C	C	Y	C	C	C	C	C	C	Y	C	Y
S1B_3164696	T/C	1B	3164696	+	NA	NA	NA	NA	NA	NA	T	T	Y	T	Y	T	T	T	T	T	T	T	T	T	T	Y	T	T	Y	Y	T	T	T	T	T	Y	Y	T	T	Y	T	T	T	T	T	T	Y	T	Y
S1B_3179348	G/A	1B	3179348	+	NA	NA	NA	NA	NA	NA	G	R	G	G	N	G	G	G	G	G	G	A	G	G	G	G	G	G	G	G	R	R	G	N	G	G	G	G	G	G	G	R	G	G	G	G	G	G	G
S1B_3179357	C/G	1B	3179357	+	NA	NA	NA	NA	NA	NA	C	S	C	S	N	C	C	C	S	C	C	C	S	S	S	C	S	C	C	C	S	S	S	N	S	C	C	S	C	C	S	C	C	C	C	S	C	S	C
S1B_3211750	A/G	1B	3211750	+	NA	NA	NA	NA	NA	NA	A	A	A	R	R	R	A	A	R	R	R	A	R	R	R	A	A	A	A	A	A	A	R	R	R	A	A	A	R	A	R	A	R	A	R	R	A	R	A
S1B_3211758	A/G	1B	3211758	+	NA	NA	NA	NA	NA	NA	A	A	A	R	R	R	A	A	R	R	R	A	R	R	R	A	A	A	A	A	A	A	R	R	R	A	A	A	R	A	R	A	R	A	R	R	A	R	A
S1B_3211781	C/A	1B	3211781	+	NA	NA	NA	NA	NA	NA	M	M	C	M	A	M	M	M	M	M	M	M	M	M	M	M	M	M	M	M	M	C	M	M	M	C	C	C	M	M	M	M	M	C	M	M	M	M	C
S1B_3211791	T/A	1B	3211791	+	NA	NA	NA	NA	NA	NA	W	W	T	T	W	W	W	W	T	W	T	W	T	W	T	W	W	W	W	W	W	T	W	T	T	T	T	T	T	W	T	W	T	T	T	T	W	T	T
S1B_3213129	G/A	1B	3213129	+	NA	NA	NA	NA	NA	NA	G	R	R	R	A	G	G	R	R	R	R	G	R	R	R	R	R	R	R	R	R	G	R	R	R	A	R	R	R	R	R	R	R	G	R	R	R	R	R
S1B_3213199	G/C	1B	3213199	+	NA	NA	NA	NA	NA	NA	S	S	G	G	G	G	C	S	G	G	G	S	G	G	N	G	G	S	G	G	C	S	G	S	G	G	G	G	G	G	G	S	G	G	G	S	G	G	G
S1B_3213223	C/G	1B	3213223	+	NA	NA	NA	NA	NA	NA	S	S	S	S	S	C	C	S	C	S	S	S	C	C	N	C	C	S	S	S	C	S	S	S	S	S	C	C	C	S	S	S	G	G	S	S	S	S	C
S1B_3214069	T/A	1B	3214069	+	NA	NA	NA	NA	NA	NA	T	T	W	T	N	N	T	T	N	T	T	T	T	T	N	A	T	N	T	A	T	T	T	T	N	W	W	T	T	T	N	T	T	N	T	T	A	T	T
S1B_3222807	C/T	1B	3222807	+	NA	NA	NA	NA	NA	NA	C	C	C	C	Y	C	C	C	C	C	C	C	C	C	C	C	C	C	C	N	C	C	C	C	Y	C	C	C	Y	C	C	C	C	C	C	C	C	Y	C
S1B_3222810	G/T	1B	3222810	+	NA	NA	NA	NA	NA	NA	G	G	G	G	K	G	G	G	G	G	G	G	G	G	G	G	G	G	G	N	G	G	G	G	K	G	G	G	K	G	G	G	G	G	G	G	G	K	G
S1B_3222816	C/G	1B	3222816	+	NA	NA	NA	NA	NA	NA	C	C	C	C	S	C	C	C	C	C	C	C	C	C	C	C	C	C	C	N	C	C	C	C	S	C	C	C	S	C	C	C	C	C	C	C	C	S	C
S1B_3222829	G/A	1B	3222829	+	NA	NA	NA	NA	NA	NA	G	G	G	G	R	G	G	G	G	G	G	G	G	G	G	G	G	G	G	N	G	G	G	G	R	G	G	G	R	G	G	G	G	G	G	G	G	R	G
S1B_3569582	A/C	1B	3569582	+	NA	NA	NA	NA	NA	NA	A	A	A	A	A	A	A	M	A	A	C	N	A	A	A	A	A	A	A	A	M	A	A	M	A	A	A	A	C	A	A	A	N	A	A	A	A	A	A
S1B_3569598	C/A	1B	3569598	+	NA	NA	NA	NA	NA	NA	A	A	C	C	C	C	A	A	C	C	A	N	C	C	C	C	C	A	C	C	A	A	C	A	C	C	C	C	A	C	C	A	N	A	C	C	C	C	M
S1B_3569600	T/G	1B	3569600	+	NA	NA	NA	NA	NA	NA	T	T	T	T	T	T	T	K	T	T	G	N	T	T	T	T	T	T	T	T	K	T	T	K	T	T	T	T	G	T	T	T	N	T	T	T	T	T	T
S1B_3572482	G/A	1B	3572482	+	NA	NA	NA	NA	NA	NA	A	A	G	G	G	G	A	A	G	G	G	A	G	G	G	G	G	A	G	N	A	A	G	R	G	G	G	G	G	G	G	A	R	A	G	R	R	G	R
S1B_3572513	C/T	1B	3572513	+	NA	NA	NA	NA	NA	NA	C	C	C	C	C	C	C	C	C	C	T	C	C	C	C	C	C	C	C	N	C	C	C	Y	C	C	C	C	T	C	C	C	Y	C	T	C	C	C	C
S1B_4349623	A/G	1B	4349623	+	NA	NA	NA	NA	NA	NA	A	A	A	G	G	G	A	A	G	G	A	A	G	G	G	A	G	A	A	A	A	A	G	A	G	A	A	G	R	A	G	A	A	A	A	R	A	G	A
S1B_5001706	G/A	1B	5001706	+	NA	NA	NA	NA	NA	NA	R	G	G	G	G	G	G	A	G	G	G	G	G	G	G	G	G	R	G	G	G	G	G	G	G	G	G	G	G	G	G	G	G	A	G	G	G	G	G
S1B_5001751	C/A	1B	5001751	+	NA	NA	NA	NA	NA	NA	C	C	A	C	C	C	C	C	C	C	C	C	C	C	C	A	C	C	A	A	C	C	C	C	C	C	A	C	C	A	C	C	C	C	C	C	C	C	C
S1B_6474015	C/T	1B	6474015	+	NA	NA	NA	NA	NA	NA	C	C	T	C	C	C	C	C	C	C	C	C	C	C	N	T	C	C	T	T	C	C	C	C	N	C	T	N	C	T	C	C	C	C	C	C	C	N	C
S1B_6474022	C/T	1B	6474022	+	NA	NA	NA	NA	NA	NA	Y	C	T	C	C	C	C	Y	C	C	T	C	C	C	N	T	C	C	T	T	C	T	C	Y	N	C	T	N	T	T	C	C	T	C	Y	C	C	N	C
S1B_6474600	C/T	1B	6474600	+	NA	NA	NA	NA	NA	NA	Y	C	N	T	C	T	C	C	T	T	C	C	C	C	T	N	T	C	N	N	C	C	T	C	T	C	N	C	C	N	C	C	C	C	C	C	C	C	C
S1B_6754918	A/G	1B	6754918	+	NA	NA	NA	NA	NA	NA	R	R	N	R	R	R	R	G	R	R	A	A	A	R	R	A	R	G	A	A	A	G	R	A	R	R	A	A	R	A	A	R	R	R	A	A	R	R	R
S1B_6754927	A/G	1B	6754927	+	NA	NA	NA	NA	NA	NA	R	R	N	R	R	R	R	G	R	R	A	A	A	R	R	A	R	G	A	A	A	G	R	A	R	R	A	A	R	A	A	R	R	R	A	A	R	R	R
S1B_6756144	C/T	1B	6756144	+	NA	NA	NA	NA	NA	NA	C	C	T	C	C	C	C	C	C	C	C	C	C	C	C	T	C	C	T	T	C	C	C	C	C	C	N	C	C	T	C	N	C	C	C	C	C	C	C
S1B_6756178	C/A	1B	6756178	+	NA	NA	NA	NA	NA	NA	C	A	C	M	C	A	A	C	A	A	A	A	C	C	M	C	A	C	C	C	A	C	A	M	A	C	N	C	A	C	C	N	A	C	A	M	C	C	C
S1B_6758683	T/A	1B	6758683	+	NA	NA	NA	NA	NA	NA	A	T	T	T	T	T	T	A	T	T	T	T	T	N	N	T	T	W	T	T	T	T	T	T	T	T	T	T	T	T	T	T	T	N	T	T	T	T	W
S1B_6782701	G/A	1B	6782701	+	NA	NA	NA	NA	NA	NA	R	R	G	G	G	G	R	G	G	G	G	R	G	G	G	G	G	G	G	G	G	R	G	G	G	G	G	G	G	G	G	R	G	G	G	G	R	G	G
S1B_6866914	A/T	1B	6866914	+	NA	NA	NA	NA	NA	NA	A	A	A	A	W	A	A	A	A	A	A	A	W	W	A	A	A	W	A	A	A	A	A	A	A	W	A	W	A	A	A	A	A	A	A	W	A	W	A
S1B_7230754	G/C	1B	7230754	+	NA	NA	NA	NA	NA	NA	N	G	N	S	C	N	G	G	G	G	N	G	C	C	C	G	G	S	G	G	N	G	G	S	N	C	G	C	G	G	C	N	N	G	C	C	C	C	C
S1B_7230779	C/T	1B	7230779	+	NA	NA	NA	NA	NA	NA	N	C	N	Y	T	N	C	C	C	C	N	C	T	T	T	C	C	Y	C	C	N	C	C	Y	N	T	C	T	C	C	T	N	N	C	T	T	T	T	T
S1B_7232629	C/T	1B	7232629	+	NA	NA	NA	NA	NA	NA	Y	T	C	C	C	N	T	C	C	C	T	T	C	C	C	C	C	C	C	C	T	N	C	C	C	C	C	C	T	C	C	T	T	N	T	C	Y	C	C
S1B_7254974	T/G	1B	7254974	+	NA	NA	NA	NA	NA	NA	G	K	T	K	T	G	T	G	G	G	T	T	T	K	T	T	G	K	T	N	T	N	G	T	G	T	T	T	N	N	T	T	T	T	T	T	T	T	T
S1B_7552381	C/T	1B	7552381	+	NA	NA	NA	NA	NA	NA	C	C	C	Y	C	Y	C	Y	Y	T	C	C	C	C	C	C	Y	Y	C	C	C	C	C	C	Y	C	C	N	C	C	C	C	C	C	C	C	C	C	C
S1B_7552392	G/A	1B	7552392	+	NA	NA	NA	NA	NA	NA	G	G	G	R	G	R	G	R	R	A	G	G	G	G	G	G	R	R	G	G	G	G	G	G	R	G	G	N	G	G	G	G	G	G	G	G	G	G	G
S1B_7990324	C/G	1B	7990324	+	NA	NA	NA	NA	NA	NA	S	C	C	C	C	C	C	G	C	C	S	C	N	C	N	C	C	C	C	C	C	G	C	C	C	C	C	N	S	C	N	C	S	C	S	N	C	C	C
S1B_7990331	G/A	1B	7990331	+	NA	NA	NA	NA	NA	NA	G	G	R	G	G	G	G	G	G	G	G	G	N	R	N	R	G	R	G	R	G	G	R	G	G	R	R	N	G	R	N	G	G	R	G	N	R	R	R
S1B_7990346	G/A	1B	7990346	+	NA	NA	NA	NA	NA	NA	G	G	G	R	A	G	G	G	G	G	G	G	N	R	N	G	G	R	G	G	G	G	R	R	G	R	G	N	G	G	N	G	R	R	G	N	R	R	R
S1B_7990354	G/A	1B	7990354	+	NA	NA	NA	NA	NA	NA	G	G	G	R	A	G	G	G	G	G	G	G	N	R	N	G	G	R	G	G	G	G	R	R	G	R	G	N	G	G	N	G	R	R	G	N	R	R	R
S1B_8181483	C/T	1B	8181483	+	NA	NA	NA	NA	NA	NA	T	N	C	T	C	N	C	T	Y	C	C	C	T	C	T	C	T	T	C	C	C	T	N	C	T	C	C	N	C	C	T	C	C	C	C	T	C	C	C
S1B_8569709	G/A	1B	8569709	+	NA	NA	NA	NA	NA	NA	G	A	G	G	A	G	A	G	N	N	G	A	G	A	A	G	G	G	G	G	A	G	G	G	G	A	G	G	G	G	G	A	G	A	G	G	A	A	G
S1B_9007043	A/G	1B	9007043	+	NA	NA	NA	NA	NA	NA	A	A	A	R	A	R	A	A	R	A	A	R	A	A	N	A	A	R	A	A	A	R	A	R	R	R	A	A	R	A	A	A	A	A	A	A	A	A	R
S1B_9082155	T/C	1B	9082155	+	NA	NA	NA	NA	NA	NA	T	C	C	T	T	T	C	T	T	T	T	C	T	T	T	C	T	T	C	C	C	T	T	Y	T	T	C	T	N	C	T	C	N	T	T	T	Y	T	Y
S1B_9097581	C/G	1B	9097581	+	NA	NA	NA	NA	NA	NA	C	S	S	C	C	C	S	C	C	C	C	S	C	C	C	S	C	C	S	S	S	C	C	S	C	C	S	N	C	S	C	S	C	N	C	C	C	C	S
S1B_9263384	G/A	1B	9263384	+	NA	NA	NA	NA	NA	NA	G	G	R	G	G	G	G	G	G	G	G	G	G	G	G	R	G	G	R	R	G	G	G	R	G	G	R	N	G	R	G	G	G	G	G	G	G	G	G
S1B_9571857	T/C	1B	9571857	+	NA	NA	NA	NA	NA	NA	C	T	T	Y	C	T	T	C	C	C	C	T	C	C	C	T	T	C	T	T	T	C	T	C	T	T	T	C	C	T	C	T	C	C	C	Y	Y	C	T
S1B_9571869	G/A	1B	9571869	+	NA	NA	NA	NA	NA	NA	G	G	G	G	G	G	G	G	G	G	G	G	G	G	G	G	G	G	G	G	G	G	G	G	G	G	G	G	G	G	G	G	G	G	G	G	G	G	G
S1B_9571874	C/T	1B	9571874	+	NA	NA	NA	NA	NA	NA	T	C	C	Y	T	C	C	T	T	T	T	C	T	T	T	C	C	T	C	C	C	T	C	T	C	C	C	T	T	C	T	C	T	T	T	Y	Y	T	C
S1B_9798970	T/C	1B	9798970	+	NA	NA	NA	NA	NA	NA	N	T	T	Y	C	N	T	C	Y	C	C	T	C	C	N	T	T	C	T	T	T	C	T	Y	T	T	T	T	C	T	Y	N	C	C	N	Y	Y	C	T
S1B_9933450	G/A	1B	9933450	+	NA	NA	NA	NA	NA	NA	G	G	R	R	G	R	G	G	G	G	G	G	G	G	G	G	A	G	R	R	G	G	R	R	R	G	R	G	G	R	G	G	G	G	G	G	G	G	R
S1B_9941436	A/G	1B	9941436	+	NA	NA	NA	NA	NA	NA	G	A	A	R	N	A	A	G	A	G	G	A	G	G	G	A	A	G	A	A	A	G	A	R	A	G	A	R	G	A	G	A	G	G	G	G	R	G	R
S1B_10086248	C/T	1B	10086248	+	NA	NA	NA	NA	NA	NA	C	C	C	C	C	C	C	C	C	C	C	C	T	T	C	C	C	C	C	C	C	C	N	C	N	N	C	C	C	C	T	C	C	C	Y	Y	C	T	C
S1B_11408550	A/C	1B	11408550	+	NA	NA	NA	NA	NA	NA	A	A	A	A	A	A	A	A	A	A	A	A	A	A	A	A	A	A	A	A	A	A	M	A	M	C	A	A	A	A	A	A	A	A	A	A	A	M	M
S1B_12387903	G/A	1B	12387903	+	NA	NA	NA	NA	NA	NA	G	G	R	R	G	R	G	G	G	G	G	G	R	R	R	R	R	G	R	R	G	G	R	G	G	N	R	G	G	R	R	G	G	G	R	R	G	R	R
S1B_12387954	G/C	1B	12387954	+	NA	NA	NA	NA	NA	NA	S	G	G	G	S	G	G	S	S	G	G	G	G	G	G	G	G	S	G	G	G	S	G	G	G	N	G	G	G	G	G	G	G	G	G	G	S	G	G
S1B_12387997	G/T	1B	12387997	+	NA	NA	NA	NA	NA	NA	K	G	G	G	K	G	G	K	G	G	G	G	G	G	G	G	G	K	G	G	G	K	G	G	G	N	G	G	G	G	G	G	G	G	G	G	K	G	G
S1B_12388004	C/T	1B	12388004	+	NA	NA	NA	NA	NA	NA	Y	C	C	C	Y	C	C	Y	C	C	C	C	C	C	C	C	C	Y	C	C	C	Y	C	C	C	N	C	C	C	C	C	C	C	C	C	C	Y	C	C
S1B_12432416	T/C	1B	12432416	+	NA	NA	NA	NA	NA	NA	T	T	Y	Y	T	N	T	T	T	T	T	T	Y	C	T	Y	Y	T	C	Y	T	T	C	T	Y	N	N	N	T	C	C	T	T	T	T	Y	T	Y	Y
S1B_12778961	C/T	1B	12778961	+	NA	NA	NA	NA	NA	NA	T	C	C	Y	T	C	C	T	T	T	T	C	N	C	N	C	C	Y	C	C	C	T	C	Y	C	N	C	C	T	C	C	C	T	T	T	C	T	C	C
S1B_12787610	T/C	1B	12787610	+	NA	NA	NA	NA	NA	NA	N	T	T	Y	C	T	T	C	C	C	C	T	C	T	C	T	T	Y	N	T	T	C	Y	Y	T	T	T	C	C	T	T	T	C	C	C	C	C	T	T
S1B_13000256	C/T	1B	13000256	+	NA	NA	NA	NA	NA	NA	N	C	C	C	T	C	C	T	C	C	C	C	C	C	C	C	C	T	C	C	C	T	C	C	C	N	C	C	C	C	C	C	C	C	C	C	C	C	C
S1B_13019876	G/T	1B	13019876	+	NA	NA	NA	NA	NA	NA	T	T	G	T	T	N	T	T	N	T	T	T	G	G	G	G	G	T	G	G	T	T	G	K	G	T	G	K	T	G	K	T	N	T	K	K	T	G	K
S1B_13242570	C/G	1B	13242570	+	NA	NA	NA	NA	NA	NA	G	C	C	C	N	C	C	N	C	C	G	C	C	S	C	C	C	N	C	C	C	N	C	C	C	N	C	S	N	C	C	C	G	N	S	C	N	C	C
S1B_13451122	C/A	1B	13451122	+	NA	NA	NA	NA	NA	NA	M	C	C	M	M	C	C	M	C	N	A	C	C	C	C	C	C	C	C	C	C	C	M	M	C	N	C	M	N	C	M	C	A	N	C	C	C	M	C
S1B_13893593	C/G	1B	13893593	+	NA	NA	NA	NA	NA	NA	S	N	C	S	S	C	C	S	C	C	S	N	C	G	C	C	C	S	C	C	N	C	S	C	S	C	N	G	C	C	G	N	S	C	S	C	C	S	C
S1B_13893596	T/C	1B	13893596	+	NA	NA	NA	NA	NA	NA	Y	N	T	C	C	T	T	C	Y	C	C	N	T	C	Y	T	T	C	T	T	N	T	Y	Y	Y	C	N	C	C	T	C	N	C	C	C	T	C	Y	Y
S1B_13894566	A/G	1B	13894566	+	NA	NA	NA	NA	NA	NA	A	R	R	A	A	R	A	A	R	R	R	A	A	A	R	R	A	R	R	R	A	A	A	R	R	N	R	A	A	R	R	R	R	A	R	R	A	R	R
S1B_14148832	C/G	1B	14148832	+	NA	NA	NA	NA	NA	NA	S	C	C	C	G	C	C	S	N	G	C	C	C	C	S	C	C	G	C	C	N	C	C	C	C	N	N	C	C	C	C	C	C	C	C	C	S	C	C
S1B_14440958	C/A	1B	14440958	+	NA	NA	NA	NA	NA	NA	C	C	C	C	C	C	C	C	M	M	M	M	N	M	C	C	M	C	C	N	C	C	C	C	C	C	N	C	C	C	A	C	C	M	M	C	C	C	N
S1B_14779960	C/T	1B	14779960	+	NA	NA	NA	NA	NA	NA	Y	N	C	C	C	C	N	Y	Y	T	Y	N	C	C	C	C	C	Y	C	C	T	C	C	Y	C	N	C	C	C	C	C	N	Y	Y	Y	C	C	C	C
S1B_14950068	A/G	1B	14950068	+	NA	NA	NA	NA	NA	NA	A	R	A	A	A	A	R	A	A	A	A	R	A	A	A	A	A	A	A	A	R	A	A	A	A	G	A	R	A	A	R	R	A	A	A	R	R	A	R
S1B_14996879	G/A	1B	14996879	+	NA	NA	NA	NA	NA	NA	G	R	G	G	G	G	R	G	N	G	G	G	N	G	N	G	G	G	N	G	R	G	G	G	N	G	G	G	G	G	R	G	G	G	G	N	G	G	G
S1B_15000517	G/A	1B	15000517	+	NA	NA	NA	NA	NA	NA	G	G	G	G	G	N	G	G	G	N	A	G	G	G	G	G	G	G	N	G	G	G	G	A	G	G	N	G	R	N	G	G	A	G	R	G	G	G	G
S1B_15032886	C/T	1B	15032886	+	NA	NA	NA	NA	NA	NA	Y	C	T	Y	C	T	C	Y	Y	C	C	C	C	C	C	T	T	C	T	T	C	T	T	Y	T	C	T	C	Y	T	C	C	C	C	C	C	C	C	Y
S1B_15099323	C/T	1B	15099323	+	NA	NA	NA	NA	NA	NA	C	T	C	C	C	C	T	C	C	C	C	T	C	C	C	C	C	C	C	C	T	C	C	C	C	C	C	Y	C	C	T	T	C	C	C	C	Y	C	C
S1B_15099333	G/C	1B	15099333	+	NA	NA	NA	NA	NA	NA	G	C	G	G	G	G	C	G	G	G	G	C	G	G	G	G	G	G	G	G	C	G	G	G	G	G	G	S	G	G	C	C	G	G	G	G	S	G	G
S1B_15099360	C/T	1B	15099360	+	NA	NA	NA	NA	NA	NA	T	C	C	Y	C	T	C	Y	C	C	C	C	T	C	Y	C	T	Y	C	C	C	C	T	Y	T	C	C	Y	T	C	C	C	C	C	T	T	C	C	Y
S1B_15207177	A/G	1B	15207177	+	NA	NA	NA	NA	NA	NA	A	A	A	A	A	R	A	A	R	A	N	A	A	A	N	A	R	A	A	A	A	A	R	R	R	A	N	A	R	A	A	A	A	A	A	A	A	A	R
S1B_15382768	A/C	1B	15382768	+	NA	NA	NA	NA	NA	NA	M	A	N	A	M	A	A	M	N	C	N	A	M	A	M	N	A	A	A	N	A	C	N	C	A	A	C	N	C	N	M	N	A	A	M	M	C	N	N
S1B_15382771	T/C	1B	15382771	+	NA	NA	NA	NA	NA	NA	Y	T	N	T	Y	T	T	Y	N	C	N	T	Y	T	Y	N	T	T	T	N	T	C	N	C	T	T	C	N	C	N	Y	N	T	T	Y	Y	C	N	N
S1B_15393034	C/G	1B	15393034	+	NA	NA	NA	NA	NA	NA	S	G	G	S	C	C	G	G	C	C	C	G	C	G	C	G	C	G	G	G	G	G	C	C	C	N	G	C	C	G	S	G	C	G	C	C	S	G	C
S1B_15435335	C/T	1B	15435335	+	NA	NA	NA	NA	NA	NA	C	C	C	C	N	C	C	N	N	N	C	C	Y	N	C	C	N	C	C	C	C	C	T	C	T	N	C	C	C	C	C	C	C	N	C	C	C	T	C
S1B_15435371	G/A	1B	15435371	+	NA	NA	NA	NA	NA	NA	A	R	A	G	N	G	G	N	N	N	G	G	G	N	A	A	N	A	A	A	G	A	G	R	G	N	A	G	G	A	G	G	G	N	R	R	G	G	A
S1B_15435372	C/G	1B	15435372	+	NA	NA	NA	NA	NA	NA	G	S	G	C	N	C	C	N	N	N	C	C	C	N	G	G	N	G	G	G	C	G	C	S	C	N	G	C	C	G	C	C	C	N	S	S	C	C	G
S1B_15439365	C/T	1B	15439365	+	NA	NA	NA	NA	NA	NA	C	C	C	C	Y	C	C	C	C	C	C	C	Y	C	T	C	C	C	C	C	C	C	C	Y	C	N	C	Y	Y	C	Y	C	Y	C	Y	Y	Y	C	C
S1B_15439376	C/G	1B	15439376	+	NA	NA	NA	NA	NA	NA	C	C	C	C	S	C	C	C	C	C	C	C	S	C	G	C	C	C	C	C	C	C	C	S	C	N	C	S	S	C	S	C	S	C	S	S	S	C	C
S1B_15439388	A/C	1B	15439388	+	NA	NA	NA	NA	NA	NA	A	A	A	A	M	A	A	A	A	A	A	A	M	A	C	A	A	A	A	A	A	A	A	M	A	N	A	M	M	A	M	A	M	A	M	M	M	A	A
S1B_15658769	G/C	1B	15658769	+	NA	NA	NA	NA	NA	NA	C	G	G	G	C	G	G	G	G	G	G	G	C	G	C	G	N	G	G	G	G	G	G	S	G	N	G	S	S	N	C	G	C	G	C	C	C	N	G
S1B_15659724	C/T	1B	15659724	+	NA	NA	NA	NA	NA	NA	C	C	C	Y	C	T	C	C	C	N	T	C	C	C	C	Y	T	C	C	C	C	N	T	N	T	N	N	C	C	C	C	C	C	N	C	C	C	C	T
S1B_16427196	G/C	1B	16427196	+	NA	NA	NA	NA	NA	NA	N	S	G	S	G	C	G	G	G	G	G	S	G	S	G	S	S	C	S	S	G	S	S	C	C	C	C	G	C	S	G	N	G	N	N	G	G	S	S
S1B_16427210	G/A	1B	16427210	+	NA	NA	NA	NA	NA	NA	N	R	G	R	G	A	G	G	G	G	G	R	G	R	G	R	R	A	R	R	G	R	R	A	A	R	A	G	A	R	G	N	G	N	N	G	G	R	R
S1B_16427221	T/C	1B	16427221	+	NA	NA	NA	NA	NA	NA	N	Y	T	Y	T	C	T	T	T	T	T	Y	T	Y	T	Y	Y	C	Y	Y	T	Y	Y	C	C	Y	C	T	C	Y	T	N	T	N	N	T	T	Y	Y
S1B_16427768	A/G	1B	16427768	+	NA	NA	NA	NA	NA	NA	G	A	A	A	G	N	A	A	A	A	A	A	A	A	A	A	A	A	A	A	A	G	A	G	A	N	A	A	R	A	A	A	G	A	R	A	G	A	A
S1B_16431669	G/A	1B	16431669	+	NA	NA	NA	NA	NA	NA	G	G	G	R	G	N	G	G	R	G	A	G	G	G	G	G	A	G	G	G	G	G	A	A	A	N	G	G	R	G	G	G	G	G	G	G	G	G	N
S1B_16431678	A/G	1B	16431678	+	NA	NA	NA	NA	NA	NA	A	A	A	R	A	N	A	A	R	A	G	R	G	A	G	A	G	A	A	A	A	A	G	G	G	N	A	A	R	A	A	A	A	A	A	G	A	A	N
S1B_16431703	A/G	1B	16431703	+	NA	NA	NA	NA	NA	NA	A	A	A	R	A	N	A	A	R	A	G	R	G	A	G	A	G	A	A	A	A	A	G	G	G	N	A	A	R	A	A	A	A	A	A	G	A	A	N
S1B_16631931	G/C	1B	16631931	+	NA	NA	NA	NA	NA	NA	G	G	G	G	N	G	G	G	G	G	G	G	S	G	C	G	G	G	G	G	G	N	G	G	G	N	G	S	G	N	C	G	G	G	S	C	N	G	G
S1B_16631958	T/G	1B	16631958	+	NA	NA	NA	NA	NA	NA	G	T	T	T	N	T	T	G	G	G	T	T	K	G	T	T	T	G	T	T	T	N	T	G	T	N	T	K	K	N	T	T	G	T	K	T	N	G	T
S1B_16631965	G/C	1B	16631965	+	NA	NA	NA	NA	NA	NA	G	G	G	S	N	C	G	G	G	G	C	G	S	G	C	G	C	G	G	G	G	N	C	G	C	N	G	S	S	N	C	G	G	G	S	C	N	G	C
S1B_16918972	A/G	1B	16918972	+	NA	NA	NA	NA	NA	NA	A	A	G	A	A	A	A	A	A	A	A	A	A	A	A	G	A	A	G	G	A	A	A	A	A	A	N	A	A	G	A	A	A	A	A	A	A	A	A
S1B_17385910	C/T	1B	17385910	+	NA	NA	NA	NA	NA	NA	C	Y	C	C	Y	Y	Y	C	C	C	Y	Y	T	Y	T	Y	Y	C	C	C	T	C	C	Y	C	Y	C	T	Y	C	T	Y	Y	C	Y	T	C	C	C
S1B_17621910	G/A	1B	17621910	+	NA	NA	NA	NA	NA	NA	R	G	G	G	R	R	G	R	G	R	R	G	G	G	G	G	R	G	R	G	G	R	G	R	R	G	R	G	R	G	G	G	R	G	R	G	R	G	G
S1B_17789276	G/A	1B	17789276	+	NA	NA	NA	NA	NA	NA	G	G	G	G	G	G	G	G	G	G	G	G	A	G	A	G	G	G	G	G	A	A	G	R	G	N	G	G	A	G	G	G	A	G	A	A	G	G	N
S1B_17789291	T/G	1B	17789291	+	NA	NA	NA	NA	NA	NA	G	T	T	K	G	T	T	G	G	G	T	T	T	G	T	T	T	G	T	T	T	G	T	T	T	N	T	T	T	T	T	T	T	G	T	T	K	G	N
S1B_17789309	G/A	1B	17789309	+	NA	NA	NA	NA	NA	NA	G	G	G	G	G	G	G	G	G	G	G	G	A	G	A	G	G	G	G	G	A	G	G	G	G	N	G	G	G	G	G	G	G	G	G	A	G	G	N
S1B_17815148	A/T	1B	17815148	+	NA	NA	NA	NA	NA	NA	A	W	A	W	T	A	A	A	A	N	A	A	A	A	N	A	A	W	A	A	W	T	A	W	N	W	A	A	T	A	A	A	A	W	A	A	W	A	T
S1B_17815170	G/A	1B	17815170	+	NA	NA	NA	NA	NA	NA	G	R	G	R	A	G	G	G	G	N	G	G	G	G	N	G	G	R	G	G	R	A	G	R	N	R	G	G	A	G	G	G	G	R	G	G	R	G	A
S1B_17815181	C/T	1B	17815181	+	NA	NA	NA	NA	NA	NA	C	Y	C	Y	T	C	C	C	C	N	C	C	C	C	N	C	C	Y	C	C	Y	T	C	Y	N	Y	C	C	T	C	C	C	C	Y	C	C	Y	C	T
S1B_17816558	C/T	1B	17816558	+	NA	NA	NA	NA	NA	NA	T	C	C	C	C	C	C	T	C	C	C	C	C	C	C	C	C	T	C	C	C	T	C	Y	C	N	C	C	C	C	C	N	N	C	T	C	C	C	C
S1B_17890932	G/A	1B	17890932	+	NA	NA	NA	NA	NA	NA	R	R	R	R	R	R	R	G	R	R	R	R	G	R	G	R	R	G	R	R	G	G	R	R	R	G	G	R	G	R	G	R	G	R	G	G	R	R	R
S1B_17890935	G/A	1B	17890935	+	NA	NA	NA	NA	NA	NA	R	R	R	G	G	G	G	G	G	G	G	G	G	G	G	R	G	G	G	G	R	G	G	G	G	G	G	G	G	G	R	R	G	G	G	G	G	G	G
S1B_17891004	C/T	1B	17891004	+	NA	NA	NA	NA	NA	NA	Y	C	C	Y	C	C	Y	T	Y	C	C	C	T	C	T	C	C	Y	C	Y	T	T	C	Y	C	C	Y	T	Y	Y	Y	C	T	C	T	Y	C	C	Y
S1B_17891011	G/A	1B	17891011	+	NA	NA	NA	NA	NA	NA	R	G	G	R	G	G	R	A	R	G	G	G	A	G	A	G	G	R	G	R	A	A	G	R	G	G	R	A	R	R	R	G	A	G	A	R	G	G	R
S1B_18355335	G/C	1B	18355335	+	NA	NA	NA	NA	NA	NA	G	G	G	S	G	G	G	C	G	G	G	G	N	C	N	G	G	C	G	G	N	C	G	G	G	N	G	G	G	G	G	G	N	C	N	G	G	C	G
S1B_18355369	A/G	1B	18355369	+	NA	NA	NA	NA	NA	NA	A	G	A	R	A	A	G	G	A	A	A	G	N	G	N	A	A	G	A	A	N	G	A	A	A	N	A	G	A	A	G	G	N	G	N	G	R	G	A
S1B_18355376	C/T	1B	18355376	+	NA	NA	NA	NA	NA	NA	C	C	C	Y	C	C	C	T	C	C	C	C	N	T	N	C	C	T	C	C	N	T	C	C	C	N	C	C	C	C	C	C	N	T	N	C	C	T	C
S1B_18570811	A/G	1B	18570811	+	NA	NA	NA	NA	NA	NA	A	A	A	A	A	A	A	A	A	A	A	A	N	A	G	A	A	A	A	A	N	A	N	R	A	N	A	A	G	A	A	A	G	A	R	A	A	A	A
S1B_18683589	T/C	1B	18683589	+	NA	NA	NA	NA	NA	NA	Y	Y	Y	Y	Y	Y	Y	T	Y	Y	Y	Y	T	T	T	Y	Y	T	Y	Y	T	T	Y	Y	Y	T	Y	T	T	Y	T	Y	T	T	Y	T	Y	T	Y
S1B_18683593	C/G	1B	18683593	+	NA	NA	NA	NA	NA	NA	S	S	S	S	G	S	S	C	G	G	S	S	C	C	C	S	S	C	S	S	C	C	S	S	S	C	S	C	C	S	C	S	C	C	S	C	S	C	S
S1B_18683599	C/T	1B	18683599	+	NA	NA	NA	NA	NA	NA	Y	Y	Y	Y	Y	Y	Y	C	Y	Y	Y	Y	C	C	C	Y	Y	C	Y	Y	C	C	Y	Y	Y	C	Y	C	C	Y	C	Y	C	C	Y	C	Y	C	Y
S1B_18683631	C/T	1B	18683631	+	NA	NA	NA	NA	NA	NA	C	C	C	C	C	C	C	C	C	C	C	C	Y	C	C	C	C	C	C	C	Y	C	C	C	C	C	C	Y	C	C	Y	C	C	C	C	Y	C	C	C
S1B_19620230	C/T	1B	19620230	+	NA	NA	NA	NA	NA	NA	Y	C	C	C	Y	C	C	Y	Y	Y	T	C	N	N	C	C	Y	C	Y	C	N	Y	Y	Y	Y	T	C	C	Y	N	C	C	T	Y	C	C	Y	Y	Y
S1B_19887849	C/T	1B	19887849	+	NA	NA	NA	NA	NA	NA	C	C	C	C	C	C	C	C	C	C	C	C	N	C	T	C	C	C	C	C	N	C	C	C	N	N	C	N	C	C	N	C	C	C	C	N	C	C	N
S1B_19887852	G/A	1B	19887852	+	NA	NA	NA	NA	NA	NA	R	G	G	R	G	G	G	A	G	G	G	G	N	R	G	G	G	R	G	G	N	R	G	G	N	N	G	N	G	G	N	G	G	A	G	N	G	R	N
S1B_19946902	C/T	1B	19946902	+	NA	NA	NA	NA	NA	NA	C	C	Y	C	C	C	C	C	C	N	C	N	N	C	N	C	Y	C	Y	C	C	C	C	N	N	N	C	C	Y	Y	C	C	C	C	C	C	C	C	Y
S1B_20033544	G/A	1B	20033544	+	NA	NA	NA	NA	NA	NA	G	R	R	G	R	R	R	G	G	G	G	G	A	G	N	G	G	G	R	G	G	R	R	G	G	R	G	G	G	R	N	R	G	R	R	R	G	G	R
S1B_20033545	C/T	1B	20033545	+	NA	NA	NA	NA	NA	NA	C	C	Y	C	C	Y	C	Y	C	C	Y	C	C	C	N	C	C	C	Y	C	C	Y	C	C	C	Y	C	Y	Y	Y	N	C	C	C	C	C	C	C	C
S1B_20033562	C/G	1B	20033562	+	NA	NA	NA	NA	NA	NA	C	S	S	C	S	S	S	C	C	C	C	C	G	C	N	C	C	C	S	C	C	S	S	C	C	S	C	C	C	S	N	S	C	S	S	S	C	C	S
S1B_20033565	C/T	1B	20033565	+	NA	NA	NA	NA	NA	NA	C	C	C	C	C	Y	C	C	C	C	C	Y	C	Y	N	C	C	Y	C	C	Y	C	C	C	Y	C	C	C	Y	C	N	Y	C	C	C	C	C	Y	C
S1B_20033577	C/G	1B	20033577	+	NA	NA	NA	NA	NA	NA	C	C	S	S	C	C	C	C	C	C	C	C	C	C	N	G	S	C	C	G	C	C	S	C	S	C	S	C	S	C	N	C	C	C	C	C	C	C	S
S1B_20033579	A/C	1B	20033579	+	NA	NA	NA	NA	NA	NA	A	M	M	A	M	M	M	A	A	A	A	A	C	A	N	A	A	A	M	A	A	M	M	A	A	M	A	A	A	M	N	M	A	M	M	M	A	A	M
S1B_20047941	G/A	1B	20047941	+	NA	NA	NA	NA	NA	NA	G	G	G	G	G	G	G	G	G	G	G	G	A	G	R	G	G	G	G	G	A	N	G	G	G	N	G	R	G	G	A	G	G	G	G	A	G	G	G
S1B_20047970	T/C	1B	20047970	+	NA	NA	NA	NA	NA	NA	T	T	T	T	T	T	T	T	T	T	T	T	T	T	Y	T	T	T	T	T	T	N	T	T	T	N	T	T	T	T	T	T	T	T	T	T	T	T	T
S1B_20047982	T/A	1B	20047982	+	NA	NA	NA	NA	NA	NA	T	T	T	T	T	T	T	T	T	T	T	T	A	T	W	T	T	T	T	T	A	N	T	T	T	N	T	W	T	T	A	T	T	T	T	A	T	T	T
S1B_20173024	G/A	1B	20173024	+	NA	NA	NA	NA	NA	NA	G	G	G	G	A	G	G	N	G	G	G	G	G	G	G	G	G	G	G	G	G	G	G	G	G	R	G	A	G	G	A	G	G	A	G	G	G	G	G
S1B_20836349	G/C	1B	20836349	+	NA	NA	NA	NA	NA	NA	G	G	G	G	G	G	G	G	G	G	G	G	C	G	S	G	G	G	G	G	C	G	G	G	G	C	G	S	G	G	S	G	G	G	S	C	G	G	S
S1B_20836364	G/T	1B	20836364	+	NA	NA	NA	NA	NA	NA	G	G	G	G	G	G	G	G	G	G	G	G	T	G	K	G	G	G	G	G	T	G	G	G	G	G	G	K	G	G	K	G	G	G	K	T	G	G	G
S1B_21354626	G/C	1B	21354626	+	NA	NA	NA	NA	NA	NA	G	N	G	G	G	G	N	G	G	G	G	G	S	G	S	G	G	G	G	G	S	G	G	G	N	G	G	G	G	G	G	N	G	G	G	S	G	G	G
S1B_21354637	C/G	1B	21354637	+	NA	NA	NA	NA	NA	NA	C	N	C	C	C	C	N	C	C	C	C	C	S	C	S	C	C	C	C	C	S	C	C	C	N	C	C	C	C	C	C	N	C	C	C	S	C	C	C
S1B_21474665	C/A	1B	21474665	+	NA	NA	NA	NA	NA	NA	C	C	A	A	C	A	C	C	M	C	A	C	N	C	N	A	A	C	A	A	N	C	A	M	A	N	A	C	M	A	C	C	C	C	C	C	C	C	A
S1B_21806809	A/G	1B	21806809	+	NA	NA	NA	NA	NA	NA	G	A	A	R	G	A	A	G	G	G	A	A	N	A	N	A	A	R	A	A	G	G	A	G	A	G	A	A	A	A	N	A	G	G	R	A	R	A	R
S1B_22056734	T/A	1B	22056734	+	NA	NA	NA	NA	NA	NA	A	T	T	W	A	N	T	A	W	A	T	T	N	A	N	T	T	A	T	T	N	A	T	W	T	N	T	T	T	T	T	T	A	A	W	T	W	N	T
S1B_22264151	G/C	1B	22264151	+	NA	NA	NA	NA	NA	NA	G	G	G	S	S	S	G	G	C	C	G	G	C	S	S	G	S	G	N	G	N	G	C	G	G	N	N	C	G	N	S	N	G	G	N	C	S	C	N
S1B_22264180	G/T	1B	22264180	+	NA	NA	NA	NA	NA	NA	G	G	G	K	K	K	G	G	T	T	G	G	T	K	K	G	K	G	N	G	N	G	T	G	G	N	N	T	G	N	K	N	G	G	N	T	K	T	N
S1B_22701290	A/G	1B	22701290	+	NA	NA	NA	NA	NA	NA	A	A	A	R	R	A	A	A	A	A	A	A	A	R	R	A	A	R	A	A	A	A	A	A	A	R	A	A	A	A	A	A	R	A	R	A	R	R	A
S1B_22803639	T/C	1B	22803639	+	NA	NA	NA	NA	NA	NA	Y	T	T	Y	T	T	T	T	T	T	T	Y	N	C	N	T	T	C	T	T	N	C	T	Y	T	N	T	T	Y	T	N	T	C	C	Y	T	T	C	T
S1B_22977976	A/G	1B	22977976	+	NA	NA	NA	NA	NA	NA	R	R	R	R	R	R	R	R	A	R	R	R	N	A	A	R	R	A	G	R	N	A	R	A	R	A	R	G	R	A	G	R	A	N	R	A	R	A	A
S1B_22977993	G/T	1B	22977993	+	NA	NA	NA	NA	NA	NA	K	K	K	K	K	K	K	K	G	K	K	K	N	G	G	K	K	G	T	K	N	G	K	G	K	G	K	T	K	G	T	K	G	N	K	G	K	G	G
S1B_23899810	G/C	1B	23899810	+	NA	NA	NA	NA	NA	NA	G	S	G	G	C	G	S	G	G	G	S	G	S	S	G	G	G	G	G	G	C	G	G	G	G	G	G	G	G	G	G	S	S	S	S	S	S	G	G
S1B_23899860	T/C	1B	23899860	+	NA	NA	NA	NA	NA	NA	T	Y	T	T	C	T	Y	T	T	T	T	T	Y	T	T	T	T	T	T	T	T	T	T	T	T	T	T	T	T	T	T	Y	T	T	Y	Y	T	T	T
S1B_23899877	G/A	1B	23899877	+	NA	NA	NA	NA	NA	NA	R	G	G	R	A	G	R	G	R	R	R	R	G	R	N	G	G	G	G	G	A	G	G	G	G	G	G	R	G	G	A	R	R	R	R	R	R	G	N
S1B_23899889	A/G	1B	23899889	+	NA	NA	NA	NA	NA	NA	R	A	A	R	G	A	R	A	A	A	R	R	A	R	N	A	A	A	A	A	G	A	A	A	A	A	A	R	A	A	G	R	R	R	R	R	R	A	N
S1B_23899920	C/T	1B	23899920	+	NA	NA	NA	NA	NA	NA	C	C	C	C	C	C	C	C	C	C	Y	C	C	Y	N	C	C	C	C	C	C	C	C	C	C	C	C	C	C	C	C	C	Y	Y	Y	C	C	C	N
S1B_24003685	C/G	1B	24003685	+	NA	NA	NA	NA	NA	NA	S	C	C	C	S	S	C	S	S	S	S	N	S	C	S	S	C	S	C	C	C	S	C	S	S	S	S	S	C	S	S	S	C	S	S	C	S	C	C
S1B_24158106	C/G	1B	24158106	+	NA	NA	NA	NA	NA	NA	G	C	C	S	C	N	C	C	C	C	C	C	N	N	N	C	C	G	N	C	N	G	C	S	C	G	C	C	G	C	C	C	G	G	S	N	C	G	S
S1B_24223851	A/G	1B	24223851	+	NA	NA	NA	NA	NA	NA	G	A	A	R	G	A	A	R	R	G	A	A	N	G	G	A	A	G	A	A	N	G	A	R	A	G	A	A	R	A	A	A	G	G	A	A	G	G	R
S1B_24353883	C/T	1B	24353883	+	NA	NA	NA	NA	NA	NA	C	C	C	C	T	C	C	C	Y	T	C	C	N	C	C	C	C	C	C	C	N	C	C	C	C	C	C	C	C	C	C	C	C	C	C	C	T	C	C
S1B_24568937	G/A	1B	24568937	+	NA	NA	NA	NA	NA	NA	G	G	A	G	G	G	G	G	G	G	G	G	N	A	N	A	G	A	A	A	N	G	G	G	G	G	A	G	G	A	N	G	A	A	R	N	G	A	G
S1B_24736751	T/G	1B	24736751	+	NA	NA	NA	NA	NA	NA	T	T	G	G	T	T	T	T	T	T	T	T	N	G	G	G	T	N	G	G	N	T	T	K	T	T	G	T	T	G	T	T	G	G	K	N	T	G	T
S1B_24789937	G/C	1B	24789937	+	NA	NA	NA	NA	NA	NA	S	G	G	S	N	G	G	S	G	G	G	G	G	G	G	G	S	G	G	G	S	S	G	G	G	G	G	S	G	G	S	G	N	S	G	G	S	G	G
S1B_24789965	G/A	1B	24789965	+	NA	NA	NA	NA	NA	NA	R	G	G	R	N	G	G	R	G	G	G	G	G	G	G	G	R	G	G	G	R	R	G	G	G	G	G	R	G	G	R	G	N	R	G	G	R	G	G
S1B_24789974	C/A	1B	24789974	+	NA	NA	NA	NA	NA	NA	C	A	A	M	N	A	A	M	M	C	A	A	C	C	C	A	M	C	A	A	C	C	M	M	A	C	A	M	M	A	M	A	N	C	M	A	C	C	M
S1B_24932478	G/C	1B	24932478	+	NA	NA	NA	NA	NA	NA	S	G	G	S	C	G	G	G	S	C	G	G	G	C	G	G	G	C	G	G	G	C	G	S	G	C	G	G	S	G	G	G	C	C	S	G	C	C	S
S1B_25750241	T/C	1B	25750241	+	NA	NA	NA	NA	NA	NA	Y	T	T	Y	C	T	T	T	N	N	T	T	C	C	C	T	T	C	T	T	C	N	T	N	T	N	T	Y	T	T	N	T	C	C	Y	C	N	N	T
S1B_25750290	C/T	1B	25750290	+	NA	NA	NA	NA	NA	NA	C	C	C	C	T	C	C	C	N	N	C	C	T	C	T	C	C	Y	C	C	T	C	C	C	C	T	C	C	C	C	Y	C	C	C	Y	Y	N	C	C
S1B_25750300	C/G	1B	25750300	+	NA	NA	NA	NA	NA	NA	C	C	C	C	C	C	C	C	N	N	C	C	G	C	C	C	C	C	C	C	G	C	C	C	C	C	C	C	C	C	S	C	C	C	S	S	N	C	C
S1B_25750319	T/C	1B	25750319	+	NA	NA	NA	NA	NA	NA	Y	T	T	Y	C	T	T	T	N	N	T	Y	C	C	C	T	T	C	T	T	C	C	T	Y	T	C	T	T	T	T	Y	T	C	C	Y	Y	N	C	T
S1B_25750346	T/A	1B	25750346	+	NA	NA	NA	NA	NA	NA	T	T	T	T	A	T	T	T	N	N	T	T	T	T	A	T	T	W	T	T	T	T	T	T	T	A	T	T	T	T	T	T	T	T	T	T	N	T	T
S1B_25750447	G/A	1B	25750447	+	NA	NA	NA	NA	NA	NA	R	G	G	A	G	G	G	G	N	N	G	R	G	A	G	G	G	N	G	G	G	A	G	R	G	G	G	G	R	G	G	G	A	A	R	G	N	A	G
S1B_25946033	C/T	1B	25946033	+	NA	NA	NA	NA	NA	NA	C	Y	Y	Y	C	T	Y	Y	C	C	Y	Y	C	C	C	Y	Y	C	Y	Y	C	C	Y	C	Y	C	Y	Y	Y	Y	Y	Y	C	C	Y	Y	C	C	Y
S1B_26075844	C/T	1B	26075844	+	NA	NA	NA	NA	NA	NA	C	N	T	Y	C	T	T	T	C	C	N	N	C	C	N	T	T	C	N	C	C	C	T	C	N	C	T	Y	Y	T	C	T	C	C	Y	C	C	C	Y
S1B_26333630	G/A	1B	26333630	+	NA	NA	NA	NA	NA	NA	G	G	G	G	A	G	G	G	G	G	G	R	G	G	G	G	G	G	G	G	G	G	G	G	N	A	N	G	G	G	G	G	G	G	G	G	G	G	R
S1B_26397489	C/T	1B	26397489	+	NA	NA	NA	NA	NA	NA	C	Y	Y	Y	N	T	T	C	N	C	Y	Y	C	C	C	Y	Y	C	Y	C	C	C	Y	Y	N	C	Y	C	C	T	C	Y	C	C	C	C	C	C	C
S1B_26412955	C/T	1B	26412955	+	NA	NA	NA	NA	NA	NA	Y	C	C	C	C	C	C	Y	C	C	C	C	C	C	C	C	C	Y	C	C	C	C	C	C	C	C	C	C	C	C	C	C	C	C	C	C	C	C	C
S1B_26412982	C/T	1B	26412982	+	NA	NA	NA	NA	NA	NA	C	Y	T	C	C	Y	Y	C	C	C	C	C	C	C	C	C	C	C	Y	C	T	C	C	Y	C	C	C	C	C	C	T	T	C	C	T	C	C	C	C
S1B_26426305	C/G	1B	26426305	+	NA	NA	NA	NA	NA	NA	C	C	S	C	C	C	C	C	S	S	C	C	C	C	S	S	C	S	S	S	C	S	C	S	C	C	S	C	C	S	C	C	C	C	S	C	C	C	S
S1B_26447269	G/T	1B	26447269	+	NA	NA	NA	NA	NA	NA	G	N	G	G	T	G	G	G	G	G	N	K	G	G	N	K	G	G	K	K	K	N	G	G	G	G	N	G	G	T	N	T	G	G	N	K	N	G	G
S1B_26447282	G/A	1B	26447282	+	NA	NA	NA	NA	NA	NA	R	N	A	R	G	R	R	G	R	G	N	R	G	R	N	R	G	R	R	G	G	N	G	G	G	G	N	A	R	G	N	G	A	A	N	G	N	A	R
S1B_26447304	C/T	1B	26447304	+	NA	NA	NA	NA	NA	NA	Y	N	C	Y	C	Y	Y	T	Y	T	N	Y	T	Y	N	C	T	Y	Y	Y	Y	N	T	T	T	C	N	C	Y	C	N	C	C	C	N	Y	N	C	Y
S1B_26447305	G/A	1B	26447305	+	NA	NA	NA	NA	NA	NA	G	N	G	G	A	G	G	G	G	G	N	R	G	G	N	R	G	G	R	R	R	N	G	G	G	G	N	G	G	A	N	A	G	G	N	R	N	G	G
S1B_26591853	C/G	1B	26591853	+	NA	NA	NA	NA	NA	NA	C	C	N	C	C	C	C	N	C	C	C	C	G	G	S	C	N	C	C	C	G	N	N	N	C	C	C	S	C	C	G	C	C	C	C	S	C	G	C
S1B_26591858	G/C	1B	26591858	+	NA	NA	NA	NA	NA	NA	S	S	N	G	G	S	S	N	S	G	S	G	C	C	S	S	N	G	S	S	C	N	N	N	G	G	G	S	G	S	C	S	G	G	G	C	G	C	C
S1B_26591874	G/C	1B	26591874	+	NA	NA	NA	NA	NA	NA	S	S	N	G	G	S	S	N	S	G	S	G	C	C	S	S	N	G	S	S	C	N	N	N	G	G	G	S	G	S	C	S	G	G	G	C	G	C	C
S1B_26832157	C/T	1B	26832157	+	NA	NA	NA	NA	NA	NA	Y	C	C	C	T	C	C	C	N	T	C	Y	T	T	T	C	C	T	C	C	T	T	C	Y	C	T	C	C	C	C	C	C	T	T	C	T	N	T	N
S1B_26850361	T/C	1B	26850361	+	NA	NA	NA	NA	NA	NA	Y	T	T	Y	C	N	Y	T	T	N	T	Y	N	C	C	T	T	C	T	T	C	C	T	Y	T	C	T	Y	C	T	Y	T	C	C	C	T	C	N	T
S1B_26975215	G/T	1B	26975215	+	NA	NA	NA	NA	NA	NA	G	G	T	T	G	K	K	T	N	N	T	T	G	G	G	T	K	N	T	T	G	G	G	G	K	G	T	G	K	T	K	K	G	G	K	K	G	G	K
S1B_26975246	G/A	1B	26975246	+	NA	NA	NA	NA	NA	NA	G	G	A	A	G	R	R	A	N	N	A	A	G	G	G	A	R	N	A	A	G	G	G	G	R	G	A	G	R	A	R	R	G	G	R	R	G	G	R
S1B_27750167	T/C	1B	27750167	+	NA	NA	NA	NA	NA	NA	Y	T	T	T	C	T	T	T	T	T	T	T	C	C	C	T	T	Y	T	T	C	C	Y	Y	T	C	T	T	Y	T	C	T	C	C	C	C	C	C	Y
S1B_28041285	G/C	1B	28041285	+	NA	NA	NA	NA	NA	NA	G	G	G	S	C	G	G	G	G	G	G	G	C	C	C	G	G	S	G	G	C	C	C	S	G	C	G	G	S	G	S	G	C	C	S	S	C	C	S
S1B_28593253	T/A	1B	28593253	+	NA	NA	NA	NA	NA	NA	W	T	T	A	T	T	W	T	T	T	T	W	W	W	W	T	T	T	T	T	T	T	T	T	T	T	N	T	T	T	T	A	T	T	T	W	T	T	T
S1B_28765517	C/T	1B	28765517	+	NA	NA	NA	NA	NA	NA	Y	T	C	Y	C	T	Y	T	C	C	T	T	C	C	C	C	T	C	C	C	C	C	Y	C	T	C	C	T	N	C	Y	T	C	C	Y	Y	C	N	C
S1B_29205666	G/A	1B	29205666	+	NA	NA	NA	NA	NA	NA	G	G	R	G	G	G	G	G	G	G	G	G	G	G	G	R	G	G	R	R	G	G	G	G	G	G	R	G	G	R	G	G	G	G	G	G	G	G	G
S1B_29269991	G/A	1B	29269991	+	NA	NA	NA	NA	NA	NA	R	G	G	G	G	G	R	G	R	A	G	G	A	G	N	G	G	R	G	G	A	A	G	G	N	G	G	G	G	G	R	G	N	G	G	A	G	G	G
S1B_29270000	A/G	1B	29270000	+	NA	NA	NA	NA	NA	NA	R	A	A	R	G	A	R	A	R	G	A	A	G	G	N	A	A	G	A	A	G	G	R	R	N	G	A	A	R	A	R	A	N	G	A	G	G	G	R
S1B_29401880	A/C	1B	29401880	+	NA	NA	NA	NA	NA	NA	C	A	A	M	C	A	A	A	C	C	A	A	N	C	C	A	A	C	A	A	C	C	N	M	A	C	M	M	M	A	M	A	C	C	C	M	C	C	A
S1B_29413828	T/C	1B	29413828	+	NA	NA	NA	NA	NA	NA	C	T	T	T	T	T	T	N	C	C	T	T	C	T	Y	N	N	C	T	T	C	C	N	T	T	T	T	N	T	T	C	T	T	T	T	C	T	T	T
S1B_30394654	G/A	1B	30394654	+	NA	NA	NA	NA	NA	NA	G	G	G	R	A	N	G	G	R	A	G	G	G	G	N	G	G	A	G	G	G	G	G	R	N	G	G	G	R	G	G	G	A	A	A	G	A	G	G
S1B_30464964	A/T	1B	30464964	+	NA	NA	NA	NA	NA	NA	W	W	A	A	A	W	A	A	A	A	A	W	A	A	A	A	A	W	A	A	A	A	W	A	T	W	A	W	A	A	T	W	N	T	A	A	A	T	A
S1B_30696482	C/G	1B	30696482	+	NA	NA	NA	NA	NA	NA	C	S	S	S	G	S	C	S	S	S	C	C	C	C	S	S	C	S	S	S	C	N	S	C	C	C	C	C	C	G	C	S	C	S	C	C	C	C	C
S1B_30696500	G/A	1B	30696500	+	NA	NA	NA	NA	NA	NA	G	R	R	R	A	R	G	R	R	R	G	G	G	G	R	R	G	R	R	R	G	N	R	G	G	G	G	G	G	A	G	R	G	R	G	G	G	G	G
S1B_30718131	C/T	1B	30718131	+	NA	NA	NA	NA	NA	NA	C	C	C	Y	N	C	C	C	C	C	C	C	T	N	T	C	C	C	C	C	T	N	C	T	C	N	C	C	Y	C	Y	C	T	T	Y	T	C	N	C
S1B_30846976	G/T	1B	30846976	+	NA	NA	NA	NA	NA	NA	K	G	K	K	K	K	G	K	G	G	K	G	K	K	G	K	G	T	K	G	K	G	G	K	K	G	K	K	K	K	K	K	N	K	K	K	K	G	K
S1B_31739805	T/G	1B	31739805	+	NA	NA	NA	NA	NA	NA	T	K	T	T	T	K	T	T	T	T	T	K	T	T	T	T	T	T	T	T	K	T	T	T	T	T	T	T	T	T	T	T	T	T	T	K	K	T	T
S1B_31827104	T/C	1B	31827104	+	NA	NA	NA	NA	NA	NA	Y	C	C	Y	T	C	C	C	Y	T	C	C	T	T	T	C	N	T	C	C	T	T	Y	C	C	T	C	Y	Y	C	Y	C	T	T	T	T	T	T	Y
S1B_31827128	T/C	1B	31827128	+	NA	NA	NA	NA	NA	NA	Y	C	C	Y	T	C	C	C	Y	T	C	C	T	T	T	C	N	T	C	C	T	T	Y	C	C	T	C	Y	Y	C	Y	C	T	T	T	T	T	T	Y
S1B_31827132	C/G	1B	31827132	+	NA	NA	NA	NA	NA	NA	S	G	G	S	C	G	G	G	S	C	G	G	C	C	C	G	N	C	G	G	C	C	S	G	G	C	G	S	S	G	S	G	C	C	C	C	C	C	S
S1B_31907659	C/G	1B	31907659	+	NA	NA	NA	NA	NA	NA	S	C	C	C	C	C	C	C	C	C	C	C	C	C	C	C	C	G	C	C	C	G	C	C	C	C	C	C	C	C	C	C	N	C	C	C	C	C	C
S1B_32514577	G/A	1B	32514577	+	NA	NA	NA	NA	NA	NA	A	A	A	R	G	A	A	A	A	A	N	A	G	N	G	A	A	G	N	A	G	G	G	G	A	G	A	N	A	A	G	A	G	G	G	G	G	N	G
S1B_32514580	A/C	1B	32514580	+	NA	NA	NA	NA	NA	NA	C	C	C	M	A	C	C	C	C	C	N	C	A	N	A	C	C	A	N	C	A	A	A	A	C	A	C	N	C	C	A	C	A	A	A	A	A	N	A
S1B_32775867	T/C	1B	32775867	+	NA	NA	NA	NA	NA	NA	T	Y	C	T	T	T	T	T	Y	Y	T	T	T	T	Y	C	T	Y	C	N	T	Y	T	Y	T	T	C	T	T	C	T	T	T	T	Y	T	T	T	Y
S1B_32775921	C/T	1B	32775921	+	NA	NA	NA	NA	NA	NA	C	C	T	N	C	C	C	C	Y	Y	C	C	C	C	Y	T	C	Y	T	T	C	C	C	Y	C	C	T	C	C	T	C	C	C	C	Y	C	C	C	Y
S1B_32775932	G/A	1B	32775932	+	NA	NA	NA	NA	NA	NA	G	G	R	N	G	G	G	G	G	G	G	G	G	G	G	R	G	G	R	R	G	G	G	G	G	G	A	G	G	R	G	G	G	G	G	G	G	G	G
S1B_32775962	A/G	1B	32775962	+	NA	NA	NA	NA	NA	NA	A	A	R	N	A	A	A	A	R	R	A	A	A	A	R	R	A	R	R	R	A	A	A	R	A	A	A	A	A	R	A	A	A	A	R	A	A	A	R
S1B_32991772	T/A	1B	32991772	+	NA	NA	NA	NA	NA	NA	W	W	T	W	T	A	W	A	A	A	A	N	T	T	T	T	A	T	T	T	T	T	W	W	A	T	T	W	A	T	T	W	T	T	W	T	T	T	W
S1B_32991773	C/G	1B	32991773	+	NA	NA	NA	NA	NA	NA	C	C	C	S	G	C	S	C	C	C	C	N	S	G	G	C	C	S	C	C	G	C	S	S	C	G	C	C	C	C	S	C	G	G	S	S	G	G	S
S1B_32991783	T/A	1B	32991783	+	NA	NA	NA	NA	NA	NA	W	W	T	W	T	A	W	A	A	A	A	N	T	T	T	T	A	T	T	T	T	T	W	W	A	T	T	W	A	T	T	W	T	T	W	T	T	T	W
S1B_32991790	T/C	1B	32991790	+	NA	NA	NA	NA	NA	NA	Y	T	T	T	T	T	T	T	T	T	T	N	T	T	T	T	T	Y	T	T	T	C	T	T	T	T	T	T	T	T	T	T	T	T	T	T	T	T	T
S1B_33009286	G/T	1B	33009286	+	NA	NA	NA	NA	NA	NA	K	G	G	G	G	G	G	G	G	G	G	G	G	G	N	G	G	K	G	G	G	T	G	G	G	G	G	G	G	G	G	G	G	G	G	G	G	G	G
S1B_33009349	C/T	1B	33009349	+	NA	NA	NA	NA	NA	NA	C	C	C	C	T	C	C	C	C	C	C	C	Y	C	T	C	C	C	C	C	T	C	C	C	C	T	C	C	C	C	Y	C	Y	T	Y	Y	T	C	Y
S1B_33009370	T/C	1B	33009370	+	NA	NA	NA	NA	NA	NA	T	T	Y	T	T	T	T	T	T	T	T	T	Y	Y	T	Y	T	Y	Y	Y	T	T	Y	T	Y	T	Y	T	T	Y	Y	Y	T	T	T	Y	T	Y	T
S1B_33081336	C/T	1B	33081336	+	NA	NA	NA	NA	NA	NA	Y	Y	C	Y	C	Y	Y	Y	Y	Y	Y	Y	C	C	C	C	Y	N	C	C	C	N	T	Y	Y	C	C	Y	T	C	Y	Y	C	C	Y	Y	C	C	Y
S1B_33081348	C/T	1B	33081348	+	NA	NA	NA	NA	NA	NA	C	Y	C	Y	C	Y	Y	Y	Y	C	Y	C	C	C	C	C	Y	N	C	C	C	N	C	C	Y	C	C	Y	Y	C	Y	Y	C	C	C	C	C	C	Y
S1B_33821803	C/T	1B	33821803	+	NA	NA	NA	NA	NA	NA	C	C	C	C	C	T	C	C	C	C	C	C	C	C	Y	C	N	C	C	C	C	C	C	C	Y	C	C	C	C	C	C	C	C	T	C	C	Y	Y	C
S1B_34513594	T/C	1B	34513594	+	NA	NA	NA	NA	NA	NA	T	Y	T	Y	Y	Y	N	T	C	Y	C	Y	Y	Y	Y	T	C	T	T	T	Y	C	T	C	T	Y	T	T	Y	T	Y	Y	Y	Y	Y	Y	T	T	Y
S1B_34798163	G/A	1B	34798163	+	NA	NA	NA	NA	NA	NA	N	G	G	R	N	N	G	G	G	G	R	G	N	A	G	G	G	G	G	G	N	G	G	R	N	A	G	G	R	G	G	G	A	A	G	N	A	N	R
S1B_34798193	G/A	1B	34798193	+	NA	NA	NA	NA	NA	NA	N	R	R	R	N	N	G	G	A	A	R	G	N	A	A	R	G	A	R	R	N	A	G	R	N	A	R	G	R	G	G	G	A	A	R	N	A	N	R
S1B_34798201	A/G	1B	34798201	+	NA	NA	NA	NA	NA	NA	N	R	R	R	N	N	A	A	G	G	R	A	N	G	G	R	A	G	R	R	N	G	A	R	N	G	R	A	R	A	A	A	G	G	R	N	G	N	R
S1B_34798209	G/A	1B	34798209	+	NA	NA	NA	NA	NA	NA	N	G	G	R	N	N	G	G	G	G	R	G	N	A	G	G	G	G	G	G	N	G	G	R	N	A	G	G	R	G	G	G	A	A	G	N	A	N	R
S1B_35359247	C/G	1B	35359247	+	NA	NA	NA	NA	NA	NA	G	N	N	S	C	G	G	G	N	G	G	S	C	C	C	N	G	C	N	N	C	C	S	S	G	C	N	S	S	N	N	G	C	C	C	S	C	C	S
S1B_35359248	C/A	1B	35359248	+	NA	NA	NA	NA	NA	NA	C	N	N	M	A	C	C	C	N	C	C	C	A	A	A	N	C	C	N	N	A	C	M	M	C	A	N	M	M	N	N	C	A	A	A	M	A	A	M
S1B_35359261	T/C	1B	35359261	+	NA	NA	NA	NA	NA	NA	C	N	N	Y	T	C	C	C	N	C	C	Y	T	T	T	N	C	T	N	N	T	T	Y	Y	C	T	N	Y	Y	N	N	C	T	T	T	Y	T	T	Y
S1B_38017383	G/C	1B	38017383	+	NA	NA	NA	NA	NA	NA	G	G	G	C	C	G	S	G	G	G	G	G	N	C	N	G	G	C	G	G	C	C	G	C	G	C	G	G	S	G	C	G	C	C	N	C	C	C	S
S1B_38225358	T/C	1B	38225358	+	NA	NA	NA	NA	NA	NA	T	T	T	T	C	T	Y	T	T	T	T	T	C	C	N	T	T	Y	T	T	C	T	Y	C	T	C	T	N	Y	T	Y	T	C	C	Y	Y	C	C	Y
S1B_38225365	G/T	1B	38225365	+	NA	NA	NA	NA	NA	NA	G	G	G	G	T	G	K	G	G	G	G	G	T	T	N	G	G	K	G	G	T	G	K	T	G	T	G	N	K	G	K	G	T	T	K	K	T	T	K
S1B_38232414	C/G	1B	38232414	+	NA	NA	NA	NA	NA	NA	S	C	G	C	C	C	C	C	C	G	C	C	C	C	C	G	C	C	G	G	C	C	C	C	C	C	G	C	C	G	C	C	C	C	C	C	C	C	C
S1B_38278224	T/C	1B	38278224	+	NA	NA	NA	NA	NA	NA	Y	T	T	T	T	T	T	T	T	T	T	T	T	T	T	T	T	Y	T	T	T	C	T	T	T	T	T	T	T	T	T	N	T	T	T	T	T	T	T
S1B_38278227	A/C	1B	38278227	+	NA	NA	NA	NA	NA	NA	M	A	A	A	A	A	A	A	A	A	A	A	A	A	A	A	A	M	A	A	A	C	A	A	A	A	A	A	A	A	A	N	A	A	A	A	A	A	A
S1B_38278432	A/C	1B	38278432	+	NA	NA	NA	NA	NA	NA	M	A	M	A	A	A	A	A	M	M	A	A	A	A	A	M	A	A	M	M	A	A	A	N	A	A	C	A	A	C	A	A	A	A	A	A	A	A	A
S1B_38278433	A/G	1B	38278433	+	NA	NA	NA	NA	NA	NA	R	A	R	A	A	A	A	A	R	R	A	A	A	A	A	R	A	A	R	R	A	A	A	N	A	A	G	A	A	G	A	A	A	A	A	A	A	A	A
S1B_38286090	G/A	1B	38286090	+	NA	NA	NA	NA	NA	NA	G	G	A	G	G	G	G	G	R	A	G	G	G	G	G	A	G	G	A	A	G	G	G	G	G	G	A	G	G	A	G	G	G	G	G	G	G	G	G
S1B_38301873	C/G	1B	38301873	+	NA	NA	NA	NA	NA	NA	S	C	G	C	C	C	C	C	S	G	C	C	C	C	C	G	C	C	G	G	C	C	C	C	C	C	G	C	C	G	C	C	C	C	C	C	C	C	C
S1B_38301902	A/C	1B	38301902	+	NA	NA	NA	NA	NA	NA	M	A	C	A	A	A	A	A	M	C	A	A	A	A	A	C	A	A	C	C	A	A	A	A	A	A	C	A	A	C	A	A	A	A	A	A	A	A	A
S1B_38301903	G/C	1B	38301903	+	NA	NA	NA	NA	NA	NA	S	G	C	G	G	G	G	G	S	C	G	G	G	G	G	C	G	G	C	C	G	G	G	G	G	G	C	G	G	C	G	G	G	G	G	G	G	G	G
S1B_38583198	A/G	1B	38583198	+	NA	NA	NA	NA	NA	NA	R	R	R	R	A	A	R	R	R	R	A	R	A	R	A	R	A	R	R	R	A	A	A	A	G	A	R	R	A	R	R	R	A	A	R	R	R	A	A
S1B_39706036	C/G	1B	39706036	+	NA	NA	NA	NA	NA	NA	C	C	C	C	C	S	C	C	C	C	C	C	C	C	C	S	C	C	C	C	C	C	C	C	N	C	G	C	C	C	C	C	C	C	S	C	C	C	C
S1B_39854439	C/T	1B	39854439	+	NA	NA	NA	NA	NA	NA	C	T	T	C	C	C	T	C	C	C	C	T	C	N	C	T	C	Y	T	T	C	C	C	C	C	C	T	T	C	T	C	T	C	C	Y	C	C	C	C
S1B_40365728	C/G	1B	40365728	+	NA	NA	NA	NA	NA	NA	C	G	S	C	C	C	G	C	N	C	C	S	C	C	C	S	C	C	S	S	C	C	C	C	N	C	S	G	N	S	G	S	N	N	G	C	G	C	N
S1B_40394428	G/A	1B	40394428	+	NA	NA	NA	NA	NA	NA	G	R	G	G	N	N	R	G	G	N	G	R	G	G	G	G	N	G	G	G	G	G	G	G	G	G	G	G	G	G	R	R	G	G	G	R	G	G	G
S1B_40394460	C/T	1B	40394460	+	NA	NA	NA	NA	NA	NA	C	Y	C	C	N	N	Y	C	C	N	C	Y	C	C	C	Y	N	C	Y	Y	C	C	C	C	C	C	Y	C	C	Y	Y	Y	C	C	Y	C	C	C	C
S1B_40612892	C/T	1B	40612892	+	NA	NA	NA	NA	NA	NA	C	T	T	C	C	C	T	C	C	C	C	N	C	N	C	T	C	C	T	T	N	C	C	C	C	C	T	T	C	T	T	T	N	N	Y	C	C	C	C
S1B_40806042	T/C	1B	40806042	+	NA	NA	NA	NA	NA	NA	N	C	C	N	T	N	C	T	T	T	N	C	T	T	T	C	T	T	C	C	T	N	T	T	T	T	C	C	N	C	Y	C	T	T	T	T	C	T	T
S1B_40806096	C/T	1B	40806096	+	NA	NA	NA	NA	NA	NA	C	T	T	C	C	N	T	N	C	C	C	T	C	C	C	T	C	N	T	T	C	N	C	C	C	C	T	T	C	T	Y	T	C	C	Y	C	C	C	C
S1B_40871486	C/T	1B	40871486	+	NA	NA	NA	NA	NA	NA	C	C	C	C	C	C	N	C	C	C	C	T	C	C	C	C	C	C	N	C	C	N	N	N	C	C	C	C	N	C	T	C	N	T	C	C	Y	C	C
S1B_41843540	A/T	1B	41843540	+	NA	NA	NA	NA	NA	NA	W	A	A	W	W	W	A	W	A	W	W	A	W	A	W	A	W	T	A	A	T	A	W	W	W	T	A	W	W	A	W	A	A	W	W	W	A	T	W
S1B_41982371	C/G	1B	41982371	+	NA	NA	NA	NA	NA	NA	G	C	C	C	C	C	C	C	C	C	C	C	C	C	C	C	C	C	C	C	N	G	C	C	C	C	C	C	C	C	C	C	C	C	C	C	C	C	C
S1B_41986511	C/G	1B	41986511	+	NA	NA	NA	NA	NA	NA	C	C	C	C	C	C	C	C	C	C	S	C	C	C	C	C	C	C	C	C	C	C	S	S	C	C	C	C	C	C	C	C	S	C	S	C	C	S	C
S1B_41986520	C/G	1B	41986520	+	NA	NA	NA	NA	NA	NA	C	G	G	C	C	C	C	C	C	C	C	C	C	C	C	G	C	C	G	G	C	C	C	C	C	C	G	S	C	G	G	G	C	C	C	C	C	C	C
S1B_41986532	C/T	1B	41986532	+	NA	NA	NA	NA	NA	NA	C	C	C	C	C	C	C	C	C	C	Y	C	C	C	C	C	C	C	C	C	C	C	Y	Y	C	C	C	C	C	C	C	C	Y	C	Y	C	C	Y	C
S1B_42221461	T/A	1B	42221461	+	NA	NA	NA	NA	NA	NA	W	T	T	W	W	W	T	A	W	W	W	T	T	W	T	T	A	W	T	T	T	W	W	T	W	T	T	N	T	T	T	T	A	W	W	W	W	T	W
S1B_42221472	T/G	1B	42221472	+	NA	NA	NA	NA	NA	NA	K	T	T	K	K	K	T	G	K	K	K	T	T	K	T	T	G	K	T	T	T	K	K	T	K	T	T	N	T	T	T	T	G	K	K	K	K	T	K
S1B_44024368	C/T	1B	44024368	+	NA	NA	NA	NA	NA	NA	T	T	T	C	C	C	T	C	C	C	C	T	C	C	C	Y	C	C	T	T	C	T	C	C	C	C	N	N	C	N	C	T	C	C	C	C	C	C	C
S1B_44024374	C/A	1B	44024374	+	NA	NA	NA	NA	NA	NA	A	A	A	C	C	C	A	C	C	C	C	A	C	C	C	M	C	C	A	A	C	A	C	C	C	C	N	N	C	N	C	A	C	C	C	C	C	C	C
S1B_44024378	G/T	1B	44024378	+	NA	NA	NA	NA	NA	NA	G	T	T	G	G	G	T	G	G	G	G	G	G	G	G	K	G	G	T	T	G	G	G	G	G	G	N	N	G	N	G	T	G	G	G	G	G	G	G
S1B_44616764	C/A	1B	44616764	+	NA	NA	NA	NA	NA	NA	M	C	C	M	C	A	C	M	A	C	M	M	M	M	M	C	M	M	C	C	M	M	M	A	M	M	N	M	M	C	M	C	C	N	M	M	M	A	M
S1B_44616776	C/T	1B	44616776	+	NA	NA	NA	NA	NA	NA	Y	C	C	C	C	C	C	C	C	C	C	Y	C	Y	C	C	C	Y	C	C	C	Y	Y	C	C	C	N	C	C	C	C	C	C	N	C	C	C	T	C
S1B_45255765	A/G	1B	45255765	+	NA	NA	NA	NA	NA	NA	A	A	A	G	A	G	A	G	A	A	G	A	G	A	G	A	G	A	A	A	G	A	G	R	G	G	A	A	R	A	R	A	A	A	A	R	G	A	G
S1B_45375569	C/G	1B	45375569	+	NA	NA	NA	NA	NA	NA	S	C	C	G	C	G	N	G	S	C	G	C	G	C	G	C	G	C	C	C	G	C	S	S	G	G	C	S	G	C	S	C	C	C	C	G	G	C	G
S1B_46096627	C/A	1B	46096627	+	NA	NA	NA	NA	NA	NA	A	C	C	C	C	C	C	C	C	C	C	C	C	A	C	C	C	C	C	C	C	A	A	C	C	C	C	C	C	C	C	C	C	C	C	C	C	A	C
S1B_46228368	A/C	1B	46228368	+	NA	NA	NA	NA	NA	NA	A	M	M	A	M	N	M	A	M	C	A	M	N	N	A	M	N	C	M	C	A	N	A	M	A	A	M	C	N	C	A	M	A	C	C	A	A	N	A
S1B_46228373	A/G	1B	46228373	+	NA	NA	NA	NA	NA	NA	G	A	A	G	A	N	A	G	R	A	G	A	N	N	G	A	N	A	A	A	G	N	G	R	G	G	A	A	N	A	G	A	A	A	A	G	G	N	G
S1B_46228387	G/T	1B	46228387	+	NA	NA	NA	NA	NA	NA	T	G	G	T	G	N	G	T	K	G	T	G	N	N	T	G	N	G	G	G	T	N	T	K	T	T	G	G	N	G	T	G	G	G	G	T	T	N	T
S1B_46228392	A/G	1B	46228392	+	NA	NA	NA	NA	NA	NA	A	R	R	A	R	N	R	A	R	G	A	R	N	N	A	R	N	G	R	G	A	N	A	R	A	A	R	G	N	G	A	R	A	G	G	A	A	N	A
S1B_46257181	G/T	1B	46257181	+	NA	NA	NA	NA	NA	NA	K	G	G	T	G	T	G	T	T	G	T	G	T	G	T	G	T	G	G	G	T	G	T	K	N	T	N	G	G	G	T	G	G	G	N	T	T	G	T
S1B_46257211	G/T	1B	46257211	+	NA	NA	NA	NA	NA	NA	K	G	G	T	G	T	G	T	T	G	T	G	T	G	T	G	T	G	G	G	T	G	T	K	N	T	N	G	G	G	T	G	G	G	N	T	T	G	T
S1B_46257356	T/A	1B	46257356	+	NA	NA	NA	NA	NA	NA	N	T	T	A	T	A	T	A	T	T	A	T	A	N	A	T	A	T	N	T	A	T	A	W	N	A	T	T	T	T	A	T	T	T	T	A	A	T	A
S1B_46257370	G/A	1B	46257370	+	NA	NA	NA	NA	NA	NA	N	G	G	A	G	A	G	A	G	G	A	G	A	N	A	G	A	G	N	G	A	G	A	R	N	A	G	G	G	G	A	G	G	G	G	A	A	G	A
S1B_46389940	C/A	1B	46389940	+	NA	NA	NA	NA	NA	NA	M	C	C	A	C	A	C	A	M	C	A	C	A	C	A	C	A	C	C	C	A	N	A	C	N	A	C	C	M	C	M	C	C	C	C	A	A	C	A
S1B_46390029	C/T	1B	46390029	+	NA	NA	NA	NA	NA	NA	Y	C	C	C	C	C	C	C	C	C	C	Y	C	T	C	C	C	Y	C	C	C	T	Y	C	C	C	C	C	C	C	C	C	C	C	C	C	C	T	C
S1B_46390043	C/T	1B	46390043	+	NA	NA	NA	NA	NA	NA	Y	C	C	T	C	T	C	T	Y	C	T	C	T	C	T	C	T	C	C	C	T	C	Y	Y	T	T	C	Y	T	C	Y	C	C	C	C	Y	T	C	T
S1B_46660489	T/G	1B	46660489	+	NA	NA	NA	NA	NA	NA	G	N	G	N	G	T	K	T	N	G	T	G	T	G	N	G	N	G	G	G	N	G	T	K	T	T	G	N	T	G	T	G	G	N	N	T	N	N	T
S1B_46660512	C/G	1B	46660512	+	NA	NA	NA	NA	NA	NA	S	C	C	G	C	G	C	G	C	C	G	C	G	C	G	C	G	C	C	C	G	C	G	S	G	G	C	S	G	C	S	C	C	C	C	G	G	C	G
S1B_46883868	C/A	1B	46883868	+	NA	NA	NA	NA	NA	NA	C	C	C	A	C	A	C	A	C	C	A	N	A	C	A	C	A	C	C	C	A	C	C	C	N	A	C	M	M	C	M	C	C	C	M	A	A	C	A
S1B_46883876	T/C	1B	46883876	+	NA	NA	NA	NA	NA	NA	T	T	T	C	T	C	T	C	T	T	C	N	C	T	C	T	C	T	T	T	C	T	T	T	N	C	T	Y	Y	T	Y	T	T	T	Y	C	C	T	C
S1B_46883877	C/A	1B	46883877	+	NA	NA	NA	NA	NA	NA	C	C	C	A	C	A	C	A	C	C	A	N	A	C	A	C	A	C	C	C	A	C	C	C	N	A	C	M	M	C	M	C	C	C	M	A	A	C	A
S1B_47499177	C/T	1B	47499177	+	NA	NA	NA	NA	NA	NA	Y	C	N	C	Y	N	C	Y	C	C	C	Y	C	C	C	N	C	C	N	C	C	C	C	C	N	C	N	C	C	N	C	C	C	C	C	C	C	C	Y
S1B_47503074	A/C	1B	47503074	+	NA	NA	NA	NA	NA	NA	C	A	A	N	A	N	A	C	N	A	C	N	C	C	N	A	C	A	A	A	C	C	C	A	C	C	A	A	N	N	N	A	A	A	A	C	C	C	C
S1B_47544533	G/C	1B	47544533	+	NA	NA	NA	NA	NA	NA	G	G	G	S	S	S	G	G	G	G	G	G	G	G	G	G	S	G	G	G	G	C	G	G	G	G	G	N	S	G	G	G	S	S	G	G	S	G	G
S1B_47544548	C/T	1B	47544548	+	NA	NA	NA	NA	NA	NA	C	T	T	C	Y	C	T	C	Y	T	C	T	C	C	C	T	C	T	T	T	C	C	C	T	C	C	T	N	C	T	Y	T	Y	Y	Y	Y	C	C	C
S1B_47544550	A/G	1B	47544550	+	NA	NA	NA	NA	NA	NA	A	A	A	R	R	R	A	A	A	A	A	A	A	A	A	A	R	A	A	A	A	G	A	A	A	A	A	N	R	A	A	A	R	R	A	A	R	A	A
S1B_47544561	C/G	1B	47544561	+	NA	NA	NA	NA	NA	NA	C	G	G	C	S	C	G	C	S	G	C	G	C	C	C	G	C	G	G	G	C	C	C	G	C	C	G	N	C	G	S	G	S	S	S	S	C	C	C
S1B_47888123	C/T	1B	47888123	+	NA	NA	NA	NA	NA	NA	C	T	T	Y	T	C	Y	C	N	N	C	T	C	C	Y	T	C	Y	T	T	Y	T	Y	Y	C	C	T	T	C	N	Y	N	N	N	N	C	T	C	C
S1B_47923206	A/G	1B	47923206	+	NA	NA	NA	NA	NA	NA	R	A	A	R	N	G	G	G	N	N	G	G	G	G	N	A	G	G	A	R	R	A	R	A	G	R	A	A	A	A	R	N	A	A	R	G	G	R	R
S1B_47925602	C/T	1B	47925602	+	NA	NA	NA	NA	NA	NA	C	N	N	C	C	C	C	C	C	C	Y	C	C	C	Y	N	Y	C	N	N	C	Y	C	Y	C	C	N	C	C	N	C	C	T	T	Y	C	C	C	C
S1B_48059696	T/G	1B	48059696	+	NA	NA	NA	NA	NA	NA	N	K	K	N	T	T	K	T	T	T	G	G	K	N	T	K	T	T	K	K	G	T	N	K	N	N	K	G	N	T	G	N	N	N	K	T	T	N	T
S1B_48059705	A/T	1B	48059705	+	NA	NA	NA	NA	NA	NA	N	W	W	N	A	A	W	A	A	A	T	T	W	N	A	W	A	A	W	W	T	A	N	W	N	N	W	T	N	A	T	N	N	N	W	A	A	N	A
S1B_48059720	C/T	1B	48059720	+	NA	NA	NA	NA	NA	NA	N	Y	Y	N	C	C	Y	C	C	C	T	T	Y	N	C	Y	C	C	Y	Y	T	C	N	Y	N	N	Y	T	N	C	T	N	N	N	Y	C	C	N	C
S1B_48061635	G/T	1B	48061635	+	NA	NA	NA	NA	NA	NA	G	G	G	K	K	G	K	K	G	G	N	K	K	K	K	G	K	G	G	G	T	G	T	G	T	N	G	N	T	G	N	K	N	N	G	K	G	T	G
S1B_48061659	G/A	1B	48061659	+	NA	NA	NA	NA	NA	NA	G	G	G	R	R	G	R	R	G	G	N	R	R	R	R	G	R	G	G	G	A	G	A	G	A	N	G	N	A	G	N	R	N	N	G	R	G	A	G
S1B_48061662	C/T	1B	48061662	+	NA	NA	NA	NA	NA	NA	C	C	C	Y	Y	C	Y	Y	C	C	N	Y	Y	Y	Y	C	Y	C	C	C	T	C	T	C	T	N	C	N	T	C	N	Y	N	N	C	Y	C	T	C
S1B_48061672	C/T	1B	48061672	+	NA	NA	NA	NA	NA	NA	C	C	C	Y	Y	C	Y	C	C	C	N	Y	Y	Y	Y	C	C	C	C	C	C	C	C	C	C	N	C	N	C	C	N	Y	N	N	C	Y	C	C	C
S1B_48061683	T/A	1B	48061683	+	NA	NA	NA	NA	NA	NA	T	T	T	W	W	T	W	T	T	T	N	W	W	W	W	T	T	T	T	T	T	T	T	T	T	N	T	N	T	T	N	W	N	N	T	W	T	T	T
S1B_48263421	T/C	1B	48263421	+	NA	NA	NA	NA	NA	NA	T	C	C	T	C	T	N	T	Y	C	T	Y	N	T	N	C	T	Y	C	C	N	T	T	T	T	T	C	N	T	C	C	C	C	C	C	C	T	T	T
S1B_48263433	G/T	1B	48263433	+	NA	NA	NA	NA	NA	NA	G	T	T	G	T	G	N	G	K	T	G	K	N	G	N	T	G	K	T	T	N	G	G	G	G	G	T	N	G	T	T	T	T	T	T	T	G	G	G
S1B_48263435	G/T	1B	48263435	+	NA	NA	NA	NA	NA	NA	G	T	T	G	T	G	N	G	K	T	G	K	N	G	N	T	G	K	T	T	N	G	G	G	G	G	T	N	G	T	T	T	T	T	T	T	G	G	G
S1B_48263446	C/T	1B	48263446	+	NA	NA	NA	NA	NA	NA	C	T	T	C	T	C	N	C	Y	T	C	Y	N	C	N	T	C	Y	T	T	N	C	C	C	C	C	T	N	C	T	T	T	T	T	T	T	C	C	C
S1B_48278295	T/C	1B	48278295	+	NA	NA	NA	NA	NA	NA	T	C	C	T	C	T	C	T	C	C	T	C	T	T	T	C	T	C	C	C	T	T	T	Y	T	T	C	Y	Y	C	T	C	C	C	Y	Y	T	T	T
S1B_48278325	T/G	1B	48278325	+	NA	NA	NA	NA	NA	NA	T	G	G	T	G	T	G	T	G	G	T	G	T	T	T	G	T	G	G	G	T	T	T	K	T	T	G	K	K	G	T	G	G	G	K	K	T	T	T
S1B_48279832	T/C	1B	48279832	+	NA	NA	NA	NA	NA	NA	T	C	C	T	C	T	C	T	Y	C	N	C	T	T	N	C	T	Y	C	N	T	T	T	T	T	T	N	Y	Y	C	T	C	C	C	C	T	T	T	N
S1B_48279853	T/C	1B	48279853	+	NA	NA	NA	NA	NA	NA	T	C	C	T	C	T	C	T	Y	C	N	C	T	T	N	C	T	Y	C	N	T	T	T	T	T	T	N	Y	Y	C	T	C	C	C	C	T	T	T	N
S1B_48279869	A/G	1B	48279869	+	NA	NA	NA	NA	NA	NA	A	G	G	A	G	A	G	A	G	G	A	G	A	A	A	G	A	R	G	G	A	A	A	G	A	A	N	R	A	G	A	G	G	G	G	A	A	A	A
S1B_48714971	T/C	1B	48714971	+	NA	NA	NA	NA	NA	NA	T	C	C	T	C	T	C	T	Y	C	T	Y	T	T	T	C	T	Y	C	C	T	T	T	C	N	T	C	C	Y	C	Y	C	C	C	C	T	T	T	T
S1B_49109311	G/A	1B	49109311	+	NA	NA	NA	NA	NA	NA	G	R	R	G	G	G	R	R	G	G	R	G	R	G	G	R	G	R	A	R	G	G	G	G	G	G	R	G	R	R	N	G	R	R	R	G	G	G	R
S1B_49109356	G/A	1B	49109356	+	NA	NA	NA	NA	NA	NA	G	G	G	G	G	R	G	G	G	G	G	G	G	G	R	G	G	R	G	G	G	G	R	G	R	G	G	G	G	G	N	G	G	G	G	G	G	R	G
S1B_49632922	A/T	1B	49632922	+	NA	NA	NA	NA	NA	NA	T	A	A	A	N	N	A	A	A	N	A	W	A	A	A	A	A	A	A	A	A	T	A	N	A	A	A	A	A	A	A	A	N	A	A	A	A	A	A
S1B_49927177	A/G	1B	49927177	+	NA	NA	NA	NA	NA	NA	G	A	A	G	G	G	A	G	N	G	G	A	A	A	R	A	N	R	A	A	A	N	R	G	G	N	A	A	G	A	A	A	G	N	A	A	G	A	G
S1B_49927187	T/C	1B	49927187	+	NA	NA	NA	NA	NA	NA	C	T	T	C	C	C	T	C	N	C	C	T	T	T	Y	T	N	Y	T	T	T	N	Y	C	C	N	T	T	C	T	T	T	C	N	T	T	C	T	C
S1B_49927193	C/T	1B	49927193	+	NA	NA	NA	NA	NA	NA	T	C	C	T	T	T	C	T	N	T	T	C	C	C	Y	C	N	Y	C	C	C	N	Y	T	T	N	C	C	T	C	C	C	T	N	C	C	T	C	T
S1B_49927220	C/T	1B	49927220	+	NA	NA	NA	NA	NA	NA	T	C	C	T	C	T	C	N	T	C	N	C	C	C	C	C	N	C	C	C	C	T	C	C	T	N	C	C	N	C	C	C	C	T	C	C	N	C	T
S1B_50019843	G/A	1B	50019843	+	NA	NA	NA	NA	NA	NA	G	N	N	G	G	G	A	G	G	G	G	N	A	A	G	A	G	R	N	N	A	G	G	G	G	G	A	N	G	A	A	A	G	G	G	A	G	A	G
S1B_50086792	G/A	1B	50086792	+	NA	NA	NA	NA	NA	NA	G	G	G	G	A	G	G	G	A	A	G	G	G	G	G	G	G	R	G	G	G	G	G	A	G	G	G	G	R	G	G	G	A	G	R	G	G	G	G
S1B_50950798	C/T	1B	50950798	+	NA	NA	NA	NA	NA	NA	Y	C	C	Y	C	Y	C	Y	Y	C	Y	C	C	C	C	C	Y	C	C	C	C	C	Y	Y	Y	Y	C	C	Y	C	C	C	C	Y	C	C	Y	C	Y
S1B_50952017	G/A	1B	50952017	+	NA	NA	NA	NA	NA	NA	G	R	R	G	R	G	R	G	R	A	G	G	R	R	R	R	G	G	R	R	R	G	R	R	G	G	R	R	R	R	R	R	R	G	R	R	G	R	G
S1B_50952032	G/A	1B	50952032	+	NA	NA	NA	NA	NA	NA	G	G	G	G	G	G	G	G	G	G	R	G	R	G	R	G	G	R	G	G	G	R	G	G	G	G	G	G	R	G	G	G	R	G	G	G	G	G	G
S1B_52334849	T/C	1B	52334849	+	NA	NA	NA	NA	NA	NA	T	Y	Y	C	T	T	C	T	Y	Y	T	Y	Y	Y	Y	Y	N	Y	T	Y	Y	Y	Y	T	T	T	T	Y	Y	Y	C	Y	C	N	Y	Y	T	Y	T
S1B_52340683	G/A	1B	52340683	+	NA	NA	NA	NA	NA	NA	R	R	R	G	G	R	G	R	G	G	G	G	G	R	G	R	N	R	R	A	A	R	R	R	G	R	R	G	G	R	G	R	G	G	G	R	G	G	G
S1B_52408393	A/G	1B	52408393	+	NA	NA	NA	NA	NA	NA	G	A	A	G	A	G	A	G	G	A	N	A	A	A	A	A	G	A	A	A	A	G	G	R	N	G	A	A	R	A	A	A	A	G	A	A	G	A	G
S1B_52441764	G/T	1B	52441764	+	NA	NA	NA	NA	NA	NA	G	G	K	G	G	G	G	G	G	N	G	G	G	G	G	G	G	G	G	G	G	G	G	G	G	G	G	K	K	K	K	G	N	G	G	G	G	G	K
S1B_52441772	C/T	1B	52441772	+	NA	NA	NA	NA	NA	NA	Y	C	C	Y	C	C	C	T	T	N	Y	C	C	C	C	C	T	C	C	C	C	C	Y	C	T	T	C	C	C	C	C	C	N	T	C	C	T	C	Y
S1B_52441776	A/G	1B	52441776	+	NA	NA	NA	NA	NA	NA	A	A	R	R	A	G	A	A	A	N	R	R	R	R	A	R	A	A	A	R	R	G	R	R	A	A	A	R	R	R	R	A	N	A	A	A	A	R	R
S1B_52441777	C/T	1B	52441777	+	NA	NA	NA	NA	NA	NA	C	C	Y	C	C	C	C	C	C	N	C	C	C	C	C	C	C	C	C	C	C	C	C	C	C	C	C	Y	Y	Y	Y	C	N	C	C	C	C	C	Y
S1B_52441795	C/T	1B	52441795	+	NA	NA	NA	NA	NA	NA	C	C	Y	C	C	C	C	C	C	N	C	C	C	C	C	C	C	C	C	C	C	C	C	C	C	C	C	Y	Y	Y	Y	C	N	C	C	C	C	C	Y
S1B_52639886	C/T	1B	52639886	+	NA	NA	NA	NA	NA	NA	C	Y	Y	C	Y	C	T	C	Y	C	C	Y	C	Y	Y	Y	C	C	Y	Y	Y	C	Y	Y	C	C	T	N	C	T	Y	Y	Y	C	Y	C	C	Y	C
S1B_52639908	G/A	1B	52639908	+	NA	NA	NA	NA	NA	NA	G	G	G	R	G	R	G	G	G	G	R	G	G	G	R	G	R	G	G	G	G	G	G	R	R	R	G	N	R	G	G	G	G	R	G	G	R	G	R
S1B_52639916	C/G	1B	52639916	+	NA	NA	NA	NA	NA	NA	S	C	C	S	C	S	C	S	S	C	S	C	C	C	S	C	S	C	C	C	C	C	C	S	S	S	C	N	S	C	C	C	C	S	C	C	S	C	S
S1B_52904820	G/A	1B	52904820	+	NA	NA	NA	NA	NA	NA	G	G	G	G	A	G	G	G	G	G	G	G	G	G	G	G	N	G	G	G	G	G	G	A	G	N	G	G	R	G	G	G	A	G	R	G	N	G	G
S1B_52976568	G/A	1B	52976568	+	NA	NA	NA	NA	NA	NA	N	G	G	R	G	G	G	N	G	G	G	N	R	N	G	G	G	A	G	G	G	R	G	G	G	R	G	G	G	G	G	R	R	G	R	R	R	G	G
S1B_52976621	G/A	1B	52976621	+	NA	NA	NA	NA	NA	NA	N	G	G	R	G	G	G	N	G	G	G	N	R	N	G	G	G	A	G	G	G	R	G	G	G	R	G	G	G	G	G	R	R	G	R	R	R	G	G
S1B_53243875	A/G	1B	53243875	+	NA	NA	NA	NA	NA	NA	G	A	A	A	A	A	A	A	A	A	A	N	A	A	N	A	A	G	A	A	A	G	A	A	A	A	N	A	A	A	A	N	A	A	A	A	A	A	A
S1B_53365338	T/G	1B	53365338	+	NA	NA	NA	NA	NA	NA	K	T	K	T	T	T	T	K	T	T	T	T	T	T	K	K	T	T	K	K	T	T	T	K	T	T	K	T	T	K	T	T	T	T	K	T	K	T	K
S1B_53936847	G/A	1B	53936847	+	NA	NA	NA	NA	NA	NA	G	R	G	G	G	G	G	G	R	A	G	G	A	A	R	G	G	G	G	G	A	G	G	G	G	G	R	N	N	G	R	G	G	G	A	A	G	A	G
S1B_53936854	C/T	1B	53936854	+	NA	NA	NA	NA	NA	NA	C	C	C	C	T	C	C	C	C	C	C	C	C	C	C	C	C	C	C	C	C	C	C	Y	C	C	C	N	N	C	C	C	T	C	C	C	C	C	C
S1B_53936865	C/T	1B	53936865	+	NA	NA	NA	NA	NA	NA	C	Y	C	C	C	C	C	C	Y	T	C	C	T	T	Y	C	C	C	C	C	T	C	C	C	C	C	Y	N	N	C	Y	C	C	C	T	T	C	T	C
S1B_54112719	T/C	1B	54112719	+	NA	NA	NA	NA	NA	NA	Y	T	N	N	N	N	T	T	T	T	T	T	T	T	N	C	T	C	N	C	T	C	T	T	T	T	C	N	T	C	T	T	T	N	T	T	N	N	T
S1B_54792981	G/C	1B	54792981	+	NA	NA	NA	NA	NA	NA	G	S	N	G	G	G	G	G	S	C	G	G	S	S	S	N	G	G	N	N	S	G	C	G	G	G	N	G	G	N	G	G	G	G	G	S	G	G	G
S1B_54921061	G/A	1B	54921061	+	NA	NA	NA	NA	NA	NA	R	R	G	N	G	G	R	G	A	A	G	G	A	A	A	G	G	A	G	G	A	A	R	G	G	G	G	G	G	G	R	G	G	G	G	A	G	A	G
S1B_54938072	C/T	1B	54938072	+	NA	NA	NA	NA	NA	NA	C	Y	C	C	C	C	C	C	N	T	C	C	T	T	Y	C	C	Y	C	C	T	C	Y	C	C	C	C	N	C	C	Y	C	C	C	Y	T	C	T	C
S1B_56059690	A/C	1B	56059690	+	NA	NA	NA	NA	NA	NA	M	A	A	A	A	A	A	A	A	A	N	A	A	A	N	A	A	M	A	N	A	C	A	A	A	A	A	A	A	A	A	A	A	N	A	A	A	A	A
S1B_56134417	C/G	1B	56134417	+	NA	NA	NA	NA	NA	NA	C	S	C	C	C	C	C	C	G	G	C	S	G	G	S	C	N	S	C	C	G	C	C	C	C	C	C	S	C	C	S	C	C	C	C	S	C	G	C
S1B_56136584	C/T	1B	56136584	+	NA	NA	NA	NA	NA	NA	C	C	T	C	N	C	C	C	C	C	C	C	C	C	C	T	N	C	T	T	C	C	C	C	C	C	T	C	C	T	N	C	N	N	C	C	N	C	C
S1B_56313265	C/A	1B	56313265	+	NA	NA	NA	NA	NA	NA	C	M	A	C	A	C	C	C	M	A	C	C	A	A	N	A	C	M	A	A	N	C	A	A	C	C	A	M	C	A	M	C	A	C	A	A	C	A	C
S1B_56620305	T/A	1B	56620305	+	NA	NA	NA	NA	NA	NA	T	T	A	T	T	T	T	T	T	T	T	T	T	T	T	A	T	T	A	A	T	T	T	T	T	T	A	T	T	A	T	T	T	T	T	T	T	T	T
S1B_56620344	C/G	1B	56620344	+	NA	NA	NA	NA	NA	NA	C	C	G	C	C	C	C	C	C	C	C	C	C	C	C	G	C	C	G	G	C	C	C	C	C	C	G	C	C	G	C	C	C	C	C	C	C	C	C
S1B_56976428	G/C	1B	56976428	+	NA	NA	NA	NA	NA	NA	S	G	G	G	C	G	G	G	G	G	G	G	G	G	G	G	G	C	G	G	G	C	G	C	G	G	G	G	S	G	G	G	C	G	S	G	G	G	G
S1B_57643822	C/T	1B	57643822	+	NA	NA	NA	NA	NA	NA	Y	Y	Y	Y	Y	Y	Y	C	C	C	C	C	C	Y	C	Y	T	Y	C	N	Y	C	Y	C	Y	Y	Y	Y	C	C	Y	Y	C	C	Y	Y	C	C	Y
S1B_57687500	A/G	1B	57687500	+	NA	NA	NA	NA	NA	NA	R	G	A	A	G	A	R	N	G	G	A	A	G	G	G	A	N	G	A	A	G	G	R	R	A	A	A	R	R	A	A	A	G	A	G	G	A	G	A
S1B_57706626	G/A	1B	57706626	+	NA	NA	NA	NA	NA	NA	N	R	G	G	G	N	G	G	G	A	G	G	A	A	G	G	G	G	G	G	G	G	A	G	G	G	G	N	G	G	N	G	G	G	G	R	G	N	G
S1B_57723630	G/A	1B	57723630	+	NA	NA	NA	NA	NA	NA	R	G	G	G	A	N	N	G	G	G	G	N	G	G	G	G	G	A	G	G	G	A	G	R	G	G	G	G	R	G	G	N	A	G	R	G	G	G	G
S1B_57723879	C/T	1B	57723879	+	NA	NA	NA	NA	NA	NA	Y	C	C	C	T	C	C	C	C	C	C	N	C	C	C	C	C	T	C	C	C	T	C	Y	C	C	C	C	Y	C	N	N	T	C	T	C	C	C	C
S1B_57760016	G/A	1B	57760016	+	NA	NA	NA	NA	NA	NA	G	A	G	G	G	G	G	G	A	A	N	G	A	A	A	N	G	G	G	N	A	G	G	G	G	N	G	N	G	G	G	G	N	G	A	A	G	A	G
S1B_57760042	G/A	1B	57760042	+	NA	NA	NA	NA	NA	NA	G	A	G	G	G	G	G	G	A	A	N	G	A	A	A	N	G	G	G	N	A	G	G	G	G	N	G	N	G	G	G	G	N	G	A	A	G	A	G
S1B_58553612	A/G	1B	58553612	+	NA	NA	NA	NA	NA	NA	A	A	A	A	A	A	A	A	A	A	A	A	A	A	R	A	R	A	A	A	A	A	A	A	A	R	A	A	A	A	A	A	A	R	A	A	R	N	A
S1B_58553613	T/C	1B	58553613	+	NA	NA	NA	NA	NA	NA	Y	C	Y	Y	Y	Y	Y	Y	Y	Y	Y	T	T	Y	T	Y	Y	Y	Y	Y	T	T	Y	Y	Y	Y	C	Y	Y	Y	Y	C	C	Y	Y	Y	Y	N	Y
S1B_58553615	C/A	1B	58553615	+	NA	NA	NA	NA	NA	NA	C	C	C	C	C	C	C	C	C	C	C	C	C	C	M	C	M	C	C	C	C	C	C	C	C	M	C	C	C	C	C	C	C	M	C	C	M	N	C
S1B_58553619	C/T	1B	58553619	+	NA	NA	NA	NA	NA	NA	C	C	C	C	C	C	C	C	C	C	C	C	C	C	Y	C	Y	C	C	C	C	C	C	C	C	Y	C	C	C	C	C	C	C	Y	C	C	Y	N	C
S1B_58553634	C/T	1B	58553634	+	NA	NA	NA	NA	NA	NA	C	C	C	C	C	C	C	C	C	C	C	C	C	C	Y	C	Y	C	C	C	C	C	C	C	C	Y	C	C	C	C	C	C	C	Y	C	C	Y	N	C
S1B_58989138	A/G	1B	58989138	+	NA	NA	NA	NA	NA	NA	N	A	R	R	G	N	G	N	A	A	G	N	G	A	G	R	G	R	R	G	A	R	A	R	A	R	A	N	A	G	G	R	A	R	R	G	N	A	A
S1B_58989192	A/C	1B	58989192	+	NA	NA	NA	NA	NA	NA	N	A	M	A	A	N	A	N	A	M	A	N	A	A	A	M	A	A	M	A	A	A	C	M	M	A	M	N	M	A	A	A	C	A	M	A	N	A	A
S1B_59044586	G/A	1B	59044586	+	NA	NA	NA	NA	NA	NA	R	G	G	G	A	G	G	G	G	G	G	G	G	G	G	G	G	G	G	G	G	A	G	R	G	G	N	G	R	G	G	G	A	G	R	G	G	N	G
S1B_59193635	T/C	1B	59193635	+	NA	NA	NA	NA	NA	NA	N	T	T	C	T	C	T	Y	Y	T	C	T	T	N	T	T	T	T	N	T	T	T	C	Y	C	T	T	T	N	N	T	N	N	T	T	T	T	T	Y
S1B_59193638	A/G	1B	59193638	+	NA	NA	NA	NA	NA	NA	N	A	A	G	A	G	A	R	R	A	G	A	A	N	A	A	A	A	N	A	A	A	G	R	G	A	A	A	N	N	A	N	N	A	A	A	A	A	R
S1B_59193648	C/A	1B	59193648	+	NA	NA	NA	NA	NA	NA	N	C	C	C	A	C	C	C	C	C	C	C	C	N	C	C	C	C	N	C	C	A	C	M	C	C	C	C	N	N	C	N	N	C	A	C	C	C	C
S1B_59964208	G/A	1B	59964208	+	NA	NA	NA	NA	NA	NA	A	A	R	G	G	G	A	R	R	A	R	A	R	G	G	R	R	R	R	R	G	G	R	G	G	R	R	R	G	A	A	A	G	R	R	A	A	N	R
S1B_60256467	T/C	1B	60256467	+	NA	NA	NA	NA	NA	NA	T	T	T	T	C	T	T	T	T	T	T	T	T	T	T	T	T	T	T	T	T	C	T	Y	T	T	T	T	Y	T	T	T	C	T	Y	T	T	T	T
S1B_60256473	A/G	1B	60256473	+	NA	NA	NA	NA	NA	NA	A	A	A	A	G	A	A	A	A	A	A	A	A	A	A	A	A	A	A	A	A	G	A	R	A	A	A	A	R	A	A	A	G	A	R	A	A	A	A
S1B_60270868	T/C	1B	60270868	+	NA	NA	NA	NA	NA	NA	Y	T	T	T	C	T	T	T	T	T	T	T	T	T	T	T	T	T	T	T	T	C	T	C	T	T	T	T	Y	T	T	T	C	T	Y	T	T	T	T
S1B_60474032	C/A	1B	60474032	+	NA	NA	NA	NA	NA	NA	M	C	C	C	A	C	C	C	C	C	C	C	C	C	C	C	C	C	C	C	C	A	C	M	C	C	C	C	A	C	C	C	A	C	M	C	C	C	C
S1B_60587071	C/T	1B	60587071	+	NA	NA	NA	NA	NA	NA	Y	C	C	T	C	T	N	T	C	C	T	N	C	C	C	C	C	N	C	C	C	C	Y	Y	N	C	C	C	N	C	N	N	C	C	C	C	C	C	T
S1B_60608834	C/G	1B	60608834	+	NA	NA	NA	NA	NA	NA	S	C	C	G	C	G	C	G	S	C	G	C	C	C	C	C	C	C	C	C	C	C	S	S	G	N	C	N	S	C	C	C	C	C	C	C	C	C	S
S1B_60609125	C/T	1B	60609125	+	NA	NA	NA	NA	NA	NA	Y	N	C	T	C	T	C	T	Y	C	T	C	C	C	C	C	C	C	C	C	C	C	Y	Y	T	C	C	C	Y	C	C	C	C	C	C	C	C	C	Y
S1B_60609411	G/A	1B	60609411	+	NA	NA	NA	NA	NA	NA	R	G	G	A	G	A	G	A	R	G	A	G	G	G	G	G	G	G	G	G	G	G	R	R	A	G	G	G	R	G	G	G	G	G	G	G	G	G	R
S1B_61443115	T/C	1B	61443115	+	NA	NA	NA	NA	NA	NA	T	T	T	N	T	N	T	N	T	T	C	T	T	T	T	T	T	T	T	T	T	T	N	T	N	T	T	T	Y	T	T	T	T	T	T	T	T	T	Y
S1B_61443147	T/C	1B	61443147	+	NA	NA	NA	NA	NA	NA	T	T	T	N	T	N	T	N	T	T	C	T	T	T	T	T	T	T	T	T	T	T	N	T	N	T	T	T	Y	T	T	T	T	T	T	T	T	T	Y
S1B_61956032	C/T	1B	61956032	+	NA	NA	NA	NA	NA	NA	Y	Y	C	C	C	Y	C	Y	Y	T	C	Y	C	N	N	Y	Y	C	Y	Y	C	C	C	T	Y	C	Y	N	Y	C	C	Y	C	N	C	Y	C	C	Y
S1B_61956040	C/T	1B	61956040	+	NA	NA	NA	NA	NA	NA	Y	Y	C	C	C	Y	C	Y	Y	T	C	Y	C	N	N	Y	Y	C	Y	Y	C	C	C	T	Y	C	Y	N	Y	C	C	Y	C	N	C	Y	C	C	Y
S1B_61956053	G/A	1B	61956053	+	NA	NA	NA	NA	NA	NA	G	G	G	G	G	R	G	R	R	R	G	R	G	N	N	G	R	G	G	G	G	G	G	A	R	G	G	N	G	G	G	R	G	N	G	R	G	G	R
S1B_63968337	G/A	1B	63968337	+	NA	NA	NA	NA	NA	NA	A	R	G	G	A	R	R	R	R	R	R	A	R	R	A	R	G	R	R	R	R	R	R	A	A	R	R	R	A	R	A	R	A	R	G	R	R	R	R
S1B_64931106	G/A	1B	64931106	+	NA	NA	NA	NA	NA	NA	G	G	G	G	G	G	G	G	G	G	G	G	G	G	G	G	G	G	G	G	G	R	G	R	G	G	G	G	G	G	G	G	A	G	G	G	G	G	G
S1B_65346166	A/G	1B	65346166	+	NA	NA	NA	NA	NA	NA	R	R	R	R	A	R	R	R	R	R	A	R	R	R	A	R	R	R	R	R	R	A	R	A	R	A	R	A	A	R	R	R	A	A	R	R	R	R	A
S1B_65775748	G/A	1B	65775748	+	NA	NA	NA	NA	NA	NA	R	G	A	G	G	G	G	R	A	R	G	G	G	G	G	R	N	G	A	R	G	N	G	R	A	R	R	G	R	A	G	G	R	G	G	G	G	N	G
S1B_65775769	C/T	1B	65775769	+	NA	NA	NA	NA	NA	NA	Y	T	T	Y	C	C	Y	Y	T	Y	C	T	C	C	T	Y	N	C	T	Y	T	N	C	Y	T	Y	Y	Y	Y	T	T	Y	Y	C	Y	C	Y	N	C
S1B_65775782	G/A	1B	65775782	+	NA	NA	NA	NA	NA	NA	G	A	G	R	G	G	R	G	G	G	G	A	G	G	A	G	N	G	G	G	A	N	G	G	G	G	G	R	G	G	A	R	G	G	R	G	R	N	G
S1B_65775832	G/A	1B	65775832	+	NA	NA	NA	NA	NA	NA	G	R	G	R	G	G	R	G	G	G	G	R	G	G	R	G	G	G	G	G	R	G	N	G	G	G	G	A	G	G	R	R	G	G	R	G	R	G	G
S1B_67534688	C/T	1B	67534688	+	NA	NA	NA	NA	NA	NA	Y	C	C	C	T	N	N	C	T	T	C	C	C	N	C	C	T	T	C	N	N	T	N	T	N	T	C	N	Y	C	N	C	T	T	T	N	N	T	Y
S1B_69260277	G/T	1B	69260277	+	NA	NA	NA	NA	NA	NA	G	G	G	G	G	G	G	G	G	G	G	G	G	G	G	G	G	G	G	G	G	G	G	G	G	G	G	G	G	G	G	G	G	G	G	G	G	G	G
S1B_69531702	T/C	1B	69531702	+	NA	NA	NA	NA	NA	NA	T	Y	T	Y	T	N	T	T	T	T	T	Y	T	T	T	T	T	T	T	T	T	T	T	T	N	T	T	Y	T	T	T	T	T	T	T	T	T	T	Y
S1B_69531721	C/T	1B	69531721	+	NA	NA	NA	NA	NA	NA	C	Y	C	Y	C	N	C	C	C	C	C	Y	C	C	C	C	C	C	C	C	C	C	C	C	N	C	C	Y	C	C	C	C	C	C	C	C	C	C	Y
S1B_69531727	A/G	1B	69531727	+	NA	NA	NA	NA	NA	NA	A	R	A	R	A	N	A	A	A	A	A	R	A	A	A	A	A	A	A	A	A	A	A	A	N	A	A	R	A	A	A	A	A	A	A	A	A	A	R
S1B_69531746	G/A	1B	69531746	+	NA	NA	NA	NA	NA	NA	G	R	G	R	G	N	G	G	G	G	G	R	G	G	G	G	G	G	G	G	G	G	G	G	N	G	G	R	G	G	G	G	G	G	G	G	G	G	R
S1B_70190676	C/T	1B	70190676	+	NA	NA	NA	NA	NA	NA	C	C	C	C	C	C	C	C	C	C	C	C	C	C	C	C	C	C	C	C	C	C	C	C	N	C	C	C	C	C	C	C	C	C	C	C	C	C	C
S1B_71297383	T/C	1B	71297383	+	NA	NA	NA	NA	NA	NA	T	T	T	T	C	T	T	T	T	T	T	N	T	T	T	T	C	T	T	T	T	T	N	Y	T	C	T	T	Y	T	N	T	C	T	Y	T	T	T	T
S1B_75079625	C/T	1B	75079625	+	NA	NA	NA	NA	NA	NA	Y	Y	C	C	N	C	N	C	T	T	C	C	T	T	T	C	T	T	C	C	T	T	Y	N	C	T	C	N	N	C	Y	C	T	T	T	T	T	T	Y
S1B_76028751	C/G	1B	76028751	+	NA	NA	NA	NA	NA	NA	C	C	S	S	C	C	N	G	C	C	C	C	C	N	N	S	C	N	C	S	N	N	C	C	N	C	S	N	C	G	C	C	C	C	C	C	C	C	N
S1B_78323815	C/A	1B	78323815	+	NA	NA	NA	NA	NA	NA	M	M	C	N	A	C	C	N	C	N	C	M	A	A	A	C	A	A	C	C	A	A	C	A	C	A	C	C	M	C	M	C	A	A	M	A	A	A	A
S1B_79907381	G/A	1B	79907381	+	NA	NA	NA	NA	NA	NA	R	G	R	G	G	G	R	R	G	G	R	G	G	R	G	G	N	G	G	R	R	R	G	G	G	G	G	G	R	G	G	R	G	G	R	G	G	G	G
S1B_79907390	T/C	1B	79907390	+	NA	NA	NA	NA	NA	NA	T	T	T	T	T	T	T	T	T	T	Y	T	T	T	Y	T	N	T	T	T	T	T	T	T	T	T	T	T	T	T	T	T	Y	T	T	T	T	T	T
S1B_83814351	A/G	1B	83814351	+	NA	NA	NA	NA	NA	NA	A	R	R	A	A	A	G	R	A	A	A	N	A	A	G	R	R	A	A	R	R	N	N	G	A	R	R	A	A	R	R	A	A	R	N	R	A	A	G
S1B_83814356	T/C	1B	83814356	+	NA	NA	NA	NA	NA	NA	T	Y	Y	T	T	T	C	Y	T	T	T	N	T	T	C	Y	Y	T	T	Y	Y	N	N	C	T	Y	Y	T	T	Y	Y	T	T	Y	N	Y	T	T	C
S1B_83814359	G/A	1B	83814359	+	NA	NA	NA	NA	NA	NA	G	G	G	G	G	G	R	R	G	G	G	N	G	G	A	R	R	G	G	R	G	N	N	A	G	R	G	G	G	G	G	G	G	G	N	G	G	G	A
S1B_85142874	C/T	1B	85142874	+	NA	NA	NA	NA	NA	NA	C	Y	Y	C	Y	Y	N	C	C	Y	C	C	C	C	C	C	C	N	C	Y	N	C	C	Y	N	C	Y	N	T	C	Y	Y	C	C	C	C	N	C	C
S1B_85287658	T/A	1B	85287658	+	NA	NA	NA	NA	NA	NA	A	T	T	T	A	T	T	T	W	A	T	W	A	A	A	T	A	A	T	T	A	A	W	W	T	A	T	T	T	T	T	T	A	A	W	A	A	A	W
S1B_86948093	C/T	1B	86948093	+	NA	NA	NA	NA	NA	NA	C	Y	C	N	N	C	N	C	T	T	C	Y	T	T	N	C	C	N	C	C	T	N	C	T	C	N	C	C	Y	C	N	N	T	T	Y	Y	T	T	Y
S1B_86948165	A/C	1B	86948165	+	NA	NA	NA	NA	NA	NA	A	A	A	A	C	A	A	A	C	C	A	M	C	N	C	A	M	C	A	A	C	N	A	M	A	C	A	A	M	A	M	A	N	C	C	M	C	C	A
S1B_87134472	C/T	1B	87134472	+	NA	NA	NA	NA	NA	NA	Y	Y	C	C	T	C	C	C	T	T	C	C	T	T	T	C	T	T	C	N	T	T	N	Y	C	T	C	N	Y	C	N	C	T	T	Y	T	T	T	Y
S1B_87134499	A/T	1B	87134499	+	NA	NA	NA	NA	NA	NA	W	W	A	A	T	A	A	A	T	T	A	A	T	T	T	A	T	T	A	N	T	T	N	W	A	T	A	N	W	A	N	A	T	T	W	T	T	T	W
S1B_89404780	G/A	1B	89404780	+	NA	NA	NA	NA	NA	NA	R	G	R	R	G	R	G	R	R	G	R	R	G	G	G	R	G	G	R	R	G	G	G	G	R	G	R	G	R	R	R	G	G	G	R	G	G	G	G
S1B_89404786	T/C	1B	89404786	+	NA	NA	NA	NA	NA	NA	Y	T	Y	Y	T	Y	T	Y	Y	T	Y	Y	T	T	T	Y	T	T	Y	Y	T	T	T	T	Y	T	Y	T	Y	Y	Y	T	T	T	Y	T	T	T	T
S1B_89404867	T/A	1B	89404867	+	NA	NA	NA	NA	NA	NA	W	W	T	T	A	T	T	T	A	A	T	T	A	A	A	T	A	A	T	T	A	A	W	A	T	A	T	W	W	T	T	T	A	A	A	T	A	A	W
S1B_89450786	T/A	1B	89450786	+	NA	NA	NA	NA	NA	NA	W	T	T	T	A	T	T	T	W	A	T	T	A	A	A	T	A	A	T	T	A	A	W	W	T	A	T	W	W	T	T	T	A	A	T	A	A	A	W
S1B_90226495	G/C	1B	90226495	+	NA	NA	NA	NA	NA	NA	C	S	G	G	C	G	G	G	S	C	G	G	C	C	C	G	C	C	G	G	C	C	S	S	G	C	G	G	S	G	G	G	C	C	G	C	C	C	G
S1B_90427143	G/T	1B	90427143	+	NA	NA	NA	NA	NA	NA	G	G	G	T	G	T	G	T	K	G	T	G	G	G	G	G	G	G	G	G	G	G	K	K	T	G	G	G	G	G	G	G	G	G	G	G	G	G	K
S1B_90427148	A/G	1B	90427148	+	NA	NA	NA	NA	NA	NA	A	A	A	G	A	G	A	G	R	A	G	A	A	A	A	A	A	A	A	A	A	A	R	R	G	A	A	A	A	A	A	A	A	A	A	A	A	A	R
S1B_90427155	C/A	1B	90427155	+	NA	NA	NA	NA	NA	NA	C	C	C	A	C	A	C	A	M	C	A	C	C	C	C	C	C	C	C	C	C	C	M	M	A	C	C	C	C	C	C	C	C	C	C	C	C	C	M
S1B_90699887	A/C	1B	90699887	+	NA	NA	NA	NA	NA	NA	A	M	C	A	A	N	C	A	A	A	N	M	A	A	A	C	A	A	C	C	A	A	A	A	A	A	C	M	A	N	M	C	A	A	M	M	A	A	A
S1B_92327207	A/T	1B	92327207	+	NA	NA	NA	NA	NA	NA	W	A	A	A	T	A	A	A	T	T	N	A	A	A	A	A	W	A	A	A	A	T	A	W	N	W	A	A	A	A	A	A	W	A	W	A	T	A	W
S1B_92327221	T/C	1B	92327221	+	NA	NA	NA	NA	NA	NA	Y	T	T	T	C	T	T	T	C	C	N	T	T	T	T	T	Y	T	T	T	T	C	T	Y	N	Y	T	T	T	T	T	T	Y	T	Y	T	C	T	Y
S1B_92327273	A/G	1B	92327273	+	NA	NA	NA	NA	NA	NA	R	R	R	R	G	R	R	R	R	N	G	R	R	A	R	A	R	R	A	R	R	N	R	N	R	R	R	R	R	R	R	A	R	A	A	R	N	R	R
S1B_93180131	T/G	1B	93180131	+	NA	NA	NA	NA	NA	NA	T	K	G	T	T	T	K	N	T	T	T	G	T	T	T	G	T	T	G	N	T	T	T	N	T	T	G	N	T	G	K	G	N	T	N	N	T	T	T
S1B_93946603	T/C	1B	93946603	+	NA	NA	NA	NA	NA	NA	T	Y	T	T	T	T	T	T	T	T	T	T	C	T	T	T	T	C	T	T	T	T	T	T	T	T	T	T	T	T	T	T	T	T	T	C	C	T	T
S1B_93951634	T/A	1B	93951634	+	NA	NA	NA	NA	NA	NA	W	W	T	W	A	W	W	W	T	T	W	W	T	T	W	T	T	W	T	T	W	T	W	T	T	T	T	W	T	T	W	W	T	T	W	W	W	W	W
S1B_94236664	G/C	1B	94236664	+	NA	NA	NA	NA	NA	NA	C	G	G	G	C	G	G	G	N	C	G	N	G	C	C	G	C	S	G	G	C	C	G	S	G	C	G	N	G	G	G	G	C	C	G	G	C	N	S
S1B_94236672	G/A	1B	94236672	+	NA	NA	NA	NA	NA	NA	A	G	G	G	A	G	G	G	N	A	G	N	A	A	A	G	A	R	G	G	A	A	G	R	G	A	G	N	G	G	G	G	A	A	G	A	A	N	R
S1B_94330218	C/A	1B	94330218	+	NA	NA	NA	NA	NA	NA	M	C	C	C	A	C	M	C	M	A	C	C	A	A	A	N	A	C	N	C	A	A	M	A	C	A	C	A	M	C	N	C	A	A	M	A	A	A	M
S1B_94330243	G/A	1B	94330243	+	NA	NA	NA	NA	NA	NA	R	G	G	G	A	G	R	G	R	A	G	G	A	A	A	N	A	G	N	G	A	A	R	A	G	A	G	A	R	G	N	G	A	A	R	A	A	A	R
S1B_94330255	C/T	1B	94330255	+	NA	NA	NA	NA	NA	NA	Y	C	C	C	T	C	Y	C	Y	T	C	C	T	T	T	N	T	C	N	C	T	T	Y	T	C	T	C	T	Y	C	N	C	T	T	Y	T	T	T	Y
S1B_94928843	A/G	1B	94928843	+	NA	NA	NA	NA	NA	NA	N	G	G	R	A	R	G	R	R	A	R	R	A	A	A	R	R	R	R	R	A	A	R	R	R	A	A	A	A	R	R	R	A	A	A	R	A	A	R
S1B_94928855	G/A	1B	94928855	+	NA	NA	NA	NA	NA	NA	N	G	G	R	G	R	G	R	G	G	R	R	G	G	G	R	R	R	R	R	G	G	R	R	R	G	A	A	A	R	R	R	G	G	R	R	G	G	R
S1B_94981389	T/C	1B	94981389	+	NA	NA	NA	NA	NA	NA	T	T	N	C	T	Y	N	Y	T	T	T	N	C	T	T	T	T	Y	Y	C	T	T	Y	T	N	T	T	N	T	Y	T	Y	N	T	N	Y	T	N	Y
S1B_95344241	G/C	1B	95344241	+	NA	NA	NA	NA	NA	NA	G	S	S	S	N	N	S	N	S	S	N	S	G	G	S	S	G	G	C	C	S	S	G	N	G	S	S	S	S	C	G	S	S	C	S	S	C	G	S
S1B_95344260	A/G	1B	95344260	+	NA	NA	NA	NA	NA	NA	A	A	A	A	N	N	A	N	A	A	N	A	A	A	R	A	A	A	A	A	A	A	A	N	A	A	A	R	A	A	A	A	A	A	A	A	G	A	A
S1B_95367617	G/A	1B	95367617	+	NA	NA	NA	NA	NA	NA	R	R	A	A	G	N	N	A	G	G	A	G	G	G	G	A	G	R	A	A	G	G	R	R	N	G	A	A	R	A	N	A	G	G	G	R	G	G	R
S1B_95483158	C/G	1B	95483158	+	NA	NA	NA	NA	NA	NA	S	S	C	C	G	C	C	C	G	G	C	S	G	G	G	C	S	S	C	C	G	G	S	S	C	G	C	S	S	C	C	C	G	G	S	G	G	G	S
S1B_98938026	T/A	1B	98938026	+	NA	NA	NA	NA	NA	NA	T	T	T	T	A	T	W	T	A	A	T	T	A	A	A	T	A	T	T	T	A	A	T	W	T	A	T	T	N	T	W	T	N	A	A	A	A	N	T
S1B_99073770	T/A	1B	99073770	+	NA	NA	NA	NA	NA	NA	W	W	T	T	A	T	T	T	W	A	T	T	A	A	A	T	W	W	T	T	A	A	N	W	N	A	T	T	T	T	T	T	A	A	A	A	A	A	N
S1B_99073780	G/T	1B	99073780	+	NA	NA	NA	NA	NA	NA	G	G	G	G	G	G	G	G	K	T	G	G	G	G	G	G	G	G	G	G	G	G	N	G	N	G	G	G	G	G	G	G	G	G	G	G	G	G	N
S1B_99073802	T/C	1B	99073802	+	NA	NA	NA	NA	NA	NA	Y	Y	T	T	C	T	T	T	Y	C	T	T	C	C	C	T	Y	Y	T	T	C	C	N	Y	N	C	T	T	T	T	T	T	C	C	C	C	C	C	N
S1B_99695800	C/T	1B	99695800	+	NA	NA	NA	NA	NA	NA	Y	Y	C	C	T	C	C	C	Y	T	C	C	T	T	N	N	T	C	C	C	T	T	Y	Y	N	T	C	C	Y	N	T	C	T	T	Y	T	T	T	T
S1B_99799618	G/T	1B	99799618	+	NA	NA	NA	NA	NA	NA	K	K	G	G	T	G	G	G	G	N	G	G	T	T	T	G	K	G	N	G	T	T	T	K	N	T	N	G	G	G	K	G	T	N	K	T	T	T	G
S1B_99860154	A/C	1B	99860154	+	NA	NA	NA	NA	NA	NA	M	A	A	A	M	A	A	M	M	M	M	N	M	M	C	A	M	A	M	M	M	M	M	M	A	M	M	A	M	A	M	A	M	M	M	M	M	M	M
S1B_101143692	C/T	1B	101143692	+	NA	NA	NA	NA	NA	NA	C	C	C	C	C	C	C	C	C	C	C	C	C	C	C	C	C	T	C	C	C	C	C	C	C	C	C	C	C	C	C	C	C	C	C	C	C	C	C
S1B_102155019	A/G	1B	102155019	+	NA	NA	NA	NA	NA	NA	R	R	G	G	A	G	G	G	R	A	G	G	A	A	A	G	R	A	G	G	A	A	R	R	G	A	G	N	G	G	G	G	A	A	R	A	A	A	R
S1B_105232240	C/A	1B	105232240	+	NA	NA	NA	NA	NA	NA	A	M	C	C	A	N	M	C	A	A	C	C	A	A	A	C	M	M	C	C	A	A	M	M	C	A	M	C	M	N	C	C	A	A	A	A	A	A	M
S1B_105295436	G/A	1B	105295436	+	NA	NA	NA	NA	NA	NA	R	N	N	G	G	G	A	A	G	G	A	A	G	G	R	N	G	R	G	N	R	R	G	R	A	R	N	A	R	G	R	R	R	G	A	R	R	N	A
S1B_105295445	C/G	1B	105295445	+	NA	NA	NA	NA	NA	NA	S	N	N	C	C	C	G	G	C	C	G	G	C	C	S	N	C	S	C	N	S	S	C	S	G	S	N	G	S	C	S	S	S	C	G	S	S	N	G
S1B_105295446	G/A	1B	105295446	+	NA	NA	NA	NA	NA	NA	G	N	N	G	G	G	G	G	G	G	G	G	G	G	G	N	G	G	A	N	R	G	G	G	G	G	N	G	G	A	R	R	G	G	G	G	G	N	G
S1B_105295475	G/A	1B	105295475	+	NA	NA	NA	NA	NA	NA	G	N	N	A	G	G	G	G	A	G	G	G	R	G	G	N	G	R	G	N	G	G	G	G	G	G	N	G	G	G	G	G	G	R	G	G	G	N	G
S1B_106765671	T/G	1B	106765671	+	NA	NA	NA	NA	NA	NA	T	K	T	T	G	T	T	T	T	G	T	T	G	G	G	T	K	G	T	T	G	G	G	K	T	G	T	T	N	T	K	T	G	G	T	K	G	G	K
S1B_106765689	G/A	1B	106765689	+	NA	NA	NA	NA	NA	NA	G	R	G	G	A	G	G	G	G	A	G	G	A	A	A	G	R	A	G	G	A	A	A	R	G	A	G	G	N	G	R	G	A	A	G	R	A	A	R
S1B_106906880	T/A	1B	106906880	+	NA	NA	NA	NA	NA	NA	T	N	T	T	A	T	N	T	T	T	T	T	T	N	N	T	A	T	T	T	T	N	N	W	T	A	T	T	T	T	T	T	N	T	A	N	T	N	T
S1B_107130960	C/G	1B	107130960	+	NA	NA	NA	NA	NA	NA	C	C	S	C	C	C	S	S	S	S	S	S	C	C	C	S	S	S	S	S	C	C	S	C	S	C	S	G	C	S	S	S	C	C	C	C	C	C	S
S1B_107131001	C/G	1B	107131001	+	NA	NA	NA	NA	NA	NA	C	C	S	C	C	C	S	S	S	S	S	S	C	C	C	S	S	S	S	S	C	C	S	C	S	C	S	G	C	S	S	S	C	C	C	C	C	C	S
S1B_107131036	G/A	1B	107131036	+	NA	NA	NA	NA	NA	NA	G	R	R	R	G	R	R	R	R	R	R	R	G	G	G	R	G	G	R	R	G	G	R	G	R	G	R	R	G	R	G	R	G	G	R	G	G	G	R
S1B_107131046	G/C	1B	107131046	+	NA	NA	NA	NA	NA	NA	G	S	S	S	G	S	S	S	S	S	S	S	G	G	G	S	G	G	S	S	G	G	S	G	S	G	S	S	G	S	G	S	G	G	S	G	G	G	S
S1B_107131062	A/T	1B	107131062	+	NA	NA	NA	NA	NA	NA	A	W	W	W	A	W	W	W	W	W	W	W	A	A	A	W	A	A	W	W	A	A	W	A	W	A	W	W	A	W	A	W	A	A	W	A	A	A	W
S1B_107133489	A/G	1B	107133489	+	NA	NA	NA	NA	NA	NA	A	A	N	A	A	A	N	A	R	G	A	A	A	A	A	A	A	R	A	A	A	A	A	A	A	A	A	A	A	A	A	A	A	A	A	A	G	A	A
S1B_107138971	T/G	1B	107138971	+	NA	NA	NA	NA	NA	NA	T	T	T	T	T	T	T	T	K	G	T	T	T	T	T	T	T	T	T	T	T	T	T	T	T	T	T	T	T	T	T	T	T	T	T	T	G	T	T
S1B_107146777	C/T	1B	107146777	+	NA	NA	NA	NA	NA	NA	C	N	C	C	C	N	N	C	N	T	C	N	C	C	C	C	C	T	C	C	C	C	N	C	N	C	C	C	N	C	C	C	C	C	C	C	T	C	C
S1B_107146799	G/A	1B	107146799	+	NA	NA	NA	NA	NA	NA	G	N	G	G	G	N	N	G	N	A	G	N	G	G	G	G	G	A	G	G	G	G	N	G	N	G	G	G	N	G	G	G	G	G	G	G	A	G	G
S1B_107146806	C/T	1B	107146806	+	NA	NA	NA	NA	NA	NA	C	N	C	C	C	N	N	C	N	T	C	N	C	C	C	C	C	T	C	C	C	C	N	C	N	C	C	C	N	C	C	C	C	C	C	C	T	C	C
S1B_107146819	G/A	1B	107146819	+	NA	NA	NA	NA	NA	NA	G	N	G	G	G	N	N	G	N	A	G	N	G	G	G	G	G	A	G	G	G	G	N	G	N	G	G	G	N	G	G	G	G	G	G	G	A	G	G
S1B_107527317	A/G	1B	107527317	+	NA	NA	NA	NA	NA	NA	A	A	A	A	A	A	A	A	G	G	A	A	A	A	A	A	A	R	A	A	A	A	A	N	A	A	A	A	A	A	A	A	A	A	A	A	N	A	A
S1B_107527340	C/T	1B	107527340	+	NA	NA	NA	NA	NA	NA	C	C	C	C	C	C	C	C	Y	T	C	C	C	C	C	C	C	Y	C	C	C	C	N	C	C	C	C	C	C	C	C	C	C	C	C	C	T	C	C
[truncated: 33,940 more rows]
[truncated: 62 more columns]
